# Supplementary material for: RNA Interference Pathways in <em>Juglandaceae</em>: Based on Gene Diversity, Evolution, and Functional Differentiation
Source: Preprints.org preprint supplement (doi:10.20944/preprints202210.0323.v1), 2022-10-21
Supplement: Supplementary file 1 [file Supplementary table 1.xlsx]

## Sheet: DRB
Supplementary table 1A
gene name	sequence
AtDRB1	MTSTDVSSGVSNCYVFKSRLQEYAQKYKLPTPVYEIVKEGPSHKSLFQSTVILDGVRYNSLPGFFNRKAAEQSAAEVALRELAKSSELSQCVSQPVHETGLCKNLLQEYAQKMNYAIPLYQCQKVETLGRVTQFTCTVEIGGIKYTGAATRTKKDAEISAGRTALLAIQSDTKNNLANYNTQLTVLPCEKKTIQAAIPLKETVKTLKARKAQFKKKAQKGKRTVAKNPEDIIIPPQPTDHCQNDQSEKIETTPNLEPSSCMNGLKEAAFGSVETEKIETTPNLEPPSCMNGLKEAAFGSVETEKIETTPNLEPPSCMNGLKEAAFGSVETEKIETTPNLEPSSCMNGLKEAAFGSVETEKIETTPNLEPPSCMNGLKEAAFGSVETEKIETTPNLESSS…
AtDRB7.1	MEDQETKRITKKPSRSIIISLKDIPPLDPSSIPSMKPMAQDHHNVGMQRFQEKTDFKFEEEDNAISSFSNIQIDPNSTRSISLEKKLAPKPDEEHTTTTKPISKDDESKTRRGSAKSVLHEMCASKRWRPPVYECCNVDGPCHLRLFTYKVMVEIRDSSGKTVLECFGDPRRKKKAAAEHAAEGALWYLEHVKTKPHQ*
AtDRB2	MYKNQLQELAQRSCFNLPSYTCIREGPDHAPRFKATVNFNGEIFESPQYCSTLRQAEHSAAEVALNALSNRGPSHSLAARILDETGVYKNLLQEIAQRVGAPLPRYTTFRSGLGHQPVFTGTVELAGITFTGDPAKNKKQAEKNAAMAAWSSLKQLAKETSSSMPEPENIDELEQVIIARALINYRIKENIGTGSSSSAPVPFAKKFFMQNLRPTSPQPSPATTSRILPFICPKQPSRSSRSSLAATSGIDRIMAAALESRSYQRPQQRFANPPYVPMRQFRSQCHGMAPPVTIRTAVPVFSAPPMPPPPCTNNTQLPSSVYVPSLMRTAPPVRIAPPVTIRTAVPVFASAPPVRIRTAVKPTVEAGETRISSVQEKESIPVLPDSLEIGVEGSTITIT…
AtDRB3	MYKNQLQELAQRSCFSLPSYTCTREGPDHAPRFKASVNFNGEIFESPTYCSTLRQAEHSAAEVALSALSSKGPSKSLTARVLDETGIYKNLLQETAHRAGLDLPVYTSVRSGPGHIPTFSCTVELAGMSFNGESAKTKKQAEKNAAIAAWFSLRKMPRLDPLRGEEKEQEIVARVLSRFRPKEVKRREPNQSRRRTVIRTIRQNTTTTTTTTGDLLCEKLRSINLYTNEASSSSPPPQRFWPSRTNLTQEQSKVKSLLEKCQEYAEKKQSLDDPKPEMRIKTSSPSPLSSSVERNCYSKLLPFPSFVLNHQKLAPAVHIRSVIPVCSAPPPKPNPNPNSSPFITRELGNGSQEKKSLPN*
AtDRB4	MDHVYKGQLQAYALQHNLELPVYANEREGPPHAPRFRCNVTFCGQTFQSSEFFPTLKSAEHAAAKIAVASLTPQSPEGIDVAYKNLLQEIAQKESSLLPFYATATSGPSHAPTFTSTVEFAGKVFSGEEAKTKKLAEMSAAKVAFMSIKNGNSNQTGSPTLPSERQEDVNSNVKSSPQEIHSQPSSKVVMTPDTPSKGIKVNEDEFPDLHDAPASNAKEINVALNEPENPTNDGTLSALTTDGMKMNIASSSLPIPHNPTNVITLNAPAANGIKRNIAACSSWMPQNPTNDGSETSSCVVDESEKKKLIMGTGHLSIPTGQHVVCRPWNPEITLPQDAEMLFRDDKFIAYRLVKP*
AtDRB7.2	MDLPPPESSSNPISSFSVAQKRMLLQRCESKFKIRKLNDTVEEDNVTQMEPNFTLENTLVSEPEADLRPHTTEPTTEEETQRSSAKSQLYNLCSVRHWKAPLYEYIAEGPCHMKIFTGKVTVEMKEDSRITVLECFGNPQYKKKIAAEQAAEAALWYLKNVGYTLQTEKASGRKGRSKPISKMMVTGEPV*
AtDRB5	MYKNQLQELAQRSCFNLPSYTCIREGPDHAPRFKASVNFNGEIFESPTYCSTLRQAEHAAAEVSLNVLSSRVPSKSLTAKILDETGIYKNLLQETAHRAGLDLPMYTSVRSGSCHFPGFSCTVELAGMTFTGESAKTKKQAEKNAAIAAWSSLKKMSSLDSQDEEKEQEAVARVLSRFKPKEVRRRETTNQWRRRTSQQDSNKDLLIERLRWINLLTNQASSSSSTSTPNQHKNSSFISLIPPPPPPKSSKILPFIQQYKDRSSQEAKTETATEMINSKAKVNETSTRLSKQMPFSDMNRYNFVGGCSVNPYSLAPAVQMRSVIPVFAAPPPKPNPNLNPSSLSSSVNEFTSSNNSCSVLNTPGLGGQEKKNLTREMIKLGSESRILDQTHDS*
CsDRB1	MPTNEGFSGVSNCYVFKSRLQEYAQKAGIPTPVYETIKEGPSHEPWFRSTVIVDDVRYDSLPGFFNRKAAEQSAAEVALVELAKLGKVNECISQPIHETGLCKNLLQEYAQKMNYAIPLYQCRKDEASGKVQFSCTVEIGDIRYIGGAAKTKKEAEIKAARTALLAIQSSASELSGNSAGNTQLTVLPSRKRGPEVANNPEETVNVPKAKKGRFKKKILKMKRPGGRMDRTQLQNTGNMENINASQEGSKVSQANTSGIQGVSTEVLAVEGTMDCQEGRSEIEPIEREMPAVNDALPHHIGGDSETIHSAATHCSDRSSNEASEMGTSSLAKEVNEVTPGVGTSSVSCHTTALAKEVNEGTPNEGTSTALTEEVNEPSGIMEAASMTNNSTLGQIESSC…
CsDRB2	MYKNQLQELAQRSCFNLPSYTCIREGPDHAPRFKATVNFNGEIFESPHYCSTLRQAEHSAAEVALSSLSHRGPSPSLAARILDETGVYKNLLQEIAQRVGAPLPQYTTIRSGLGHLPVFTGIVELAGIAFTGEPAKNKKQAEKNAAMAAWTSLKQLAKETASSSSEPETNDELEQITIARALLNYRLKEKMAMASTLDSPIPFARKFPVQNTRPTSPQPPLATTSKILPLFCPKTASRHRPASSGANEKPAQPQPYGSEGRVVRPQKFPAAGAAPYVPIRQYRTSCRGIAPPVTVRTTVPCFSAPPHPPPSALPPQMMRAPAVRIAPSVTVRQAVPVYAAPPVHRDDSLTVRKEDPPTTPAPAQKVDSWTVFPPAILKDLPTVTAAAIQKEDTPTVTPA…
CsDRB3-5.2	MYKNQLQELAQRSCFNLPSYTCIREGPDHAPRFKASVNFNGEIFESPSYCTTLRQAEHAAAEVALNVLSTRGPSRSLTARVLDETGIYKNLLQETAHRAGLNLPVYTTVRSGPGHVPIFTCTVELAGMNFTGEPAKTKKQAEKNAAIAAWSALKRMPNLDSLTNKETDKPEEQDQAIVARVLSNFRAKDDNRNNNARRRDQSQARRRVVCRSHRDNCSAASSTSGNSSQYQQHWRLLDMLMDSALAVPTQKQSSYVSLVPPPPPRSTSKILPPITSLCPANIPIPALAKLDEHHHQGDHEEDWLFGKQDAIIKKPFEKEDSSSIIVHGTKSSIQKPFPQLDTSMLKTSLFDSTSQVGSSRFLGSLNPNPITPTSIRAKSMYTGGFNPQRIAPAVQIRSV…
CsDRB3-5.1	MYKNQLQELAQRSCFNLPSYSCIREGPDHAPRFKAAVNFNGETFESPTFCSTLRQAEHAAAEVALDVLSKKGPSKVLAARVLDETGVYKNLLQETSHRAGLKLPVYTTVRSGPGHGPVFSCTVELAGVSFTGEPAKTKKQAQKNAALAAWSALKKQAKSAFSSSSFSPPSSESGTNDEQDQAIIARYLATLKGPETNNSQREHRTIGVSASIRREVIPYGDARSLNSLQHQNWHCIPFYPELSLYQTCPQERVFRQQENLLALSSLPSSSPRPQIFPFIRSMFQPDHGYYFPSLVEEPVSLVPEIGPFLYFSNRVMPVPVRNVSQVSIQEIEENPRMEEDWRKGDGGSDCWQNNCPSNVPRLSQSEIPNSLVSFNSQSEQRMQEGLQGKGEEKSVSSAP…
CsDRB4A	MYKTKLQELCHQRVWNLPVYTTAKQGLDHNPRFQATVTVNDQSFTTPDLYKSSKEAQNDAARIAFQHFSSPPPPSSTPAASSSNGSSSESAVQVNARETDRTTQVNATISTVNDVHKSRDMQHLYKNQLQSYTQKKNLPLPMYSCEREGPPHASRFKCKVTIDGQTYESHQFFPTLKEAEHEAAKVALMSLSLDKFQQDDSVLYKNVLQELAQKEAYALPVYNTKQSGESHAPTFVSTVEVGGEVFSGQGAKSKKQAEMSAAKVAYMRLKEPNPSQGPALVSPDIQAQADYSSSSLQSNVTADLHHNIQTAGRLVFNPNSMPKVQAEEIRELTTVNTEVAGYDLSQFPQPEFSSSSDLSASSGVEKGMPSSSLPLECTVDPRVDPIAQSVRADGRTCKI…
CsDRB6.1	MAESQRTDIEAVLSSLPQPQLSDPCPTEAQAQAQAPAPAPVQARVQAPATASASKSVTAPVVLTPNRVPEHLMHKNRLQEHAQRSGIPLPVYQSHNEGFQHAPKFRASVSVDGVTYTSPNTFSHRKAAEQDVAKIALECISKKIKDEGCPLINQDTVFCKSILNEFAVKMNLELPAYSTRQSEALLPVFVSSLVFNGVTYTGEPGRSKKEAEQLAARAVIRTLLVTSGSATILSEIIKSKGKLYAALNKVKESNYSTQKIATSYVPTTAIPKSSSGIHPIPTTPEASVGMHSIPTIPEATAGIHPTPAITEASTGMHPTSAAIEVSTGMHSTAADSETSTGMNLPCHPFKKPKLEPPSEPVVLPIPFVPPVLGQHSEGGSSSTNKRRKNKRKANKKLRT…
CsDRB6.2	LPEKHLYKNRLQEYTQKAGLPLPTYRSKNEGFPHVPKFWAQVEVNGKTYASTGRFTHVKEAEQDAARTALEHITQIVKNAGIPTIQDPNYCKSILNEYCAKINLKKPEYTTTFGNEKHPVFISSMVFNGETYKGEVAGSKKMAEQLAARAAIQSLLESGSEVIRQIISSKFNIHKPALGFKDLGTDRSNLQIVVKSGNTVVFLYDQRH
OsDRB1.1	MKKKSAPTPLPPETANTSPAPIGATAGIRVENCYVFKSRLQEYAQKAGLQTPEYHTSKEGPSHEPVFKSTVVINNTSYGSLPGFSNRKAAEQSAAEVALMEIVKSIPANANIPAVQETGLCKNLLQEYAQKMNYAIPSYICTKPASGLAPFLCTVEIGGIQYIGAAARTKKDAEIKAARTALLAIQGQSEGSANGATKYIVVPGKRVGKEVEKRPIETPKPLKAKKGGFKKKWNKRKFMKKDGQAVDVEKDEARVAGDAHDSDVLMQPTVITQEASCGTLFLQPCEEAKRVEDEPPRDIEMVQPDKENQHSDAALVQPDDEARVEQEPSRDISVVQPNEEAISAKQEPSIDAATLQPKEEAMKTGCVALVLCLNISVDPPDVIKISPCVRKECWIDPFS…
OsDRB1.2	MDMPPTPLPPETANTSPAPNGATAGIRVENCYVFKSRLQEYAQKTGLQTPEYHTFKEGPSHEPVFKSTVVINNTSYDSLPGFFNRKAAEQSAAEVALMEIVKSIPANANIPAVQETGLCKNLLQEYAQKMNYAIPSYICTKSASGLAPFICTVEIGGIQYIGAAARTKKDAEIKAARTALLAIQGQSEGSANGATKYIVVPGKRVGKEVEKRPIETPKPLKVKKGGFKKKWNKRKFMKKDGQAVDVEKDEARVAGDAHDSDVLMQPTVITQEASCGTLFLQPCEEAKRVEAEPPRDIEMVQPDKENQHSDAALVQPDDEARVEQEPSRDISVVQPNEEAISGKQEPSIDAAILQPKEEASSVKQEPFIDTAMLQACKEAGSVELGPARDTVISQLNEQD…
OsDRB1.3	MDMPPTPLPPETANTSPAPNGATAGIRVENCYVFKSRLQEYAQKAGLQTPEYHTFKEGPSHEPVFKSTVVINNTSYDSLPGFFNRKAAEQSAAEVALMEIVKSIPANANIPAVQETGLCKNLLQEYAQKMNYAIPSYICTKSASGLAPFICTVEIGGIQYIGAAARTKKDAEIKAARTALLAIQGQSEGSANGATKYIVVPGKRVGKEVEKMPIETPKPLKIKKGGFKKKWNKRKFMKKDGQAVVEKDEARVAGDAHDSDVLMQPTVITQEASCGTLFLQPCEEAKRVEAEPPRDIEMVQPDKENQHSDAALVQPDDEARVEQEPSRDISVVPPNEEAISVKQEPSIDAAILQPKEEASSVKQEPFIDTAMLQACKEAGSVELGPARDTVISQLNEQDR…
OsDRB2	MYKNQLQELAQRSCFNLPAYTCLREGPDHAPRFKAAVNFNGEQFESPGFFTTLRQAEHAAAEVALAALARRGPSYSLAARILDETGVYKNLLQEVAQRVGAPLPSYTTERSGLGHLPVFTCTVELAGITFTGDPAKNKKQAEKNAASAAWSSLRQLVRQEASSSNEPESNDEQEQIRIARALLNYRLKEKMAMANNPHASPFPKKFPMQPERRTAFPQSSHSSYSKILPLFRPKSNSRSRPESPAASDAASQTPFRPTESPNPRSRFPAAEAAPYVPVGHFRMPCHSMAPPVTVRTSIPVFSAPPLPPPGARTQQLPPLMSHPPPIRMASPVRIRPAPPLFTPSAVQGPKPMMPVQIKDVQHQQIKETRSPVMPVQVKDAQNQLLKGSLSPVIPVQIKD…
OsDRB3-5.2	MYKNQLQELAQRSCFNLPSYACIREGPDHAPRFKATVNFNGETFESPAFCSTLRLAEHAAAEVALNELSKRGPSSSLAAKVLDETGIYKNLLQETAHRAGLKLPVYTTIRSGPGHTPVFTCTVELAGMTFTGNPGKTKKQAQKNAAMAAWSELKQLPRVGEPSSSSCPPDHDDDDQEQIIVARTLASLNQTNGGKTPQQKEKQQSSNRPSSRRPSYPKSNASFYGRLHLQKHAYPSVPPEQAMYHMWHQVQATQQKPHFPMVPTMGSTGFPPPPTVLHMYPPPRGQFTMPSSQDGLGLIPCYPEASPVLPRYFSPYPASFVPRRPLPVNVHKIHEKRLVGADMVELPDAAVFSRYTAPDFSGTSENAVQDNKKEEYTESSPASEQESKSHTASSSATRS…
OsDRB3-5.1	MYKNQLQELAQRSCFSLPSYVCTREGPDHAPRFKATVTFNGETFDGPSNCTTLRQAEHAAAEVALARLSLRGPSSSLTARVLDETGVYKNLLQETAHRAGLKLPVYTTVRSGPGHSPVFSSTVELAGMSFAGDPAKTKKHAEKNAAMAAWSSLKQSNIRTTVSPLVFDLVWIVCHGGDVFVVVWCSAGGAQGARRRRRRGAGACGRRQGARRAEAAGRLRRRRWRREGGGGVSTEEASRRRVLFVRHVAVQTSMGASVAAAAGGRTQDTASPAPAAAAASGGVRLPSRRRRAGARAEEGRRAGAHAARRHAARQGGRRNAAADAVLLRAVLPPRRRRRPDEALRRRRRVPRAAGGERPFSDPGLRRATVAAAAAAQGGRSSDLIQEGVVVVKTSIQSIA…
OsDRB4A	MYKSRLQELCQQRRWAPPEYTHRCAGPAHAPLFGATVSVNGVEFRTPEDAARSAKEAHNIAAKAAFDHLSSLPLPPPPPPSENQSSYKSQLQIYAQKKGKLLPSYQTIREGPGHASRFKSVVTVDGKAFESPEYFHTVKEAESAAAKLALMSLPQEASSSEQVPVQPLSYKNLLQELAQKHGFSLPVYSTTSDGSVQVPMFKSTVVFQDGSFQGEPANTKKQAEMNAARVAFQHFEDRRKNALSSTVLRGPHLGQGTVHISAGQVKIAEPVFSVPLASTATSHSATGATDRDYHSLGSTNPLPIAKSTNCADVHIQPCEFKDEKPAFPEPKTVLEVMDSSPELTPLEDAYSAPVASTSTVSSSGCGSDPLASASTVNSTGCGSVPLASASTVSSTGCGC…
OsDRB6	MAAATAEPLAVAVAVAHTATAGTDHSPAPLPPPPPHCNYKSKLQEYLQQANKQLPIYCTKCKGEHHQLKFKSTVMVDGEEFSSTFCHRRVKDAEQDAAKVAYDTLLERKETETDDTDVFELIDQDVVFSKSILHEYTTKTKTDQPEYSVTKTEGSVTPYVSSVSFAGHTYTGGAARNKKDAEQKAARAAVKSLLATNYTSMAKIVRSKEKLIRAISPSGYNKGIDSNPTNKKLPFAPIKFTPPSIFKLYDGEIDMLSVPQALFAPLVAAEEPKVRPAAEPASNPSEQAVHVSKKHKDNKVRGPEVKEERVAQ
OsDRB7	MALFRVALLFGFSLLFSFTSLLGSNQCLNSSCFCKGLLCKRKRAKFSDSTVRQQQGIEAAAMDMVMEEAAALSLGVSASKEPVHVATGRVEQSNCGAKHANGTTDNEPARLRLHKICSATHWKEPSYDFEEQGPSHLKLFTCKVTIHVDTFTTTIVECISEPNRSKKAAQEHAAQGALWYLKIFGHAN
PtDRB1.1	MLTNEGFSGVSNCYVFKSRLQEYAQKAGLPTPVYETIKEGPSHEPSFRSTVIVKDVRYDSLPGFFNRKAAEQSAAEVALVELAKAGEINESTSQPVNETGLCKNLLQEYAQKMNYAIPLYECQKDETPGRGLVFKCTVEIGGIRYIGASTKTKKEAEIKAARTALLAIQSSGSDKQSGSSQLTVIPCRKRGVEASFQEEAENVPKPKKARFKKKMLKKKLSRDRINNAQSELTEKLNIVNGQSGSEADQTDKSAIRGANCKLLTMETTMTFQDGKSDTNLNGENI
PtDRB1.2	MPTNEGFSGVSNCYVFKSRLQEYAQKAGLPTPVYETIKEGPSHEPSFRSTVIVKEVRYDSLPGFFNRKAAEQSAAEVALVELAKAGQINESTSQPVHETGLCKNLLQEYAQKMNYAIPLYECQKDETPGRGLVFKCTVEIGGIRYIGASAKTKKEAEIKAARTALLAIQSSGSDKPSGNSQLTVIPCRKRGVETSVQEEMANIPKPKKARFKKKRLKNKLSGDRIDNAQSELTENLDTMDGQSGSETDQTDGSIIRGANCKPLAMGTTMTAHDGKPDTDLNERETSDTKGALTSNDSGNPGSGQSASPNFNQINHGTGAEISAESNAGKGKVTGIIEATSMANTPVLAQIGASNA
PtDRB3-5.3	MFKNQLQELAQRSCFNLPAYACIREGPDHAPRFKASVNFNGEIFESPSYCTTLRQAEHAAAEVALNVLSSRGPARSLTARVLDETGIYKNLLQETAHRAGLNLPAYTTVRSGPGHVPVFTCTVELAGMNFTGEPAKTKKQAEKNAAIAAWSALKRMPNLDSLSSRETDTREEQDQAVVARVLSNFRSKDEVKHAKNRDHNQARRRMVRGHRDSICASSSSTSNNSLQYPHWRLLDLILDSASDGSTQKQNSSFMSLLPPPPPRTTSKILPPTSHIDNPSHFILNRPIPLQVKGKSQVQAPEIPVALEEHLKDEEEWLGTKSDVIKKPIEKEGTSNSNPSSLYASSSIYRPFPFSNTGKPVTSLLDNTSQHESTHISSRIFGSPNPSPMASTSIHTPSNT…
PtDRB3-5.4	MFKNQLQELAQRSCFNLPSYACIREGPDHAPRFKASVNFNGEIFESPSYCTTLRQAEHAAAEVALNVLSLRGPARSLTARVLDETGIYKNLLQETAHRAGLNLPVYTTVRSGPGHVPVFTCTVELAGMNFTGEPAKTKKQAEKNAAIAAWSALKRFPNLDSLSSKEVDTREEQDQAVVARVLSNFRSKDEGRYARKRDHNQARRRMVRGHKDSSGASSSSTSNNFLLWFNTNAEVLLYVSPSSTPTQNKFKDFATALTYRQSISILIEQAYSNTITSLPDNTSQHESTHISSRIFGSTNPSPMASISIKTPSSTHVPRPMFTGGFNPHRIAPAVQIRSVIPVCAAPPSPSRPPQSSSATGAPSHSTFKGVAEVSMLNKTESNPQPSSTEFKNKLQLL
PtDRB3-5.1	MYKNQLQELAQRSCFNLPSYSCIREGPDHAPRFKSTVNFNGETFESPTFYSTLRLAEHAAAEVALNTLASRGPSKALIAGVLDETGVYKNLLQETAHRAGLKLPVYTTIRSGPGHVPVFSCNVELAGMSFTGESARTKKQAQKNAAMAAWSALKRLVQHSTSSSNSSTSPPVEAKRISEEQEQVVIARVLASLQPAELKNSKQNDSQRGQERFFPVCNDLTPPIPTLYPVQCHSWAYPSFSPEMAIYQMWQQEELFQLQNRLLALQIPSVSPGPQILPYMQSILPSDSVLFGPLREQEPVPVGPRITIATSRPLYLADHVVPDPIKGESTVTISEIHEEKPEESLQCSTSVIPDPPVGGNFNAEPRSKDPVDMDDKQMKVELERKVENVQPGDNQTRKF…
PtDRB3-5.2	MYKNQLQELAQRSCFNLPSYSCIREGPDHAPRFKATVNFNGETFESPTFCSTLRLAEHAAAEVALNTLASRGPSRALIAGVLDETGVYKNLLQETAHRAGLKLPVYTTIRSGPGHVPVFSCTVELAGMSFTGEPARTKKQAQKNAAMAAWSSLKRLVQHSTLPSNSSTSSPVEAKRSSEEQEQVVIARILASLQPAEIKNSKQSDSQRGQERFIPVCKDLTPPIPTLYPVQCQGWAYPSFTPEMAIYQMWQQEELFQLQNRLLAFQVPPVSPGPQILPYMQSILHSDSVLFGPLREQEPVPASPRITIATSRPFYLADHHVSDPIKGESKVTIREIHEEKPEEPVQCSTSVIPDPPVVGNFNAEPRLKDPVDMDDKQMKVELDRKDENVQPGDNQTRQF…
PtDRB4A.1	MYKSKLQELCQQRAWELPTYESSRQGQAHNPRFLATVTVNNISFHSPSPSNTSKKAQNDAAKLAYEHFSISRPSPSPSPPVSGSLSERAGAITCLSPGGTSQFNTQDANRTSHINEALAVAKNDESFGGSLSVSTRANSHLSLRGSLQLNTQNANQTPQVNEATTVARNDESSGDMQRLFKSQLQTYAQKRNFALPVYSCERVGPPHSSRFKCKVTVNGQTFESLEYFSTLNKAEHAAAKAALMSLLPNGVEEDESGYKNLLQELAQREGCGLPTYSTNKSGEAHVPTFISTVEIEGEIFTGQGAKTKKQAEMSAAKTAYTALKQRNSSPSPAVLSPACQFQEAPQSSTLLTPACQVQEAVQSTTCHSLAHQGHEALQFSTPSLLADLTAYLQQNIQPK…
PtDRB4A.3	MYKSKLQAVCQQRGWELPTYQVTKQGKDHNPLFSATVTVNATSFSSPSPSSSSKTAQSDAAKLAFNHFSLISSPSPSRSGCWSGSAGGNARLSPRGKLQLNLQAANPTPLSNEAVAVGKNDESFEGCSSGSTGGNARLSPRGKLQLNLQAANPTPLSNEAVAVGKNDESFEGCSSGSAGGNARLSPRGKLQLNLQAANPTPLSNEAMAVGKNDESFEGCSSGGAGGNTCLFPGGKLQLNLQDANPTPLSNEAVAVGKNDESFGVSAGFSSGNAGGNTRLSPGGKLQLNLQVANPTPLSNEAVAVGKNDESFGGCSSGSAGENTHLSPGGKLQLNLQDANPTPLSNEAVANAKNDEIFGGMQHLFKNQLQTYAQKRNFTLPVYSCERVGPPHASRFKCKV…
PtDRB4A.2	MYKSKLQQLSQQRGWEIPKYEVTKEGQEHSPHFYATVTVDATLFSTPFPSSSTKKAQNDAAKLAYKYFSDHPRPSSSSPLNDCSGGSAGENTRPSPGGKLELDIQDANPTPLSNEAGAVAKTDESFGGILHLFKNQLQTYAQKRNFTRPVYSCERVGPPHAIRFKCKVTVNGQTYESREYFPTLSKAENAAAKAALMSLLPNGVEEDESGYKNLLQDMAQREGCGLPTYFTEKSGEAHAPTFISTVEIDGVNFTGKEARNKKQAEMSAAKIAYTARRR
PtDRB6	FQNPLLNMDNPTESELSNPASPSPAPLALAPPPCTTPDLAPHPVTSPDPTPSQAPVPDPTPSPAPVHEPTPSPAPVPDPTPSPAPVHEPTPSPAPVPDPTPNPAPENISFSKKLVKKGLPDNLMYKNRLQEYTQKSSLQLPVYQTLNEGPAHMPRFRSTVWVDGARYRSQKTFLHRKAAEQDVANLALESILKRVKDEGCPLLLGDTVFCKSILNEFAVKVNREKPTYNTVQSPGLLPVFISTLVFDGVSYTGDAGRNKKEAEQLAARAVILSLIGNSGSSKILYEIIKSKSKLYAALDRVKDPSHSQPNIVPVAVKVGHCSETTVDQEQEVSTAVVRDAAPVSANIVPVAVKVGHCSETTVDQEQEVSTAVVRDAVPVSAIPPAASGMHPSHHDSKRP…
PtDRB7	MKYVVEGARAGPKEGLKPAKQFDDEANTTADLLADINPSQIIKTGDDSSTIKNTTKVGEISKDDKNSHNDSGGPKISAKSQLLETLAANKWKPPLFECFKEEGPCHKKLFTYKVAIRIEGEASTVLECFGYPKPTKKAAAEHAAEGALWYLKHLGYFPIKKLRGKNNYL
SlDRB4B	MYKSKLQELCHSKKWALPQYCCMRDGADHNPKFKASVVVNGINFDSLPLRKSSKEAHNEAAKFAFLHFTNEDTVPTKVDGECENLQDRSTSEIKKGGSLPTIEDSGLTKTEEACQHLQDHRNTSEIKQEDSHYQYKKKLQMYAKRKNLGVPVYCNKKMSSAQGLYFEATVTVAGELFKNPGAYKSSEEAEESVAQFALMKLVTVDLEKSNTGSYKSFLQELAQQEEICLPRYKTIGAGEPHNLTFFASVEIEAEIFHGDGAKSKKQAEENAAKVAYTALTKCKSIYAGNPSTVSAESEGEIVKTERIMESLSIFISEEKFRDEEEIVYSKSTSPKSIGADIVNASSLTLGVQELSVNEKTPSSVESLLHLPSKTTPSKSPTVSNADSSARRTAETESYL…
SlDRB4A	MYKTKLQELCHQFEWNLPEYATEKDGPDHNPRFTATVVVNGVSFESPKDQCRSSKEAQNHAAHIAYDHFNLPQRRNLPSSAPGNIYMVKSRTSAFHESREGRSSSREKCGNFWTIPDIEIGYLVG*
SlDRB6A	MLHLYKSRLQHYAQKQNLTLPVYSSELDGPPHARRFRSKVTIDGVTYETQEFFSTLKEAEHAAAKVAFESLALNDTQEDEGLYKTLLQELAQKEALLFPVYDTARTGPPHAPVFRSMVEVGDRTFQGQEAKTKKQAEMNAAKVAYNALVKGGQLDEPLQVLPVSSKCVVADVSLLVVQQKTKLIIEELSLQNEEADTNAKRHRCSSAPNTYSLIRDHRPAAPFVASDSSDAVAESADSDTYAGTSILPSEKIFIFPRKANMNLPSGASVLPCSDEKWVAASLELNQNH*
SlDRB7	MEEVNTVTQSSEQPIEMAEVNTVTKCSEQPIEMTEVNTVTQSSEQPIKMAEVNSVTQSSEQSIKMAEHVIIQNPQPNISETEKGRRRYIHVEFIHKNRLQELTQRSSLGRPVYHTVNAGPPHAPLFRSSVLVDGVWYTSPNTFSHVKAAEHDAAKVALIGVKEKLKHEGCPLIRYSVLQVYPK*
SlDRB1	MANNESIRSMTSCYVFKSRLQEYAQKVGLPTPVYETIKEGPSHEPTFTSTVIVDNDRYDSLPGFYNRKAAEQSAAEVALMSLGNSGSVENLSQPVHETGLCKNLLQEYAQKMNFAIPQYECERYDSESKIISFTCTVDVGGMKYIGAAARTKKEAEIKAARTALLAVQSSGFAPNYSSYTVVPMKKVTDLAISNQESAAALKPKKHRFKKKQTRNFSDVSYHVRTKIFGDSEVQMVNQAKPEMHENAAVMTPGTGSGPAPFAGTMGDLVPSNNLSSDYGTSNIGINSQCGGGVTTEGNAVIGVDYGTSKIGINSQCGGGVTTEGNAVIGVEQVTLEVAPVAWNDNLHVQDLHLLHENAAVMTQGTGSGPAPFAGTMGDLVPSNNCGSDYGTSNLGINSQ…
SlDRB2B	MYKNQLQELAQRSCFNLPSYTCIREGPDHAPRFKATVNFNGEVFESPNYCSTLRQAEHSAAEVALNSLSNRGPSNSLAARILDETGVYKNLLQEVSQRVGASLPAYTTFRSGLGHLPVFTCTVELAGVTFTGESAKNKKQAEKNAAMAAWSSLKLLAQQSESAKPDRRRNDEQEHVTVARALQRYILKARAARVSFPIKFPTPNPRPSSVQQLSSTTSKLLPLICPRTAPRSRPVSPLCLKPASQSRPIDNTGSDASLSPRTAQTINNILKDSFAMDSHRVRPEKFPAAGAAPYIPVRHFGPHHRMAPPVTIRNAIPVFSAPPLPQSSQPPRVMRPPGLGVAPPVCIRQAVPVYAAPPVRAEELSTLDRVMRHSGLGMAPVYAVPSVPKAPLLVDEPLA…
SlDRB2A	MYKNQLQELAQRSCFNLPSYVCIREGPDHAPRFKAVVNFNGENFESPHYCSTLRQAEHAAAVVALNALSNRGPSHSLAARILDETGVYKNLLQEIAQRVGAPLPQYTTYRSGLGHQPVFTGTVELAGITFTGEPAKNKKQAEKNSALAAWSSLKQLAQQDASLSSELENNDEQEQIRIARALLNYRLKEQLEMAKSGKVQIPFQKKFPIPSPRPSSPQRPAVTSSKILPLICPKTVNRYRSSSATINDSHSSLSQPLPQSQASSSEGRTVSTRISHAPGAAPPYMPVRQYNRTPYHGIAPPVTIRTAVPVFSAPPRPQPTGCPTQMMQARSVRVAPPVCIRQAIPVYATPPAKKETVAHATTTASRPSSQPEEAMARATIAPSRPLAQPKETGTNAGTE…
VvDRB3-5.3	MFKNQLQELAQRSCFNLPSYACIREGPDHAPRFKASVNFNGEIFESPSYCTTLRQAEHAAAEVALNVLSTRGPSRSLTARVLDETGVYKNLLQETAHRAGLNLPVYTTVRSGPGHVPVFTCTVELAGMNFTGESAKTKKQAEKNAAIAAWSALKRVPNLGSLSHLSKEAESREEQVVVARVLSNFRSKDESRPIRRWDQNQARRRMVRGHGGSGSSSTSNNSQQFQKWRPMDLLMDSVPEGGTAQNQNCFVALLPPPPPRTASKILPPISPRDTLSLYPSTRPIPVQAIGRSQVKMPEVPTLLEEHQRDEEEWLDGKSNLIRKPTEKECPSNANASSVYGANSIYRPFPLPNAGKLNTSLPDSPHQPHEQTHIKNNPFGNPTPSAMKGSAGIHIPRTMG…
VvDRB3-5.2	MDNVRIEFSSLFLYFLRDQRWAAYGMYKNQLQELAQRSCFNLPSYSCIREGPDHAPRFKATVNFNGETFESPSFCSTLRQAEHAAAEVALNTLANRGPSKALAARVLDETGVYKNLLQETAHRAGLNLPVYTTIRSGPGHVPVFSCTVEIAGMSFTGEAAKTKKQAQKNAAMTAWSALRKLSQRGSPSSPSVESECNEEQEQVIIARVLASLRPSKSNNKQNDRQHGQQRSGSICRDSTPQTPISCSMQYQSTVDPSFFPEMAMYQMWQQEQLAQLQNRLLALPVPLAPQPSPHFFPFMQSMFRPDHCLYFPTEVQQPITMGPRFSIAASGSSFYLSNHLVPEPMRGRSMVTIQEIEEKTEERSEFSPSEVSVSPALGDNNTEAINQEPIQEDNKQNTE…
VvDRB6	MSEAAKVDCPAPSSTRLPEHLMHKNRLQEYTQRSAIPLPIYQTVNEGFQHAPKFRSTVLVDGATYTSPNTFSHRKAAEQDVARLALEFISKKIKDEGCPLIREDTVFCKSILNEFAVKMNLEKPTYTTVQPEGLLPVFVSSLVFNGVTYTGDAGRNKKEAEQLAARTVILSILGNSGSGTLLSEIIKSKVKLYAALHRVKDPSYIHTGILPIGLTSGIPPCKGKEVEVAPGTDQLLPTAVSVPLSGQLVHVPVTHPPVHELEKPKPNVSSEVIAPPISFVPSVFEQPLVVSPTTGRKRNRKNKKKANKKLRTDAQLPVAVLPLNQASPCSVAQ
VvDRB3-5.1	MYKNQLQELAQRSCFNLPSYACIREGPDHAPRFKATVNFNGEVFESPTFCNTLRQAEHAAAEVALNVLSKNGPSKALAAKVLDETGVYKNLLQETAHRAGLKLPVYTTVRSGPGHIPVFFCTVDIAKMSFTGEPAKTKKQAQKNAAMAAWSALKRLSQASSSTSSAPLESGGNDELEQVTVARYLASLQPPEANKSAQRDGLLGQGSTPCRRDLMPNDNAISLYSMHCRDWSHSAPLIQLAHQSWPKERASQQQNHLLALPSAPTTLPRPQMSPIIRSIFQPDHGPCFLPREQEPAPLSPGIGPFLYFSNGSMPVPVSNLSQVTIQEIEEKPKVEQEWLNVDANSGCWKINFPSNLSGLSLVEIPKCPISPNSHSEPIQEALQGKEEENSAGNSAQLGT…
VvDRB4B	MNKTRLQELCHRKRWNPPEYSTRKDGPPHNPTFIATVSVGGLSFSTDHPARSSKEAQSNAAGLAIQYLTDPKPPPLADSSSVITDVKNIPATKGTSQPEIQATSQSHQAHEAFLVTRDDKKLGFLSFRVYREEQGIKFMAMENKNKEKNDEKKKGWKP
VvDRB1	MSSNDGFAGVSNCYVFKSRLQEYAQKVGLPTPLYDTIKEGPPHVPSFKSTVIVNDVRYDSLPGFSNRKAAEQSAAEVALVELAKSGNMKECISQPVHETGLCKNLLQEYAQKMNYAIPMYVCQKDESPGRAASFSCTVEIGGIRYIGAAARTKKEAEIKAARTALLAIRANTDGVGEKSIGNTQLTVIPGKKKGPESGNPDEPAKALKPKKARFKTKGLRKKFPGNKVGNDQVEDTRGMEVDIDNQVGSELLQTDASMVQVAESGLLSMESKENFEEEKSIVNQNGGDKTVAEGDPIPDIIGNCQNGQATASDIKKTDHKAPPELGISSMSPAEVLVSVAMEVNNVSEAGLVDSAIMNSSNEDQTEAASAAKDFKQMGANEDDFKSNGASALGIVASNLG
VvDRB4A	MIIWAANLEHIFPCMQHLYKTQLQTYAQKRNLPLPMYSFESIGPSHNCRFKSKVTIEEQTYESPDFFPTLKDAEHAAAKLALMSLSPAGFQEDDYGVYKNLLQEMARKEGYQLPVYSTEKSGVSHMPTFLSTVEIEGETFVGQKAKTKKLAEMNAAKAAYTHLKER
VvDRB2	MYKNQLQELAQRSCFNLPSYTCIREGPDHAPRFKATVNFNGEIFESPNYCTTLRQAEHSAAEVALNSLSNRGPSHSLAARILDETGVYKNLLQEIAQRVGAPLPQYTTFRSGLGHLPVFTGTVELAGITFTGEPAKNKKQAEKNAAMAAWSSLKQLAKEAANSSSETENNDELEQITIARALLNYRLKEKMAIANSPSGTLSFPKKFPIQNSRLFSPQLPPVATSKILPLICQKTPPRNRPPSPTANDGSMPSSQPRSRPTSTTSSENPVPPSQPLALDVRAVRPQRFPAAGAVPYVPIRQFRTPYHGIAPPVTIRNAVPVFSAPPSGLPPQVIRAPHMRIAPPVCVRQAVPVFAAPPVRKEDPLVVRKEDPSAASLPSLPTKSPAHVEETGSATANDL…

## Sheet: RDR
Supplementary table 1B
gene name	sequence
SIRDR1	MGKTIQVFGFPYLLSAEVVKSFLEKYTGYGTVCALEVKQSKGGSRAFAKVQFADNISADKIITLANNRLYFGSSYLKAWEMKTDIVQLRAYVDQMDGITLNFGCQISDDKFAVLGSTEVSIQFGIGLKKFFFFLSSGSADYKLQLSYENIWQVVLHRPYGQNAQFLLIQLFGAPRIYKRLENSCYSFFKETPDDQWVRTTDFPPSWIGLSSSLCLQFRRGVRLPNFEESFFHYAERENNITLQTGFTFFVSQKSALVPNVQPPEGISIPYKILFKISSLVQHGCIPGPALNVYFFRLVDPRRRNVACIEHALEKLYYIKECCYDPVRWLTEQYDGYLKGRQPPKSPSITLDDGLVYVRRVLVTPCKVYFCGPEVNVSNRVLRNYSEDIDNFLRVSFVDE…
SIRDR2	MGVEKRATATVRVSNIPQSAIAKDLSNFFDSLIGKGSVFACDIHSEHKNWKSRGHGRVQFETLQDKLHCLSLAEQGNLLFKGHQLSLVSSFDDIITRPVEPKCRFQAGILHTGLLVEKDVMQVLETWEDVKTLIMPERKCLEFWVSHAEECYRLEVQFGDVTEGTLCSVENQKSALLLKLKHAPKLYQRVSGPAVASKFSADRYHICKEDCEFLWIRTTDFSNIKSIGCSSSLCWETEDGWLSSDLFSSLPCCNQDVIDLDLDKVGDIYSGSEFVPLVRIPSDLKLPYEILFQLNSLVQTQKISLGAINPNLIEVLSKLELDTAMMILQKMHKLQSICFDPLLFIKTRLHVLGKNNKNRPSSSYSRLVNHSMMSVHRVLVTPSKIYCLGPELETSNYIV…
SlRDR3a	MAEFYSHNDEEVELPSSVQQMINQICKKERQNSPDDTVRRLLVAIGEERSLYILNEISKCQIKKTLSGFIVFMAKKYYQSETQQFYQKQNHEQPVLSAESFYHSPQIRRNSLSSPNSSCSSVNFSPRNRPIFQDRDIVGDTSDSPTSGPRIPSPPLSPVTTSFQKCHYDPSPSKFRDRASTRGISEQLLALNKLEFRKFFLILNYIGRRKVEDVITLHDVGDILDMIYQPMSHFESYIWNKYGHLCEHNKRVQYLDWDSGRTHLYHCHVHSDRSYTFKGPYLKAERTHLQHSLGDENVLIVKFEQNTPGCPEEIVQNGILVGLRRYRFFVYKDDGKKRRLKDKEEKIDSVKCYFVRMESLNPYENETYILHDKMVHEARCNFMHVHMVSSMAKYMARFS…
SlRDR3b	MISLPESVNFVDIVDLDDVNVERRVSVSRNRKPPLLMQCRLFFNGCAVKGTFLVNRKIGSRKIHIRPSMVKVEIDPTISSIPTFDSLEIVAISHRPNKAYLSKNLISLLSYGGVHKEYFMELLGSALEETKQVYLRKRAALKVAINYREMDDECLTARMISSGIPLNEPHLHARLSRLAKIERTKLRGGKLPISDSFYLMGTADPTGVLESNEVCVILDNGQVSGRVLVYRNPGLHFGDVHVMKARYVEELADVVGDAKYGIFFSTKGPRSAATEIANGDFDGDMYWVSINRKLVDSYTTSRPWIRMHSTPNAVSKKPSEFSADELEYELFRQFLEAKSKGANMSLAADSWLAFMDRLLTLRDDNVDDMHSLKGKMLHLIDIYYDALDAPKSGKKVSIP…
SlRDR6a	MGSEGSEKNLVVTQISVGGFSNDVNAKMLSEYLEEQVGQVWRCRLKTSSTPPDSYPTYDIDVEKVRRMNNYIKVEPHAFVHFASSESAQNALAAARRDELFLEEKPLKVSLGPENTFNMNERRRTFMPYKFSDVGVEIGVLVSNDDFVVGWRGPHSGVNFLVDPFNGKCKILFTRDTAFCFKGEGKHAVIKCNFKIEFLLREINEINECKDFSSLVLLLQLASSPLVFYRTADDDIEESVAFDLLDDDDQWIRTTDITFSGAIGRFNTYRVSIRPRNGPSFKKAMNYFRESRVPVVEQGEQMLRVRNEPDFGESVSEPFFCFQNHEGISFKVLFLVNAVLHKGIVNQHQMTAEFFSLLRKHQEGVNLAALKHIFSYKRPVNDAIRKLASVQKWLFNNPN…
SlRDR6b	VVTQISVGGFDNDVNAKMLSEYLEEQVGQVLRCRLKTSSTPPKSYPTYHIDEESMQRMNDYIRVEPHAFVHFASSGSANYALAAAGRNELILGGKPLKVSLGPGNPHCLDKKRTDEMPLKFSDVNVEIGGLVSNDDFVVGWSGPPTGVNFLVDRFDGTCKILFTKNTVFSFKNEARQAVIKCNFKIQFLTREINEIKECKDFASFVILLQLASSPLVFYRTADDDVEESVAFDLLDDDDQWIRTTDITCSGAIGRFNTYRISIRPCNGLNFAKAKKYFRDSRVPVVEPCNQRLRVRNEPNFGVPMPEPFFCIQYHDGISFKVLFLVNAVLHKGIINQHQMTNDFFTLLNKHQEGISVAALKHIFSFKRPVNDAVKKLEHIQTWRLVITPTKAYCLPPTV…
AtRDR1	MGKTIQVFGFPNGVSAEEVKKFLERLTGSGTVYAIKVRQPKKGGPRVYAIVQFTSERHTRLIITAAAERLYYGRSYLKAFEVEQDIVPKPRASLHTISGLKMFFGCQVSTKKFLTLWSAQDVCVSFGIGMRKLHFSFSWYQKDYRLELSYENIWQIDLHSPQGRSSKFLVIQVIGAPKIFEKEDQPINLLFGIMDFYSDGSDEQWIRTTDFTSSSCIGQSTAFCLELPVHLNVPDFRENFANYAEHRASSFLIESGSSYSSNANTLVPVVDPPPGFSLPFEILFKLNTLVQNACLSGPALDLDFYRLLNQKKYDRALIDHCLEKLFHLGECCYEPAHWLRDEYKKWISKGKLPLSPTISLDDGLVYMYRVQVTPARVYFSGPEVNVSNRVLRHYSKYIN…
AtRDR2	MVSETTTNRSTVKISNVPQTIVADELLRFLELHLGEDTVFALEIPTTRDNWKPRDFARVQFTTLEVKSRAQLLSSQSKLLFKTHNLRLSEAYDDIIPRPVDPRKRLDDIVLTVGFPESDEKRFCALEKWDGVRCWILTEKRRVEFWVWESGDCYKIEVRFEDIIETLSCCVNGDASEIDAFLLKLKYGPKVFKRVTVHIATKFKSDRYRFCKEDFDFMWIRTTDFSGSKSIGTSTCFCLEVHNGSTMLDIFSGLPYYREDTLSLTYVDGKTFASAAQIVPLLNAAILGLEFPYEILFQLNALVHAQKISLFAASDMELIKILRGMSLETALVILKKLHQQSSICYDPVFFVKTQMQSVVKKMKHSPASAYKRLTEQNIMSCQRAYVTPSKIYLLGPELE…
AtRDR3	MMNNGCDEVSPRSEIALLGSVETMLEKIYEKHNHRLPISVETRRKLSSISEELALETLRKVFNKPYLKTLDGLIMYFVKGTVTVDGSPRLSPGESPVQSPRTPAKKSCRASQDVSLDLETPSPKFMKREENGGSKYIPPLLALGELEFKKAFLLLSYIGGESLVEEVISGDQIRKWKDLPMVSYEAAVWNRLGQRYCSPKERRRPLEGDSGMTHYYQCHVATDGSYKFKGHLLENTGTHLHKVLGDDNVLTVKFDKVLGVETYCNDLYSTYKGIAKNGIMVGLRRYRFFVFKDGGKEEKKKDVSTKGVKCYFIRTDSTASIDMQNPYIFAGKSMHEARMHFMHVNTLSSLPNYMSRFSLILSKTKTLEVDMTGITFEQIDDIHCHDQDDKDVLDKNGKP…
AtRDR4	MMTTTMDYNSSDQGFSWSEIALLGSVETMLEKVYGKHNHHPPIKVETRRRLSSISEELALETLRKVLNMPNVKTLDGIIIYFLNDAVTVDGSPRLWSGESPVQFPRTPGKKSCRASQEVSLDREDPSPKFLRGDENGESKHISLLLALGELEFKKAFLLLTYLGGKSLGEVISGDEIRQWKDLPMVAYERAVWFKLGQNEERMQLESDSGKTHYYQCHVAPDGSYRLKGYFLENTGTHLHKVLGDDNVLTVRFDQLPKESTYCDNPYSKYKEIAKNGIMVGLRRYQFFVFKDGGKAEKKKRNSTKQVKCYFIRTGSTASSDMENPYILSGMSIHEARMHFMHVHTLPSPANYMARFSLILSKTKKLEVDMTEITVMQIDDIHCHDQSNNDVLDKNGKPR…
AtRDR5	MNQASSRIRIALSGRIETALENIYRKHNLTPINDETRQRLSSIPENLGFELVRKVFSLQAGLIYNLDSFIVSKVNQAVSFTGYPQPANSLSPSGRHVSRVLQEEMSVDSDAPSPKSLKSEDKGGSLHIPQLVALGELEFKKVFLLLSYIPGQHVGQVITADEIRLWKDLPMVEYEAAVWDRLGRHYCPQKDRRMLQWDSGKTHYYQCNVAPNGSYTFKVLSALQGPLLEHTGTHLHKVLGDDNVLTVKFADVQKSSSTYSIDHYFTYKGIAKNGIMIGLRRYQFFVFKDGGKEEKKKDLSTKKVKCYFIRTDSTAFYDMQNPYILTGKSIYEARMHFMHVHRAPTLANYMARFSLILSKTKTLEVDMTGITFDQIDDIHCHDQDGKDVLDKNKKPCIHS…
AtRDR6	MGSEGNMKKSVVTQVSIGGFGESTTAKQLTDYLEDEVGIVWRCRLKTSWTPPGSYPNFEIADTSNIPSIDEYKKVEPHAFVHFAVFESAGRAMDAAGQCNLILDGQPLKVSLGPKNPYSLNQRRRTTVPYKLAGITLEIGTLVSRDDFFVSWRAEGVDFLVDPFDNTCKFCFRKSTAFSFKDAVMHAVINCDYKLELLVRDIQTVRQYKTLHGFVLILQLASSPRVWYRTADDDIYDTVPGDLLDDDDPWIRTTDFTQVGAIGRCHSYRVLISPRYENKLRTALDYFRMRRVQEERVRWPPRIRNEPCFGEPVSDHFFCIHHKEGISFEIMFLVNSVLHRGVFNQFQLTERFFDLLRNQPKDVNIASLKHLCTYKRPVFDAYKRLKLVQEWIQKNPKLL…
OsRDR1	MMDWFMSTVYFYGPEINVSNRVVRNFSSDIENFLRISFVDEDCEKLRATDLSPRSASGHDANRTALYKRVLSVLSDGITIGGKNFEFLAFSSSQLRDNSAWMFASRQGLAASDIRTWMGDFRNIRNVAKYAARLGQSFSSSTETLKVQKYEVEEISDIKNGTQHVFSDGIGKISSAFANEVAMKCNLKRFAPSAFQIRYGGYKGVVAVDPTSRWKLSLRKSMLKFQSDNITVDVLAYSKYQPGFLNRQLITLLSTLGVRDSVFEQKQEEAVNQLNKMVTDPQAAIEAIELMPMGEITNAVKELLLCGYQPDDEPYLSMLLQTFRASKLLELKTKSRILIPKGRAMMGCLDETRTLKYGQVFIRATSGVNDNDRFTVTGKVVIAKNPCLHPGDIRILHAV…
OsRDR2	MPTAAAAATASLRVSNIPPSAVAAELLAFFDSAVAVAGGAFACEIAAAHRGWLSRGHGTVQFGSAAAAAAAAGLASSGRLPRFLGALLSVSPSPVDLLPRASDLSLRAAGAGLVVGDRVAERVFEAADAWDGVRAEVIPGKRRVDLYLEHDSQRYKLEVLFEDMKDCLGCTLDGMGAILLQLNYAPRIHTAISGPAVNSRFMDDRFHACKEDAKFSWVRALDFTPNYSFGRCSTLVLKLGKSALVSDILKSLPFSGNLGELTMNSMDGVGASSNVVPLVHCPRDYSVPYEVLFRLNSLMHMGKIVAKHVNADLFKALQELPVDVSRRIFEKMHKLESTCYGPLQFIQQEAYSMKRSHNVLLSNEGEGEGERKLMKCYRVNITPSKIFCFGPEEEVTNYV…
OsRDR3	MEDSMSARMILSGIPLEESYLQHRLDFMAQQERKGIKQGKIPIDECYYLMDTTDPTGTLRPNEVCVILENGQFSGDVLVYKHPGLHFGDIHVLKATYIRDLEKEYVGYAKYAILFPISGPRSLADEMANSDFDGDIYWVSKNPKLLEHFKPSEPWVQAIKPKKTKQKKPQDCNESKLERLLFHEFLKTRFTPSFALGTAADSWLAYMDRLLTDSLDEIEKKLIEEKMLKLVDLYYLALDAPKTGNKVNIPSDLMVKQYPHFMGRSFSYHSSSILGQIYDKAEDVESLRSCNVQPIGVSLLPCFMEREAPPAARHLWQHRYEEYLTDSTMLYRAMVDKEERNMKFQELYEKYKHMLYDASEFEQTQRDPDDVFSEACVIYQIVYEKARWSNDASRCGFAW…
OsRDR4	MGSNNTTEYPLLIQLRLFYNGSAVKGTVLVDKRLPPRTIHIRPSMLKIKTYPELSGVQSVNSLDIVSARNAKKSLSGVQSVNSFEIVSTSNRSGRTFTSNNLIALLHYGGVPEEFFMELLQTAIEEADNARFDYAGALNIAFNYADMEDSMPARMILSGIPLEESYLQSRLDFLSLLERKGIKNGKIPIDDCYYLMGTADPTGKLGPNEVCVILDYGQVSGDVLVYKYPGLHPGDIHVLKATYSSDIEKVVGNSKHAILFPTTGQRSLADEMANSDFDGDIYWVSLNPKLLEHFKPSKPWVPAITPNGTKQKGPEDFNESELERVLFHEFLKTRFAPSYARATAATNWLVYMDRLLTVSLDESEKKLIEKKMLKLVDLYYLALDAPKMGNKVNIPRDLM…
CsRDR1a	MELPYRLELPDFKENFAYYKESEDRFVLETGSAYSRSLDLVPIVGPPDGIALPYEILFKINLLVQNGCVAGPLLDSNFYRLVDPYRAPVSISCIEHALDKLYHLKECCYEPSRWLTDQYRKYMTSRSKPSSPAISLDDGLVYVHRVQVTPSRVYFCGPEINVSNRVLRHFRRDIDNFLRISFIDEDLDKIHSTDLSPRGSSATDITRTRIYTRILSTLRNGILIGDRKFEFLAFSSSQLRESSAWMFASRYGLTAAEIREWMGNFREIRNVAKYAARLGQSFSSSKETLSVHMDEIEIIPDVKIEIGKTKYVFSDGIGKVSAEFARKVASKCGLKDNPPSAFQIRYGGYKGVVAADPTSSKKLSLRDSMRKYESELTKLDVLAWSKYQPCFLNRQLISL…
CsRDR1b	MEYIEHALETLFHLRECCYEPVRWLEEQYRKYVLSRRFLTSPAVALDDGLIYVNKVLVTPSKVYFSGPEISLSNRVVRSYPDEIDNFLRLSFVDEDLDKLYSTVLSPLISSTNEERHTTIYERVLSTLRNGIVIGDKKFETLAFSNSQVKDNSMWMFASRPELTAADIRESMGDFRDIKNVAKYAARLGQSFGSSREALHVDSSDIEIIPDVEVEDDGITYCFSDGIGKISAELAEIVAKNCGFTIYTPSAFQIRYGGYKGVVAVDPTSSTKLSLRKSMLKYKSESTSLDILANSKYQPCFLNRQLITLLSTLGIRDHVFEKKQREGVAQLDAILTDPLKAHEALELMSSGENTNVLKELLMCGYKPDVEPFLLMMLQTFRASNLLELRTRTRIFIQNG…
CsRDR1c	MAKMIMLYGFASLASPKAVKEFLEEHTGEGTVSGVEVGQNKGSRAHAIVEFTTVEAADFIKCLARERLSYGNSFLKASSAKRRTPHFAKRTPHYKLGGDLKLNFGCQISKDKFSVFWSQENVSVKLCSDLRKFGFFLSYESVDYKLELSNESIWQIELHRPSGHSVSIGQSSAICLELPSRALIPKALKDFFHYKESLVQFTLLPGFVFSCNSDLNQDGKHALEMLFHLRECCYDPVSWLREQYRKHVSSGQFPTSPAVALDGGLIYVNKILVTPSKVYFCGPEISLSNRVVRSYPDEIDNFLRLSFVDEDLGKLYSTVLSPQISSTNGERRTRIYERVLSTLRNGIVIGDKKFETLAFSNSQERENTLWMFASRPELTAADIRERMGDFREIKNVTKY…
CsRDR2	MVLATVWVSNIPQTAIAKDLLLFLESKLGKNSVFALEIITDRSNWKSRGIGRVQFTSLDFKSKAQNLSLNDKLVFNSQNLKISETHSDIVPRPVKAQHRVEDGVLHVGVMCKEERLRVLQTFEGVRGWLLPDRRRLEFWVWPKHNGEWQKGIQECQSDSSDCCFKVEILFEDVLETVGFSLDEGATVNGILFKLKYGPKIYQKVSGPHVASKFPSDRYHICKEDFDFFWVRTTDFSVTKSIGCSTSFFWEIKNGLLASDISNIFPFYKEDKTDLILEEGEEFCTTSEIVPLVKCRPGFNLSHEVLFQLNSLVHNQKVSLVAADAELIQILSGLSMETALMVLQKLHKLKSICYDPVSFVKTQLHVLGRNCKSIPLSSHKRLIDHNVMSCYRALVTPMKI…
CsRDR3	MSDPAVVSQQGVVSLPLSVEQLISKIYTEQNKLPPDDGARRSLASLGEDAALDVLRTIASDKIKYSFSGYINYLVKKRNNNGSPLKRVCFSPSSPQQNRSPVTVTTVRLLNLPQGTDYVVKQSPVADQQPRGSPMSSISHAMRHRASIPQYVALGELEFRKAFLILSYIGENSLEEVITADEIRGMRDLQMARFESEVWEKLGRKNISQEDRRMSLKWDSGKTHMYHCHISTKGNCTFKGPYLNQTRTHLQRELGDDNILLVKFDEELGGHRSSNNWNDSYSKYNEIAREGILVGLRCYHFFVFKDGGKEEKKKDPSTSPVKCYFVRMESSAFIDMGYQYILSGKTVHEARYMFMHVRTVSSVANYMSRLSLILSKTMKLEVDFSRINIERIEDEPCRD…
CsRDR6a	MEPEGREKLLVDAQVSFGGFDRNVKAAELVKYLENEVGGVWRCRLKTSCTPSESYPDFYVTNTAEVRKTDDYEKVEPHAFVHFAMPTYVTRAVDAAGRTELFLNGRALKVSLGPENPFRLNQRGRTSTPFKLPDVCVEIGTLVSRDEFFVAWRGPASGTDFLVDPFDGTCKFCFTRDIAFALKSSTEHAVIKCEFKVEFLVREINLVKQYSEFSCVAILLQLASSPRVWYRTADDDILVLVPFDMLDDDDPWIRTTDFTPSGAIGRCNSYRISISSRHRGKLSKVITYLGERRVQVDSLSRPITIREEPDFEVPMSDPFFCIHYEEGISFEIMFLVNAVMHKGIINQHQLSDSFFDLLRGQSREVNVAALKHIYSYKWPVFDACKRLKLVQEWLLKDPE…
CsRDR6b	PEEREKTSVDTQVSVGGFDRDIKAVDLVKYLENEVGGVWRCRLKTSCTPSESYPNFFIENVAEVQKTDDYEKVEPHAFVHFATSTYITRAMDAAEHMELFLNGRALKVSLGPENPFRLNQRGGTSAPLKLPDVYVEIGSLVTQDEFFVSWRGPASGTDFLVDPFDGTCKFCFTKDTAFALKSSAEHAVIKCEFKVFLVREIDIVKQYSELPRVAILLWLASSPRICYRTAKDDIEVLVPFDLLDDDDPWIRTTDFSPSGAIGQCNSKQRVQEDCLSQPVTIREEPDFEVPVEDPFFCMHYKEGVSFEIMFLVNAVMHKGILNQHQLSDSFFDLLRCQPREVIVTALKHIYSYKRPVFDAYEKLKDVQECLIKNPKLNEGPKNIDDIAEVRRLVITPTKA…
PtRDR1a	MSKTVKVSGFPSSTTAGAVQVFLESHTGGGTVEALKIREIRTGGARKYAIVQFTTTRAAEQIISLANPRLWYGHSYLNARPMDRDIIPQPRSFLHTMESVTLHFGYQTSKEKFSAVWSGNNVSVNFGLGMRKLHFFLSHNLAEYKLNLLFENIWQIELHRPRGQTVKYLLIQLYGAPRIYERDVPSSSNVFEDPLLNYFRDVPDEQWVRTTDFTPSCGIGHSSSLCLELPNHLQLPNFNENFFYYKENEGTFVLESGLTFSRNPDLVPIVGPSSGVNLPYNILFRVNLLVQNGCLAGSMLDDIFYRLVDPNRMPVRCIEYALEKLYHLKECCYEPSKWFNEQYKKYLTSGNPPRSPVLSLDAGLVYVYKVQITPCKVFFCGPEVNVSNRVLRQYREDID…
PtRDR1b	MDLLLFDDQSNKLKFEALSSLNTHFRRPIHHCLASNESLDGKTISLYRFRTVETSEDIKEFLEEYSGDGTVVSVDVDQTISEGSRTKAKVQFTTSEAAQKVKLRSYLKVRDMDYDIVPTRMAAEYTIDNITLHFGCQVSKEKFYALWNKENVSVKFGFGNRKIYLFLTYLSTKYKLELSYENIWQIELHRPRGQAKKFLIVQMLGAAKILKKDTDDQWVRDVDFSPSYCIGQSSALCLELPRSGQLPNFQENFPCYKEDEGRFFLEVGSTFCRVSDLVPILREAQGIELPYDIVFKVNSLVQHGYLPGPALDASFYRLINPSRVNIAHIQNALEKLHHSMECCYDPVRWLREEYRKCISTGRLPTPPAVAVDDGLVHVRRVQITPTKVYFRGPEVNLSN…
PtRDR1c	MAKTISLYGFPTVEPPDDIKEFLEEYSGEGTVVAVHVAQPKSAGSRTNAIVEFTTSEAAQNIKLKSLDDEGLWYGNSYLKARDVYRDTVPMRKAFQTQYSMDNITLHFGCQVSKEKFSVLWTQKDVSVKFGVELRKFHFFLTHLSKNYKLELSYENIFQIELHRPRGKTKKYLLVQMLGGPKIFKKDTNKLSNFKEATDDQWVRDVDFSPSYCIGQSSALCLELPPNSQLPNFQENFVCYKEDEGHFILEKGSTFCCKSDLVPILSAAQVSELPYDIVFKVNSLVQHGCLPGPALDARFFRLINPSKIRIAHAYIQHALEKLSHLKECCYDPARWLREQYQKYLTTGRLPTPPAIAVDDGLVFLRRVQITPTKLYFCGPDVNLSNRVLRKYPGDIDNFL…
PtRDR1d	MAKTISLYGFPTVEPPDDIKEFLEEYSGEGTVVAVHVAQPKSAGSRTNAIVEFTTSEAAQNIKLKSLDDEGLWYGNSYLKARDVYRDTVPMRKAFQTQYSMDNITLHFGCQVSKEKFSVLWTQKDVSVKFGVELRKFHFFLTHLSKNYKLELSYENICQIELHGPRGKTKKYLLVQMLGGPKIFKKETRKLSNFKEATDDQWIRDVDFSPSYCIGQSSALCLELPPNSQLPNFQENFVCYKEDEGHFILEKGSTFCCKSDLVPILSAAQGSELPYDIVFKVNSLVQHGCLPGPALDARFFRLINPSKIRIAHAYIQHALEKLSHLKECCYDPARWLREQYQKYLTTGRLPTPPAIAVDDGLVFLRRVQITPTKLYFCGPEVNLSNRVLRKYPGDIDNFL…
PtRDR2	MEVVAERPSVRVTNIPQTITAKEILQYLVAQLGKDSVFAIEISTVRKNWNSRGFGRVQFSSLEVKHEALSLSLKNKLVLKSQNLKLSETYDDIIPRPVKDQNRMENGVLYVGFMKKETTLCVLEYWEGVRGWFMPERRRIEFWIRVGQEFRYKLVVEFEDILEAVGYPLDGDKVNAVVLKLRYGPRIYQKISGPGIASKFSTNRYFYCKEDFDFLWVRTTDISAIKSIGQSTSFCWEIGEGLEASDTFRNFPYYQEDMNRLDLEDGEEFCSASETVPLIRCGSDKLAYEVLFQLNSLVHTQKISLAAVDSDLIKILRNLTVNTAIIILQKLHKLKMTCYDPLSFVKQSLRESLSSPPKSLTENNIMSCHRALITPSKIFCLGPEYETSNYVVKHFAQYA…
PtRDR3	MHSSLSPSPQQPQNRTNTRLLMNSQSDSGAQSPTPLKLEGSSTMDSQRQRGSESTTSQHLVALGELEFRKAFLILNYLGGKNLEEVVSADQIRGYKDLPMETFESKIWDAFGCRRDYIKEEDRVKYLDWDSGKAHIYHCHVDPDGSYRFKGPYLSKQRNVLQRTLGDDNILMVKFEEVKDERYSVSSSLDNYFAKYNKVLREGIHVGLRCYRFFVFKDGGKEEKKKDPTTSPVKCFFVCMESVASVDNQDNILCGKTIRQARSVFMHVDNLSSLSNYMARFSLILSKTMNLEVDLSFVDIKPIADEPCRDKDGNAVYGTDGKPLIHTDGTGFISHDLALKCPKNQVKGTCLQASNIERLRVHNEVMEQNPECLHGDPPLLIQFRLFNNGRAVKGTFLVN…
PtRDR4	MAEINNDKIVPLPCVVEELIAKICREQNRRPLETNTRLTLASLGEEVALNILWRISGQEIRKSFDGFVLHLAKQFSPNINASSSSPNIHSSLSPSPQQPQNRSPITTTRLLMNSQSDSGAQSPISLKLEGSSTMDSQRQRGNESTTSQHLVALGELEFRKAFLILSYLGGKNLEEVVSVDQIRGYKDLPMRTFESKIWEAFGCRRDYIKEEDRVKYLDWDSGKTHIYHCHVDPDGSYRFKGPYLSKLRNVLQRTLGDDNILMVKFGEVKDDRDSGSRSLDDYFSKYNKVLGEGIHVGLRCYRFFVFKDGGKEEKKKDPTTSPVKCFFVRMESVASIDNQDNILSGKTIRQARSVFMHVDNLSSLSNYMARFSLILSKTMNLEVDLSCVDIKTIADEPCR…
PtRDR6a	METEGSAKETVVTQVSLGGFDIHVTAKDLLEYLEREIGLVWRCRLKTSWTPPESYPNFEITDITKITRTEDYRRVEPHAFVHFALPQSATCAIDAADRCELFLNNKGLKASLGPENPFTLNQRRRKTTPFKLSGVGVEIGTLVSRDEFFVGWRGPPTGVDFLVDPFDGTCRFCFSRNTAFSFKSTAEHAVIKCDFKVEFLVRDINEIKQYTETSCLVLLLQLASAPRVWYRTADDDIEVSVPFDLLDDDDPWIRTTDFTASGAIGRCHSYRVSIPPRHGPKLRKAVDFLKERRVQEEYLRRPIRIRDEPDFGMPMTDPFFCIHHKEGIAFDVLFLVNAVMHKGIFNQHQLSNDFFDLLRNQPTEVNVAALKHIYPYRRPVFDAYKKLKVAQEWLLKNPK…
PtRDR6b	MEAEGSAKETVVTQVSVGGFDIHVTAKDLLEYLDRAIGLVWRCRLKTSWTPPESYPNFEITDITKIERTEDYRRVVPHAFVHFALPQSATLAMNASGRCELFLNNKALKVSLGPKNPFTLNQRRRTTTPFKLSDVGFEIGNLVSRDEFFVGWRGPPSGVDFLVDPFDGTCKFCFSRNTAFSLKSTSEHAVIKCDFKVEFLVRDINEIIQYTETSCLVLLLQLASAPWVWYRTADDDIEAWVPFDLLDDDDPWIRTTDFTASGAIGRCHSYRVSIPPRHGSKLRKAVKYLKERRVQVLQEENHRRRIRILDEPDFGMPMSDPFFCIHHKEGIAFEVLFLVNAVMHKGIFNQHQLSNDFFDLLRNQHTEVNVSALKHICTYRRPVFNAYRRLKAVQEWLLK…
VvRDR1a	MSKTIQVYGFPSIVSADEIKEFLEKYTGEGTIEALEIKQPRSGASMTHAKVQFTSFELAEFIITLCKKKVWYGRNYLKAREMDLDIIPKPRAFLHSMDRITLHFGCQMSDERFCVLWKAINVSHPRGQITKFLLIQLLGAPQIYEKDVPVLSYYFKEAPDDQWVREIDFTPSCFIGQSFALCLELPYGSQLPNFRENFAYYKENDGKFILESGSSYSHNLHLVPILGPPQGSSLPFQILFKINTLVQNGCLSGPTLDTSFFRLVDPERFPISFIEHALEKLYHLKECCYEPVRWLSEQYRTYVKKPVAGSPAISLDTGLVYVRRVQITPYENLEKIHSTVISPRMSKEGRRTGVYRRILSILQNGIVIGDKKFDFLAFSSSQLRDNSAWMFASRPGLTA…
VvRDR1b	MGKTIQVYGVPSNVSANEIKEFLEKYTGEGTIEALEIKQPKSGVSMTHAKVQFTSLRLAELIISLAKQLWYGGNYLKAREMDLDIIPKPRTFLHSMDRITLHFGYQMSNERFCLSCENIWQIQLREPRGQNTKFLLIQLLDAPQIYEKDVSALSYFKETPDDQWVREIDFTPSCSIGQSSALCLELPHGSQLPNFCENFARYKENDRKFILESGASFSGNLHLVPIVGPPQGSNLPFKILFKINTLVQNGCLSGPTLDTNFFRWVDPQRINISFIEHALEKLYYLEECCYEPVRWLHEQYRTYISKQVAGSPAISLDTGLVYVRRVQITPCKVYFCGPEVNVSNRVLRNYPEDIDNFLRVSFLDENSEKIHSTVISPRMSNEGRRTGVYRRILSILQNG…
VvRDR2	MAVGERPTVKVSNIPKTAIAKELWSFLESKLGPNTIYALEIATEHKNWKSRGFGRVQFETLQAKRAADLLSLQGDLVFRGSSLSISATFDDIIVRPVEPRNQVDSGVLHVGFLVEDDCMLVLESWEGVKTLVMPERNRVEFWVDKDGERYKLEVPFDDVLESSACCLGGGKVNALLLKLKYAPKIFQKFAGPNIASKFSADRYHISKEDAEFLWLRTTDFSSIKSLGQSTSFCWEIKEGFPALDIFASFPYYKDLTELTLEQGEGFCSDSGLVPLVKCESGPKLAYEILFQLNSLVHAQKISLAAVDTDLIEILSNLPVDTAIMILQKLHKRKSTRYDPISFIKAQAHIINMNIKNLPPSSHSRLTNNNVMSCHRVLVTPSKIYCLGPELESSNYVVKH…
VvRDR3	MEVSLPHSVEQMLQRICTEQQQPPPEAHTRRNLASLGEESTLELLRKISHLKIRNLSALINYMVGKAAQGDAASHSPTPKHLISSPSSTPKKARRQASSPQLVALGELEFRKAFLILSYIGDKRPEDLLSAEEILKLKNLPMGVFETEVWNNLGRKFIKEEDRQRSFDWDSDKTHIYHCHVSPDGSYRFKGPYLNKTRTHLQRVLGDENILLVKFAEDVTDRSSLNCSTDSNASYNKIAREGIFVGLRQYRFFVFKDGGKEEKKKNPTSSVKCYFVFMESSALSGKTVHEARCIFMHAHMVSSVAKYMARFSLILSKTVKLDVDLSTVNIQRIDDEPGRDEDGHVVYDEDWKPLILTDGTGFISEDLALRCPNNLCRGKYMNNGNSDPLLIQCRLFNNG…
VvRDR6	MVVTQISIGGFDQYVTATELTYYLEDTIGSIERTEDYKKRRRTTFPFKFPDVRLEIGILLSSSPFVYYRTADDDIEETVPFDLLDDDDPWIRTTDFTVSGAIGRCNSYRISIPPRYGAKLKKAMDYLRARRVNVLEDSPKWQLRVRDEPDFGLPMSDPFFCIQHKEGIDFRVMFLVNAVMHKGIINQHQLSDKFFDLLRSQQKDINIAALKHICSYRHPVFDAYQRLKLVHKWLLKNPKLLKSPKELDDIVEVRRLVITPSKAYCLPPEVELSNRVLRNYKEVSDRFLRVTFMDEGMQTINANVLNYYVAPIVKVITSNSFPQKTRVFKRVKTILTDGFYLCGRKYSFLAFSSNQLRDRSAWFFAEDKKTSVRAIKSWMGKFTNRNVAKCAARMGQCFS…

## Sheet: DCL
Supplementary table 1C
gene name	sequence
SlDCL1	MDGDGSGVSEKPSYWIDAYEDISCDDLIQDFVGSNTVPVAPLNQLGPDETLDPCFFGGIDGILEKLKNGDGSVHSVDGNNSNVHTEALAAPGICKDNGPQVKKDVDHNKGDLGKKSLQEGNGFSRHKERGCSDKEEKNGKRARLGDDSYQRRGCDRPLARKRLRENDEINRVGRDQRKRREYHGGRGGRDRNWREGSGFWEWDKEKKEMIYRVGSWEADRNREGKLPTERSREPSGAIEKKDDKLKEQAPKEEARKYQLDVLEHARKSNTIAFLETGAGKTLIAILLMKSLCSDLQKKNKKMLAVFLVPKVPLVYQQAEVIREQTGYQVGHYCGEMGQDFWDARRWQREFETKQVLVMTAQILLNILRHSIIKMEAINLLIMDECHHAVKKHPYSLVMS…
SlDCL2a	MLQSLKTNSSPLTLCLLLEGCYQLEALETALKQNTIVYLETGSGKTLIAIMLLRSYAYLLRKPSPYIAVFLVPTVVLVTQQGDSLMMHTDLKVGKYWGEMGVDYWDAATWQRQVDAHEVLVMTPAILLAALRHSFIQINMIKVIIFDECHNARGKHPYASIMMEFYHRQLTRQSLQLPRVFGMTASPIKSKGSSTADSYWQKIRDLENLMNSKVYTCGSESVLAEYIPFSNPKLKIYKHVDIPCTLFLSLAHDLEQLKEMHDCSISKSNLSFMSAGTARRRLSKLYSAFLFCLSEMGAWLAFKATEFLSREEVDFLSWGELDVCAQTIVRDFSWGASKIFSARLPSGPYWSIGGDIQANVDAGYLSSKVTCLLESLLEYRDQKDLRCIIFVERIITAIV…
SlDCL2b	MLLRSYAYLLRKPSPYIAVFLVPTVVLVTQQGDALMLHTDLKVGKYWGEMGVDYWDASTWQQQVDDHEVLVMTPAILLAALRHSFLQIDMIKVIIFDECHNARGKHPYASIMVEFYHHQLTHESAQLPRIFGMTASPIKSKGASTAHSYWQKIHDLENLMNSKVYTCSSESVLAEYIPFSNPKLKIYEHEDIPCSLFNTLAHDLERLKEKHECSISKSNLSAMSAGSARRRLSKLHMAFLFCLSEMGVWLAFKAAEFLSFEENDFFSWGEFDACAQTIVRDFSLGASKIFSARLPSGPHWSIGGDIQANADAGYLSSKVNCLLESLLEYRDQKDLRCIIFVERIVTAIVLRSLLNELLPERSGWRTEYTAGHVSVLQSQSRKSQNKIVEEFRKGLVNII…
SlDCL2c	MSMARANDVVCGNQLVSADPLPFARSYQLEALEAALKQNTIVYLETGSGKTLIAIMLLRSYAYLLRKPSPYIAVFLVPTVVLVTQQGDALMMQTDLKVGTYWGEMGVDFWDAATWKRQVDGHEVLVMTPAILLSALRHNFLQIDMIKVIIFDECHNARGKHPYASIMMEFYHRQLTRESAQLPRIFGMTASPIKSKGPSTPDSYWRKIHDLENLMHSKVYTCDSEAVLAEYIPFSNPKLKIYKHVDIPSTLSKSLAHDMERLKEKHECSITKSTLSDKSAASAKRRLSKLYSAFLFCLSEMGVWLAFKAAEFLSQQETDFFSWGELDVCAQTIVRDFSSDASKVFSACLPSGPHWSIGGDIQANTDAGYLSSKVHCLVESLLEYRNLKDLRCIIFVERI…
SlDCL2d	MLLRSYASLLRKPSPYIAVFLVPTVVLVTQQGDALMLHTDLKVGKYWGEKGVDYWNAATWQQLVDDHEVLVMTPAILHAALRHSFLQMGMIKVIIFDECHNARGKHPYASIMMEFYHRQLTRENAQLPRIFGMTASPIKSKGSSTADSYWQKIRDLENLMHSKVYTCSSESVLADYIPFSNPKLKIYEHVDIPSKLFQTLVHDLERLKEKHECLISQSNLSFMRDGSARRRLSKLHSNFLFCLSEMGAWLAFKSCEENDFLSSDDACVRDFCLGASTIFSAHLPSGPHWSIGKDIQANVDAGYLSSKVNCLLESLLEYRDRKDLRCIIFVERIITAIVLRSLLNELFLERSGWRTEVTTGRITTFKQNKIVEEFRKGLVNIIVATSILEEGLDVRSCNL…
SlDCL3	MATSTCELIWLKQLLRELKFGEINQMELVCDNQAALYIASNLFDAALADLKLSLPSQYKDTDDIYKKLRKRLSNCYAKILCCLENLGIICAYEAVKICLENVPNDKDENEILRTSSLQHRYFLEEALSIVQESMPQDCESLFDVGYDLSATLSMGHISSKLQVLLEIFQLLGKATQVRCLIFVERIITAKVIERVMKKMTWFSHFTIAYLTGTNTSVDALTRKAQKETLGSFLSGKVNLLFATDVVEEGIDVPHCSSVIRFDLPKTVRSYVQSRGRARQTESQYILMLERGNKKQREQMFDIIRSEYSMTDTAIKRDPDDSVVKPCLVKETKAYYVEATGASVTADSSVSVLTKYCEMLPGDKFFSPKPVFQYILSGELYRCKLTLPPNAALQTIVGPE…
SlDCL4	MGHLIKKPQKSICVFLAPTVALVQQQAKVIEESIDFKVGTYCGKSKHLKSHQDWEKEMEQYEVLVMTPQILLHNLSHCYIRIEFIALLIFDECHYAQVESDHPYAEIMKIFYKPDVVKQPRIFGMTASPISGKGATVEGLETLLRSKVYSVEDKDELEQFVASPKVNVYQYGPGSSCHTKAYSQKLEEIKHQCVKELHKKAVDSTLRNTKKMLKRLHGHLIFSLENLGVLGALQASCILLKGDHHERHQMVEAEVNASDDSLCDRYLSQVDTVFTSGCAKDGMNPDLALMEVLKEPYFSKKLLRLIGILSNFGVQPDMKCIVFVNRIVTARSLSYILQHLKILSSWKCGFLVGVHSGLKSMSRKNTNIILDKFRSGELNLLIATKVGEEGLDIQTCCLV…
AtDCL1	mvmedepreatikpsywldacediscdliddlvsefdpssvavnestdengvindffggidhildsiknggglpnngvsdtnsqinevtvtpqviaketvkenglqknggkrdefskeegdkdrkrarvcsyqsersnlsgrghvnnsregdrfmnrkrtrnwdeagnnkkkrecnnyrrdgrdrevrgywerdkvgsnelvyrsgtweadherdvkkvsggnrecdvkaeenkskpeerkekvveeqarryqldvleqakakntiafletgagktliailliksvhkdlmsqnrkmlsvflvpkvplvyqqaevirnqtcfqvghycgemgqdfwdsrrwqrefeskqvlvmtaqillnilrhsiirmetidllildechhavkkhpyslvmsefyht…
AtDCL2	mtmdadametettdqvsasplhfarsyqvealekaikqntivfletgsgktliaimllrsyaylfrkpspcfcvflvpqvvlvtqqaealkmhtdlkvgmywgdmgvdfwdsstwkqevdkyevlvmtpailldalrhsflslsmikvlivdechhaggkhpyacimrefyhkelnsgtsnvprifgmtaslvktkgenldsywkkiheletlmnskvytcenesvlagfvpfstpsfkyyqhikipspkraslveklerltikhrlslgtldlnsstvdsvekrllrisstltyclddlgillaqkaaqslsasqndsflwgelnmfsvalvkkfcsdasqeflaeipqglnwsvaningnaeaglltlktvclietllgysslenirciifvdrvit…
AtDCL3	mhsslepekmeegggsnslkrkfseidgdqnldsvsspmmtdsngsyelkvyevaknrniiavlgtgidkseitkrlikamgssdtdkrliiflaptvnlqcceiralvnlkveeyfgakgvdkwtsqrwdeefskhdvlvmtpqilldvlrsaflklemvclliidechhttgnhpyaklmkifnpeeregvekfattvkegpilynpspscslelkekletshlkfdaslrrlqelgkdsflnmdnkfetyqkrlsidyreilhcldnlglicahlaaevclekisdtkeesetykecsmvckefledilstigvylpqddkslvdlqqnhlsavisghvspklkelfhlldsfrgdkqkqclilveriitakvierfvkkeaslaylnvlyltenn…
AtDCL4	mrdevdlsltipskllgkrdreqknceeeknknkkakkqqkdpillhtsaathkflpppltmpyseigddlrsldfdhadvssdlhltssssvssfsssssslfsaagtddpspkmekdprkiarryqvelckkateenvivylgtgcgkthiavmliyelghlvlspkksvciflaptvalveqqakviadsvnfkvaihcggkrivkshsewereiaanevlvmtpqillhnlqhcfikmecisllifdechhaqqqsnhpyaeimkvfykseslqrprifgmtaspvvgkgsfqsenlsksinslenllnakvysvesnvqldgfvssplvkvyyyrsalsdasqstiryenmledikqrclaslkllidthqtqtllsmkrllkrshdnliytll…
OsDCL1a	MAGGGGVGGGAGEHAAAAYWYDACEDGASLLCGIDFAASADFDPGLIPAMDTGADDGFVAEIDRILESINAESSPAPPPPPPPPLPEPVPVAPPELPIQEKQLQVASAPVANNAVAVVGVVQRSKGVVARKEPRRESHGCAANGGGGGEWRDGKRPRLASGGVGGPRQEWRRRPMLPPPPSRGWDDRRGRRDFDRVRKHEHHRREARGFWERDRGGKMVFRSGTWEQESDREAKRARTQDGGSMEKKAEADRMGAAQREKPVAEERARQYQLEVLEQAKSRNTIAFLETGAGKTLIAVLLIKSVCDKMLKENKKMLAVFLVPKVPLVYQVLVMTAQILLNILRHSIIKMDAIHLLILDECHHAVKKHPYSLVMSEFYHTTPKEKRPAVFGMTASPVNLK…
OsDCL1b	MESPPHATASADEMPSIWKEQHAQDAPPGFVPPMGPGEVAAVESLLGYEFRDKALVEEALTHGSFYYPYRPGVTYERLEYLGDAVLTCVVSREVFLTYGQLQPGPLTRLRAANVDKEKLARVAVVHGLHHFLRHKAPNLDGQITDFIEELSMYPIHSNGLLDPPKVLCDVVESLIGAIYCDSNFNQEIVWQVFQKLADPLISLETLGKHPVSELFEFCQKTRRGVKIVKDEWDKNLTVEVLIDGEMVGRATYAQKKEIAQNRAAKAALDKLKETLGQSQTEPMSAEVSEQFNKIDLTGS*
OsDCL1c	MAPPPAMKPASRKRGPPAPDPVELPPPGFVADRAEAAARVERLLRYQFRDGRLLEEALTHQSFADDAVSYQRLEFVGDSALGLAFSNFLYLTNPTLGPGPLSTLRAANISTEKLARVAVRHDLYPLLRRNCPRLDLLVGQFIETVKQEPEDDLSTVPYGGSVVKAPKVLADIVEAIAAAVYVDCKFDLEKLWKVTRWLFEPIITAETIDEQPVTMLHELCQKHGKMAQFKTWQKGGMTVVNVFVAGELVGIGSSEQKVIAKLNAARDATRKLAGAKKQVLTTGVGNGLGDEIGELRECKQKLNEQCSRQNWPKPIFK*
OsDCL2a	MGGPLTAAGGRGDGGAKAVEPLRPPPPPDPKTMARWYQLEALERAVRGNTLAFLETGSGKTLIAVMLLRAYAHRVRRPDSRRFAVFLVPTVVLVGQQARVVEQHTDLVVKQFCGEMGVDFWDAATWRSQLEDGEVLVMTPQILLDNLRHSFFRLQDIALLIFDECHHARGNTPYACIFKEFYHPQLNSSASDPLPRIFGMSASLIYSKDLNPHNYSKQISEIENLMNSKVYTVDSESALSEYIPFASTKIVDFDDSNISSELHANILSCLNRLNKKHIEALDRKLHGSSLENAKQRISKLHHTFVYCLYNLGVWLAAKAAEVQSYEENSLSFWGETLDKNVEGFIRNYSEEVHRELSCFLKNGHIGEKFPADSQDGILTPKVHCLIRTLLQYRHMQDLR…
OsDCL2b	MKYVGIIHLNQEQVIIARRFQTTILSFLIGDDHLEVSNGIKYFHEMQVPIGVVYLLLPLVSGRIDWCSMKFSSSPIYEANNKHMTHCHSCRDIDLLQTKDGPFCRCILKNSIVCTPHNNIFYVISGFLDLDANSRLPQHDGTVVTYKDYFKTRHGLTLTFENQPLLAGSKHVKVRNFLHNYYYKKEKEPGDRYSVELPPELCRIIMSPVSANNLHIFSYVPSIMFRIQCMLLSVKLKVQLGPTVQQFDVPVLKILEALTTKKCQEEFSQESLETLGDSFLKYVTTRHLFSEYRLQHEGILTKMKKNLISNAALCQLACSSNLVGYIHAEEFNPRDWIIPCLDYDERGNKKISFLAPNGMYSQRKMSIKSKRIADSVEALIGAYLSTAGEKAAFLLMKSL…
OsDCL3a	MAVNMNPLKRSLESSSQEHEAGKQKLQKRECQDFTPRRYQLDVYEVAMRRNTIAMLDTGAGKTMIAVMLIKEFGKINRTKNAGKVIIFLAPTVQLVTQQCEVIEIHTDFEVEQYYGAKGVDQWTGHGHDTTGVPTSFTQCFLNLGHGISSHLDCEGQFCELENLLDAKIYTVSDREEIEFCVPSAKEMCRYYDSKPVCFEDLSEELGVLCSKYDALITELQNKRSDMYKDADDITKESKRRLSKSIAKICYCLDDVGLICASEATKICIERGQEKGWLKEVVDATDQQTDANGSRLFAENSALHMKFFEEALHLIDKRLQQGIDMLLNSESGCVEAAKTGYISPKLYELIQIFHSFSNSRHARCLIFVDRKITARVIDRMIKKIGHLAHFTVSFLTGGR…
OsDCL3b	MVAVMLAREHARRVRAGEAPRRIVVFLAPTVHLVHQQFEVIREYTDLDVMMCSGASRVGEWGADHWKEEVGRNEIVVMTPQILLDALRHAFLTMSAVSLLIFDECHRACGSHPYARIMKEFYFGSQWRPDVFGMTASPVATKGASTLHNCEAHISQLELTLDAKIYIVEDRNELESFSPPTTIVNKYYDAYMVDFDNLKSKLQIFSDEFDSLLVGLQESPSNKFKDTDNILETSRKSLSRYHGKILYSLNDLGPIITSEVVKIHIESVKPLCDSEDCIFSKASLCLHMSYFKEALSLIEEILPQGYGELMKSESGSEELTKRGYISSKVNTLINIFKSFGSSNEVLCLIFVDRIITAKAVERFMRGIVNFSCFSISYLTGGSTSKDALSPAVQRFTLDL…
CsDCL1	MEGETRVSDIVGGGESNQSSYWLDACEDILIDEFVNFDTSVVQDSVDNTSNQDSLSNDFFGGIDHILDSIKNGSGLPNSNGNLLKNGSEDSTGGENHQAEGLILLSNNGSDKDGVDRKRKLENCENVNGYLVNGKAGGRLSDHFTKENGVHRDNGNNDHEASRIRDFDSEDRFSKRARVSVCKNESQYSSRGQYCSSDKDRVFGRKRLRDLDDIGRRDRDPMRRREHYNGSSRKDVRDKDFRDREPRGYWERDRLGSNGMVFRLGSWEADHNRAGKEANGINQECNGKVGKKSEAKEKMPEEQARPYQLDVLEQAKKKNTIAFLETGAGKTLIAVLLIRSICNDLQRQNKKMLAVFLVPKVPLVYQQAEVIREQTGYVVGHYCGEMGQDFWDAQRWQRE…
CsDCL2a	MEPVSMESDTTEEVSADTLPFARNYQLEALENALKQNTIVFLETGSGKTLIAIMLLRSYAYLLRKPSPFVAVFLVPKVVLVPQQAEAIKMHTDLKVGKYWGDMGVDFWDGATWKEEMSKHEVLVMTPQILLDGLRLSYFKLNMIKVLILDECHHARGKHQYACIMTEFYHRLLETGDSNLPRIFGMTASPIKSKVSSSEQDYWQKIHDLETLMNSKVYTCASESVLSNFIPFSTAKFKFYKYDEIPHALYTHLADELAMIELKHTRSLENLDLNEAQAELIRKKVSKINSTLLYCLSELGVWLALKAAETISCYESDFFAWEQLDGFGETIIKKFGSDASQALVTYVPSGAEWSIGDDSKFNLDSGLLTEKIVCLIESLLEYRGVEDIRCIIFVERVIT…
CsDCL2b	MFDPSHTVCSFIQSRGRARMQNSDYLLMLKRYFKPTPKFDINKEMGICTLYLPNNCPIQTVIAQGNIKTLKQTACLEACKKLHQIGALTDNLLPDVVVEEHDAQKHGNEPYDAEHPIYFPPELVNQCPQDTKITYHCYLIELKQNFNYDIPAHDIVLAVRTELESEIKKVNFDLEVDRGRLTVNLKHLGKIQLTPDKVLLCRRFQIALFRVIMDHNLDKLNEILKGLWLRDNLEIDYLLLPASEQSIDWEPVASLSFPCDIGLKHHKNCSTMSNARVVQTKSGPLCTCMIYNSVVCTPHSGQIYYITGVLGHLNANSLFTRNDGGAITYKKHYEERYGIQLCFDQELLLNGRRIFHAQNYLSKCRQEKQREPSKISFELPPELCRIIMGPMSLSTFYSF…
CsDCL3	MHSPLNSLKRSFGEVHSPNPPDMGSSGHDHAVDGPSSSTNSINFIPRIYQLKVFEVAKRRNTIAVLETGAGKTMIAVMLIKDIAQAIKSNGFKKLIIFLAPTVHLVHQQYDVIRVHTDFEVEEYYGAKGVDEWDSQCWQKEINKNDVLVMTPQILLDALRKAFLSLDIVCFIVIDECHHATGNHPYTKIMKEFYHKSDNKPKVFGMTASPVVRKGVSSAMDCEGQISELESTLDSQVFTIEDKTEMEVFVPSAKESCRFYDQSKFCGSDLKGKLEVSWSKFDASLSKLQGSQLNCYKDMDDKHKTLRKQLSDYHAKILYCLDELGLICAYEAVKICLEKVLKAQEECEIYRQSSLQCKYFLEEVLHVIGSALPLADKIFLDFGFDYSKAVDLGYISTKL…
CsDCL4	MPDGESTVEGSQPSGGGTKICAATSAVVEECSVAVSGVGFGAESSVGAQKTDKDPKQIARKYQLELCKKAMEENIIVYLGTGCGKTHIAVLLIYELAHLIRKPQKSICIFLAPTVALVQQQAKVIEESIGFKVRTFCGGSKRLKSHCDWEKEIDQYEVLVMIPQILLYCLYHRFIKMELIALLIFDECHHAQVKSNHPYAKIMKDFYKPDIMKVPRIFGMTASPVVGKGASAQANLPKSINSLENLLDAKVYSVEDAEDLESFVSSPVVRVYQYGPVINDTSSSYVTCSEQLAEIKREQYISALSRKLHDHQSLRNTTKQLNRLHDSMKFCLENLGVCGALHASYILLSGDETMRNELIEAEGNTIDDSLCRFASQASEVFAAICRRDGIASDLSCIEV…
PtDCL1	MESESNGRVSGIGGGGGPSYWLDACEDISCDIIDDFVDFDTSIVPELSVDNNSNVNNDFFGGIDHILDSIKNGSGLPPLHNASTTANVSNGNRDCIVGDGWFINVENGVCHGSSVSQSNGGDKDNIDRKGQVENGGNGLNLSNGKREERFSNNFVKENGKKDEQSTEQGIDGDERCGKRARLCCYRNERVYSSRGEHRDRERCSSRKRSRDWDESDRRDRDISRRRDRYSGSNRRDGRDRDWRERELRGYWERDRSGSKDMVFRLGTWEADHNKEGREANDKIQECKGELEKKSEESKEKVPEEQARQYQLDVLDQAKKKNTIAFLETGAGKTLIAVLLIRSICNDLQRQNKKILAVFLVPKVPLVYQQAEVIRERGYQVGHYCGEMGQDFWDTRRWQR…
PtDCL2a	MEPVSMDIDTTQQLPADPLPFARSYQLEALEKALKHNTIVFLETGSGKTLIAIMLLRSYAYLLRKPSRFIAVFLVPQVVLVRQQAGAVEMHTDLKVGMYWGEMGVDFWNAATWKKEIEKHEVLVMTPQILLNGLRHSFFKLDLIKVMIVDECHHTRGKHPYASIMTEFFHCELKSGHHDLPRIFGMTASPIKSKGANSELYYWQQIRELEDIMNSKLLSPFAFGSLLQDEDDPHGTFQMHSTNIHVISHSCSKVFENCIPGTRHMIYTCVSESALAEFIPFSTPKFLFYEHMKIPDGIFASLLKELGNLRTKHEHMLEQLDLNESAAVSICNKISKVHSALMFCLEELGVWLAFQAAQFLSHCDTDGDFISGGKLDVSGETIVKNFCQDASLAISNCFS…
PtDCL2b	MLLRSYAHLLRKPSRFIAVFLVPEVFLVRQQAGVVRMHTDLNVGMYWGDMGIDFSHAATWKQEIDKHEVLVMTHQILLNGLRQGYFKLDFIKVLIFDECHHARGNHPYACIMTEFFHRELRSGHHDLPRIFGMTASLIKSKGANSESYYRQQICELENIMNSKVYTCASETVLAEFIPSPAAEFLFYEPMKIPDGIYACLEEELGNLKAKHELLLKQLDLSESAAESVHSKISKVHSALMFCSGELGVWLAFQAARFLSHSDTDSDFIAWGKVDVSGETIVKKFCWDASLVISNCFSAECCIGDNTEADVGAGLITAKVLCLIKTLLQYRDLKDIRCIVFVERVITAVVLESLLRELLPKHSSWKTKYIAGNNSGLQSQTRQMQNEIVEEFRKGMVNII…
PtDCL3	MDTAMPDHDPLKRSFGDMMVNNNSSSSCLAMDTSNGITDHNDTTPQGLASVLSNHKEFYPRGYQSKVFEVAVKRNTIAVLETGAGKTMIAVMLIKQIGQAVFYSGVKRLILFLAPTVHLVNQQYEVIKSQTNFRVGEYYGAKGIDEWSLKSWEKEIDEHDVLVMTPQILLDALRKAFLNLKMVSLLILDECHRSTGNHPYKKIMKIYTIEDRAEVHVYVPSAKELCRFYDKAWCSYVELKDKIEASWSKFDASMLALQGSTQSCYKDMDDKLKATRKQLSKDHAKILNCLEDLGLICAYEAIKVCLENAGNPTGECKLYQEISLQCRYFLEDVLHIIGESLLHGDNFSLDHGFDCSAALGFGYISPKLHELLQLFLSFGEAREVLCLIFVERIITAKVV…
PtDCL4	MSGGHVTGEHSSLSVGGTNARVVSSSIVGDGEESGSGLQRTEKDPRKMARKYQLELCKKALEENIIVYLGTGCGKTHIAVLLIYEMGHLIRQPQKSACVFLAPTVALVHQQAKVIEDSTDFKVGIYCGKSNRLKTHSSWEKEIEQNEVLVMTPQILLYNLSHSFIKMDLIALLIFDECHHAQVKSGHPYAQIMKVFYKNNDGKLPRIFGMTASPVVGKGASSRENLPRSINSLENLLDAKVYSVEDKEELECFVASPVIRVYLYGPVANGTSSSYEAYYNILEGVKRQCIVEIGKKTDGNQSLESLRSTKRMLIRMHENIIFCLENLGLWGALQACRILLSGDHSEWNALIEAEGNTSDVSMCDRYLNQATNVFAADCTRDGVTSNVSQVEVLKEPFFS…
VvDCL1	MEGEMMNKGVSGSEAYWLDACEDIPCDLDFPEFESNIVSESADAPSNPDGVGDFFGGIDRILDSIKNGTGLTPVVDEGTTGIPDCAVSQTWFQTENVAGNGVKKHENRPNDASRDRDFDDQERYSKRARLGDSKNDRHYSTRGQYQPRERSSCRKRSRNWEEFDRRDGDQIRRKEHYGSRRESRDREWRDREAKGYWERDRLGSKEMIFHLGSWEAERNREGKMGAEKNQECNGSVTERRLEEPKEKLPEEQARQYQLDVLEQAKKRNTIAFLETGAGKTLIAVLLIRSVFNDLQGQNKKLLAVFLVPKVPLVYQQAEVIRERTGYQVGHYCGEMGQDFWDARRWQREFETKHVLVMTAQILLNILRHSIIKMEAINLLILDECHHAVKKHPYSLVMSE…
VvDCL2	MLLRYYAHLLRKPSPFIAVFLVPKVVLVPQQAEAVKMHTDLKVGTYWGDMGVDFWDAATWRKEQDKHEVLVMTPAILLNGLRHSFFKLDMIKVLIFDECHHARGKDPYACIMKEFYHEQVRSNNSNLPRIFGMTASPIKTKGTTSTWSCGKNMIELENLMNSKIYTSVSEAVLAEFVPFSTPKLTHYKDKDIPSALFENVAHQLEILKNKYEHSLESLNLMESTKESARKKISKLFSAFLFCLNDLGLWLALKAAEFSFCDDMDICCWGQLDLSGEEIIKNFNKDAYKVISTYLPSDRELSVGDDLEADAESGFLTTKVICLVGSLLQYRHLKNLRCIVFVERVITAIVLQKLLSKLLPKLSGWEAGYIAGNASQLQSQSRRVQNALVEEFRKGMVNVI…
VvDCL3	MHSPELANPLKRSFDEMNLKRDADDDSNPPPSPLPSSSSSSKELSPRSYQWKVFEVAKRRNTIAVLDTGTGKTMIALMLIREIGQAVKADGRKLFIIFLAPTVHLVNQACFFFIFSQFKVIKDSTGFEVEEYYGAKGVDEWSAKSWEKEISEHDVLVMTPQILLDALRKAFLSLETVCLMIVDECHRATGNHPYTKIMKEFYHKSVDKPKIFGMTASPVIRKGVSSSMDCENQISELESILDCQIYTIEDRTELEVFIPSAKEINRFYDASQFHNLDLKAKLKSSWSKFDNLLLNLQGSPMTQYKDMDDKLKALRKRLSNDHAKILYCLDDLGLICAYEAVKVCIENVSNAQEEFEFYRQSSSQCKCFLQEVLGIIGGYLPHGDGNYLNSESDILKAVD…
VvDCL4	MAKGQAPGGGDPGITVAALPITGLAADEGEGSSSGASSSKKDPRTIARGYQLELCKKALEENIIVYMGTGCGKTHIAVLLIHALGHLIRKPQKNICVFLAPTVALVQQQARVIEESIDFKVGTYCGNSRRLRTHHDWEKEFEQYEVFVMTPQILLRGLYHCFIRMELIALLIFDECHHAQVQSNHPYAEIMKVFYKTSSTRLPRIFGMTASPVVGKGASDQANLPKCINSLENLLHAKVYSVENQQELERFVASPKINVYCYHPDINMTSSTCKKLEEIKSQCVLSLRRNVEDHKSLRSTKKLLQRMHDNLIFSMENLGLWGALQASRILLSGDHAERNELMEAEGSASDDRLCDKYLDQSANVLASECIQDGIGSDISYVDVLKEPFFSRKLLRLIGI…

## Sheet: AGO
Supplementary table 1D
gene name	sequence
SlAGO1a	MVRKRRTDVPGGAESSESHETGGGRGGVQRPPPQQQQGGGRGSGPQRGGYGGRGGGGAPRGGIAPQQSYGGPPEYYQQGRGTQQYQRGGGQPQRRGGIGGRGAPSGGSSRPPVPELHQATETPHQPVPYGRPAETYSEAGSSSQPPEPMTHQVTQQFQQIAVQPEAGASQAIPPVSSKSMRFPLRPGKGSNGTRCIVKANHFFAELPDKDLHQYDVSITPEVASRGVNRAVMEQLVKLYRESHLGKRLPAYDGRKSLYTAGPLPFVQKDFKITLLDDDDGPGGARREREFKVVIKLAARADLHHLGMFLQGRQADAPQEALQVLDIVLRELPTSRYCPVGRSFYSPDLGRRQPLGEGLESWRGFYQSIRPTQMGLSLNIDMSSTAFIEPLPVIEFVSQL…
SlAGO1b	MARKRRSELPGSGESSGSQETVGGQGRGQYPPQQQQEATTQTQHQAVMTTQPITCGRPADTSMEVGSSSEPPEMSALQVTQQFQQLAVQPEAAATHTIPPVSSKSLRFPLRPGKGKFGQSCIVKANHFFAELPDKDLHQYDVTITPEVSSRGVNRAVMAQLVLLYQESHLGKRLPAYDGRKSLYTAGPLPFVQKEFKITLTDDEDGPGGARRDREFKVVIKFASRADLHHLGMFLEGRQADAPQEALQVLDIVLRELPTSKYCPVGRSFYSPNLGRRQPLGEGLESWRGFYQSIRPTQMGLSLNIDMSSTSFIEPLLVVDFVAQLLNRDVSSRPLSDADRVKIKKALRGVKVEVTHRGNMRRKYRIANLTSQATRELTFPVDEKGTLKSVIEYFRETYG…
SlAGO2a	MDRGNYRRGGGHDNAGRGGGNRGRGQGRGGGRGEPQIGGGRGGTHIGGGSQMGQPPQQWGNQPRGSGQYQIRGGAPQNQPGQNYPVNQNPGRGGTWVNQPVQRGGGGGGSAWPRPQQQGSGVPNTTWPRPPPQQQGSGSGVANAWARPPPQRSQQHGGGNQQQVVDRSPPQSSDPVQVDLGSLKITDQSPSSRQESSKEKRVPIARPDTGKIAVKSIALLANHFPVRFNPQSTIMHYDVDIQQRADGNRPVKKLTNKSVLHMIREKLCADDPTRFPLDKTAYDGKKNIFSAVQLPTGCFAVNWSDGEDARLRSYDITIKLVAELKLCKLKEYLSGSLSHIPRDILQGMELVMKENPTRCRTSVGRCFYSNEHLPDHDFRFGVAAYRGFQQSLKPTKGGL…
SlAGO2b	MDRGNYQRGGGDNTGRGRGNRGRGGRGGTHVGGGRGGPQMGSFHQPPQQWGNQPRGSGQYQFRGAPPGRGGTWVNQPVQRGGGNAWQRPQQQGSGVPITAWARPPPQQPQQQGSGGGVATAWARPPPPPQEVVDRPQSSDPVHVDMGSLKITEASSSESSKEKRVPVARPDTGKNCVKQIELLANHFVVAFDPHSTIMHYDVNIQQQQSCARDNPIRFPLDNTAYDGNKNIFSAVQLPTGCFAVNWSDGEDFKSRTYDITINLVAELQLRKLEQYLSGNLSYTPRDILQGMDLFMKDNPSRHRISVGRCFYSKNPHKDFRFGAAAYKGFQQSLKPTEAGLALCLDYSVLALRKPMSVLNYLRNYFQIPKEDIFRYNHQAAHDALKGLKVTVNHRRTSQK…
SlAGO3	MDRGNNNGRGGDRKRGRNSDRVPGHNEQRQGPARGYYDPSQYRARAYYEEEQGRARGQHEEEQGRARVQHEQEQGRGRGRGGRDAFQMGSSSSNQPRPSDQHQFTETVAPENQLVSQTPVATGMNWLNAARKGAGTASPPPQQQQKDAPVLLGKITLKDSKKREPMGRPDGGNTSDESVSLHANHFPVDFNDGTIILHYDVDVQKVDGDQPGKSVTDRFDLRKIREKWLMDKPAEFPCDKTAYDGIRNIYSAVDLPAKPLTVNCSVEDDAKEYKYILTFKLVAQLQLDNVTEYLRRSLQNIIPRDVLQGMDLVMKENPRRCRISVGRCFYSNSARTSFNGGVAARKGFQQSLKLTSEGLALCLDYSELLVIPEQIPVIEFLENYYGKNIDDIFKYTRAG…
SlAGO4a	MAEEETNGAAAEGLPPPPPVPPDFTPAKTEIEPVKKKILRVPMARRGVGNKGQKIQILTNHFKVNVNNVDGHFFHYSVALFYEDGRPVDGKGVGRKVLDTVHETYDTELAGKDFAYDGEKSLFTIGALPRNKMEFTVVLDDVISNRNNGNSSPGGHGSPNEADRKRLRRPYQSKTFKVEISFAAKIPMQAIANALRGQESENSQEALRVLDIILRQHAAKQGCLLVRQSFFHNDPKNFVDVGAGVLGCRGFHSSFRTTQSGLSLNIDVSTTMIIQPGPVVDFLIANQNAKDPFSLDWAKAKRVLKNLRVKTTPTNQEYKITGLSDRPCREQLFTLKQKGKDADGEVQTTEVTVFDYFVNHRNIELRYSADLPCINVGKPKRPTFFPIELCSLVSLQRYT…
SlAGO4b	MAEEENGGSTEALPPPPPVPLNFSPAQAEPEPVKKKVLRVPMARRGLGSKGQKIPILTNHFKVNVSNVDGHFFHYSVALFYEDGRPVEGKGIGRKVLDRVHETYDTELAGKDFAYDGEKSLFTIGSLPRNKLEFTVVLDDITSNRNNGTNGNSSPGRHGSPPNETDRKRLRRPYQSKTYKVEISFAAKIPMQAIANALRGQESENSQEALRVLDIILRQHAAKQGCLLVRQSFFHNDPKNFADVGGGVLGCRGFHSSFRTTQSGLSLNIDVSTTMIIQPGPVVDFLIANQNAKDPFSLDWAKAKRVLKNLRVKTAPANQEFKITGLSEKPCREQMFTLKQKSKDEDGEVQTSEVTVYDYFVNHRNIDLRYSADLPCLNVGKPKRPTYFPIELCTLVSLQ…
SlAGO4c	MAEQEYGGSTEALPPPPPVPLDFSPEKAEPAPVEKKLLRVPMARRGLGKKGRNIQILTNHFQVNVSNVDGHFFHYSVALFYEDGQPVEVKGIGRKVLDRVHETYHAELAGKGFAYDGEKSLFTIGSLPRSRFEFTVVLNDITSNRNVGTSSPPNEADRKRLRRPYQSKTYKVKISLAGKIPMQAIANAFRGQEYENSQEALRVLDIILRQHAAKKDCLLVRQSFFHNDSNNFVDVGGGVHGLRGFHSSFRTTQSGLSLNIDMSTTMIIKPGPVLDFLIANQNSRDSVSLDWAKAKRVLKNLKVQTATSNQEFKITGLSEKSCREQTFILKRRSKDEDCEVQTSEVTVYDYFVNHCNIDLRYSADLPCLNVGKPKRPTYFPIELCTLVSLQRYTKALSTF…
SlAGO4d	MASSKDEATATKLDRHPMARQGTGSKGQKIRLLTNHFKVGMNNTDGHFFHYSVAINYEDGNPVEVKGVGRKILDKVHQTYSMELAGKDFAYDGEKSLFTIGALPGNKLEFDVVLEDVSSSRTDRGSPDGSPSDVDRKRSKKQPWSKAYKVVIKYAAKIPMQAIANALRGQDSEQYQEAVRVLDIILRQHAAKRGCLIVRQSFFHNEPRNFVDLGGGVSGCRGFHASFRATQGGLSLNMDVSTTMIVKPGAVIDFLLANQNAKEPYQIDWSKAKRMLKSLRIKTSPSNREYKITGLSDKPCNEQTFTLKQKNGDGGVQEVETTVYDYFTYHRRIPLQYSGELPCINVGKPKHPTFIPLELCTLVSLQRYTKALSNLQRASLVEKSRQKPQERMRALTDAL…
SlAGO5	MSERGRGRRGGSPYGGGRGGGRTPPYGGGRGDGRTPPYGGGRGGGRTSPSDGRGRGYQSPGGRGRGTYSSGGSPSYNAPPMYHHQQQSMEVSSMTREVEQKLSLQPSTSANPPARPQPAQQSSPPVQPPVATIPAHLAGPSTSTQPPRPPPVSSKSIRPPPRPDNGKLGRKCVVRANHFLVQVADRDVHHYDVTISPEVLSKKVCRLIIQQLVNNYRLSHLGGRGLAYDGRKSAYTAGALPFTSKEFVIIFADDNGGPRREKEFKVSIKFAAKADIHHLKQFLQSRQSDVPQETIQALDVVLRTNPSAKYEVVGRSLFHHTFAGDAGLLTGGLEYWRGYYQSLRPTQMGLALNIDMSARAFYESVFVSDYVLRHLNLRDHPQVSLSDQDHSKVRKVLKG…
SlAGO6	MENSEGRESCFSPVEEPPPVIMSNAEPERVDQPKRTIMMRAGDGTSGREISLLANHLKVSIKCPDEIFYHYSVSITSDEKRAVNSKVIRRKIVDKLHETYSSEFAGKKFAYDGEKNLYTVGPLPRNRLEFTVVVEESSARQASESPSDNGSLNHSIKRFKHSLHSKAFLVEIDYAAKIPLRSVDLALQGADPENVQDALRVLDIILRQKAANRGCLLVRQSFFHDDSRNFTDVGGGVMSCRGLHSSFRPTDGGLTLNMDVSTTMILSPGPVIDFLLANQNVKEPRYIDWARAKRMLKNMRVKAKHDNREFKIIGLTDKPCNQQLFSMKVKNGGSPDDGGETLDITVYQYFTKHRNIELSSSVYMPCLDVGKPKRPNYLPLELCYLVSLQRYTKALSSVQ…
SlAGO7	MEHTENSNKCNSKSTTAKICPNNNNNNNNNHYIAFGFHHNTNNNQYHETYPPLLPLPPLLPPLQLPFPQNHNFRSRTHLHKPSFNQNHPFLATPSDFKIQQISASKVLQRQNDVSKQKYGRRVRAAATTTESVVVARRPDSGGVEGPVISLLANHFLVQFDPSQRIFHYDVEISPHPSKDIARLIKKKLVEDHSVMLSGALPVYDGGRTIYSPIEFQNNKIEFYISLPIPSSGSNKSGEIVKLQKEGQQIKLFRVNIKLISKFDGKELNSYLNKEGDDGGSPLPQEYLHALDVVLRESPTEKCITAGRSFYSSCMGGQKDIGGGAVALRGFFQSLRPTQQGLALNVDFSVTAFHESIGVITYLEKRLDFLHDISHRKTRGLTNEEKKEVEKALKNIRVF…
SlAGO10a	MPIRQMKESSEQHIVIKPHLQNTMNPVQKNPKTTQNGKGPPNQEPPNNKIHIQTSPPSRNRGRRRGRGGKKSDQGETFMRPSSRPCTAASKPVIAASVEATNVSGVESNGTSSGFPSSSKSLCFAPRPGYGQLGTKCIVKANHFLADFPDKELNQYDVTVIPEVSSRTVNRAIMAELVKLYKESHLGMRLPAYDGRKSLYTAGELPFKWKEFTIKLIDEDDVINGPKREREYKVVIKFVARANLHHLSEFLAGKRADGPKEALQILDIVLRELSIKRYCPVGRSFFSPDIRKPQPLGDGLEAWCGFYQSIRPTQMGLSLNIDMASAAFIEALPVIEFVAQLLGKDVSSRPLSDSDRVKIKKALRGVKVEVTHRGNVRRKYRVSGLTTQPTRELVFPVDD…
SlAGO10b	MKLELEQKHMVSRTPLQESLNQNAQCQSSGEHSRMEEVKRHNNAGKRRGRRKGKGILVEKMQDNSVCSASSSSERSLVFPRRPGYGQLGTKCLVKANHFIAELSERNLSQYSVRITPEVKCTRLNKAIMAELVKLHKDADLGKRVPVFDGRRTLYTAGLLPFNSKEFTITLGDDDEWIGITKERKFAVTIKLISQANMLQLRELLAGKQVDNPPQALKIIDIVLRELASQRYISVGRFFYSPNIKKPQTLGNGLQSWRGFYQSIKPTQMGLSLNIDMSTTAFIEPLPVVEFVAQVLGKDVSSRPLSDADRIKVKKALRGVKVEVTHRGNIRRKYRISGLTSQPTRELIFPVDEEKNMKSVIEYFQEVYGYTIQYPHLPCLLVGSQKKVNYLPMEACKIL…
SlAGO15	MRNIVWRLITVLSLIKKQSMVSKELFPYLPNFNQMNRPRPGVKGKKIRLLTNYFRVCFQGGISQLYSYNVNILYENGDPVTGSNLIRKVIHKLWEIYSSELGEQVFASDGQQSLFTTSLLPQQKLDFTVVLDAATSKRWKTDGNLSGDGELSEGDQKRQKIISRFKTFRIQINFVSIIPFKTMPDGKHGVKSRNNEVLIALDTILQHSNAKRCILHTDPQKNSLLLRQSYFPNEMKNFMDLTGGILGCRGFHSSFQSVQGGLYFNLDTSTTTLIQPGPLVNFLMANQNVEIPFKIDWTKAKILKNLRIKLLHSNREHKITGLSNRTCKEEKFLLRLRGSNNQNDNGQTVEITVYEYFVRRCGIELGYSSNLPCINVGSQHKPQFIPVELCSLVPLQRFK…
AtAGO1	MVRKRRTDAPSEGGEGSGSREAGPVSGGGRGSQRGGFQQGGGQHQGGRGYTPQPQQGGRGGRGYGQPPQQQQQYGGPQEYQGRGRGGPPHQGGRGGYGGGRGGGPSSGPPQRQSVPELHQATSPTYQAVSSQPTLSEVSPTQVPEPTVLAQQFEQLSVEQGAPSQAIQPIPSSSKAFKFPMRPGKGQSGKRCIVKANHFFAELPDKDLHHYDVTITPEVTSRGVNRAVMKQLVDNYRDSHLGSRLPAYDGRKSLYTAGPLPFNSKEFRINLLDEEVGAGGQRREREFKVVIKLVARADLHHLGMFLEGKQSDAPQEALQVLDIVLRELPTSRIRYIPVGRSFYSPDIGKKQSLGDGLESWRGFYQSIRPTQMGLSLNIDMSSTAFIEANPVIQFVCDLL…
AtAGO2	MERGGYRGGRGDGRGRGGRGYGGGGGGGEQGRDRGYGGGEQGRGRGSERGGGNRGQGRGEQQDFRSQSQRGPPPGHGGRGTTQFQQPRPQVAPQPSQAPASYAGSVGGVAGRGAWGRKPQVPSDSASPSTSTTVVSEPVRVAEVMNLKPSVQVATSDRKEPMKRPDRGGVVAVRRVNLYVNHYKVNFNPESVIRHYDVEIKGEIPTKKVSRFELAMVRDKVFTDNPDEFPLAMTAYDGQKNIFSAVELPTGSYKVEYPKTEEMRGRSYTFTIKQVNVLKLGDLKEYMTGRSSFNPRDVLQGMDVVMKEHPSKCMITVGKSFFTRETEPDEDFRFGVIAAKGYRHTLKPTAQGLSLCLDYSVLAFRKAMSVIEYLKLYFNWSDMRQFRRRDVEEELIGLK…
AtAGO3	MDRGGYRGGRGDGRGRGGGGDRGRGYSGRGDGRGRGGGGDRGRGYSGRGDGHGRGGGGDRGRGYSGRGRGFVQDRDGGWVNPGQSSGGHVRGRGTQLQQPPPQEVPPSSSQAQVSQGVAPGDVGQGGVGDVGRDGVGDVGRDGVGDVGQGGVGDVGQVGVGDVGQGGVGDVGQGGVGDVGRDGVGDVGRDGVGDVGRGGVGDRGQSQSGLSSGHFGRGTQLQQPQPQAVSQSSSQGQVSQSFATGGVGLGAWARKPQLFSDSTVLPSSSSSNVVASHTASGSQVMTPKPSSSDKKEPVKRPDKGGNIKVKGVINLSVNHFRVSFSTESVIRHYDVDIKGENSSKKISRFELAMVKEKLFKDNNDFPNAMTAYDGQKNIFSAVELPTGSFKVDFSETEEI…
AtAGO4	MDSTNGNGADLESANGANGSGVTEALPPPPPVIPPNVEPVRVKTELAEKKGPVRVPMARKGFGTRGQKIPLLTNHFKVDVANLQGHFFHYSVALFYDDGRPVEQKGVGRKILDKVHQTYHSDLDGKEFAYDGEKTLFTYGALPSNKMDFSVVLEEVSATRANGNGSPNGNESPSDGDRKRLRRPNRSKNFRVEISYAAKIPLQALANAMRGQESENSQEAIRVLDIILRQHAARQGCLLVRQSFFHNDPTNCEPVGGNILGCRGFHSSFRTTQGGMSLNMDVTTTMIIKPGPVVDFLIANQNARDPYSIDWSKAKRTLKNLRVKVSPSGQEFKITLSDKPCREQTFELKKRNPNENGEFETTEVTVADYFRDTRHIDLQYSADLPCINVGKPKRPTYIP…
AtAGO5	MSNRGGGGHGGASRGRGGGRRSDQRQDQSSGQVAWPGLQQSYGGRGGSVSAGRGRGNVGRGENTGDLTATQVPVASAVSGGRGRGNIGDPTFSVASSSKTVSVASSSKEESKNTEVSETMSNLQITSTETKPEMTSLPPASSKAVTFPVRPGRGTLGKKVMVRANHFLVQVADRDLYHYDVSINPEVISKTVNRNVMKLLVKNYKDSHLGGKSPAYDGRKSLYTAGPLPFDSKEFVVNLAEKRADGSSGKDRPFKVAVKNVTSTDLYQLQQFLDRKQREAPYDTIQVLDVVLRDKPSNDYVSVGRSFFHTSLGKDARDGRGELGDGIEYWRGYFQSLRLTQMGLSLNIDVSARSFYEPIVVTDFISKFLNIRDLNRPLRDSDRLKVKKVLRTLKVKLLH…
AtAGO6	METSSSLPLSPISIEPEQPSHRDYDITTRRGVGTTGNPIELCTNHFNVSVRQPDVVFYQYTVSITTENGDAVDGTGISRKLMDQLFKTYSSDLDGKRLAYDGEKTLYTVGPLPQNEFDFLVIVEGSFSKRDCGVSDGGSSSGTCKRSKRSFLPRSYKVQIHYAAEIPLKTVLGTQRGAYTPDKSAQDALRVLDIVLRQQAAERGCLLVRQAFFHSDGHPMKVGGGVIGIRGLHSSFRPTHGGLSLNIDVSTTMILEPGPVIEFLKANQSVETPRQIDWIKAAKMLKHMRVKATHRNMEFKIIGLSSKPCNQQLFSMKIKDGEREVPIREITVYDYFKQTYTEPISSAYFPCLDVGKPDRPNYLPLEFCNLVSLQRYTKPLSGRQRVLLVESSRQKPLER…
AtAGO7	MEEKTHHHHHSTNKHIPSSKSRTPLLHKPYHHHVQTNPPPFLLHPSSHQNLNLVASNLPSSYYYYYYCYFYSQFHNSLPPPPPPHLLPLSPPLPPLLPLPPPHSMTRFHKSLPVSQVVERKQQHQQKKKIQVSNNKVSGSIAIEEAALVVAKRPDFGGQDGSVIYLLANHFLVKFDSSQRIYHYNVEISPQPSKEIARMIKQKLVETDRNSFSGVVPAFDGRQNIYSPVEFQGDRLEFFVNLPIPSCKAVMNYGDLREKQPQKKIEKLFRVNMKLVSKFDGKEQRKEGEDWAPLPPEYIHALDVILRENPMEKCTSIGRSFYSSSMGGSKEIGGGAVGLRGFFQSLRHTQQGLALNMDLSITAFHESIGVIAYLQKRLEFLTDLPRNKGRELSLEEKRE…
AtAGO8	MDTTLPPPQHMEREPLKSKSSLLPMTRRGNGSKGQKILLLTNHFRVNFRKPNSHNFFHYSVTITYEDGSPLLAKGFGRKILEKVQQTCQADLGCKHFAYDGDKNLYTVGPLPRSSLDFSVVLETAPSRRNADKRLKLPHQSKKFNVAILFAPPEIPMEAIANALQGKKTKHLLDAIRVMDCILSQNAARQGCLLVRQSFFHNDAKYFANIGEGVDCCKGFHSSFRTTQGGLSLNIDVSTAMIVKPGPVVDFLIANQGVNDPFSINWKKAKNTLKNLRVKVLPSNQEYKITGLSGLHCKDQTFTWKKRNQNREFEEVEITVSDYFTRIREIELRYSGGLPCINVGKPNRPTYFPIELCELVSLQRYTKALTKFQRSNLIKESRQNPQQRIGVLTRALKTS…
AtAGO9	MDSDEPNGSGLPPPPPFVPANLVPEVEPVKKNILLPMARPRGSGSKGQKIPLLTNHFGVKFNKPSGYFFHYSVAINYEDGRPVEAKGIGRKILDKVQETYQSDLGAKYFAYDGEKTLFTVGALPSNKLDFSVVLEEIPSSRNHAGNDTNDADRKRSRRPNQTKKFMVEISYAAKIPMQAIASALQGKETENLQDALRVLDIILRQSAARQGCLLVRQSFFHNDVKNFVPIGGGVSGCRGFHSSFRTTQGGLSLNIDTSTTMIVQPGPVVDFLLANQNKKDPYGMDWNKARRVLKNLRVQITLSNREYKISGLSEHSCKDQLFTWRKPNDKGEFEEVEITVLNYYKERNIEVRYSGDFPCINVGKPKRPTYFPIEFCNLVSLQRYTKSLTNFQRAALVEK…
AtAGO10	MPIRQMKDSSETHLVIKTQPLKHHNPKTVQNGKIPPPSPSPVTVTTPATVTQSQASSPSPPSKNRSRRRNRGGRKSDQGDVCMRPSSRPRKPPPPSQTTSSAVSVATAGEIVAVNHQMQMGVRKNSNFAPRPGFGTLGTKCIVKANHFLADLPTKDLNQYDVTITPEVSSKSVNRAIIAELVRLYKESDLGRRLPAYDGRKSLYTAGELPFTWKEFSVKIVDEDDGIINGPKRERSYKVAIKFVARANMHHLGEFLAGKRADCPQEAVQILDIVLRELSVKRFCPVGRSFFSPDIKTPQRLGEGLESWCGFYQSIRPTQMGLSLNIDMASAAFIEPLPVIEFVAQLLGKDVLSKPLSDSDRVKIKKGLRGVKVEVTHRANVRRKYRVAGLTTQPTRELM…
OsAGO11	MSSRGGGVGGRRGGPGGASSVRGGERGRKRGRGALDAVEPRVPLPRGTGSGPGAGRDGAAAPVPALQPAEADVLSGEVETEMAAGMEAREGASSSSSASAPAVGEVEPPSRAVGALPPTSSKAVVLQARPGFGTVGTSCRVRANHFVVQLADKEIYHYDVAIAPELRSRERNRNIINELLRSHKKYLDGRRSPAYDGRKGMFTAGALPFTDREFVVKIANDPERGNQGEKEFKVTIKCAGAANLYMHSLKQFLAGTYPSQDRFSHKHLDIRILIVALNGGEDISATTFYKAQPVIDFALDYLNMNIRDAYSRFDQDGTRVSVVQYFNRQYSYSLKYINWPCLQAGSDSRPTYLPMEVCRIVKGQRYSRKLNECQVTRMLRLARETPEERENSILEIANE…
OsAGO12	MSSRGGGGGGRRGGRGGGGGREGGGGGGGGGGRGGQGRGDLGVVGERQGGGRGAGERGGRHDAPRGRGGVAVGAGAGRQQQQPFHAPAPPSGGGGRGGVQVQPNAAARRPVGGGRGGVGVPAPAPAVAVGALCGEMKGKMVVSGGAPPAGQGSSLAAAQGTDNVKREPSQVAAPAPAPPPATLPPSSSKAVTFPARPDVGTIGRRCRVRANHFLVQVADKDIYHYDVVITPESTYRERNRSIINKLVALHKQFLDGRLPVYDGRKSIYTAGPLPFKTKDFVVKHINPLRGNQREEEYKVTIKQASKTDLYSLKQFLVGRQRELPQDTIQALDIALRECPTSVNFTCDRYVSISRSFFSQSFGHGGEIGSGTECWRGYYQSLRPTQMGLSLNIDISATAF…
OsAGO13	MPQETIQFGHRGDIGEGLECWRGYYQSLRPTQMGLSLNIDISATSFFKPVTVIQFVEEFLNIRDTSRPLSDRDRVKIKKALRGVRIETNHQEDQIRRYKITGITPIPMSQLMYLSFLCFCYNYLFVYMLFPVDDNGTRKTVVQYFWDRYNYRLKYASWPCLQSGSDSRPVYLPMEVCKIVEGQRYSKKLNNKQVTNILRATCQRPQQREQRIHEMVLHNKYTDDRFAQEFGIKLKYHDSGREKTCAPSVGQWNMINKKMINGGTVDNWTCLSFSRMRPEEVQRFCGDLIQMCNATGMSFNPRPVVDVRSSNPNNIENALRDVHSRTSELLAREGKGGLQLLIVILLEVSGSYGKIKRVCENDLGIVSQCCLPRHASRPNKQYLENVALKINVKKSQQSS…
OsAGO14	MASRGGDGLVGGGRGPLGGRDGRGRGPAGGRGGGRGGGHPQQQQQQQPGYGRGDGGGRGPAPAAGGVVGRGTGGGGGGGRGDGGRGRGRGGGGGDGVRPAMAAAPAASTPGPVAVAARSTPPPTPAVQIPAVASSSSAQPAAAAQPPPAAAAVSALARDVGRQLAVVAGGGRPAPPAAPPAPIPVSSKGVAPPSRPGFGTVGERIVVRANHFLVRVSDNDMIYLYDVSLSPPPKTRRINRVVMSELARLHRESHLGGISFAYDGSKALYTAGKLPFDSMDFKIKLGKELREIEYKVTIRRAGQADLHHLHEFIAGRQRDSQQQTIQALDVVLRESPSLNYVIVSRSFYSTMFGRQDIGDGLECWKGYYQSLRPTQMGLSLNIDISSTPFFKPISVVEYV…
OsAGO15	MALQDEVAQNLRWSMDSARDTASCPSYPSAMDGWMKTGVPKGGREKISCRGFHSSFRPTDSGLSLNVDVSTTMIVRPGPVIEFLLFNQNIKNPHEIDWGKFYLFQDSIYPSAYFSVARTTAQPPGGAPCPTLGLGVRSPRALGVSRTQSSPQQKSAAARAARLAAAELAAARAEAEAAKDAARAAEVEVETLRSSINGSIAGDITADRELEELARARARERAERWAAAHLHGGGGGPRDRAPADGNPDGLGRAGGSPEPARGPRRQHGSLSPDRHHGHHGVQTVVRDFGPGGGWPTLTKTNYIEWAAVMRAVRYGDVDYDEDRRALDALIAAVPPEMQFSLSQKRTAKEAWDAIAAARIGSDRARKSTLQALRKEWENLAFKPGEDVDDFALRLNTLLQ…
OsAGO16	MFEKVKANLPGPPEFLLCVLPERKNCDLYGPWKKKNLHEMGIITQCIVPSVKMNDQYYTNVLLKINAKLGGMNSKLSLEHRHMIPIVNQTPTLILGMDVSHGSPGRADVPSIAAVVGSRCWPLISRYRASVRTQSPKVEMIDSLFKPLDDGKDDGIIRELLLDFYKTSQQRKPKQIIIFRDGVSESQFSQVLNVELNQIIKAYQYMDQGPIPKFTVIIAQKNHHTKLFQENTPDNVPPGTVVDSGIVHPRQYDFYMYAHAGPIGTSRPTHYHVLLDEIGFLPDDVQKLVLSLSYVYQRSTTAISVVAPICYAHLAAAQMGQFMKFEEFAETSSGSGGVPSSSGAVVPELPRLHADVCSSMFFC*
OsAGO17	MESQRMTWLYDRHHSLKHNKAERQAILSTYRLAKRPNLSSEGMIGESCIVRTNCFSVHLESLDDQTIYEYDVCVTPEVGINRAVIRELVKQQKDSGLGGRLPAYDGRKRLYTSGPLPFDSHRFLVLLDSIEDSPEESRHLRVRDFVVTLKFAAKISLWTLRKFRGGKPNRESRAALRALDVVLKELPTARYTQFAGSFYSPNLGECRQLCKVLESWRGFHQRIQATQMGLQLNIDVSSSVFIKPVPVVDYVAQLLNEDILLDRPLCSTEFLKIKEALEGLKVQINGILFNTYHVQDLVHQAASFPVNFSIQYPSLPCLKVAHFGETIFLPLEVCKIAEGQCHQKQLNAKHMAALLQVARQPPNERDYNILQTVHQNKYQEDPHAKEFGIKIEEKLVSIK…
OsAGO18	MASRGGGQHQRHQQQQQQPGGYGRGGGGGRGRGRDGAPYSGGRGRGQDGSYPGGRGGGYGGGGGGGGPPYYGGGGGGGGGGGGQGRGYYDDGGDGRGYQRGMEGGGGRGGYRGDGDGGYGRGGGGYHGDGERGYGRGGGGGGGGGGGYRGDDEGRSSYGRARGGGGGGGGYHGDGEAGYGRGRGGRDYDGGRGGGGRRGGRGGGGSSYHQQPPPDLPQAPEPRLAAQYAREIDIAALRAQFKGLTTTTPGAASSQFPARPGFGAAGEECLVKVNHFFVGLKNDNFHHYDVAIAPDPVLKGLFRTIISKLVTERRHTDFGGRLPVYDGRANLYTAGELPFRSRELEVELSGSRKFKVAIRHVAPVSLQDLRMVMAGCPAGIPSQALQLLDIVLRDMVLAE…
OsAGO1a	MAFQLDNGYYSHQALAMMRKKKTEPRNAGESSGTQQATGAPGRGPSQRPERAQQHGGGGWQPANPQYAQQAGRGGGQHQGRGGRYQGRGGPTSHQPGGGPVEYQAHEYYGRGVQRQGGMPQHRSGSGGHGVPASPSRTVPELHQASQDQYQATVVAPSPSRTGPSSLPVEASSEEVQHQFQELAIQGQSPTSQAIQPAPPSSKSVRFPMRPGKGTFGDRCIVKANHFFAELPDKDLHQYDVSITPEVPSRGVNRAVIGEIVTQYRQSHLGGRLPVYDGRKSLYTAGPLPFTSRTFDVILQDEEESLAVGQGAQRRERPFKVVIKFAARADLHHLAMFLAGRQADAPQEALQVLDIVLRELPTARYSPVARSFYSPNLGRRQQLGEGLESWRGFYQSIRP…
OsAGO1b	MALQLENGRPHHHQVPIMVKKKRTGSGSTGESSGEAPGAPGHGSSQRAERGPQQHGGGRGWVPQHGGRGGGQYQGRGGHYQGRGGQGSHHPGGGPPEYQGRGGPGSHHPGGGPPDYQGRGGSGSHHPGGGPPEYQPRDYQGRGGPRPRGGMPQPYYGGPRGSGGRSVPSGSSRTVPELHQAPHVQYQAPMVSPTPSGAGSSSQPAAEVSSGQVQQQFQQLATRDQSSTSQAIQIAPPSSKSVRFPLRPGKGTYGDRCIVKANHFFAELPDKDLHQYDVSITPEVTSRGVNRAVMFELVTLYRYSHLGGRLPAYDGRKSLYTAGPLPFASRTFEITLQDEEDSLGGGQGTQRRERLFRVVIKFAARADLHHLAMFLAGRQADAPQEALQVLDIVLRELPT…
OsAGO1c	MASRRPTHRHHTEAPDPGGRGRGRGRAARYAQPQPQPQQQQQQQGRGCRARGASPPPPPQQQQQQQPRSTPTRATTVTVASSSSTTATASSSPLAPELRQAIMEAPRPSELAQPSPTPPQEQPVDAATTTPHHIPSSSKSIRFPLRPGKGTIGTRCMVKANHFFAHLPNKDLHHYDVSITPEVTSRIVNRAVIKELVNLYKASYLGGRLPAYDGRKSLYTAGPLPFTSQEFQITLLDDDDGSGSERRQRTFRVVIKFAARADLHRLELFLAGRHAEAPQEALQVLDIVLRELPSARYAPFGRSFFSPYLGRRQPLGEGLESWRGFYQSIRPTQMGLSLNIDMSATAFIEPLPVIDFVAQLLNSDIHSRPLSDAERVKIKKALRGVKVEVTHRGNMRRKY…
OsAGO1d	MGSRRPRLPGFGEDCEPRGGGRGGGGRGRGSYYPQAQQYHPQGHGGRGGAGYYHGAAPQPRGAMVVQQWRPATAAAEHLGHQQPYNSSVRPQHYYGPSAIAPELLQAMDAPHEPPANVSSPEAASPEASSPRSLALEVTEQLQDLSVQYQLSESQEEIVQHVPVSTKSFKFPHRPGSGSIGTRCLVKANHFFAQLPDKDLHQYDVSITPELTSRIRSRAVMEELVRLHKMSYLGGRLPAYDGRKSLYTAGPLPFTSKEFRISLLEEDDGSGSERRQKTYNVVIKFAARADLHRLEQFLAGRQAEAPQEALQVLDIVLRELPTARYAPFGRSFFSPDLGRRRSLGEGLETWRGFYQSIRPTQMGLSLNIDMSATAFFEPLPVIDFVIQLLNTDIRSRPLS…
OsAGO2	MEHERGGGGRGRGRGRGGGRGGGGGDGRGGGYGGAGGGGVGGRGGRGPPGGGGGRGYEPGGGRGYGGGGGGGGRGYGGGGGGGGYESGGGRGYGGGGRGYESGGGRGPGGGGRGHESGGGGGRGGNVWAQPGRGRGGAPAPAPAPAPAARRIQDEGAARSSGTVERIASTEVVRVQPPAPPVAVSRSGTRVPMRRPDGGGSVSKAKVKLLVNHFIVKYRQASTVFHYDIDIKLDISSPKASDKELSKGDFLTVKDELFKDESFRRLSSAVAYDGKRNLFTCAELPDGLFRVKVRSRTYIVSVEFKKKLPLSQLSELPVPREVLQGLDVIVREASSWRKIIIGQGFYSQGRSVPIGPDVVALKGTQQTLKCTQKGLILCVDYSVMPFRKAGPVLDLVQKS…
OsAGO3	MAGRGGRDPRRGYDGGYGYPRGGGGQGGTNRGRDGQRGGGRNGPRGGRFPGGRGVEPRRGGDVLGGGQGGGRGTTAGAGGLVRGGSELAVGAELRRRVPTCHVNDFPELGIGGTPVLVRRWRPRDHRDQHDHQSQRHHHRHHHHQRQRHHHHHQRQQRRGSRTRDPRVRRGPLRIPYGEDEKEEPPATPIASSNKNKREEPPTKHRPMARPPGGGGPLSKGEVKLLVNHFSVDYPKESTFFHYEIRIKLGDGPNRKLSKAELLTVKNELFEHESLQELSSAVAYDGERNLYTCAELPEDCIVPVSKFRVKDSSRTYIVSVKLKKPLPLSQLLEQRPGPRDVMQGLDVIVREASSFGKIVLGQGFYPQSGSEAISDSNIVALKGTQQSLKCTQKGLILCV…
OsAGO4a	MESNSGEIEELPPPPPLPPNAEPIKTDDTKKLSKPKRALMARSGCGKKGQPIQLLTNHFKVSLKAADEFFHHYYVNLKYEDDRPVDGKGIGRKVLDKLQQTYASELANKDFAYDGEKSLFTIGALPQVNNEFTVVLEDFNTGKSSANGGSPGNDSPGNDRKRVRRPYQTKTFKVELNFAAKIPMSAIAQALRGQESENTQEAIRVIDIILRQHSAKQGCLLVRQSFFHNNPSNFVDLGGGVMGCRGFHSSFRATQSGLSLNIDVSTTMIVKPGPVVDFLLANQKVDHPNKIDWAKAKRALKNLRIKTSPANTEYKIVGLSERNCYEQMFTLKQRNGDGEPEGVEVSVYEYFVKNRGIELRYSGDFPCINVGKPKRPTYFPIELCSLVPLQRYTKALSTL…
OsAGO4b	MDAHDGEADELPPPPPVPANVVPIKADDVESEVPANKPAKPKRFPMARPGLGRKGQPIQLLANHYKVSVKSSEEYFFHYNVILKYEDDRPVDGKGVGRKVIDKLQQTYRSELSSKDFAYDGEKSLFTIGALPQVTNEFTVVLEDVSTGKTAANGSPGGNDSPGGSDRKRVRRPYQTKTFKVELCFAAKIPMNAIAQAIKGQESENSQEALRVLDIILRQHSAKQGCLLVRQSFFHNNPNNFVDLGGGVMGCRGFHSSFRGTQSGLSLNIDVSTTMIVKPGPVIDFLLANQKVDHPDRIDWQKAKRALKNLRIRTTPVNSEFKIIGLSDRNCNEQMFSLRQRNGNNGDVDEVEVTVYDYFVKNKGIELRYSGNLPCINVGKPKRPTYFPIELCSLIPLQR…
CsAGO1	MVRKKRTEQPSTGGESSESQETSAGGGRGSQRPSERSAPPSQGGGGGGTGYQGSGRGWGPPSQQGGRGGYGGGRGRGGPQQQHYGGTSEYQGRGRGGPPQPGGRGGYGGGRGGVGMGSGGRGGHSGGPTRSSQIPELHQATPTPFSSGVMTQPTQSQAGSSSHSPELSEVSQQFQQLSLPEEVSSSQVIQPAPPSSKSVRFPLRPGRGSTGTRCIVKANHFFAELPDKDLHQYDVTITPEVTSRGVNRAVMEQLVKLYRESHLGKRLPAYDGRKSLYTAGPLPFLSKEFRITLLDDDDGQGGQRREREFKVVIKLAARADLHHLGLFLQGRQADAPQEALQVLDIVLRELPTTRYCPVGRSFYSPDLGRRQPLGEGLESWRGFYQSIRPTQMGLSLNID…
CsAGO2a	MEREGYRGRGRGRGGRDGGSRGGRTGGGDFRHHQPRPQQPQWRRSAPSPGHGSPSPPVRPWSGPMSPAVRAPSPQPRPQPPPDPSASPVVRPVVAEIQKLKISEPVASSSSSSSHNAARYTPIKRPDGGGTLAIRTVNIFVNHFPVNFTPESTIRHYDIDVKPDIGPNHGRPVKLSKTVLAIVRNKLCEDYPDQFPLSMTAYDGEKNIFSAIELPTGKFNVEFPEGEDMKYRTYVFTIKLVNELKLCKLKEYLTGSLFSIPRDILQGMDVVMKENPSRRMISVGRSFHPVEPFPDDDLGYGLTASRGFQHGLKATSQGLALCLDYSVLAFRKRLPVIDFLQEHINFDVNGFRDWRKVENALKGLKHGFTSDQLQKLIYNMCFTFARCTKPVSLVPPVYY…
CsAGO2b	MEREGYRGRGRGRGGRDGGSRGGSTGGGDFRDHQPRPQQLQWRRSAPSPGHGSSSPPVRPWSGPMSPAVRAPSPQPRPQSPPGPSAAPVVRPPVGEIQKLKISEPVASSSSSSSQNATRYTPIKRPDRGGTLAIRTVNIFVNHFLVNFSPESIIRHYDIDVKPDIGPNHGRPVKLSKTVLAIVRNKLCEDYPDQFPLSMTAYDGEKNIFSAIELPTGKFNVKFLEGEDMKYRTYILTLKLVNELKLCKLNEYLKGNLFSIPRDILQAIDIVMKENPTRCMISVGRSFHPVEPLPDDYLGYGLTASRGFQHGLKPTSQGLVSCLDYSVLAFRKRLPVIDFLQEHINFDVNGFRDWRKVENALKGLKVTVIHRQTKQKYSVAGLTRETTRRLSFTLADPEG…
CsAGO4a	MDSFEPDGNGARDGNGAPDSLPPPPPVIPPDFVPTRVEEQEPAKKKVVRVPISRRGLGSRGQRISLLTNHFKVNVTNVEGHFYHYSVSVSYEDGRPVDGKGAGRKVIDRVQETYNAELDGKDFAYDGEKSLFTVGPLPRNKLEFTVVLEDISSNRNNGNASPDAHGSPNGNDRKRLRRPYRSKTFKVEISFAAKIPIQAIANALRGQESENSQEAFRVLDIILRQHAAKQGCLLVRQSFFHNDPKNFADVGGGVLGCRGFHSSFRTTQGGLSLNIDVSTTMIIQPGPVVDFLIANQNVRDPFSIDWAKAKRTLKNLRIKTITSNQEYKITGLSEKLCKEQMFSLKQKNVKDDDGEVQELEITVYDYFVNNRNIDLRYSGDLPCINVGKPKRPTYIPLEL…
CsAGO4b	MGSPSHKGSEYLPPPPPIIPPNVVPLQSGKVAAPAPKRLPMARRNHGTKGTPMTLLTNHFEVRMRQTEGYFCHYSVALFYEDGHPVDGKGIGRKILDKVQETYSHELEGKHFAYDGEKSLFTLGSFQRKKLEFTIVVEDLSSNRTARNDSPGGDGSPGEGDRKRMRRPSRSKVIRVEISYAAKIPMQAIANALRGQETEHFQEAMRVLDIILRQNAANQGCLLVRQSFFHNNPRNFADLGGGVMGCRGFHSSFRATQSGLSLNMDVSTTMIVKPGPVVNFLLANQNVREPHQIDWNKAKRVLKNLRINTNHSNTEYKITGLSDLPCNQQTFSLKQKSGHNGDSDAIEITVYEYFVNNRHIKLEYSADFPCINVGKPKRASYIPLELCTLVSLQRYTKAL…
CsAGO5a	MSRSGGGGRRPDSRHDQPTQAPAPPFQRGTDRGSHYGSGAAPSSSHAASTSTAPAPSSPSISASAPSSSSVSTLVEETEQKLTLAALAAATPPPSSSQAVGFPVRPGFGTVGRKCVVRANHFMVQLAERDIHHYDVSITPWVTSRKINRQIISQLINLYRLTDLGERIPAYDGMKSIYTAGPLPFESKEFIINLPDSDPRPSSSTRLRERQFRVVIRLASKPDLYTLQQFLRRRHFEAPYEVIQVLAVVLRAAPSEKHTVVGRSFFSTDLGPMGQLGDGVEYWRGYFQSLRPTQMGLSLNIDVSASSFYEPILVTEFVQNYCRDLSHPLSDEVRLKVKKALKGIKVVLTHREYNNSHKITGISSQPMSQLMFTDDSATRMSVIQYFRERYNIALQFTSL…
CsAGO5b	MVQLAEKDIHHYDVSITPWVTSKKINRQIISQLINLYRLTDLGGRIPAYDGMKSIYTAGPLPFQSKEFIIELPDSDPRPSSSTRPIRERQFRVVIRLASKPDLYTLQQFLGRRHFEAPYDVIQVLGVILSAASSEKHTVVGRSFFPTDHGPIGQLGDGVEYWRGYFQSLRLTQMGLSLNIDVSARSFYEPILVTEFVQNYCRNLSRPLSDQVRLKVKKELKGIKVVLTHLETSNSHRITGISSQPMSQLAFTDGSATSMSVIQYFRERYNIALQFTSLPALLAGSEARPIYLPMELSRIVAGQRYTQRLNERQVTALLQATCQRPREREDYIRMMARANAYNEDTLVNKEFGIQVADDLTSVDARILPAPMLKYHETGQEASVNPGFGQWNMINKKMFN…
CsAGO5c	MSRRGGGGRRRDSCRDQPTQAPAPSFQRGGGGAAGPRGRGRQGQRGGAGRGSHSGSGAAPSSPHTASTSTAPAPSSPSVSESSPSSSSVSTLVEETEQKLSLAAPAAATLPPLSSQELRLPVRPGIGTVGRKCVVRANHFMVQLAERDIHHYDVSIDQVQDLESNRYSEVTSKKINRQIISHLINLYGLTNLGGRIPAYDGMKNIYTAGPLPFESKEFIINLPDSDPHPSSSTSPGREGQFRVVIRLASMPDLYTLQQFLRRMHFEAPYHVIQVLDVVLRAAPSEKHTVLGRSFFSADLGPMGQLGDDVEYWRGYFQSLRPTQMGLSLNIDVSASSFYKPILVTEFVQYYCSDLSRPLSDQVRLKVKKALKGIKVVLRHMGYNLNCKITGITSQPMSQV…
CsAGO5d	MYGRGSRNGGQGSSSSSAPASRLSSELEQRLVLQPRPPNTPQPPPPAVQAKPVAAASSSKVVTVKFPPRPSYGTAGTRCLIRANHFLVELTGRDLYHYDVSITPEVTSRGLNRAVMKELLEKHGKTHFNGCLPAYDGRKGFYTAGALPFTSKDFNIKLIDRDESGDIKREREFKVSVKLASRADINHLRQFLQCKSREAPHDIIQVLDVVLRESPSKNCTVVGRSFFAPGFHKSEIGFGVECWKGFYQSLRPTQMGMSLNMDVSATAFYEPISVVDFVAKYLNLGDPRRAASKTFSESDQIKLKKALRGVKVEVAHGESKRYRVSGITSQPTKKLNFLVEDKREKLVIEYFQERYNISLRYASWPALQSGNEPKPIYLPMELCKIVEGQKYSKKLNDRQ…
CsAGO6	MAKAEAGQSPPLPPSPPLMPPNVKPEHVDLPRHSIMSRRGVGNCGRRISLLTNHFKVSVNTTDAVFYHYTVTISGEDKRIAKGKGIGRKVVDKLYQTYSAELAGKRFAYDGEKSLYTVGPLPQNKFEFTVVLEESRAKQQNGSPRGRDSPIGPGKRSKHSFQSKTFMVEISFATKIPLRSIALALKGNEVDNTQDALRVLDIVLRQQAANWGCLLVRQSFFHDDSRNLVDVGGGVSGIRGFHSSFRPTQGGLSLNMDVSTTMILKPGPVIDFLIANQNVREPRFIDWTKAKKMLRNLRVKPRHRNMEFKIVGLSEKPCNQQFFPMKVKSTEGTNEGETLEITVYDYFTQHCRIELTYSAYLPCLDVGKPKRPNYLPLELCSLVSLQRYTKALSSMQRAS…
CsAGO6-like	MGSSVFIGPEESKRTSKLGPTGEKSLFTISALPHKKMEFLVLLDNPSSYRTTSNDSPDGHGSNNERDRKRRRVSQSKTFKVEISVAAKIPLQAIAAALHGQESQNSREAFRVLDIILRQHAAKHMIDHRSISIFLATSYRGCFLVRQSFFQNEPRSFFDLGGGVLGCWGFHSSFQATQGGLSLNIGVKDRNDDVKCVDVTVFDYFVNHRRINLCFSGDFPCIDVGKPRKPTYIPIELCSLLSLQRYTKALTVFQRSALVEKSQQKPQEKMKIITDDSMEHYAQVMRSNKNDSEPMLRSCGISINSRFAQVEGRILSAPRIFVPAAKIDHWAVANFSGGCDIRSLCRDLIRFGEMKRISTSPPLNVFEENPQFRRAPAPVRVDRMFEQMKQKFEKRPCFL…
CsAGO7	MEETADESNANKKCNNNNNTTNSKTRTFRGSANTNPHRHQYQYQYQYQYQYQQHHQLWQYSNHFGFCNQNQYQNYYPALLPLPPTIPLQLALAPPLPQNQSFVSKTHLQKPSCKLHNPSLATSSDTHAHVVNISPEGLCRRNKVAVKGNDGRRITGAKTQALVAARRPDAGGVEGAVISLLANHFLVQLDPSQRIFHYNVEMSPSPSKEVARLIKQKLVEENSSMLSGAYPAFDGRKNIYSPVEFENDRLEFFVSLPIPTSKSVLPSGELKELIHKQHQLKLFRINIKLVSKYDGKELSRYLSKEDNDWIPLPQDYLHALDVVLRENPSEKCIPVGRSLYSSSMGGAKEIGGGAVGLRGFFQSLRPTQQGLSLNVDSSVSAFHESVGVIPYLQKRLEFL…
CsAGO10	MPIRQMKDSSEQHLVIKTHLQNTMNQSQKQPKTAQNGKGPPHQELQNSKPHNQTSPPTKNRGRRRGRGGRKSDQNDVFMRPSSRPCTVAHKPVNQVCDLVGSNANGAVGNGRSLCATEMGFPTSSKSLSFAPRPGYGQVGTKCIVKANHFFAELPDKDLNQYDVTITPEVASRTVNRAIMAELVRLYKESDLGMRLPAYDGRKSLYTAGELPFVWKEFKIKLVDELDGINGPKRVREYKVVIKFAARANMHHLGQFLAGKRADAPQEALQILDIVLRELSTKRYCPIGRSFFSPSIRTPQRLGDGLESWCGFYQSIRPTQMGLSLNIDMASAAFIEPLPVIEFVAQLLGKDVLSRTLSDSDRVKIKKALRGVKVEVTHRGTVRRKYRVSGLTSQPTREL…
PtAGO1a	MVRKRRTEIPQSGGESSESQETDTGRGAQPPAERSGPPQQGGGGGGYQGGRGWGPQSQQGGRGGGYGGRGRGGMQQQQYGGAPEYQGRGRGQPQQGGRGYGGGRPGGGRGGPSSGGFRPPAPELHQATPAPYPAVVTTQPTPSEASSSMRPPEPSLATVSQQLQQLSVEQEGSSSQAIQPLPASSKSVRFPLRPGKGSTGIRCIVKANHFFAELPDKDLHQYDVTITPEVTSRGVNRAVMEQLVKLYRESHLGKRLPAYDGRKSLYTAGALPFQAKDFKITLIDDDDGSGGPRREREFKVTIKLAARADLHHLGLFLRGQQADAPQEALQVLDIVLRELPTARYCPVGRSFYSPDLGRRQSLGEGLESWRGFYQSIRPTQMGLSLNIDMSSTAFIEPLP…
PtAGO1b	MRFPLRPGKGSTGIRCIVKANHFFAELPDKDLHQYDVSITPEVSSRGVNRAVMAQLVKLYQESHLGKRLPAYDGRKSLYTAGALPFQAKEFKIILIDEDDGTGGQRREREFKVVIKFAARADLHHLGLFLQGKQADAPQEALQVLDIVLRELPTARYCPVGRSFYSPDLGRRQSLGEGLESWRGFYQSIRPTQMGLSLNIDMSSTAFIEPLPVIDFVTQLLNRDVSSRPLSDSDRIKIKKALRGVRVEVTHRGNMRRKYRISGLTSQATRELTFPVDERGTLKSVVEYFYETYGFVIQHTQWPCLQVGNQQRPNYLPMEVCKIVEGQRYSKRLNERQITALLKVTCQRPQERERDIMQTVYHNAYHNDPYAKEFGIRISEKLASVEARILPPPWLKYHD…
PtAGO2	MERGGYRGGGRGGHGGRNSGGRRGGYGGGRDGGRGGYDGGRGGSDGGRGGYDGGRGGTDGGRGGTDGGRGGHGGGRGGTDGGRGGTDGGRGGYGGGRGGTDGGRGGYEEGRGGYPRQHWRPNNQGGGGTPGQSVGGAWAARGGHGGDGGTPGQSLGGGGTPGQSVAPNMPKGLASSSSDNANRVSPVQRPDTGGKLAVRTPRLLVNHFPVKFSPKSIIRHYDVDIKQEVPPKHGRPGKISKSILTMIRDKLFTDDPSRFPLGKTAYDREKNIFSAVPLPTGTFRVEVSEAEDAKPRSYLFTIKLVNELQLRKLKDYLDGTLRSVPRDILQGMDVVVKEHPARTMISVGRGFHSVRAHQDYLGYGIIASKGCQHSLKPTSQGLALCLDYSVLSFHEPVSV…
PtAGO3	MKSGQLQIEQLDAEYRSIPRFNNFLWQQLDTLNLSYVGNINGISSLFFAGPNVPKGLASVTANRISPVLRPDKGGKLAVRTPRLLVNHFLVKFNPKSIIRHYDVNIKQEVLPKHGRPGKISKSNLAMIRDKLFADDPSSFPRAMTAYDGEKNIFSAVSLPTGTFKVQVSEAEDAKPRSYLFTIKLVNELELHKLKDYLDGKLRSTPRDILQGMDVVVKEHPARTMISVSRSFHSVRDHQIHLGHGIIASRGCQHSLKPTSQGIALCLDYSVLSFHEPLSVIEFLTKHISGFNLNNFRSFRRAVEGVLKGLKVRVTHRVTKQKYVITGLTRDDAQYITFPQEDPDGKASQNVRLVEYFRQKYHRDIVHQDIPCLEMKSKMKNYVPMEFCVLVEGQVFPKE…
PtAGO4a	MESTEEPEALPPPPSDALPPPPPDALPPPPPEIPPNVVPVQLTTDSVPEETKKISKPKRSPIARRGFGSRGQKIQLLSNHFKVSISNTGGHFFHYCVSLSYEDGRPIDAKGIGRRLIDKVHETYGSDLAGKDFAYDGEKSLFTIGALPRNKMEFTVLLDSFSSNRNSGNGSPVGNGSPNETDKKRMRRAFQSKTFKVEMSFAAKIPMQAIAAALRGQESENSQEALRVLDIILRQHAAKQGCLLVRQSFFHDDPKNYVDLGGGVLGCRGFHSSFRTSQGGLSLNIDGSTTTIIQPGPLIDFLIANQNVSNPFQIDWAKAKRTLKNLRIRVSPTNQEYRITGLSENTCKEQMFSLKSRASDGNDVESVDITVYHYFVNHRSIDLRYSGDLPCINVGKPKR…
PtAGO4b	MESNEEPEALAPPPDALPPPPPEIPPNVVPVQLTTGTFPEETKKTSKLKRSPITRRGVGSRGQKIQLVTNHFKVSISNTGGHFFHYSVSLYYEDGRPVDAKGIGRRLIDKVHETYGSDLAGKDFAYDGEKSLFTIGALPRNKMEFTVLLDSFSSNRNSGNGSPVGNGSPNETDKKRMRRAFQSKTFKVEMSFAAKIPMQAIAAALRGQESENSQEALRVLDIILRQHAAKQGCLLVRQSFFHNNPKNYVDLGGGVLGCRGFHSSFRALQGGLSLNMDGSTTTIIQPGPLIDFLIANQNVSNPFQIDWAKAKRTMKNLRIKVSPTNQEYRITGLSENSCKEQMFSLKSRAADGNDVESFDITVYDYFVNHRSIDLRYSGDLPCINVGKPKRPTYIPVELC…
PtAGO4c	MESADEQNGNGSQEALPPPPPDVPPNVVPVKAEPEPVKKKPLRVPIARRGLGSKGQKMPLLTNHFKVNVTNTEGYFFHYCVSLAYEDGRPVDGKGVGRKVIDRVHETYDTEFGKDFAYDGEKSLFTVGPLPRNKLEFTVVLEDVVSNRNNGNASPDGHGSPNEGDRKRLRRPYHSKTFKVEISFAAKIPMQAIANALRGQESENSQEAFRVLDIILRQHAAKQGCLLVRQSFFHNDPKNFVDLGGGVLGCRGFHSSFRTSQGGLSLNIDVSTTMIIQPGPVVDFLIANQNVRDPFSLDWAKAKRMLKNLRVKASPSNQEYKITGLSEKTCKEQMFQLKQKNGGDGGIEAVEITVYDYFVNHRKIDLRYSGDLPCINVGKPKRPTYIPLELCSLVSLQRY…
PtAGO5a	MERLSVQTEPPAPTQAPAAIPAPQQQKQQQQQLVPASSVKFAQRPDHGTVGSRCLIRANHFLVELADRDLHHYDVSITPEVASRGVNRAIMRELLASNSTHFQSRKPAYDGRKGFYTAGPLTFTSKDFVVTLVDKDDQGSVRKERKFKVTIRLASKTDLYHLKEFLQGRQRGAPHDTIQVLDVVLRESPSNKQVCTIVGRSFFTAGLGGQNEIGNGIECWKGFYQSLRPTQMGMSLNIDVSVAAFYEPILAVDFVAKLLNLGDPIRAATRPLSDSDRAKLKKALRGVRVKVTHGEEKRYKITGISASATNQLRFAAEDGKQKSVVQYFLEKYNIRLRFASWPALQSGNDSRPIFLPMECCKIIEGQRYSKKLNEKQVTALLREACRRPVEREHSIEQIV…
PtAGO5b	MSRRGGGRRSETRRDQDSSAPSPSFQRGGGGGGRGRGGRGVSTPAPSPTPVRAPTSAAPGYLSATAGPSAKPTPQAAYTAAAASSSSSVGELSQETAKKLTLGGLVPVSSKAIVPPRRPDYGKIGKKCVIRANHFVVEVSDRDLFHYDVAITPEITSKKVNRDVISQLVRSYRESHLGNRMPAYDGRKSLYTAGALPFEAKEFVVKLAERGDPASSSSSVKKERQFKVAIKYASKVDMYHLKEFLSGRQADAPQETIQILDIVLRASPSEKYITVGRSFFSPDLGPKGDLGDGIEYWRGYYQSLRPTQMGLSFNIDVSARSFYEPILVTEFVAKYFNFRDLSRPLSDQERVKVKRALRGIKVQITYSDYTKSYKVTGISNLPVNKTMFTLDDKKTKVSV…
PtAGO5c	MSRRGGGRRSSEPRPDQGSSTPSPSFQRGGGGDRGRGRGRRGGFTPAPSPTPVRAPPPAASGYLSATAGPSTSSTPQEMASSSNAPPPSASSSASMEELSQEIAKKLSFGSTSATGGSVPVSSKAIVPPPRPQLGRIGRKCTIRANHFVVEVSDRDLFHYDVAITPEITSKKVNRDVISQLVRSYRESHLGNRMPAYDGRKSLYTAGALPFEAKEFVVKLVEKNDPASSSSSVKKERQFNVAIKYASKVDMHHLKEFLSGRQKDVPQETIQILDIVLRASPSEKYVTVGRSFFSLDLGKKGELGNGIEYWRGYYQSLRPTQMGLSLNIDVSARSFYEPILVTEFVAKYFNLRDLSRPLSDQDRVKVKRALRGIKVEISYRDYARSFKVTGISNLPVDKT…
PtAGO7	MEETEESSGNKKCTTKTRTFRGRTNTHKHHYHQYQYQYQYHYHYQHQLLQYSNQYGFFNHNQYPGYYPALLPLPPPIPLQLALTPPLPQNHSFISKTQLQKPLCKLNNPPPPPPSPAPPTSSDTKGPAVTTSPAFEGLQQQKNRPLKGDGGRKVMSATTQSLVVARRPDSGGVEGSVITLLANHFPVQFDSSQRIFHYNVEISPNPSREVARMIKQKLVKENSAVLSGALPAYDGRKSLYSPVEFQKDRLEFYVSLPIPTTKSSLPFGEFNFLQEKHQQLKLFRINIKLVSKLDGKELSRYLSKEGDDWIPLPQDYLHALDVVLRESPMERCLPVGRSLYSSSMGGTKEIGGGAVALRGFFQSLRPTQQGLALNVDFSVTAFHESIGVIPYLQKRLEFL…
PtAGO10a	MPVRQMKESSEQHLVIKTHMQNSMNQPQKHHKTAQNGKGPPQPLQESSNTKPQNQASPPAKNRGRRRGRGGRKSDQGDVCTRPSSRPCTVAHKPVLNPTGDLLANASNGHIENSKNVCEMEMGLGFPTSSKSLSLAPRPGYGQVGTKCIVKANHFLAELPDKDLNQYDVTITPEVASRTMNRDIMAELVRLYKDSDLGMRLPAYDGRKSLYTAGELPFAWKEFIIKLIDEEDGINGPKRGREYKVVIKFVARANMYHLGQFLAGKRADAPQEALQILDIVLRELSSKRYCPVGRSFFSPDIRAPQRLGDGLESWCGFYQSIRPTQMGLSLNIDMASAAFIEPLPVIEFVAQLLGKDILSRPLSDSDRVKIKKGLRGVKVEVTHRGSVRRKYRVSGLTSQ…
PtAGO10b	MPIRQMKESSEQHLVIKTHMQNSINQPQKHHKTAQNGKGPPQPLQESSNTKPQNQTSPPAKNRGRRRGRGGRKSDQGDVCMRPCSRPCTVVHKPVVNPIGDLLSTTSSGPIETGKNVCEMEMGPGFPTSSKSLSFARRPGYGQVGSKCIVKANHFFAELPDKDLNQYDVTITPEVASRTVNRAIMAELVRLYKESDLGMRLPAYDGRKSLYTAGKLPFAWKEFAIKLVDAQDGISGPKREREYKVVIKFVARANMYHLSQFLAGKHADAPQEALQILDIVLRELSTKRYCPVGRSFFSPDIRAPQRLGDGLESWCGFYQSIRPTQMGLSLNIDMASAAFIEPLPVIEFVAQLLGKDVLSRPLSDSDRVKIKKGLRGVKVEVTHRGSVRRKYRVSGLTSQ…
PtAGO15	MESSDSRKDLPPPPAIIPADVVKTELGPTCEQTKKAATPKRVPMARRGYGAKGQRIQLLTNHFKVAVPKSNDHFYQYSVALFYEDGHPTDGKGIGRKVMDKVQETYDSELEGKQLAYDGEKTLFTTGSLPHNKLEFTVVLEDVSLTRGGDNDSSRGNGSPSESDQKRRKRPYHSKTIKVQISYATKIPVQAIAAVLQGQESEHFQEAVRVLDIVLRQNAARQGCLLVRQSFFHNNPRNFVELGGGVMGCRGFHSSFRAAQDGLSLNIDVSTTMIVKPGPVVDFLIMNQNVRDPYHIDWTKAKRMLKNLRIKTNHSNTEYKITGLTEKSCREQTFSLNQRSGRDGDGEVQTIEVTVYDYFVNHRNMGLQYSADFPCINVGKPKRPSYFPLELCNLVSLQR…
PtAGO16	MEKISGGSPPPPPPPSVPANMNPELVEVPRHPERSAIPKYSMISRRGVGTSGRHISLLTNHFKVSVNVPDAVFYQYNVSITSEDNRAVESKGIGRKLIDRLYQTYSSEFAGKRFAYDGEKSLYTVGPLPQNKSEFTVVLEESFAKHESGSPGGGESPPAAVKRSKRSYRSKTFKVETSYAAKIPLKSIALALKGIEIDNSTQDALRVLDIILRQQAANRGCLLVRQSFFHDDSRNFNDVGGGVTGVKGFHSSFRTTQGGLSLNMDVSTTMILTPGPVIDFLIVNQNVREPRYVDWVKARRMLKNLRVKTKHNNMEFKIIGLSEKPCNQQYFPMKLKNRDGANVEAQIVEVTVYDYFTKHCGIQLGYSAYLPCLDVGKPKRPNYLPLELCSLISLQRYKK…
VvAGO1	MVRKRRTELPTASSGESSESTQEASGASGGGRGWAPQSQQSGRGGYAGGRGPQRGGMAPQQQYTVPTEYQGRGRGGGAPPQQPPAAAAAYESGSRSRARVGGGRGVEPVSSGGPPSKPLSSDLHQATQASYAAGGTPHRVPSEASSSRQAAESLTQQLQKVSIQQEVPPSQAIQPVAPSSKSMRFPLRPGKGVTGKKCIVKANHFFAELPDKDLHQYDVSINPEVTSRGVNRAVMEQLVKLYRESHLGKRLPAYDGRKSLYTAGPLPFISKEFMITLIDEDDGTGAPRREREFKVVIKLAARADLHHLGLFLQGRQADAPQEALQVLDIVLRELPTTRYCPVGRSFYSPDLGRRQPLGEGLESWRGFYQSIRPTQMGLSLNIDMSSTAFIEPLPVIDFV…
VvAGO2a	MEGRGGRGRGRGRGDGGGGGSGWRGRGRGRGWGQPTQPWRPSNPVQQPSSNPVGQPVQRWVPNPVQQPQPPTIAPATAAPVGQPVQLWVPNPVQQPQRPTFVPATAATVELPTSSHHDKEAGDKRIPMRRPDKGGTNAVRSVSLRVNHFPVKFKSNRLIMHYDVDIKPEAPPKGRAVKISKATLYMIREKLCVDHPSQFPTSKIAYDGEKNIFSAVELPTGKFKVEISGGEEMKVCSFIVTINLVKQLELQKLSDYLSGVLSFVPRDILQGMDVVMKENPARHMISSGRSFYQFKDSGKDELGYGIIASRGFQHSLKPTAQGLSLCLDYSVVPFFNPISVLEFLKEHVRGFSLREFKRYRSKVEATLKGLKVRVTHRNTGQKFIIAGLTSQDTQNLSFL…
VvAGO2b	MEGRGGRGRGRGGGGVGGGYGWRGRGRGRGRGRGQPTQPWRPSNPVQQPSSNLVGQPVQRCIPNPVQQPQHPPIAPATDATVELPTSSHHVKEAGDKRIPMRRPDKGGTNAVRSVPLRVNHFPVKFKSDGLNMHYDVDIKPEAPPKKGRAVKISKSTSYMIREKLCVDHPSQFPASEIAYDGEKNIFSAVELPTGKFKVEISGGEEMKVCSFIVTINLVKQLELQKLSDYLSGVLSFVPRDILQGMDVVMKENPARHMISSGRSFYQFKDSGKDELGYGIIASRGFQHSLKPTAQGLSLCLDYSVVPFFNPISVLEFLKEHVCDFSLREFKRYRSEVEAALKGYKVRVTHRNTGQKFIVAGLTSEDTRNLSFLPEDPEGNVLPKKVMLVDYFYEKYGKD…
VvAGO3	MGHDRDYYHYGGSSDRYGGNGGGGWRSSGLSPRNSPAWRPLPPSPPRRPLPLPSPPRRPLPPLSPPRRHPPPLSPPRRHLPPSSPPRRPLPPPSPPRRPLPSMPAFVESRRSPDTVPEMEPSKLLGSLTPTSSLERMDRVLPIRRPDKGGTNAIQSTMVRVNHFPVKFNSEKIILHYDVDIKPEVLPKHGRTLKLSKSNRCMIKEKLFSDDPSRFPLSRTAFDGEKNIFSVVELPTGKFKVEFSESEDMKICSYIFTIKLVNQLELRKLKDYLSGKLFSIPREILQGMDVVMKENPARHMISVGRSFYPTLFSLDDDLGHGIVASRGFLHSLKPTAQGLTLCLDYSVLAFRKPIPVIDFLEEHVNGFKLNDLRRVRKEVEVALKGLKVRVIHRLCKQKY…
VvAGO4	MDSGEDGNGAQDALPPPPPVPPNVVPIKADSVASEPVKKKVARVPIARRGFASKGQKIALTTNHFKVNVTGADGHFFHYSVSLSYEDGRPVDGKGIGRKVIDRVHETYDSELGGKDFAYDGEKSLFTVGPLPRNKLEFTVVLEDVSSNRNNGNGSPDRGSPNESDRKRMRRPYQSKTFKVEISFAAKIPMQAIANALRGQESENSQEALRVLDIILRQHASKQGCLLVRQSFFHNDPKNFIDLGGGVLGCRGFHSSFRTTQGGLSLNIDVSTTMIVQPGPVVDFLIANQNARDPFSLDWAKAKKMLKNLRVKTSPSNTEYKITGLSEKPCKEQLFTLKQRNGKDENGEAQTIEVTVFDYFVNHRRIELRYSADLPCINVGKPKRPTYFPIELCTLVSLQ…
VvAGO5	MSRRGGAGGRRSDSRRDQTSQAPGPSFNRGGEGGRGGGGGRGGGGGRGGGGGRGRGSGAAAAGGSRPASEPHSPAAFPPLASPSPSASTSTASLSQKFDQSLTLQSPAPVRRQPSDPVRPQPQPHPQPPPPVQAQPTPPVPTQPQPSSSYQASSSSQATGVEVPPSTSKAITFPRRPGYGTVGRKCKVRANHFQVQVDDREFCHYDVTITPEVMSKTLNREIIKQLVDLYKVSHLGKRSPAYDGSKSLYTAGPLPFTSKEFVVKLVKTDDGAGPRREREFKVAIKLASKGDLYQLQQFLCGRQLSAPQETIQILDVVLRASPSEKYTVVGRSFFSTQLGRKGELGDGLEYWRGYYQSLRPTQMGLSFNIDVSARSFYESILVTDFVAKHLKLRDVSRAL…
VvAGO6	MESQKPPNAEPAKRSSSIPNRLPMARRGLGRTGETIQLVTNHFKVSMHSNANTGAHFYQYNVSLAHEDGHPADAKDIGRKVMDKVHETYHTEMAGMSFAYDGEKSLFTIGSLPSKKLRFTVVLEDASSNRYKCTFPDDGSDRKRSRRPYHSKTFNVEISFAAKFPMDSIVRASYGQPSKHLQDAARVLDIILRQHAAKKGCLVVRQSFFDNLPRNFTPLGGGVLGCRGFNSSFRATQGGLFLNMDVSTTLVIQPDPVRDFLVSNQNVKDMYHIDWSKAKRMLKNLRVKTLHSNAEWKISGLSERTCRNQTFLMKQRNEGPDGDEVRSVEVTVYDYFVKHRKISLQYSGDFPCINVGRSKHPVYIPLELCTLVSLQRYTKPLSTQQRSSLVEKSRQKPQE…
VvAGO7	MEETDKSNANKKCTPKGRSFSGRTNPNDHQLFQYSNPFRFSNQNQYRSYSALLPPPPPIPLQPTATPPLPQNQNFRSKAHLQKPSWKHDNPPRATSSDTQVSLLTVSTEDTERRASFSPRGENGRKVMAATQAMVTARRPDSGGIEGPVISLLANHFLVQFDSSQRIFHYDVEISPNPSKEVARMIKRKLVEEKSVELSGALPAFDGRKNLYSPVEFQNDRLELFIEKHPQIKLFRINIKLVSKFDGKELNSYLSKEGDDWIPLPQDYLHALDIVLRESPTEKCVPVGRSLYSSSMGGTKEIGGGAVGLRGFFQSLRPTQQGLALNVDFSVTAFHESIGIIPYLQKRVEFLRDLSQRKTRGLTGEERKEVEKALKNIRVFVCHRETVQRYRVHSLTEET…
VvAGO8	MSRRGFGSKGQKISLLTNHFKVGITNASGHFFHYSVALTYEDGRPVEMKGVGRKIMDKVHETYDTELSGKDFAYDGEKSLFTVGALPHNKLEFTVVLDSVSSNRNTRNGSPDVNGSPNGGDRKRPRRASQSKTFKVEISFAAKIPMQAIASALRGQESENSQEAIRVLDIILRQHAAKQGCLLVRQSFFHDNSRNFTDLGGGVLGCRGFHSSFRATQGGLSLNVDGSTTTIIQPGPLVDFLIANQNARDPFQLDWSKAKRTLKNLRIKVKPSNSEYRIVGLSESPCKEQMFTLKNRGKNGNDDAESIEVTVYDYFVNYRQIELRYSGDLPCINVGKPKRPTYLPIELCFLVSLQRYTKALTVHQRSTLVERSRQKPQEKMTILTDVMKSNNYEADSLLR…
VvAGO9	MPFCISFLSFVFPFFLWASLKVPYSLFYFALFISSFKWLDVVSITPEVTSRVLSRSLIKELVHLYGQSHLYRNPAYDGRRGIYTAGPLPFTSKEFMIKLEEGNDGTHERKKKEFIVKIRFATSTDIHNLREFLLSRQSNVPYEIIHALDVVLKDSLSNNRCTLSGKTFFPLGLGARSEIGNGVQCWNGFYQSLRPTQMGLSLNIDVSSKSFYEPIPVIEFAAKFLNLEDPSIMARMPLSNDDRLKLKKVLKGIKVEVTHGGQRRYKIFDITEQPTNQLRFTEDGQQKSVIQYFREKYNIVLRYASWPSLRSGKDSRPIYLPMETCTIVAGQRYAKKLNERQVASMLRMTCQRPWRRQEIIHQIADQDDYIRNDFVKEFGVNVSVDMAAIDARVLPPPAL…
VvAGO10a	MPMRQMKESSEQHLVIKTHLQNSMNPVQKPPKTAQNGKGPPSHEPQNAKPHSQTSPSSKNRGRRRGRGGRKSDQSDVFMRPSSRPCTVADKPVLAHQAGPLMGFPSSSKSLTFAPRPGYGQLGTKCIVKANHFFTELPEKDLNQYDVTITPEVSSRTVNRAIMNELVKLYKESDLGMRLPAYDGRKSLYTAGELPFAWKEFKVKLVDEEDGINGPKREREYKVVIKFVARASLHHLGQFLAGKRADAPQEALQILDIVLRELSTRRYCPVGRSFFSPDIRAPQRLGEGLESWCGFYQSIRPTQMGLSLNIDMSSAAFIEALPVIEFVGQLLGKDVLSRPLSDSDRVKIKKALRGVKVEVTHRGNVRRKYRVSGLTSQPTRELVFPVDDNSTMKSVVEYF…
VvAGO10b	MPSTEESLENAKRSIGRRKGRRRGKGAKVEQLQDPKLDLSVGSHDSSKGLVFHRRPGYGQLGRKCVVKANHFLAQVPDTDLSQYSVTITPEVASRKINKSIMAQLVKLHRDTDLGMRLPVYDGKRVLYTAGLLPFVSKEFTVKLVEEDEGTGITKEREFKVTIKFVGITSMVQLREFLAGKQVDTPHEIIRIFDIVLNQLAAQRYVSVGRCLYSPDIKNPQQLGGGLQSWQGFYKSIRPTQMGLSLNIDMSSTAFIEPLPVIDFVAQLLDKDVFSRPLSDADRVKVKKALRGVKVEVTHRGNVRRKYRISGLTSQPTRELIFPVDEQMNMKSVVEYFQEMYGFTIRYSHLPCLQVGNQRKVNYLPMEACKIIGGQRYTKGLTDKQITSLLKVTCQRPRD…
VvAGO11	MKIEKELKFYCFNCKMEKTGIEEASGTPPLPPSPSIPPNVKPEQVGPPKRSVISRRGVGTAGRRISLLTNHFKVSMNISDAMFYQYSVSITSEDKRVVDGKGIGRKVIDRLYLTYSSELAGKKFAYDGEKSLYTVGPLPQNNFEFTVVVEELLARRHVLCPIPSGNGKRPKCSFRSKTFKVAISYAAKIPLKSIVLALKGSEVDNNAQDALRVLDIILRQQAANRGCLLVRQSFFHDDSRHFTDVGGGVTGCRGFHSSFRTTQGGLSLNMDVSTTMILTPGPVIDFLLAKKMLKNMRIKTKHSNMEFKITGLSEKPCNLQHFPLKMRNSDDANDEDQTVEITVYEYFTKHRGIELSISAYMPCLNVGKPKRPNYLPLELCLLVSLQRYTKALSIMQRST…
