# Supplementary material for: RNA Interference Pathways in <em>Juglandaceae</em>: Based on Gene Diversity, Evolution, and Functional Differentiation
Source: Preprints.org preprint supplement (doi:10.20944/preprints202210.0323.v1), 2022-10-21
Supplement: Supplementary file 2 [file Supplementary table 2.xlsx]

## Sheet: walnut
Supplementary table 2A
Chr A	gene A	Chr B	gene B	Ka	Ks	Ka_Ks	Myr
Jr05	JrAGO4a	Jr14	JrAGO4c	0.0362316	0.431986	0.0838723	14.3995
Jr05	JrAGO4a	Jr14	JrAGO4b	0.0362316	0.431986	0.0838723	14.3995
Jr05	JrAGO5a	Jr14	JrAGO5b	0.119891	0.546128	0.219529	18.2043
Jr06	JrAGO1a	Jr15	JrAGO1b	0.0501571	0.38566	0.130055	12.8553
Jr07	JrAGO10a	Jr12	JrAGO10c	0.0254768	0.270657	0.0941296	9.02189
Jr08	JrDCL2a	Jr11	JrDCL2b	0.0961349	0.337801	0.284591	11.26
Jr01	JrDRB3-5.3	Jr10	JrDRB3-5.1	0.096138	0.301733	0.31862	10.0578
Jr05	JrDRB2.1	Jr14	JrDRB2.2	0.0899351	0.369092	0.243666	12.3031
Jr01	JrDRB3-5.4	Jr01	JrDRB3-5.3	0	0	NaN	0
Jr06	JrDRB7.4	Jr06	JrDRB7.2	0.014103	0.027781	0.507649	0.926032
Jr08	JrDRB1.2	Jr08	JrDRB1.1	0	0	NaN	0
Jr14	JrAGO4b	Jr14	JrAGO4c	0	0	NaN	0
Jr14	JrAGO4c	Jr14	JrAGO4b	0	0	NaN	0
Jr15	JrAGO1b	Jr15	JrAGO1c	0.0670713	0.22739	0.294961	7.57968
Jr15	JrAGO1c	Jr15	JrAGO1b	0.0670713	0.22739	0.294961	7.57968
Jr16	JrRDR1h	Jr16	JrRDR1i	0.121333	0.24343	0.498432	8.11433
Jr16	JrRDR1h	Jr16	JrRDR1g	0.127544	0.296992	0.429451	9.89973
Jr16	JrRDR1h	Jr16	JrRDR1f	0.140149	0.289531	0.484056	9.65103
Jr16	JrRDR1h	Jr16	JrRDR1e	0.134782	0.337897	0.398885	11.2632
Jr16	JrRDR1d	Jr16	JrRDR1e	0.0367362	0.042072	0.873174	1.4024
Jr16	JrRDR1i	Jr16	JrRDR1g	0.0583311	0.144375	0.404026	4.81249
Jr16	JrRDR1i	Jr16	JrRDR1h	0.121333	0.24343	0.498432	8.11433
Jr16	JrRDR1i	Jr16	JrRDR1f	0.139004	0.280022	0.496406	9.33405
Jr16	JrRDR1i	Jr16	JrRDR1e	0.155885	0.321916	0.48424	10.7305
Jr16	JrRDR1g	Jr16	JrRDR1i	0.0583311	0.144375	0.404026	4.81249
Jr16	JrRDR1g	Jr16	JrRDR1h	0.127544	0.296992	0.429451	9.89973
Jr16	JrRDR1g	Jr16	JrRDR1f	0.125981	0.300392	0.419388	10.0131
Jr16	JrRDR1f	Jr16	JrRDR1e	0.00661222	0.00406643	1.62605	0.135548
Jr16	JrRDR1g	Jr16	JrRDR1e	0.139968	0.355065	0.394204	11.8355

## Sheet: to Osat
Supplementary table 2B
Chr A	gene A	Chr B	gene B	Name	Ka	Ks	Ka_Ks	Myr
Osat-2	Osat-transcript:Os02t0736200-01	Jreg-Chr16	Jreg-Jr16_06830_p1	JrRDR1d	0.28409	2.7547	0.103129	91.8234
Osat-6	Osat-transcript:Os06t0597400-01	Jreg-Chr01	Jreg-Jr01_29210_p1	JrAGO10b	0.183853	NaN	NaN	#VALUE!
Osat-10	Osat-transcript:Os10t0480500-01	Jreg-Chr14	Jreg-Jr14_13750_p1	JrDRB2.2	0.320938	1.47147	0.218107	49.049

## Sheet: to Atha
Supplementary table 2C
Chr A	gene A	Chr B	gene B	Name	Ka	Ks	Ka_Ks	Myr
Atha-1	Atha-transcript:AT1G14790.1	Jreg-Chr16	Jreg-Jr16_06830_p1	JrRDR1d	0.310514	2.36811	0.131123	78.9371
Atha-1	Atha-transcript:AT1G48410.3	Jreg-Chr15	Jreg-Jr15_11560_p1	JrAGO1b	0.152829	1.93338	0.0790479	64.4459
Atha-1	Atha-transcript:AT1G69440.1	Jreg-Chr13	Jreg-Jr13_14910_p1	JrAGO7	0.213234	2.31774	0.0920009	77.2581
Atha-2	Atha-transcript:AT2G19910.1	Jreg-Chr01	Jreg-Jr01_27830_p1	JrRDR3	0.412375	1.69493	0.2433	56.4975
Atha-2	Atha-transcript:AT2G27040.1	Jreg-Chr14	Jreg-Jr14_14640_p1	JrAGO4b	0.17356	2.89961	0.0598563	96.6535
Atha-2	Atha-transcript:AT2G27040.1	Jreg-Chr14	Jreg-Jr14_17740_p1	JrAGO5b	0.656652	2.82022	0.232837	94.0073
Atha-2	Atha-transcript:AT2G27880.1	Jreg-Chr05	Jreg-Jr05_13150_p1	JrAGO5a	0.279958	NaN	NaN	#VALUE!
Atha-2	Atha-transcript:AT2G27880.1	Jreg-Chr14	Jreg-Jr14_17740_p1	JrAGO5b	0.299528	2.52999	0.118391	84.3331
Atha-2	Atha-transcript:AT2G28380.1	Jreg-Chr05	Jreg-Jr05_09960_p1	JrDRB2.1	0.207441	2.27465	0.0911971	75.8216
Atha-2	Atha-transcript:AT2G28380.1	Jreg-Chr14	Jreg-Jr14_13750_p1	JrDRB2.2	0.198364	2.43921	0.081323	81.3069
Atha-2	Atha-transcript:AT2G32940.1	Jreg-Chr10	Jreg-Jr10_13510_p1	JrAGO6	0.233306	1.39356	0.167417	46.452
Atha-3	Atha-transcript:AT3G26932.2	Jreg-Chr01	Jreg-Jr01_01240_p1	JrDRB3-5.3	0.364111	1.59746	0.227932	53.2485
Atha-3	Atha-transcript:AT3G26932.2	Jreg-Chr10	Jreg-Jr10_00540_p1	JrDRB3-5.1	0.401645	1.8432	0.217907	61.4399
Atha-4	Atha-transcript:AT4G20910.2	Jreg-Chr03	Jreg-Jr03_17090_p1	JrDRB7.1	0.354607	1.44496	0.245408	48.1655
Atha-5	Atha-transcript:AT5G21150.1	Jreg-Chr14	Jreg-Jr14_14640_p1	JrAGO4b	0.192753	1.95333	0.0986794	65.111
Atha-5	Atha-transcript:AT5G41070.1	Jreg-Chr01	Jreg-Jr01_01240_p1	JrDRB3-5.3	0.317694	2.16802	0.146536	72.2674
Atha-5	Atha-transcript:AT5G43810.1	Jreg-Chr07	Jreg-Jr07_24420_p1	JrAGO10a	0.0931462	NaN	NaN	#VALUE!
Atha-5	Atha-transcript:AT5G43810.1	Jreg-Chr12	Jreg-Jr12_15330_p1	JrAGO10c	0.0919194	NaN	NaN	#VALUE!

## Sheet: to Slyc
Supplementary table 2D
Chr A	gene A	Chr B	gene B	Name	Ka	Ks	Ka_Ks	Myr
Slyc-SL4.0ch01	Slyc-Solyc01g010970.3.1.ITAG4.0	Jreg-Chr13	Jreg-Jr13_14910_p1	JrAGO7	0.163098	1.69638	0.096145	56.5459
Slyc-SL4.0ch02	Slyc-Solyc02g069260.3.1.ITAG4.0	Jreg-Chr03	Jreg-Jr03_09750_p1	JrAGO2a	0.371079	1.79586	0.20663	59.8621
Slyc-SL4.0ch02	Slyc-Solyc02g069260.3.1.ITAG4.0	Jreg-Chr04	Jreg-Jr04_15030_p1	JrAGO2b	0.356371	1.66627	0.213873	55.5424
Slyc-SL4.0ch02	Slyc-Solyc02g070030.4.1.ITAG4.0	Jreg-Chr03	Jreg-Jr03_17090_p1	JrDRB7.1	0.307542	1.17228	0.262346	39.0758
Slyc-SL4.0ch03	Slyc-Solyc03g098280.4.1.ITAG4.0	Jreg-Chr06	Jreg-Jr06_16920_p1	JrAGO1a	0.100223	1.95947	0.051148	65.3155
Slyc-SL4.0ch03	Slyc-Solyc03g098280.4.1.ITAG4.0	Jreg-Chr15	Jreg-Jr15_11560_p1	JrAGO1b	0.12304	1.89091	0.0650695	63.0303
Slyc-SL4.0ch04	Slyc-Solyc04g076420.4.1.ITAG4.0	Jreg-Chr08	Jreg-Jr08_07480_p1	JrDRB1.1	0.423058	1.71379	0.246855	57.1264
Slyc-SL4.0ch06	Slyc-Solyc06g072300.4.1.ITAG4.0	Jreg-Chr06	Jreg-Jr06_16920_p1	JrAGO1a	0.0876518	1.98523	0.044152	66.1743
Slyc-SL4.0ch06	Slyc-Solyc06g072300.4.1.ITAG4.0	Jreg-Chr15	Jreg-Jr15_11560_p1	JrAGO1b	0.1081	1.95687	0.0552414	65.2291
Slyc-SL4.0ch06	Slyc-Solyc06g074730.4.1.ITAG4.0	Jreg-Chr05	Jreg-Jr05_13150_p1	JrAGO5a	0.34583	3.06536	0.112819	102.179
Slyc-SL4.0ch06	Slyc-Solyc06g074730.4.1.ITAG4.0	Jreg-Chr14	Jreg-Jr14_17740_p1	JrAGO5b	0.323123	2.38133	0.13569	79.3777
Slyc-SL4.0ch06	Slyc-Solyc06g074730.4.1.ITAG4.0	Jreg-Chr14	Jreg-Jr14_14640_p1	JrAGO4b	0.607869	2.53297	0.239983	84.4324
Slyc-SL4.0ch07	Slyc-Solyc07g049500.3.1.ITAG4.0	Jreg-Chr10	Jreg-Jr10_13510_p1	JrAGO6	0.191564	1.55065	0.123538	51.6883
Slyc-SL4.0ch09	Slyc-Solyc09g082830.4.1.ITAG4.0	Jreg-Chr07	Jreg-Jr07_24420_p1	JrAGO10a	0.0832501	1.54589	0.0538525	51.5297
Slyc-SL4.0ch09	Slyc-Solyc09g082830.4.1.ITAG4.0	Jreg-Chr12	Jreg-Jr12_15330_p1	JrAGO10c	0.0831355	1.48918	0.0558266	49.6392
Slyc-SL4.0ch10	Slyc-Solyc10g005125.1.1.ITAG4.0	Jreg-Chr07	Jreg-Jr07_10040_p1	JrDCL1	0.164584	1.50931	0.109046	50.3105
Slyc-SL4.0ch11	Slyc-Solyc11g008520.3.1.ITAG4.0	Jreg-Chr11	Jreg-Jr11_11410_p1	JrDCL2b	0.312473	1.64536	0.189912	54.8453
Slyc-SL4.0ch11	Slyc-Solyc11g069460.2.1.ITAG4.0	Jreg-Chr05	Jreg-Jr05_09960_p1	JrDRB2.1	0.220932	1.6701	0.132287	55.6699
Slyc-SL4.0ch11	Slyc-Solyc11g069460.2.1.ITAG4.0	Jreg-Chr14	Jreg-Jr14_13750_p1	JrDRB2.2	0.221384	1.57954	0.140157	52.6515
Slyc-SL4.0ch12	Slyc-Solyc12g006790.3.1.ITAG4.0	Jreg-Chr01	Jreg-Jr01_29210_p1	JrAGO10b	0.167229	1.63718	0.102144	54.5728
Slyc-SL4.0ch12	Slyc-Solyc12g006790.3.1.ITAG4.0	Jreg-Chr01	Jreg-Jr01_29210_p1	JrAGO10b	0.167229	1.63718	0.102144	54.5728
Slyc-SL4.0ch12	Slyc-Solyc12g008420.3.1.ITAG4.0	Jreg-Chr01	Jreg-Jr01_27830_p1	JrRDR3	0.383576	1.45589	0.263466	48.5295

## Sheet: to Vvin
Supplementary table 2E
Chr A	gene A	Chr B	gene B	Name	Ka	Ks	Ka_Ks	Myr
Vvin-1	Vvin-transcript:VIT_01s0011g05870.t01	Jreg-Chr16	Jreg-Jr16_06830_p1	JrRDR1d	0.228844	0.888961	0.257428	29.632
Vvin-1	Vvin-transcript:VIT_01s0113g00500.t01	Jreg-Chr13	Jreg-Jr13_14910_p1	JrAGO7	0.0999922	0.986068	0.101405	32.8689
Vvin-4	Vvin-transcript:VIT_04s0008g05430.t01	Jreg-Chr11	Jreg-Jr11_29310_p1	JrRDR6a	0.155465	1.10894	0.140193	36.9645
Vvin-4	Vvin-transcript:VIT_04s0023g00920.t01	Jreg-Chr11	Jreg-Jr11_11410_p1	JrDCL2b	0.227634	1.0536	0.216054	35.1199
Vvin-5	Vvin-transcript:VIT_05s0020g04190.t01	Jreg-Chr07	Jreg-Jr07_24420_p1	JrAGO10a	0.043759	0.786187	0.0556598	26.2062
Vvin-5	Vvin-transcript:VIT_05s0020g04190.t01	Jreg-Chr12	Jreg-Jr12_15330_p1	JrAGO10c	0.0423566	0.764542	0.0554013	25.4847
Vvin-6	Vvin-transcript:VIT_06s0004g02810.t01	Jreg-Chr05	Jreg-Jr05_09960_p1	JrDRB2.1	0.113348	0.861014	0.131645	28.7005
Vvin-6	Vvin-transcript:VIT_06s0004g02810.t01	Jreg-Chr14	Jreg-Jr14_13750_p1	JrDRB2.2	0.112406	0.819827	0.13711	27.3276
Vvin-6	Vvin-transcript:VIT_06s0061g01040.t01	Jreg-Chr05	Jreg-Jr05_13150_p1	JrAGO5a	0.199754	1.27017	0.157266	42.3388
Vvin-6	Vvin-transcript:VIT_06s0061g01040.t01	Jreg-Chr14	Jreg-Jr14_17740_p1	JrAGO5b	0.193611	1.2241	0.158166	40.8032
Vvin-6	Vvin-transcript:VIT_06s0061g01040.t01	Jreg-Chr14	Jreg-Jr14_14640_p1	JrAGO4b	0.6559	3.1338	0.209299	104.46
Vvin-10	Vvin-transcript:VIT_10s0003g05070.t01	Jreg-Chr03	Jreg-Jr03_17090_p1	JrDRB7.1	0.21913	0.692842	0.316278	23.0947
Vvin-10	Vvin-transcript:VIT_10s0042g01150.t01	Jreg-Chr03	Jreg-Jr03_09750_p1	JrAGO2a	0.313768	1.39131	0.225519	46.3771
Vvin-11	Vvin-transcript:VIT_11s0016g03220.t01	Jreg-Chr01	Jreg-Jr01_27830_p1	JrRDR3	0.270689	1.07397	0.252044	35.7991
Vvin-11	Vvin-transcript:VIT_11s0016g04620.t01	Jreg-Chr01	Jreg-Jr01_29210_p1	JrAGO10b	0.115423	0.747324	0.154448	24.9108
Vvin-11	Vvin-transcript:VIT_11s0149g00100.t01	Jreg-Chr06	Jreg-Jr06_20150_p1	JrDCL4	0.1995	1.04432	0.191033	34.8108
Vvin-12	Vvin-transcript:VIT_12s0059g01430.t01	Jreg-Chr10	Jreg-Jr10_13510_p1	JrAGO6	0.112164	0.799146	0.140354	26.6382
Vvin-14	Vvin-transcript:VIT_14s0030g01280.t01	Jreg-Chr11	Jreg-Jr11_01480_p1	JrDRB3-5.2	0.233533	0.706962	0.330333	23.5654
Vvin-14	Vvin-transcript:VIT_14s0068g01520.t01	Jreg-Chr01	Jreg-Jr01_01240_p1	JrDRB3-5.3	0.165763	0.706586	0.234598	23.5529
Vvin-14	Vvin-transcript:VIT_14s0068g01520.t01	Jreg-Chr10	Jreg-Jr10_00540_p1	JrDRB3-5.1	0.172578	0.616763	0.279813	20.5588
Vvin-15	Vvin-transcript:VIT_15s0048g02380.t01	Jreg-Chr07	Jreg-Jr07_10040_p1	JrDCL1	0.0946411	0.662093	0.142942	22.0698
Vvin-17	Vvin-transcript:VIT_17s0000g07970.t01	Jreg-Chr02	Jreg-Jr02_03810_p1	JrRDR2	0.491604	1.08867	0.451566	36.2889
Vvin-18	Vvin-transcript:VIT_18s0001g07670.t01	Jreg-Chr08	Jreg-Jr08_07480_p1	JrDRB1.1	0.288749	0.977125	0.295508	32.5708

## Sheet: to Csin
Supplementary table 2F
Chr A	gene A	Chr B	gene B	Name	Ka	Ks	Ka_Ks	Myr
Csin-chr2	Csin-Cs_ont_2g008140.1	Jreg-Chr03	Jreg-Jr03_17090_p1	JrDRB7.1	0.21579	0.704018	0.306512	23.4673
Csin-chr2	Csin-Cs_ont_2g009220.1	Jreg-Chr03	Jreg-Jr03_09750_p1	JrAGO2a	0.27761	1.17204	0.23686	39.068
Csin-chr2	Csin-Cs_ont_2g009220.1	Jreg-Chr04	Jreg-Jr04_15030_p1	JrAGO2b	0.248582	1.12554	0.220856	37.518
Csin-chr2	Csin-Cs_ont_2g013790.1	Jreg-Chr16	Jreg-Jr16_06830_p1	JrRDR1d	0.24761	1.23491	0.200509	41.1637
Csin-chr2	Csin-Cs_ont_2g018230.1	Jreg-Chr10	Jreg-Jr10_13510_p1	JrAGO6	0.119179	0.967574	0.123173	32.2525
Csin-chr2	Csin-Cs_ont_2g024760.1	Jreg-Chr01	Jreg-Jr01_01240_p1	JrDRB3-5.3	0.235958	0.742948	0.317597	24.7649
Csin-chr2	Csin-Cs_ont_2g024760.1	Jreg-Chr10	Jreg-Jr10_00540_p1	JrDRB3-5.1	0.209424	0.671951	0.311665	22.3984
Csin-chr2	Csin-Cs_ont_2g030070.1	Jreg-Chr14	Jreg-Jr14_14640_p1	JrAGO4b	0.0852415	1.13532	0.0750813	37.8441
Csin-chr3	Csin-Cs_ont_3g012080.1	Jreg-Chr08	Jreg-Jr08_07480_p1	JrDRB1.1	0.289095	1.05245	0.274686	35.0818
Csin-chr4	Csin-Cs_ont_4g002470.2	Jreg-Chr11	Jreg-Jr11_29310_p1	JrRDR6a	0.15854	0.985701	0.16084	32.8567
Csin-chr4	Csin-Cs_ont_4g009000.1	Jreg-Chr01	Jreg-Jr01_27830_p1	JrRDR3	0.293853	1.24222	0.236555	41.4072
Csin-chr5	Csin-Cs_ont_5g005540.1	Jreg-Chr07	Jreg-Jr07_10040_p1	JrDCL1	0.0928269	0.818343	0.113433	27.2781
Csin-chr5	Csin-Cs_ont_5g029310.2	Jreg-Chr06	Jreg-Jr06_16920_p1	JrAGO1a	0.0653514	0.868776	0.0752224	28.9592
Csin-chr5	Csin-Cs_ont_5g029310.2	Jreg-Chr15	Jreg-Jr15_11560_p1	JrAGO1b	0.094465	1.0394	0.0908846	34.6465
Csin-chr5	Csin-Cs_ont_5g046160.1	Jreg-Chr02	Jreg-Jr02_03810_p1	JrRDR2	0.160591	0.917832	0.174967	30.5944
Csin-chr6	Csin-Cs_ont_6g024640.1	Jreg-Chr11	Jreg-Jr11_11410_p1	JrDCL2b	0.217409	0.931326	0.23344	31.0442
Csin-chr7	Csin-Cs_ont_7g026970.1	Jreg-Chr13	Jreg-Jr13_14910_p1	JrAGO7	0.0963777	0.910244	0.105881	30.3415
Csin-chr8	Csin-Cs_ont_8g005050.1	Jreg-Chr05	Jreg-Jr05_09960_p1	JrDRB2.1	0.179677	1.00084	0.179527	33.3612
Csin-chr8	Csin-Cs_ont_8g005050.1	Jreg-Chr14	Jreg-Jr14_13750_p1	JrDRB2.2	0.160683	0.873554	0.183942	29.1185
Csin-chr8	Csin-Cs_ont_8g006600.1	Jreg-Chr05	Jreg-Jr05_13150_p1	JrAGO5a	0.214853	1.24812	0.172141	41.6039
Csin-chr8	Csin-Cs_ont_8g006600.1	Jreg-Chr14	Jreg-Jr14_17740_p1	JrAGO5b	0.223167	1.17328	0.190208	39.1093
Csin-chr9	Csin-Cs_ont_9g003570.1	Jreg-Chr11	Jreg-Jr11_01480_p1	JrDRB3-5.2	0.377585	2.03405	0.185632	67.8016
Csin-chr9	Csin-Cs_ont_9g006470.2	Jreg-Chr07	Jreg-Jr07_24420_p1	JrAGO10a	0.0488654	0.771546	0.0633344	25.7182
Csin-chr9	Csin-Cs_ont_9g006470.2	Jreg-Chr12	Jreg-Jr12_15330_p1	JrAGO10c	0.0454491	0.787513	0.0577122	26.2504

## Sheet: to Ptri
Supplementary table 2G
Chr A	gene A	Chr B	gene B	Name	Ka	Ks	Ka_Ks	Myr
Ptri-18	Ptri-transcript:PNS92354	Jreg-Chr11	Jreg-Jr11_29310_p1	JrRDR6a	0.151274	1.0285	0.147082	34.2834
Ptri-17	Ptri-transcript:PNS95536	Jreg-Chr01	Jreg-Jr01_01240_p1	JrDRB3-5.3	0.185238	0.860378	0.215299	28.6793
Ptri-17	Ptri-transcript:PNS95536	Jreg-Chr10	Jreg-Jr10_00540_p1	JrDRB3-5.1	0.184171	0.850803	0.216467	28.3601
Ptri-15	Ptri-transcript:PNT00917	Jreg-Chr02	Jreg-Jr02_03810_p1	JrRDR2	0.16968	0.918011	0.184834	30.6004
Ptri-15	Ptri-transcript:PNT01708	Jreg-Chr03	Jreg-Jr03_09750_p1	JrAGO2a	0.241428	1.19457	0.202104	39.8191
Ptri-15	Ptri-transcript:PNT01708	Jreg-Chr04	Jreg-Jr04_15030_p1	JrAGO2b	0.250202	1.19094	0.210089	39.6979
Ptri-14	Ptri-transcript:PNT05165	Jreg-Chr10	Jreg-Jr10_13510_p1	JrAGO6	0.102479	0.891097	0.115003	29.7032
Ptri-13	Ptri-transcript:PNT06475	Jreg-Chr11	Jreg-Jr11_01480_p1	JrDRB3-5.2	0.289119	0.736879	0.392356	24.5626
Ptri-12	Ptri-transcript:PNT09283	Jreg-Chr06	Jreg-Jr06_16920_p1	JrAGO1a	0.0656638	1.02731	0.0639183	34.2436
Ptri-12	Ptri-transcript:PNT10706	Jreg-Chr03	Jreg-Jr03_09750_p1	JrAGO2a	0.268831	1.20674	0.222774	40.2247
Ptri-12	Ptri-transcript:PNT10706	Jreg-Chr04	Jreg-Jr04_15030_p1	JrAGO2b	0.240918	1.18586	0.203159	39.5285
Ptri-11	Ptri-transcript:PNT13785	Jreg-Chr03	Jreg-Jr03_17090_p1	JrDRB7.1	0.228666	0.724846	0.315469	24.1615
Ptri-10	Ptri-transcript:PNT15379	Jreg-Chr07	Jreg-Jr07_24420_p1	JrAGO10a	0.0526061	0.947324	0.0555312	31.5775
Ptri-10	Ptri-transcript:PNT15379	Jreg-Chr12	Jreg-Jr12_15330_p1	JrAGO10c	0.0476345	0.929623	0.0512406	30.9874
Ptri-10	Ptri-transcript:PNT15773	Jreg-Chr16	Jreg-Jr16_06830_p1	JrRDR1d	0.262206	0.999165	0.262426	33.3055
Ptri-10	Ptri-transcript:PNT16900	Jreg-Chr13	Jreg-Jr13_14910_p1	JrAGO7	0.0806248	0.916679	0.0879532	30.556
Ptri-10	Ptri-transcript:PNT17250	Jreg-Chr11	Jreg-Jr11_11410_p1	JrDCL2b	0.224445	0.904014	0.248276	30.1338
Ptri-8	Ptri-transcript:PNT23329	Jreg-Chr11	Jreg-Jr11_11410_p1	JrDCL2b	0.20832	0.967716	0.21527	32.2572
Ptri-8	Ptri-transcript:PNT24473	Jreg-Chr16	Jreg-Jr16_06830_p1	JrRDR1d	0.255424	0.969341	0.263503	32.3114
Ptri-8	Ptri-transcript:PNT24924	Jreg-Chr07	Jreg-Jr07_24420_p1	JrAGO10a	0.0514575	0.947314	0.0543193	31.5771
Ptri-8	Ptri-transcript:PNT24924	Jreg-Chr12	Jreg-Jr12_15330_p1	JrAGO10c	0.0478293	0.967213	0.0494507	32.2404
Ptri-6	Ptri-transcript:PNT31136	Jreg-Chr05	Jreg-Jr05_13150_p1	JrAGO5a	0.253377	4.46591	0.0567357	148.864
Ptri-6	Ptri-transcript:PNT31136	Jreg-Chr14	Jreg-Jr14_17740_p1	JrAGO5b	0.267944	NaN	NaN	#VALUE!
Ptri-6	Ptri-transcript:PNT32039	Jreg-Chr01	Jreg-Jr01_27830_p1	JrRDR3	0.294009	1.22444	0.240118	40.8145
Ptri-6	Ptri-transcript:PNT33711	Jreg-Chr11	Jreg-Jr11_29310_p1	JrRDR6a	0.153657	1.03397	0.148609	34.4656
Ptri-5	Ptri-transcript:PNT34917	Jreg-Chr11	Jreg-Jr11_01480_p1	JrDRB3-5.2	0.282005	0.764989	0.368639	25.4996
Ptri-5	Ptri-transcript:PNT36865	Jreg-Chr08	Jreg-Jr08_07480_p1	JrDRB1.1	0.265339	0.961977	0.275826	32.0659
Ptri-2	Ptri-transcript:PNT49130	Jreg-Chr08	Jreg-Jr08_07480_p1	JrDRB1.1	0.213752	1.13109	0.188978	37.7032
Ptri-2	Ptri-transcript:PNT50340	Jreg-Chr07	Jreg-Jr07_10040_p1	JrDCL1	0.0923763	0.740353	0.124773	24.6784
Ptri-1	Ptri-transcript:PNT57860	Jreg-Chr01	Jreg-Jr01_01240_p1	JrDRB3-5.3	0.214438	0.850186	0.252224	28.3395
Ptri-1	Ptri-transcript:PNT57860	Jreg-Chr10	Jreg-Jr10_00540_p1	JrDRB3-5.1	0.213123	0.816894	0.260895	27.2298
Ptri-1	Ptri-transcript:PNT60308	Jreg-Chr03	Jreg-Jr03_17090_p1	JrDRB7.1	0.220004	0.780874	0.281741	26.0291

## Sheet: to Pdul
Supplementary table 2H
Chr A	gene A	Chr B	gene B	Name	Ka	Ks	Ka_Ks	Myr
Pdul-NC_047650.1	Pdul-rna-XM_034342988.1	Jreg-Chr11	Jreg-Jr11_29310_p1	JrRDR6a	0.142865	0.891134	0.160318	29.7045
Pdul-NC_047655.1	Pdul-rna-XM_034364817.1	Jreg-Chr11	Jreg-Jr11_01480_p1	JrDRB3-5.2	0.216403	0.61249	0.353317	20.4163
Pdul-NC_047652.1	Pdul-rna-XM_034353927.1	Jreg-Chr10	Jreg-Jr10_13510_p1	JrAGO6	0.115199	0.750767	0.153442	25.0256
Pdul-NC_047650.1	Pdul-rna-XM_034342390.1	Jreg-Chr13	Jreg-Jr13_14910_p1	JrAGO7	0.0923822	0.768454	0.120218	25.6151
Pdul-NC_047650.1	Pdul-rna-XM_034357925.1	Jreg-Chr12	Jreg-Jr12_15330_p1	JrAGO10c	0.0406184	0.707647	0.0573993	23.5882
Pdul-NC_047655.1	Pdul-rna-XM_034366096.1	Jreg-Chr14	Jreg-Jr14_13750_p1	JrDRB2.2	0.116829	0.627347	0.186227	20.9116
Pdul-NC_047655.1	Pdul-rna-XM_034363596.1	Jreg-Chr14	Jreg-Jr14_14640_p1	JrAGO4b	0.0793149	0.905566	0.087586	30.1855
Pdul-NC_047655.1	Pdul-rna-XM_034363506.1	Jreg-Chr14	Jreg-Jr14_17740_p1	JrAGO5b	0.217335	1.49914	0.144973	49.9712
Pdul-NC_047655.1	Pdul-rna-XM_034363506.1	Jreg-Chr14	Jreg-Jr14_14640_p1	JrAGO4b	0.643375	2.39094	0.269089	79.6979
Pdul-NC_047650.1	Pdul-rna-XM_034344174.1	Jreg-Chr16	Jreg-Jr16_06770_p1	JrRDR1h	0.265655	0.928382	0.286149	30.9461
Pdul-NC_047654.1	Pdul-rna-XM_034358984.1	Jreg-Chr02	Jreg-Jr02_03810_p1	JrRDR2	0.159089	0.816564	0.194827	27.2188
Pdul-NC_047652.1	Pdul-rna-XM_034352102.1	Jreg-Chr01	Jreg-Jr01_01240_p1	JrDRB3-5.3	0.174513	0.699029	0.249651	23.301
Pdul-NC_047656.1	Pdul-rna-XM_034369476.1	Jreg-Chr01	Jreg-Jr01_27830_p1	JrRDR3	0.317542	1.00552	0.315798	33.5175
Pdul-NC_047653.1	Pdul-rna-XM_034355964.1	Jreg-Chr04	Jreg-Jr04_15030_p1	JrAGO2b	0.224979	1.11272	0.202187	37.0908
Pdul-NC_047653.1	Pdul-rna-XM_034355391.1	Jreg-Chr03	Jreg-Jr03_17090_p1	JrDRB7.1	0.212362	0.709083	0.299488	23.6361
Pdul-NC_047653.1	Pdul-rna-XM_034355964.1	Jreg-Chr03	Jreg-Jr03_09750_p1	JrAGO2a	0.266351	1.08486	0.245517	36.1619
Pdul-NC_047654.1	Pdul-rna-XM_034359191.1	Jreg-Chr06	Jreg-Jr06_16920_p1	JrAGO1a	0.0936321	0.784221	0.119395	26.1407
Pdul-NC_047655.1	Pdul-rna-XM_034366096.1	Jreg-Chr05	Jreg-Jr05_09960_p1	JrDRB2.1	0.134083	0.760074	0.176408	25.3358
Pdul-NC_047655.1	Pdul-rna-XM_034363506.1	Jreg-Chr05	Jreg-Jr05_10980_p1	JrAGO4a	0.641522	3.04877	0.21042	101.626
Pdul-NC_047655.1	Pdul-rna-XM_034363596.1	Jreg-Chr05	Jreg-Jr05_10980_p1	JrAGO4a	0.0852465	0.886998	0.0961068	29.5666
Pdul-NC_047655.1	Pdul-rna-XM_034363506.1	Jreg-Chr05	Jreg-Jr05_13150_p1	JrAGO5a	0.190672	1.40315	0.135889	46.7716
Pdul-NC_047650.1	Pdul-rna-XM_034345485.1	Jreg-Chr08	Jreg-Jr08_07480_p1	JrDRB1.1	0.25328	1.05703	0.239614	35.2344
Pdul-NC_047650.1	Pdul-rna-XM_034357925.1	Jreg-Chr07	Jreg-Jr07_24420_p1	JrAGO10a	0.0437161	0.665004	0.0657381	22.1668
Pdul-NC_047651.1	Pdul-rna-XM_034346771.1	Jreg-Chr07	Jreg-Jr07_10040_p1	JrDCL1	0.0912035	0.673848	0.135347	22.4616

## Sheet: to Cave
Supplementary table 2I
Chr A	gene A	Chr B	gene B	Name	Ka	Ks	Ka_Ks	Myr
Cave-pchr02	Cave-Cav02g10720.t1	Jreg-Chr11	Jreg-Jr11_11410_p1	JrDCL2b	0.166219	0.502082	0.33106	16.7361
Cave-pchr02	Cave-Cav02g07400.t1	Jreg-Chr11	Jreg-Jr11_01480_p1	JrDRB3-5.2	0.103508	0.353617	0.292714	11.7872
Cave-pchr08	Cave-Cav08g03390.t1	Jreg-Chr11	Jreg-Jr11_29310_p1	JrRDR6a	0.103543	0.348117	0.297437	11.6039
Cave-pchr05	Cave-Cav05g01930.t1	Jreg-Chr10	Jreg-Jr10_13510_p1	JrAGO6	0.105733	0.547332	0.193179	18.2444
Cave-pchr05	Cave-Cav05g25770.t1	Jreg-Chr10	Jreg-Jr10_00540_p1	JrDRB3-5.1	0.124677	0.365218	0.341378	12.1739
Cave-pchr04	Cave-Cav04g20600.t1	Jreg-Chr13	Jreg-Jr13_14910_p1	JrAGO7	0.0520536	0.311344	0.16719	10.3781
Cave-pchr04	Cave-Cav04g12610.t1	Jreg-Chr12	Jreg-Jr12_15330_p1	JrAGO10c	0.0217616	0.305444	0.0712457	10.1815
Cave-pchr06	Cave-Cav06g16700.t1	Jreg-Chr15	Jreg-Jr15_11560_p1	JrAGO1b	0.0760775	0.478289	0.159062	15.943
Cave-pchr10	Cave-Cav10g06170.t1	Jreg-Chr14	Jreg-Jr14_17740_p1	JrAGO5b	0.144001	0.661449	0.217705	22.0483
Cave-pchr10	Cave-Cav10g07780.t1	Jreg-Chr14	Jreg-Jr14_14640_p1	JrAGO4b	0.0720347	0.552597	0.130357	18.4199
Cave-pchr10	Cave-Cav10g09180.t1	Jreg-Chr14	Jreg-Jr14_13750_p1	JrDRB2.2	0.0838879	0.287951	0.291327	9.59838
Cave-pchr04	Cave-Cav04g08900.t1	Jreg-Chr16	Jreg-Jr16_06830_p1	JrRDR1d	0.153342	0.510162	0.300575	17.0054
Cave-pchr03	Cave-Cav03g04390.t1	Jreg-Chr02	Jreg-Jr02_03810_p1	JrRDR2	0.126256	0.484616	0.260529	16.1539
Cave-pchr05	Cave-Cav05g25770.t1	Jreg-Chr01	Jreg-Jr01_01240_p1	JrDRB3-5.3	0.0948953	0.368093	0.257802	12.2698
Cave-pchr11	Cave-Cav11g11440.t1	Jreg-Chr01	Jreg-Jr01_29210_p1	JrAGO10b	0.0696036	0.359179	0.193786	11.9726
Cave-pchr11	Cave-Cav11g13310.t1	Jreg-Chr01	Jreg-Jr01_27830_p1	JrRDR3	0.160329	0.357363	0.448643	11.9121
Cave-pchr06	Cave-Cav06g16700.t1	Jreg-Chr06	Jreg-Jr06_16920_p1	JrAGO1a	0.0488351	0.449443	0.108657	14.9814
Cave-pchr06	Cave-Cav06g19790.t1	Jreg-Chr06	Jreg-Jr06_20150_p1	JrDCL4	0.103063	0.370859	0.277904	12.362
Cave-pchr01	Cave-Cav01g35330.t1	Jreg-Chr05	Jreg-Jr05_05420_p1	JrDCL3	0.170974	0.506601	0.337493	16.8867
Cave-pchr10	Cave-Cav10g06170.t1	Jreg-Chr05	Jreg-Jr05_13150_p1	JrAGO5a	0.132898	0.687056	0.193431	22.9019
Cave-pchr10	Cave-Cav10g07780.t1	Jreg-Chr05	Jreg-Jr05_10980_p1	JrAGO4a	0.0790714	0.592617	0.133427	19.7539
Cave-pchr10	Cave-Cav10g09180.t1	Jreg-Chr05	Jreg-Jr05_09960_p1	JrDRB2.1	0.100355	0.42676	0.235156	14.2253
Cave-pchr04	Cave-Cav04g12610.t1	Jreg-Chr07	Jreg-Jr07_24420_p1	JrAGO10a	0.0257352	0.281028	0.0915751	9.36761
Cave-pchr07	Cave-Cav07g08430.t1	Jreg-Chr07	Jreg-Jr07_10040_p1	JrDCL1	0.0340379	0.31738	0.107247	10.5793

## Sheet: to Jman
Supplementary table 2J
Chr A	gene A	Chr B	gene B	Name	Ka	Ks	Ka_Ks	Myr
Jman-GWHBEUN00000005	Jman-rna-Jman005T0120700.1	Jreg-Chr11	Jreg-Jr11_11410_p1	JrDCL2b	0.00974316	0.0293658	0.331786	0.97886
Jman-GWHBEUN00000005	Jman-rna-Jman005T0280600.1	Jreg-Chr11	Jreg-Jr11_29310_p1	JrRDR6a	0.00793515	0.0238364	0.3329	0.794547
Jman-GWHBEUN00000005	Jman-rna-Jman005T0010700.3	Jreg-Chr11	Jreg-Jr11_01480_p1	JrDRB3-5.2	0.00979539	0.0373826	0.262031	1.24609
Jman-GWHBEUN00000013	Jman-rna-Jman013T0076700.1	Jreg-Chr11	Jreg-Jr11_11410_p1	JrDCL2b	0.150721	0.381504	0.395071	12.7168
Jman-GWHBEUN00000002	Jman-rna-Jman002T0349300.1	Jreg-Chr10	Jreg-Jr10_00540_p1	JrDRB3-5.1	0.0953403	0.309854	0.307694	10.3285
Jman-GWHBEUN00000006	Jman-rna-Jman006T0003000.1	Jreg-Chr10	Jreg-Jr10_00540_p1	JrDRB3-5.1	0.00802504	0.0316898	0.253238	1.05633
Jman-GWHBEUN00000006	Jman-rna-Jman006T0116100.1	Jreg-Chr10	Jreg-Jr10_13510_p1	JrAGO6	0.00434591	0.0334939	0.129752	1.11646
Jman-GWHBEUN00000003	Jman-rna-Jman003T0128000.1	Jreg-Chr13	Jreg-Jr13_14910_p1	JrAGO7	0.00647183	0.0318619	0.203121	1.06206
Jman-GWHBEUN00000001	Jman-rna-Jman001T0117400.1	Jreg-Chr12	Jreg-Jr12_15330_p1	JrAGO10c	0.0246207	0.262885	0.0936556	8.76284
Jman-GWHBEUN00000010	Jman-rna-Jman010T0081300.1	Jreg-Chr12	Jreg-Jr12_15330_p1	JrAGO10c	0.00262391	0.0262673	0.0998927	0.875576
Jman-GWHBEUN00000007	Jman-rna-Jman007T0183100.1	Jreg-Chr15	Jreg-Jr15_11560_p1	JrAGO1b	0.0542096	0.375642	0.144312	12.5214
Jman-GWHBEUN00000016	Jman-rna-Jman016T0114800.1	Jreg-Chr15	Jreg-Jr15_11560_p1	JrAGO1b	0.00576787	0.0366685	0.157298	1.22228
Jman-GWHBEUN00000012	Jman-rna-Jman012T0177900.1	Jreg-Chr14	Jreg-Jr14_17740_p1	JrAGO5b	0.0162242	0.0525763	0.308583	1.75254
Jman-GWHBEUN00000012	Jman-rna-Jman012T0126100.1	Jreg-Chr14	Jreg-Jr14_13750_p1	JrDRB2.2	0.0113692	0.0301296	0.377345	1.00432
Jman-GWHBEUN00000012	Jman-rna-Jman012T0138100.1	Jreg-Chr14	Jreg-Jr14_14640_p1	JrAGO4b	0.00094373	0.0446881	0.0211181	1.4896
Jman-GWHBEUN00000015	Jman-rna-Jman015T0031000.1	Jreg-Chr14	Jreg-Jr14_17740_p1	JrAGO5b	0.121162	0.578229	0.20954	19.2743
Jman-GWHBEUN00000015	Jman-rna-Jman015T0069600.1	Jreg-Chr14	Jreg-Jr14_13750_p1	JrDRB2.2	0.0842783	0.36611	0.230199	12.2037
Jman-GWHBEUN00000011	Jman-rna-Jman011T0061100.1	Jreg-Chr16	Jreg-Jr16_06770_p1	JrRDR1h	0.0826483	0.120696	0.684765	4.0232
Jman-GWHBEUN00000011	Jman-rna-Jman011T0065500.1	Jreg-Chr16	Jreg-Jr16_07070_p1	JrRDR1e	0.0320273	0.047668	0.671884	1.58893
Jman-GWHBEUN00000004	Jman-rna-Jman004T0032400.1	Jreg-Chr02	Jreg-Jr02_03810_p1	JrRDR2	0.00722356	0.0234945	0.307458	0.783149
Jman-GWHBEUN00000004	Jman-rna-Jman004T0241600.1	Jreg-Chr02	Jreg-Jr02_23630_p1	JrRDR1c	0.0302465	0.0301127	1.00444	1.00376
Jman-GWHBEUN00000002	Jman-rna-Jman002T0050200.1	Jreg-Chr01	Jreg-Jr01_29210_p1	JrAGO10b	0.00794926	0.0297185	0.267486	0.990616
Jman-GWHBEUN00000002	Jman-rna-Jman002T0066100.1	Jreg-Chr01	Jreg-Jr01_27830_p1	JrRDR3	0.123187	0.164535	0.748699	5.48451
Jman-GWHBEUN00000002	Jman-rna-Jman002T0068900.1	Jreg-Chr01	Jreg-Jr01_27530_p1	JrRDR1b	0.0266412	0.0413665	0.644029	1.37888
Jman-GWHBEUN00000002	Jman-rna-Jman002T0349300.1	Jreg-Chr01	Jreg-Jr01_01240_p1	JrDRB3-5.3	0.0127285	0.0201693	0.631086	0.672309
Jman-GWHBEUN00000006	Jman-rna-Jman006T0003000.1	Jreg-Chr01	Jreg-Jr01_01240_p1	JrDRB3-5.3	0.0950408	0.246692	0.385261	8.22306
Jman-GWHBEUN00000008	Jman-rna-Jman008T0188400.1	Jreg-Chr04	Jreg-Jr04_15030_p1	JrAGO2b	0.143966	0.491541	0.292886	16.3847
Jman-GWHBEUN00000009	Jman-rna-Jman009T0069800.1	Jreg-Chr04	Jreg-Jr04_15030_p1	JrAGO2b	0.0225174	0.0431205	0.522198	1.43735
Jman-GWHBEUN00000008	Jman-rna-Jman008T0088100.1	Jreg-Chr03	Jreg-Jr03_20100_p1	JrDRB4A	0.0215377	0.0396251	0.543538	1.32084
Jman-GWHBEUN00000008	Jman-rna-Jman008T0122900.1	Jreg-Chr03	Jreg-Jr03_17090_p1	JrDRB7.1	0.0192154	0.0481029	0.399464	1.60343
Jman-GWHBEUN00000008	Jman-rna-Jman008T0188400.1	Jreg-Chr03	Jreg-Jr03_09750_p1	JrAGO2a	0.00962694	0.0351627	0.273783	1.17209
Jman-GWHBEUN00000009	Jman-rna-Jman009T0069800.1	Jreg-Chr03	Jreg-Jr03_09750_p1	JrAGO2a	0.144279	0.468178	0.308171	15.6059
Jman-GWHBEUN00000007	Jman-rna-Jman007T0115900.4	Jreg-Chr06	Jreg-Jr06_10860_p1	JrDRB6.2	0.0187577	0.0760368	0.246692	2.53456
Jman-GWHBEUN00000007	Jman-rna-Jman007T0183100.1	Jreg-Chr06	Jreg-Jr06_16920_p1	JrAGO1a	0.0020842	0.0327277	0.0636831	1.09092
Jman-GWHBEUN00000016	Jman-rna-Jman016T0114800.1	Jreg-Chr06	Jreg-Jr06_16920_p1	JrAGO1a	0.0499717	0.368506	0.135606	12.2835
Jman-GWHBEUN00000012	Jman-rna-Jman012T0177900.1	Jreg-Chr05	Jreg-Jr05_13150_p1	JrAGO5a	0.126078	0.536047	0.2352	17.8682
Jman-GWHBEUN00000012	Jman-rna-Jman012T0126100.1	Jreg-Chr05	Jreg-Jr05_09960_p1	JrDRB2.1	0.0843869	0.359042	0.235034	11.9681
Jman-GWHBEUN00000012	Jman-rna-Jman012T0138100.1	Jreg-Chr05	Jreg-Jr05_10980_p1	JrAGO4a	0.0347664	0.431008	0.0806631	14.3669
Jman-GWHBEUN00000015	Jman-rna-Jman015T0053700.1	Jreg-Chr05	Jreg-Jr05_10980_p1	JrAGO4a	0.0061196	0.0361895	0.169099	1.20632
Jman-GWHBEUN00000015	Jman-rna-Jman015T0069600.1	Jreg-Chr05	Jreg-Jr05_09960_p1	JrDRB2.1	0.00670645	0.0342917	0.195571	1.14306
Jman-GWHBEUN00000015	Jman-rna-Jman015T0116700.1	Jreg-Chr05	Jreg-Jr05_05420_p1	JrDCL3	0.00436087	0.0165549	0.263418	0.551831
Jman-GWHBEUN00000015	Jman-rna-Jman015T0031000.1	Jreg-Chr05	Jreg-Jr05_13150_p1	JrAGO5a	0.0178378	0.0323248	0.55183	1.07749
Jman-GWHBEUN00000013	Jman-rna-Jman013T0151200.1	Jreg-Chr08	Jreg-Jr08_07480_p1	JrDRB1.1	0.0101434	0.0219431	0.462258	0.731435
Jman-GWHBEUN00000001	Jman-rna-Jman001T0117400.1	Jreg-Chr07	Jreg-Jr07_24420_p1	JrAGO10a	0.000909539	0.0382297	0.0237914	1.27432
Jman-GWHBEUN00000001	Jman-rna-Jman001T0281100.1	Jreg-Chr07	Jreg-Jr07_10040_p1	JrDCL1	0.00467723	0.0353949	0.132144	1.17983
Jman-GWHBEUN00000010	Jman-rna-Jman010T0081300.1	Jreg-Chr07	Jreg-Jr07_24420_p1	JrAGO10a	0.0245711	0.261861	0.0938327	8.7287

[truncated: 2 more sheets: to Jsig, to Jm_r]
