# Supplementary material for: RNA Interference Pathways in <em>Juglandaceae</em>: Based on Gene Diversity, Evolution, and Functional Differentiation
Source: Preprints.org preprint supplement (doi:10.20944/preprints202210.0323.v1), 2022-10-21
Supplement: Supplementary file 3 [file Supplementary table 3.xlsx]

## Sheet: RDR
Supplementary table 3A
Species Name	Gene Name	Gene ID	Chr.	Location		Number of amino acids	Isoelectric point (PI)	Molecular weight (Da)
Carya cathayensis	CcRDR1C	Caca0601S0126	scaffold18489	2570794	2574575	1742	6.13	200965
Carya cathayensis	CcRDR6	Caca0851S0151	scaffold29483	1479088	1485695	999	7.97	114449
Carya cathayensis	CcRDR1B	Caca1073S0011	scaffold42007	209626	213513	1199	6.63	137008
Carya cathayensis	CcRDR1A	Caca1073S0012	scaffold42007	231447	235170	1012	7.3	115670
Carya illinoinensis	CiRDR1A	Cail1259S0061	scaffold100125	1092681	1096596	1018	8.48	116419
Carya illinoinensis	CiRDR1B	Cail1259S0064	scaffold100125	1115487	1117676	1014	6.69	116006
Carya illinoinensis	CiRDR3	Cail1276S0034	scaffold101903	581039	597819	460	8.95	53180.6
Carya illinoinensis	CiRDR2	Cail1310S0031	scaffold104348	428501	436127	991	6.43	112306
Carya illinoinensis	CiRDR6A	Cail1387S0021	scaffold112236	210016	211105	1111	6.37	126342
Carya illinoinensis	CiRDR1C	Cail1422S0001	scaffold116015	28218	28859	265	8.13	31115
Carya illinoinensis	CiRDR1D	Cail1422S0002	scaffold116015	28887	29186	213	8.84	24397.2
Carya illinoinensis	CiRDR1E	Cail1422S0006	scaffold116015	140685	150095	1132	7	129022
Carya illinoinensis	CiRDR1F	Cail1422S0009	scaffold116015	159923	161697	710	6.67	80266.7
Carya illinoinensis	CiRDR1G	Cail1422S0010	scaffold116015	176082	178643	341	6.2	39473.6
Carya illinoinensis	CiRDR1H	Cail1422S0015	scaffold116015	285571	298094	746	9.12	85492.2
Carya illinoinensis	CiRDR1I	Cail1422S0018	scaffold116015	378459	380334	645	8.87	73171.1
Carya illinoinensis	CiRDR1J	Cail1484S0004	scaffold121792	96898	102045	428	6.49	49347.1
Carya illinoinensis	CiRDR1K	Cail1484S0006	scaffold121792	120998	124849	1009	6.25	116496
Carya illinoinensis	CiRDR6B	Cail1502S0013	scaffold123347	78951	85404	1015	6.73	116534
Juglans mandshurica	JmaRDR3	Jman002G0066200	GWHBEUN00000002	7249812	7265706	1199	6.56	137028
Juglans mandshurica	JmaRDR6	Jman005G0292200	GWHBEUN00000005	37447424	37450321	895	8.05	101321
Juglans cathayensis	JcRDR1C	Juca_04864.t1	scaffold3877	130234	134254	233	9	26322.2
Juglans cathayensis	JcRDR1G	Juca_10838.t1	scaffold5621	49839	54481	656	9.04	75501.4
Juglans cathayensis	JcRDR1D	Juca_11919.t1	scaffold5930	53045	56562	1015	6.05	116317
Juglans cathayensis	JcRDR2	Juca_15636.t1	scaffold510	3245	10669	1004	8.39	114904
Juglans cathayensis	JcRDR1A	Juca_15919.t1	scaffold6913	9378	17978	980	7.89	110592
Juglans cathayensis	JcRDR1B	Juca_16342.t1	scaffold7107	364567	368196	1098	6.7	124947
Juglans cathayensis	JcRDR6A	Juca_16351.t1	scaffold7111	5525	9636	1015	6.4	116068
Juglans cathayensis	JcRDR1H	Juca_18021.t1	scaffold7958	45638	51036	1145	6.51	130804
Juglans cathayensis	JcRDR1F	Juca_18023.t1	scaffold7958	88953	92874	1126	7.72	129234
Juglans cathayensis	JcRDR1J	Juca_18024.t1	scaffold7958	141099	145320	1016	6.24	116067
Juglans cathayensis	JcRDR1I	Juca_21876.t1	C791395	17086	21502	1017	5.99	117086
Juglans cathayensis	JcRDR1K	Juca_24468.t1	C802477	15994	19623	1015	6.71	116489
Juglans cathayensis	JcRDR1E	Juca_28586.t1	scaffold1215	23118	28997	1015	6.4	116062
Juglans cathayensis	JcRDR3	Juca_30439.t1	scaffold1746	101764	122432	1073	7.52	122906
Juglans cathayensis	JcRDR6B	Juca_30768.t1	scaffold1832	406138	409961	996	8.37	112575
Juglans cathayensis	JcRDR6C	Juca_30769.t1	scaffold1832	409987	410397	598	8.83	68661.7
Juglans hindsii	JhRDR2A	Juhi_00526.t1	scaffold313	156022	161496	136	7.65	14941
Juglans hindsii	JhRDR6B	Juhi_11734.t1	scaffold2626	374190	377203	771	8.07	87457.2
Juglans hindsii	JhRDR1.8	Juhi_13349.t1	scaffold2802	3860	8300	714	6.68	80441.3
Juglans hindsii	JhRDR1.9	Juhi_13350.t1	scaffold2802	37423	41812	1018	6.49	117105
Juglans hindsii	JhRDR1.1	Juhi_13351.t1	scaffold2802	69005	83092	934	6.33	107064
Juglans hindsii	JhRDR6A	Juhi_13364.t1	scaffold2809	54662	58892	1098	7.89	125308
Juglans hindsii	JhRDR2B	Juhi_13906.t1	scaffold3007	8051	8968	1074	7.68	122905
Juglans hindsii	JhRDR1.10	Juhi_19434.t1	scaffold5725	52001	56398	272	6.27	31358.6
Juglans hindsii	JhRDR1.6	Juhi_19436.t1	scaffold5725	101665	103496	1015	7.08	116576
Juglans hindsii	JhRDR1.11	Juhi_19437.t1	scaffold5725	103824	105783	397	5.44	45724.4
Juglans hindsii	JhRDR1.7	Juhi_19438.t1	scaffold5725	140491	145463	358	5.28	41132.2
Juglans hindsii	JhRDR1.12	Juhi_19509.t1	scaffold5742	122358	132101	958	6.11	109744
Juglans hindsii	JhRDR1.13	Juhi_19511.t1	scaffold5742	185223	196094	559	8.38	64165.8
Juglans hindsii	JhRDR1.14	Juhi_19513.t1	scaffold5742	229055	233350	836	6.3	96011.9
Juglans hindsii	JhRDR1.5	Juhi_19514.t1	scaffold5742	290012	298361	1015	5.96	116878
Juglans hindsii	JhRDR1.15	Juhi_19515.t1	scaffold5742	333664	339344	836	8.82	95495.4
Juglans hindsii	JhRDR3A	Juhi_23538.t1	scaffold609	49347	57805	938	7.03	107950
Juglans hindsii	JhRDR3B	Juhi_23539.t1	scaffold609	58343	69657	512	5.12	56782.1
Juglans hindsii	JhRDR1.3	Juhi_24024.t1	scaffold738	321282	325167	559	8.61	63425.4
Juglans hindsii	JhRDR1.16	Juhi_27395.t1	scaffold1034	28131	32054	929	7.93	106753
Juglans hindsii	JhRDR1.2	Juhi_28269.t1	scaffold1162	99526	103147	934	6.05	106238
Juglans hindsii	JhRDR1.17	Juhi_28340.t1	scaffold1172	28337	32602	1005	6.29	115200
Juglans hindsii	JhRDR1.18	Juhi_28522.t1	scaffold1208	198683	203846	1066	6.8	121913
Juglans hindsii	JhRDR1.19	Juhi_28523.t1	scaffold1208	230195	245006	1076	6.53	123322
Juglans hindsii	JhRDR1.4	Juhi_28524.t1	scaffold1208	263308	269264	1220	7.36	139020
Juglans hindsii	JhRDR1.20	Juhi_28525.t1	scaffold1208	269286	270925	1214	8.55	138659
Juglans microcarpa	JmRDR1.1	Jumi_05421.t1	scaffold6730	46879	48709	1214	8.55	138659
Juglans microcarpa	JmRDR1.2	Jumi_05422.t1	scaffold6730	49037	51315	441	5.64	50680.6
Juglans microcarpa	JmRDR1.3	Jumi_05423.t1	scaffold6730	88182	92102	439	6.1	50324.7
Juglans microcarpa	JmRDR1.4	Jumi_05424.t1	scaffold6730	92115	92831	418	5.81	48597.7
Juglans microcarpa	JmRDR1.5	Jumi_05425.t1	scaffold6730	121943	132215	735	6.35	83965.7
Juglans microcarpa	JmRDR1.6	Jumi_07302.t1	scaffold7220	38055	40138	238	6.05	27671.5
Juglans microcarpa	JmRDR1.7	Jumi_07303.t1	scaffold7220	40275	41866	387	6.8	44218.4
Juglans microcarpa	JmRDR3	Jumi_08276.t1	scaffold7562	15351	36679	520	5.93	60015
Juglans microcarpa	JmRDR1.8	Jumi_08501.t1	scaffold7645	158419	161921	904	7.52	102829
Juglans microcarpa	JmRDR6.3	Jumi_12072.t1	scaffold8972	81884	86421	1004	6.39	115048
Juglans microcarpa	JmRDR1.9	Jumi_17094.t1	scaffold10039	46229	49848	1213	7.83	138588
Juglans microcarpa	JmRDR1.10	Jumi_18038.t1	scaffold10162	130953	135444	1005	6.55	115026
Juglans microcarpa	JmRDR6.2	Jumi_21750.t1	C807271	20541	25064	1240	5.92	142326
Juglans microcarpa	JmRDR2.1	Jumi_25840.t1	C815583	97948	105266	1240	5.92	142326
Juglans microcarpa	JmRDR1.11	Jumi_27051.t1	C817239	64127	64941	1155	7.27	131697
Juglans microcarpa	JmRDR1.12	Jumi_27052.t1	C817239	71732	73957	1053	6.95	119663
Juglans microcarpa	JmRDR1.13	Jumi_27054.t1	C817239	119787	127593	249	8.8	28125.8
Juglans microcarpa	JmRDR1.14	Jumi_27055.t1	C817239	129853	130260	342	5.6	39565.8
Juglans microcarpa	JmRDR1.15	Jumi_27056.t1	C817239	166137	170010	553	9.1	62765.8
Juglans microcarpa	JmRDR1.16	Jumi_27057.t1	C817239	225203	229571	135	5.17	15557.7
Juglans microcarpa	JmRDR1.17	Jumi_27058.t2	C817239	261191	267471	798	5.79	91137.3
Juglans microcarpa	JmRDR2.2	Jumi_28935.t1	scaffold3055	75714	83007	376	8.44	42934
Juglans microcarpa	JmRDR6.3	Jumi_31999.t1	scaffold1893	191905	195883	791	7.02	92616.7
Juglans microcarpa	JmRDR1.18	Jumi_34809.t1	scaffold3635	75940	76754	1075	6.49	122365
Juglans microcarpa	JmRDR1.19	Jumi_34810.t1	scaffold3635	85063	85779	249	8.94	28190.9
Juglans microcarpa	JmRDR1.20	Jumi_34812.t1	scaffold3635	132234	142715	238	7.71	28019
Juglans microcarpa	JmRDR1.21	Jumi_34814.t1	scaffold3635	175976	180206	555	5.9	63554.6
Juglans microcarpa	JmRDR1.22	Jumi_34815.t1	scaffold3635	240596	245483	1015	6.07	116716
Juglans microcarpa	JmRDR1.23	Jumi_34816.t1	scaffold3635	285886	290220	492	8.56	56581.3
Juglans microcarpa	JmRDR1.24	Jumi_34817.t1	scaffold3635	341480	345461	851	8.44	98291.4
Juglans microcarpa	JmRDR1.25	Jumi_34818.t1	scaffold3635	386134	389296	566	6.15	66001.9
Juglans microcarpa	JmRDR1.26	Jumi_34819.t1	scaffold3635	390025	390741	700	7.1	80313.9
Juglans microcarpa	JmRDR1.27	Jumi_34820.t1	scaffold3635	416169	429280	238	6.36	27670.6
Juglans microcarpa	JmRDR1.28	Jumi_38417.t1	scaffold4675	56507	61675	1037	8.16	118418
Juglans microcarpa	JmRDR1.29	Jumi_38418.t1	scaffold4675	97801	101852	1076	6.4	123346
Juglans microcarpa	JmRDR1.30	Jumi_38419.t1	scaffold4675	124072	129538	1015	6	116527
Juglans microcarpa	JmRDR1.31	Jumi_38806.t1	scaffold4770	17490	21107	1136	6.98	131492
Juglans nigra	JnRDR1.1	Juni_01905.t1	scaffold1007	64919	70083	1005	6.76	114969
Juglans nigra	JnRDR3	Juni_05542.t1	scaffold2296	12077	36371	1076	6.4	123346
Juglans nigra	JnRDR1.2	Juni_06897.t1	scaffold655	485281	498440	904	7.11	102615
Juglans nigra	JnRDR6.1	Juni_08085.t1	scaffold3771	345721	350256	1742	6.13	200965
Juglans nigra	JnRDR2	Juni_10222.t1	scaffold3845	327810	335128	1159	7.28	132203
Juglans nigra	JnRDR1.3	Juni_11943.t1	scaffold655	28264	32861	1075	6.72	122439
Juglans nigra	JnRDR1.4	Juni_12487.t1	scaffold655	137410	141086	388	7.64	44840.4
Juglans nigra	JnRDR1.5	Juni_13122.t1	C543239	129712	131542	1098	7.32	125252
Juglans nigra	JnRDR1.6	Juni_13181.t1	scaffold4729	398466	402081	439	5.77	50415.7
Juglans nigra	JnRDR1.7	Juni_13282.t1	scaffold5280	21903	26170	1005	6.47	115085
Juglans nigra	JnRDR1.8	Juni_14510.t1	scaffold1007	23977	30422	1066	6.72	122072
Juglans nigra	JnRDR1.9	Juni_16275.t1	scaffold8791	28770	36345	1068	6.26	122294
Juglans nigra	JnRDR1.10	Juni_16751.t1	C543239	127464	129384	639	5.64	73334.3
Juglans nigra	JnRDR1.11	Juni_17712.t1	scaffold655	33274	33972	345	5.41	39598.4
Juglans nigra	JnRDR1.12	Juni_17717.t1	scaffold655	99142	103975	201	5.41	22753.7
Juglans nigra	JnRDR1.13	Juni_17718.t1	scaffold655	141898	148023	1044	6.12	120228
Juglans nigra	JnRDR1.14	Juni_17725.t1	scaffold655	391712	392994	347	5.45	39724.5
Juglans nigra	JnRDR1.15	Juni_17726.t1	scaffold655	395287	398804	322	5.14	37395.1
Juglans nigra	JnRDR1.16	Juni_18659.t1	C543239	85586	86682	1010	8.63	115918
Juglans nigra	JnRDR1.17	Juni_18660.t1	C543239	86695	90573	338	6.53	39465.9
Juglans nigra	JnRDR1.18	Juni_21346.t1	scaffold655	530155	533385	746	6.56	85174.4
Juglans nigra	JnRDR6.2	Juni_21669.t1	scaffold3364	96405	99927	872	7.07	99540
Juglans nigra	JnRDR1.19	Juni_22219.t1	scaffold1303	285581	289047	846	6.18	96067.9
Juglans nigra	JnRDR1.20	Juni_23121.t1	scaffold135	11834	15994	989	8.06	113949
Juglans nigra	JnRDR1.21	Juni_26897.t1	scaffold655	208562	208999	763	6.17	88027.9
Juglans nigra	JnRDR1.22	Juni_29007.t1	scaffold655	32892	33263	145	8.65	16500.4
Juglans nigra	JnRDR1.23	Juni_29010.t1	scaffold655	200094	200810	123	9.2	13687.2
Juglans nigra	JnRDR1.24	Juni_29011.t1	scaffold655	209012	209377	238	7.74	28112.1
Juglans sigillata	JsRDR1.1	OF11908	Chr10	12209447	12213676	1029	7.72	118226
Juglans sigillata	JsRDR1.2	OF11935	Chr10	10484400	10485641	1015	5.82	116679
Juglans sigillata	JsRDR1.3	OF11936	Chr10	10469621	10471088	413	9.36	47337
Juglans sigillata	JsRDR1.4	OF11953	Chr10	9909831	9924294	236	7.08	27379
Juglans sigillata	JsRDR1.5	OF11954	Chr10	9861140	9865647	1131	7.04	129012
Juglans sigillata	JsRDR1.6	OF11956	Chr10	9811342	9815802	1015	6	116218
Juglans sigillata	JsRDR1.7	OF11957	Chr10	9752709	9756141	1017	7.5	116323
Juglans sigillata	JsRDR1.8	OF11959	Chr10	9616714	9620237	935	7.06	107330
Juglans sigillata	JsRDR1.9	OF11960	Chr10	9530408	9534713	987	8.29	112688
Juglans sigillata	JsRDR1.10	OF11961	Chr10	9476273	9480343	992	5.83	113892
Juglans sigillata	JsRDR1.11	OF11962	Chr10	9433351	9438500	1019	6.05	116530
Juglans sigillata	JsRDR6A	OF17891	Chr05	37029257	37033354	1062	6.59	121840
Juglans sigillata	JsRDR6C	OF17994	Chr05	38023706	38028055	1185	6.83	135549
Juglans sigillata	JsRDR6B	OF26804	Chr09	5600822	5604463	890	5.87	100750
Juglans sigillata	JsRDR2	OF29375	Chr06	6610737	6617981	1047	6.37	119071
Juglans sigillata	JsRDR1.12	OF29815	Chr02	7243659	7247234	1099	6.24	125100
Juglans sigillata	JsRDR3	OF29839	Chr02	7676475	7700277	1012	6.65	115645
Pterocarya stenoptera	PsRDR3A	Ptst_04453.t1	scaffold3319	189718	195768	978	7.3	110537
Pterocarya stenoptera	PsRDR6B	Ptst_09018.t1	scaffold4503	50541	53762	881	6.29	99796
Pterocarya stenoptera	PsRDR6D	Ptst_09019.t1	scaffold4503	61502	63559	370	5.33	41066.7
Pterocarya stenoptera	PsRDR1.5	Ptst_09860.t1	scaffold4760	110112	118921	529	8.81	60643.6
Pterocarya stenoptera	PsRDR1.6	Ptst_09861.t1	scaffold4760	142010	148366	468	8.69	53097.3
Pterocarya stenoptera	PsRDR1.7	Ptst_09862.t1	scaffold4762	1272	3220	992	8.72	114221
Pterocarya stenoptera	PsRDR1.22	Ptst_09864.t1	scaffold4763	33823	34843	592	8.27	67290.4
Pterocarya stenoptera	PsRDR1.23	Ptst_09865.t1	scaffold4765	17715	22244	1015	5.91	116086
Pterocarya stenoptera	PsRDR1.24	Ptst_09866.t1	scaffold4765	24631	26014	455	5.99	51605
Pterocarya stenoptera	PsRDR1.13	Ptst_09867.t1	scaffold4765	31853	39008	534	5.82	61797.8
Pterocarya stenoptera	PsRDR1.28	Ptst_09869.t1	scaffold4765	45958	57380	1022	5.87	117181
Pterocarya stenoptera	PsRDR1.1	Ptst_10083.t1	scaffold4833	407900	408534	1244	8.33	141544
Pterocarya stenoptera	PsRDR1.2	Ptst_10084.t1	scaffold4833	422988	433042	1013	6.67	115706
Pterocarya stenoptera	PsRDR1.25	Ptst_12564.t1	scaffold5538	55318	56180	1001	6.29	114165
Pterocarya stenoptera	PsRDR1.29	Ptst_12566.t1	scaffold5538	64811	66955	913	5.77	104935
Pterocarya stenoptera	PsRDR1.30	Ptst_12567.t1	scaffold5538	68667	75836	1133	8.39	129116
Pterocarya stenoptera	PsRDR1.8	Ptst_15385.t1	scaffold6327	460	4305	1019	6.5	114904
Pterocarya stenoptera	PsRDR1.9	Ptst_15386.t1	scaffold6327	7714	10296	904	8.09	104228
Pterocarya stenoptera	PsRDR1.26	Ptst_15387.t1	scaffold6327	13103	17870	985	8.2	113736
Pterocarya stenoptera	PsRDR1.27	Ptst_15391.t1	scaffold6327	63715	71539	1000	6.03	114493
Pterocarya stenoptera	PsRDR1.12	Ptst_18625.t1	C932153	58521	82852	1016	6.07	116205
Pterocarya stenoptera	PsRDR1.14	Ptst_18627.t1	C932153	147598	148378	1003	8.45	115801
Pterocarya stenoptera	PsRDR1.15	Ptst_18628.t1	C932153	168219	169902	1033	7.34	119403
Pterocarya stenoptera	PsRDR1.16	Ptst_18629.t1	C932175	1881	2819	1003	5.9	115264
Pterocarya stenoptera	PsRDR3B	Ptst_18964.t1	C932541	171252	176460	1010	6.27	116737
Pterocarya stenoptera	PsRDR6A	Ptst_24169.t1	scaffold8656	95794	98644	371	5.28	42293.6
Pterocarya stenoptera	PsRDR1.3	Ptst_24480.t1	scaffold8768	31547	45841	1199	6.33	137083
Pterocarya stenoptera	PsRDR1.4	Ptst_24481.t1	scaffold8768	54999	57671	1013	6.29	115620
Pterocarya stenoptera	PsRDR6C	Ptst_29336.t1	C901027	4978	6363	417	5.81	48438.2
Pterocarya stenoptera	PsRDR1.17	Ptst_40256.t1	scaffold1337	43856	49532	1145	6.19	130564
Pterocarya stenoptera	PsRDR1.18	Ptst_40257.t1	scaffold1337	61823	64023	962	6.24	110704
Pterocarya stenoptera	PsRDR1.19	Ptst_40258.t1	scaffold1337	68254	72359	816	6.74	93197.2
Pterocarya stenoptera	PsRDR1.20	Ptst_40259.t1	scaffold1341	12041	13743	299	5.96	34688.4
Pterocarya stenoptera	PsRDR1.21	Ptst_40260.t1	scaffold1341	21432	27173	699	6.52	80309.7
Pterocarya stenoptera	PsRDR1.10	Ptst_43052.t1	scaffold2169	359666	362115	618	6.69	70637.1
Pterocarya stenoptera	PsRDR1.11	Ptst_43974.t1	scaffold2453	235500	239275	846	8.12	96395.7

## Sheet: DCL
Supplementary table 3B
Species Name	Gene Name	Gene ID	Chr.	Location		Number of amino acids	Isoelectric point (PI)	Molecular weight (Da)
Carya cathayensis	CcDCL2A	Caca0529S0087	scaffold15772	1903805	1918457	1407	7.97	159518
Carya cathayensis	CcDCL3	Caca0578S0052	scaffold17510	1289718	1303152	1661	6.82	185931
Carya cathayensis	CcDCL2B	Caca0711S0028	scaffold23831	724358	733520	924	6.53	104808
Carya cathayensis	CcDCL4	Caca1757S0014	scaffold69265	120500	141657	1740	6.19	195411
Carya illinoinensis	CiDCL3	Cail1087S0007	scaffold82571	193331	208081	1661	6.58	185850
Carya illinoinensis	CiDCL2A	Cail1089S0039	scaffold82682	855144	868909	1467	8.11	166338
Carya illinoinensis	CiDCL2B	Cail1155S0085	scaffold89792	1224342	1238443	1403	7.03	159093
Carya illinoinensis	CiDCL1	Cail1286S0001	scaffold102682	18140	35498	2014	5.93	225899
Carya illinoinensis	CiDCL4	Cail1429S0011	scaffold116681	136197	160976	1686	6.15	189349
Juglans mandshurica	JmaDCL1	Jman001G0281100	GWHBEUN00000001 00000001	36846295	36869683	1995	5.9	223789
Juglans cathayensis	JcDCL1	Juca_02695.t1	scaffold3295	292845	315170	2366	5.6	262329
Juglans cathayensis	JcDCL3	Juca_13601.t1	scaffold6404	59258	75552	1681	6.44	187301
Juglans cathayensis	JcDCL2	Juca_25527.t1	C804919	94025	107617	1336	8.17	151819
Juglans hindsii	JhDCL1	Juhi_00304.t1	scaffold301	39905	50220	1298	6.02	145047
Juglans hindsii	JhDCL3	Juhi_04799.t1	scaffold1632	98220	110469	1600	6.93	178854
Juglans hindsii	JhDCL2	Juhi_12420.t1	scaffold399	484069	494051	1002	6.72	113999
Juglans hindsii	JhDCL4	Juhi_13079.t1	scaffold458	269916	301238	1440	6.66	160390
Juglans microcarpa	JmDCL2A	Jumi_03565.t2	scaffold6240	242648	266283	1849	6.99	209085
Juglans microcarpa	JmDCL2B	Jumi_14675.t2	scaffold9795	157448	171423	1327	7.9	150853
Juglans microcarpa	JmDCL3	Jumi_15960.t2	scaffold2964	220527	234852	1661	7.83	186065
Juglans microcarpa	JmDCL1	Jumi_23912.t1	C812589	938	24587	1995	5.88	223520
Juglans microcarpa	JmDCL4	Jumi_30572.t1	scaffold1500	110225	121725	984	5.4	109745
Juglans microcarpa	JmDCL2C	Jumi_41581.t1	scaffold5506	38565	48547	1002	6.72	113915
Juglans nigra	JnDCL4	Juni_00597.t1	scaffold3362	33781	45803	1028	5.15	114325
Juglans nigra	JnDCL3	Juni_05347.t1	scaffold5775	281088	295782	1764	8.23	197499
Juglans nigra	JnDCL1	Juni_08783.t1	scaffold7063	396361	420219	1878	5.69	210332
Juglans nigra	JnDCL2A	Juni_08950.t1	scaffold3812	69914	84635	1404	7.97	159417
Juglans nigra	JnDCL2B	Juni_10882.t1	scaffold3812	69914	84635	1418	7.81	160769
Juglans nigra	JnDCL2C	Juni_12652.t1	scaffold1411	13117	24494	1159	7.91	130791
Juglans nigra	JnDCL2D	Juni_14607.t1	scaffold3812	69914	84635	1394	7.97	158325
Juglans sigillata	JsDCL2A	OF04221	Scaffold371	249817	404151	1404	6.39	159362
Juglans sigillata	JsDCL3	OF07365	Chr01	26803981	26821416	1661	6.89	186044
Juglans sigillata	JsDCL1	OF19759	Chr03	10950028	10976272	1974	5.89	221433
Juglans sigillata	JsDCL4	OF21239	Scaffold258	2360951	2425220	1657	6.22	186671
Juglans sigillata	JsDCL2B	OF21463	Chr05	19283684	19297567	1403	7.71	159232
Juglans sigillata	JsDCL2C	OF25593	Chr07	8301546	8316810	1014	8.38	115295
Pterocarya stenoptera	PsDCL3	Ptst_03175.t2	scaffold3045	138131	142315	2160	8.4	241467
Pterocarya stenoptera	PsDCL2A	Ptst_05905.t2	scaffold3719	64955	68005	1465	7.6	165810
Pterocarya stenoptera	PsDCL4	Ptst_08077.t1	scaffold4277	37238	39011	890	5.82	100272
Pterocarya stenoptera	PsDCL2B	Ptst_38318.t1	scaffold776	233582	234224	1157	6.43	130366

## Sheet: AGO
Supplementary table 3C
Species Name	Gene Name	Gene ID	Chr.	Location		Number of amino acids	Isoelectric point (PI)	Molecular weight (Da)
Carya cathayensis	CcAGO10A	Caca0500S0061	scaffold14356	902894	910802	715	9.25	81018.6
Carya cathayensis	CcAGO7	Caca0514S0284	scaffold15011	3470907	3475145	1012	9.36	115274
Carya cathayensis	CcAGO2	Caca0566S0121	scaffold17075	1647562	1652682	1005	9.42	112289
Carya cathayensis	CcAGO4B	Caca0613S0075	scaffold18924	1598897	1606382	922	8.88	103035
Carya cathayensis	CcAGO5B	Caca0665S0057	scaffold20882	845487	898204	995	9.51	110824
Carya cathayensis	CcAGO6	Caca0686S0006	scaffold22516	124797	131211	857	9.46	95513.9
Carya cathayensis	CcAGO5A	Caca0922S0053	scaffold33956	1073384	1081822	1022	9.53	114190
Carya cathayensis	CcAGO10B	Caca1223S0046	scaffold49819	509950	522546	940	9.23	106797
Carya cathayensis	CcAGO10C	Caca1273S0049	scaffold52217	515303	523174	997	9.19	111933
Carya cathayensis	CcAGO4A	Caca1743S0008	scaffold69122	203671	211276	937	8.9	104801
Carya illinoinensis	CiAGO7	Cail0100S0012	scaffold8670	196002	200059	1011	9.39	115177
Carya illinoinensis	CiAGO2B	Cail0150S0004	scaffold13893	40460	45576	1005	9.4	112138
Carya illinoinensis	CiAGO5B	Cail0277S0006	scaffold25226	50898	100012	917	9.58	101895
Carya illinoinensis	CiAGO1B	Cail0948S0021	scaffold72348	460746	501577	1073	9.39	117984
Carya illinoinensis	CiAGO1A	Cail1055S0107	scaffold80349	1089854	1097259	1078	9.53	119030
Carya illinoinensis	CiAGO2A	Cail1099S0047	scaffold83793	650778	660577	1234	9.29	136789
Carya illinoinensis	CiAGO4B	Cail1106S0003	scaffold84570	154630	163976	922	8.89	102997
Carya illinoinensis	CiAGO5A	Cail1107S0001	scaffold84681	371	8251	993	9.29	111303
Carya illinoinensis	CiAGO6	Cail1122S0069	scaffold86126	663438	672337	905	9.33	100829
Carya illinoinensis	CiAGO10A	Cail1153S0046	scaffold89570	468230	476906	913	9.03	102474
Carya illinoinensis	CiAGO10B	Cail1324S0066	scaffold105681	1000964	1009430	940	9.08	106842
Carya illinoinensis	CiAGO4A	Cail1381S0002	scaffold111681	105641	113478	925	8.98	103337
Juglans mandshurica	JmaAGO2	Jman015G0031000	GWHBEUN00000015	4038988	4046402	984	9.54	109827
Juglans mandshurica	JmaAGO5	Jman008G0188400	GWHBEUN00000008	26822384	26830126	1251	9.21	138498
Juglans cathayensis	JcAGO4B	Juca_00905.t1	scaffold245	282956	290117	846	8.86	94817.2
Juglans cathayensis	JcAGO5	Juca_02022.t1	scaffold3104	167655	174728	984	9.54	109827
Juglans cathayensis	JcAGO2A	Juca_04303.t1	scaffold3721	52097	55497	881	9.19	99924.1
Juglans cathayensis	JcAGO7	Juca_12980.t1	scaffold6261	406223	409896	1011	9.37	115278
Juglans cathayensis	JcAGO1	Juca_14449.t1	scaffold6776	31693	39610	1073	9.49	118849
Juglans cathayensis	JcAGO2B	Juca_19456.t1	scaffold8497	24795	29295	1004	9.45	111987
Juglans cathayensis	JcAGO10C	Juca_23518.t1	C799249	36763	44592	996	9.21	111757
Juglans cathayensis	JcAGO4A	Juca_28066.t1	scaffold1090	143506	150708	943	8.86	105531
Juglans cathayensis	JcAGO10A	Juca_30398.t1	scaffold1738	47131	57120	1038	9.08	116085
Juglans cathayensis	JcAGO6	Juca_30490.t1	scaffold1767	259603	265846	906	9.33	101052
Juglans cathayensis	JcAGO10B	Juca_33414.t1	scaffold2614	142027	156095	955	9.18	108145
Juglans hindsii	JhAGO10C	Juhi_02212.t1	scaffold73	3269934	3277625	996	9.21	111795
Juglans hindsii	JhAGO5B	Juhi_05003.t1	scaffold1660	151164	158235	989	9.52	109956
Juglans hindsii	JhAGO4B	Juhi_05043.t1	scaffold1671	160226	167438	846	8.86	94803.1
Juglans hindsii	JhAGO10B	Juhi_06215.t1	scaffold1770	566147	575066	940	9.23	106846
Juglans hindsii	JhAGO10A	Juhi_07913.t1	scaffold2027	219920	231644	1034	9.4	116444
Juglans hindsii	JhAGO2B	Juhi_09962.t1	scaffold2338	507062	511381	1005	9.39	112250
Juglans hindsii	JhAGO4A	Juhi_10012.t1	scaffold2348	41134	48247	943	9	105654
Juglans hindsii	JhAGO2A	Juhi_11349.t1	scaffold2536	128886	132305	881	9.13	99976.2
Juglans hindsii	JhAGO7	Juhi_12113.t1	scaffold2698	143652	147327	1012	9.35	115261
Juglans hindsii	JhAGO1B	Juhi_23089.t1	scaffold551	952082	959376	1073	9.49	118758
Juglans hindsii	JhAGO1C	Juhi_23090.t1	scaffold551	963975	973800	1040	9.37	115105
Juglans hindsii	JhAGO5A	Juhi_27181.t1	scaffold1005	253400	260441	992	9.57	110663
Juglans hindsii	JhAGO1A	Juhi_28659.t1	scaffold1224	792842	800198	1069	9.47	118326
Juglans microcarpa	JmAGO10C	Jumi_03463.t1	scaffold6206	394402	401988	931	9.33	104307
Juglans microcarpa	JmAGO4A	Jumi_03495.t1	scaffold6217	65267	72995	943	9.11	105666
Juglans microcarpa	JmAGO10B	Jumi_05536.t1	scaffold6750	155758	164596	940	9.23	106880
Juglans microcarpa	JmAGO6B	Jumi_10641.t1	scaffold8358	42614	51944	971	9.34	108205
Juglans microcarpa	JmAGO1A	Jumi_10892.t1	scaffold8483	67394	74441	1026	9.31	113253
Juglans microcarpa	JmAGO1C	Jumi_14742.t1	scaffold9816	1617	8752	580	9.16	64587.3
Juglans microcarpa	JmAGO7	Jumi_17666.t1	scaffold10119	38198	41873	1012	9.37	115219
Juglans microcarpa	JmAGO4B	Jumi_19086.t1	C794211	5577	12718	846	8.86	94803.1
Juglans microcarpa	JmAGO6A	Jumi_20394.t1	C801825	3572	7573	727	9.53	81263.5
Juglans microcarpa	JmAGO10A	Jumi_23144.t1	C811313	15210	25513	1065	9.24	119174
Juglans microcarpa	JmAGO2A	Jumi_27664.t1	scaffold1131	31622	39373	1233	9.19	136508
Juglans microcarpa	JmAGO5	Jumi_28686.t1	scaffold1397	319847	326840	989	9.59	110494
Juglans microcarpa	JmAGO2B	Jumi_37143.t1	scaffold4304	59307	63752	1005	9.39	112234
Juglans microcarpa	JmAGO1B	Jumi_39348.t2	scaffold4914	74723	82661	1073	9.51	118876
Juglans nigra	JnAGO4A	Juni_00056.t1	scaffold3	289598	297006	993	9.2	111169
Juglans nigra	JnAGO1B	Juni_01563.t1	scaffold4209	171705	179641	1073	9.51	118899
Juglans nigra	JnAGO10A	Juni_04817.t1	scaffold6674	247094	257160	1093	9.22	122311
Juglans nigra	JnAGO1A	Juni_05773.t1	scaffold394	905796	913106	1069	9.47	118300
Juglans nigra	JnAGO10B	Juni_06642.t1	scaffold4140	69896	78712	938	9.23	106621
Juglans nigra	JnAGO4B	Juni_07941.t1	scaffold455	34999	42139	846	8.86	94803.1
Juglans nigra	JnAGO1C	Juni_09650.t1	scaffold4209	184141	193765	940	9.27	103517
Juglans nigra	JnAGO5A	Juni_11123.t1	scaffold4276	317705	324708	992	9.58	110777
Juglans nigra	JnAGO10C	Juni_11292.t1	scaffold4120	23911	31962	1003	9.23	112554
Juglans nigra	JnAGO2A	Juni_12867.t1	scaffold5866	178323	188218	1292	9.23	143037
Juglans nigra	JnAGO6	Juni_15566.t1	scaffold2207	52068	58395	906	9.21	100969
Juglans nigra	JnAGO5B	Juni_21244.t1	scaffold182	74708	81963	1003	9.45	111640
Juglans nigra	JnAGO7	Juni_24734.t1	scaffold2917	629377	633057	1012	9.37	115201
Juglans nigra	JnAGO2B	Juni_24882.t1	scaffold2970	17100	21509	1005	9.35	112207
Juglans sigillata	JsAGO1B	OF00806	Chr15	6438785	6470393	3112	9.24	346862
Juglans sigillata	JsAGO7	OF05764	Chr01	8042030	8045718	1015	9.36	115789
Juglans sigillata	JsAGO4	OF07775	Chr01	32979190	32988931	998	9.14	111478
Juglans sigillata	JsAGO10C	OF13230	Chr11	23868590	23876397	996	9.21	111835
Juglans sigillata	JsAGO2A	OF14599	Chr09	25105217	25113118	1232	9.31	136445
Juglans sigillata	JsAGO2B	OF15978	Chr08	29655396	29659806	1006	9.4	112253
Juglans sigillata	JsAGO5A	OF16339	Chr16	4054923	4062028	995	9.58	111116
Juglans sigillata	JsAGO10A	OF22764	Chr03	33203069	33211623	980	9.14	109912
Juglans sigillata	JsAGO6	OF24095	Chr04	11705548	11711838	906	9.3	100959
Juglans sigillata	JsAGO1A	OF25504	Chr07	9831245	9839848	1065	9.44	118230
Juglans sigillata	JsAGO5B	OF27178	Chr12	5259247	5266316	990	9.48	109994
Juglans sigillata	JsAGO10B	OF29952	Chr02	9531546	9544474	934	9.27	106049
Pterocarya stenoptera	PsAGO2B	Ptst_01520.t1	C931109	107506	117991	872	9.2	98603.9
Pterocarya stenoptera	PsAGO10	Ptst_06634.t2	scaffold3876	214902	216143	750	8.99	84517.1
Pterocarya stenoptera	PsAGO4C	Ptst_13914.t1	scaffold5919	93526	95452	1002	8.75	112246
Pterocarya stenoptera	PsAGO2C	Ptst_15177.t1	scaffold6269	51905	53476	1005	9.35	112022
Pterocarya stenoptera	PsAGO5A	Ptst_21611.t1	scaffold7777	78830	83727	993	9.53	110621
Pterocarya stenoptera	PsAGO4A	Ptst_26445.t1	scaffold9295	129377	129853	960	8.76	107486
Pterocarya stenoptera	PsAGO1A	Ptst_27958.t1	scaffold9590	72350	77724	1081	9.5	119227
Pterocarya stenoptera	PsAGO1B	Ptst_27959.t1	scaffold9590	85350	88949	1017	9.36	112151
Pterocarya stenoptera	PsAGO6A	Ptst_32446.t1	C924045	44370	46896	982	9.48	110140
Pterocarya stenoptera	PsAGO5B	Ptst_34061.t1	C927855	32411	34904	919	9.68	102030
Pterocarya stenoptera	PsAGO7	Ptst_38492.t1	scaffold848	201487	203098	1011	9.37	115239
Pterocarya stenoptera	PsAGO5D	Ptst_41103.t2	scaffold1561	9293	18316	969	9.52	107390
Pterocarya stenoptera	PsAGO6B	Ptst_41548.t2	scaffold1689	996	3457	1360	9.12	150742
Pterocarya stenoptera	PsAGO2A	Ptst_41845.t1	scaffold1765	142995	144993	880	9.11	99878
Pterocarya stenoptera	PsAGO5E	Ptst_41979.t1	scaffold1804	46062	48591	907	9.37	100452
Pterocarya stenoptera	PsAGO5C	Ptst_41980.t1	scaffold1804	55333	57409	974	9.65	107955
Pterocarya stenoptera	PsAGO4B	Ptst_42799.t1	scaffold2059	90248	93217	937	8.98	104760

## Sheet: DRB
Supplementary table 3D
Species Name	Gene Name	Gene ID	Chr.	Location		Number of amino acids	Isoelectric point (PI)	Molecular weight (Da)
Carya cathayensis	CcDRB1B	Caca0576S0105	scaffold17401	1186781	1187200	139	5.39	15726.8
Carya cathayensis	CcDRB7	Caca0654S0015	scaffold20446	242144	251421	470	6.43	51448.5
Carya cathayensis	CcDRB1A	Caca0705S0006	scaffold23503	174992	192516	406	9.03	43606.9
Carya cathayensis	CcDRB6	Caca0864S0009	scaffold30351	268949	274725	406	8.75	43747.8
Carya cathayensis	CcDRB2	Caca1054S0004	scaffold40916	69104	73351	112	8.81	12928.9
Carya cathayensis	CcDRB4	Caca1097S0006	scaffold43416	61154	66455	470	6.6	51608.8
Carya cathayensis	CcDRB3-5.3	Caca1250S0056	scaffold51014	511266	513341	118	8.49	13300.4
Carya cathayensis	CcDRB3-5.2	Caca1310S0028	scaffold54619	285080	289597	406	8.84	43860.1
Carya cathayensis	CcDRB3-5.1	Caca1539S0025	scaffold66877	150605	153712	414	9.26	44580
Carya illinoinensis	CiDRB6	Cail0384S0006	scaffold37559	98720	105066	409	6.01	44909.3
Carya illinoinensis	CiDRB1B	Cail0906S0129	scaffold69793	2613649	2613987	519	9.33	55160.2
Carya illinoinensis	CiDRB3-5.3	Cail0942S0224	scaffold72015	2827716	2829991	414	9.17	44661.1
Carya illinoinensis	CiDRB3-5.1	Cail0948S0076	scaffold72348	1234242	1237310	409	6.06	44857.3
Carya illinoinensis	CiDRB4	Cail1006S0004	scaffold75904	80299	96836	409	6.06	44901.3
Carya illinoinensis	CiDRB1A	Cail1134S0032	scaffold87348	520893	526103	152	7.79	16716.1
Carya illinoinensis	CiDRB2	Cail1166S0051	scaffold91236	916067	920539	409	6.06	44871.3
Carya illinoinensis	CiDRB1C	Cail1210S0062	scaffold96015	808194	808660	581	9.25	64603.1
Carya illinoinensis	CiDRB3-5.2	Cail1520S0021	scaffold125015	181490	186099	274	11.08	29916.5
Juglans mandshurica	JmaDRB1	Jman013G0151200	GWHBEUN00000013	22304064	22309222	422	8.96	45361
Juglans mandshurica	JmaDRB3-5.3	Jman002G0349300	GWHBEUN00000002	43122861	43124580	508	9.6	55743.3
Juglans mandshurica	JmaDRB3-5.2	Jman005G0010700	GWHBEUN00000005	1069504	1075173	360	8.64	40626.4
Juglans mandshurica	JmaDRB3-5.1	Jman006G0003000	BEUN00000006	337033	339717	269	5	28727.4
Juglans mandshurica	JmaDRB6.1	Jman007G0115900	GWHBEUN00000007	17177147	17182770	501	9.26	55023.5
Juglans mandshurica	JmaDRB4	Jman008G0088100	GWHBEUN00000008	13497458	13512954	407	9.84	44348.4
Juglans cathayensis	JcDRB3-5.1	Juca_06643.t1	scaffold4386	113862	115795	397	9.57	43328.5
Juglans cathayensis	JcDRB3-5.2	Juca_09432.t1	scaffold5273	169140	173477	540	9.32	59893.7
Juglans cathayensis	JcDRB1	Juca_28374.t1	scaffold1164	253488	258006	366	5.85	39283.2
Juglans cathayensis	JcDRB7	Juca_30175.t1	scaffold1673	151120	152464	539	9.25	59679.2
Juglans cathayensis	JcDRB6	Juca_33277.t1	scaffold2562	24214	29474	539	9.25	59679.2
Juglans hindsii	JhDRB1	Juhi_08671.t1	scaffold2159	392669	397024	563	9.29	62684.8
Juglans hindsii	JhDRB6	Juhi_12503.t1	scaffold404	911526	916959	540	9.31	59786.4
Juglans hindsii	JhDRB3-5.1	Juhi_15361.t1	scaffold3444	8258	10392	366	5.85	39283.2
Juglans hindsii	JhDRB3-5.2	Juhi_17050.t1	scaffold4200	220202	224383	366	5.67	39295.1
Juglans hindsii	JhDRB4	Juhi_21038.t1	C669691	444725	457404	367	5.67	39366.2
Juglans microcarpa	JmDRB1.2	Jumi_04222.t1	scaffold519	96505	102847	539	9.35	59059.1
Juglans microcarpa	JmDRB3-5.1	Jumi_04715.t1	scaffold6571	12726	13988	517	9.35	56697.3
Juglans microcarpa	JmDRB2	Jumi_10862.t1	scaffold8467	14545	15218	540	9.31	59758.5
Juglans microcarpa	JmDRB6	Jumi_18127.t1	scaffold10172	83556	89001	280	null	null
Juglans microcarpa	JmDRB4B	Jumi_26565.t1	C816723	29714	42503	97	9.13	10793.2
Juglans microcarpa	JmDRB1.1	Jumi_32694.t2	scaffold2087	58778	63799	367	5.68	39422.3
Juglans microcarpa	JmDRB4A	Jumi_37450.t1	scaffold4383	107735	120520	517	9.49	56877.5
Juglans microcarpa	JmDRB3-5.2	Jumi_39051.t2	scaffold4824	251470	253602	540	9.3	59854.6
Juglans nigra	JnDRB2	Juni_03600.t1	C543797	62462	66760	520	9.55	56920.6
Juglans nigra	JnDRB6	Juni_03981.t1	scaffold7256	324614	326149	366	5.68	39351.2
Juglans nigra	JnDRB3-5.1	Juni_08580.t1	C544183	221470	224325	367	5.68	39422.3
Juglans nigra	JnDRB1.1	Juni_12040.t1	scaffold2387	93369	97862	414	9.25	44656.1
Juglans nigra	JnDRB4	Juni_18620.t1	C542823	120154	132933	494	null	null
Juglans nigra	JnDRB1.2	Juni_21225.t1	scaffold2387	93369	97862	497	null	null
Juglans sigillata	JsDRB6	OF00059	Chr07	17413588	17419048	542	8.82	59855.6
Juglans sigillata	JsDRB3-5.1	OF05450	Chr02	46002483	46004428	151	8.15	16889.8
Juglans sigillata	JsDRB4	OF15351	Chr09	11490409	11496159	546	9.07	60317.2
Juglans sigillata	JsDRB3-5.3	OF22196	Chr05	1599748	1604503	540	9.38	59916.7
Juglans sigillata	JsDRB3-5.2	OF25053	Chr04	781340	783049	414	8.96	44676.1
Pterocarya stenoptera	PsDRB1.1	Ptst_03458.t2	scaffold3116	292111	304580	414	6.36	45446
Pterocarya stenoptera	PsDRB2	Ptst_07592.t1	scaffold4132	8532	11477	414	6.36	45446
Pterocarya stenoptera	PsDRB3-5.1	Ptst_14059.t1	scaffold5952	29914	33413	414	6.36	45446
Pterocarya stenoptera	PsDRB6.2	Ptst_22257.t1	scaffold8007	239883	240944	330	7.56	35725.3
Pterocarya stenoptera	PsDRB7	Ptst_23012.t1	scaffold8274	60891	61751	329	7.56	35654.2
Pterocarya stenoptera	PsDRB3-5.2	Ptst_39248.t1	scaffold1020	341789	346204	103	11.03	11431.4
Pterocarya stenoptera	PsDRB3-5.3	Ptst_40973.t1	scaffold1522	13931	15019	536	9.38	58866
Pterocarya stenoptera	PsDRB3-5.4	Ptst_40975.t1	scaffold1522	20535	21188	361	9.17	39133.6
Pterocarya stenoptera	PsDRB6.1	Ptst_43049.t1	scaffold2169	308348	323050	285	9.4	30572
Juglans microcarpa x Juglans regia	jmrDRB6.1	LOC121242543	NC_054608.1	17502188	17507955	285	9.4	30572
Juglans microcarpa x Juglans regia	jmrDRB2	LOC121252004	NC_054597.1	294733	297114	433	9.06	46724.6
Juglans microcarpa x Juglans regia	jmrDRB3-5.1	LOC121261484	NC_054600.1	1208136	1213956	443	9.06	47832.9
Juglans microcarpa x Juglans regia	jmrDRB1.1	LOC121263030	NC_054601.1	5795453	5800519	540	9.23	59785.5
Juglans microcarpa x Juglans regia	jmrDRB4A	LOC121264913	NC_054602.1	21852596	21866293	409	6.06	44875.2
