# Supplementary material for: RNA Interference Pathways in <em>Juglandaceae</em>: Based on Gene Diversity, Evolution, and Functional Differentiation
Source: Preprints.org preprint supplement (doi:10.20944/preprints202210.0323.v1), 2022-10-21
Supplement: Supplementary file 4 [file Supplementary table 4.xlsx]

## Sheet: DCL
Supplementary table 4A
Gene A	Gene B	Ka	Ks	Ka_Ks	Myr
JrDCL1	CiDCL1	0.013155	0.0727777	0.180756	4.85185
JrDCL1	JcDCL1	0	0	0	0
JrDCL1	JhDCL1	0	0	0	0
JrDCL1	JmaDCL1	0.00467723	0.0353949	0.132144	2.35966
JrDCL1	JmDCL1	0.00326052	0.0296811	0.109852	1.97874
JrDCL1	JnDCL1	0.0145945	0.0405201	0.360179	2.70134
JrDCL1	JsDCL1	0.0168036	0.0346038	0.4856	2.30692
JrDCL2a	CcDCL2A	0.100304	0.352912	0.284219	23.5275
JrDCL2a	CcDCL2B	0.0312458	0.0586996	0.532301	3.9133
JrDCL2a	CiDCL2A	0.0985786	0.347444	0.283725	23.1629
JrDCL2a	CiDCL2B	0.0282801	0.0675534	0.418633	4.50356
JrDCL2a	JcDCL2	0	0	0	0
JrDCL2a	JhDCL2	0	0	0	0
JrDCL2a	JmDCL2A	0.0975944	0.328712	0.296899	21.9141
JrDCL2a	JmDCL2B	0.1004	0.342236	0.293363	22.8158
JrDCL2a	JmDCL2C	0.0241275	0.059886	0.402891	3.9924
JrDCL2a	JnDCL2A	0.0960714	0.331175	0.290092	22.0783
JrDCL2a	JnDCL2B	0.0960714	0.331175	0.290092	22.0783
JrDCL2a	JnDCL2C	1.82721	1.26165	1.44827	84.1099
JrDCL2a	JnDCL2D	0.0957375	0.324522	0.295011	21.6348
JrDCL2a	JsDCL2A	0.0266454	0.0644537	0.413403	4.29692
JrDCL2a	JsDCL2B	0.0977865	0.34621	0.282448	23.0807
JrDCL2a	JsDCL2C	0.188307	0.470744	0.400021	31.3829
JrDCL2a	PsDCL2A	0.0969672	0.333118	0.29109	22.2078
JrDCL2b	CcDCL2A	0.0406938	0.0971702	0.418789	6.47802
JrDCL2b	CcDCL2B	0.108452	0.286442	0.378618	19.0961
JrDCL2b	CiDCL2A	0.0366589	0.0988472	0.370865	6.58981
JrDCL2b	CiDCL2B	0.0990158	0.31877	0.310618	21.2513
JrDCL2b	JcDCL2	0	0	0	0
JrDCL2b	JhDCL2	0	0	0	0
JrDCL2b	JmDCL2A	0.0122268	0.0415724	0.29411	2.77149
JrDCL2b	JmDCL2B	0.0196099	0.047509	0.412761	3.16727
JrDCL2b	JmDCL2C	0.10781	0.303685	0.355006	20.2457
JrDCL2b	JnDCL2A	0.0125416	0.0448783	0.279458	2.99188
JrDCL2b	JnDCL2B	0.0125416	0.0448783	0.279458	2.99188
JrDCL2b	JnDCL2C	0	0	0	0
JrDCL2b	JnDCL2D	0.0123164	0.0429855	0.286526	2.8657
JrDCL2b	JsDCL2A	0.10996	0.350651	0.313588	23.3767
JrDCL2b	JsDCL2B	0.00493055	0.0169754	0.290454	1.13169
JrDCL2b	JsDCL2C	0.118259	0.179622	0.658378	11.9748
JrDCL2b	PsDCL2A	0.0222595	0.0560552	0.397099	3.73702
JrDCL3	CcDCL3	0.0154078	0.0528157	0.291727	3.52105
JrDCL3	CiDCL3	0.017144	0.0523009	0.327795	3.48673
JrDCL3	JcDCL3	0	0	0	0
JrDCL3	JhDCL3	0	0	0	0
JrDCL3	JmDCL3	0.0434691	0.0775129	0.560798	5.16753
JrDCL3	JnDCL3	0	0	0	0
JrDCL3	JsDCL3	0.000260711	0.0008726	0.298775	0.0581734
JrDCL3	PsDCL3	0.0165594	0.0338438	0.489288	2.25625
JrDCL4	CcDCL4	0.0189193	0.0608426	0.310954	4.05617
JrDCL4	CiDCL4	0.0190579	0.0584148	0.326251	3.89432
JrDCL4	JhDCL4	0.801786	0	0	0
JrDCL4	JmDCL4	0.222315	0.315632	0.70435	21.0421
JrDCL4	JnDCL4	1.35211	1.66727	0.810969	111.152
JrDCL4	JsDCL4	0.0172434	0.0185149	0.931327	1.23433
JrDCL4	PsDCL4	0.0192348	0.0451983	0.425564	3.01322

## Sheet: DRB
Supplementary table 4B
Gene A	Gene B	Ka	Ks	Ka_Ks	Myr
JrDRB4A	CcDRB4	0.920331	3.54205	0.25983	236.137
JrDRB4A	CiDRB4	0.037021	0.0851453	0.434799	5.67635
JrDRB4A	JmaDRB4	0.0215377	0.0396251	0.543538	2.64167
JrDRB4A	JhDRB4	0	0	0	0
JrDRB4A	JmDRB4B	0.0199097	0.0488566	0.407513	3.25711
JrDRB4A	JmDRB4A	0.0199061	0.0488861	0.407194	3.25907
JrDRB4A	JnDRB4	0.762988	0	0	0
JrDRB4A	JsDRB4	0.0779702	0.103944	0.750114	6.92963
JrDRB4A	jmrDRB4A	0.0188233	0.0450992	0.417374	3.00662
JrDRB1.1	CcDRB1A	0.837662	2.08061	0.402604	138.707
JrDRB1.1	CiDRB1B	0.118916	0.166951	0.712281	11.1301
JrDRB1.1	CiDRB1A	0.0252504	0.100463	0.251339	6.69756
JrDRB1.1	CiDRB1C	0.16137	0.187122	0.862377	12.4748
JrDRB1.1	JmaDRB1	0.0101434	0.0219431	0.462258	1.46287
JrDRB1.1	JcDRB1	0	0	0	0
JrDRB1.1	JhDRB1	1.67251	1.57286	1.06336	104.857
JrDRB1.1	JmDRB1.2	0.795424	1.86898	0.425593	124.599
JrDRB1.1	JmDRB1.1	0.0137317	0.0299043	0.459189	1.99362
JrDRB1.1	JnDRB1.1	0	0	0	0
JrDRB1.1	JnDRB1.2	0	0	0	0
JrDRB1.1	PsDRB1.1	0.0308076	0.063088	0.488328	4.20587
JrDRB1.1	jmrDRB1.1	0.0267886	0.0494191	0.542069	3.2946
JrDRB1.2	CcDRB1A	0.839929	2.36898	0.354554	157.932
JrDRB1.2	CiDRB1B	0.118916	0.166951	0.712281	11.1301
JrDRB1.2	CiDRB1A	0.0253112	0.100886	0.250888	6.72576
JrDRB1.2	CiDRB1C	0.16137	0.187122	0.862377	12.4748
JrDRB1.2	JmaDRB1	0.0101434	0.0219431	0.462258	1.46287
JrDRB1.2	JcDRB1	0	0	0	0
JrDRB1.2	JhDRB1	1.31278	0.907378	1.44678	60.4919
JrDRB1.2	JmDRB1.2	0.795424	1.86898	0.425593	124.599
JrDRB1.2	JmDRB1.1	0.0137646	0.030024	0.458453	2.0016
JrDRB1.2	JnDRB1.1	0	0	0	0
JrDRB1.2	JnDRB1.2	0	0	0	0
JrDRB1.2	PsDRB1.1	0.0308823	0.063346	0.487517	4.22307
JrDRB1.2	jmrDRB1.1	0.0268605	0.0496422	0.541083	3.30948
JrDRB2.1	CcDRB2	0.0975379	0.358655	0.271955	23.9103
JrDRB2.1	CiDRB2	0.0962225	0.364574	0.263931	24.305
JrDRB2.1	JmDRB2	0.203019	0	0	0
JrDRB2.1	JnDRB2	1.53729	0	0	0
JrDRB2.1	PsDRB2	0.438523	0	0	0
JrDRB2.1	jmrDRB2	0.48862	0	0	0
JrDRB2.2	CcDRB2	0.0263663	0.069034	0.381931	4.60227
JrDRB2.2	CiDRB2	0.0275234	0.0727423	0.378369	4.84949
JrDRB2.2	JmDRB2	0.203545	0	0	0
JrDRB2.2	JnDRB2	1.44948	0	0	0
JrDRB2.2	PsDRB2	0.509588	0	0	0
JrDRB2.2	jmrDRB2	0.395425	0	0	0
JrDRB3-5.1	CcDRB6	0.829441	2.86287	0.289724	190.858
JrDRB3-5.1	CiDRB6	0.809882	2.96786	0.272885	197.857
JrDRB3-5.1	JmaDRB6.1	0.861599	2.55727	0.336921	170.485
JrDRB3-5.1	JcDRB6	0	0	0	0
JrDRB3-5.1	JhDRB6	0	0	0	0
JrDRB3-5.1	JmDRB6	0.810447	0	0	0
JrDRB3-5.1	JnDRB6	1.02631	0	0	0
JrDRB3-5.1	JsDRB6	0.794612	5.68053	0.139883	378.702
JrDRB3-5.1	PsDRB6.2	0.916055	0	0	0
JrDRB3-5.1	PsDRB6.1	0.833075	0	0	0
JrDRB3-5.1	jmrDRB6.1	0.812191	5.09818	0.15931	339.878
JrDRB3-5.2	CcDRB6	0.754058	1.73814	0.43383	115.876
JrDRB3-5.2	CiDRB6	0.744528	1.81374	0.410493	120.916
JrDRB3-5.2	JmaDRB6.1	0.760375	1.74963	0.434591	116.642
JrDRB3-5.2	JcDRB6	0	0	0	0
JrDRB3-5.2	JhDRB6	0	0	0	0
JrDRB3-5.2	JmDRB6	0.797773	1.76063	0.453118	117.375
JrDRB3-5.2	JnDRB6	0	0	0	0
JrDRB3-5.2	JsDRB6	0.816512	1.77868	0.459054	118.579
JrDRB3-5.2	PsDRB6.2	0.874199	0	0	0
JrDRB3-5.2	PsDRB6.1	0.798327	1.9327	0.413063	128.847
JrDRB3-5.2	jmrDRB6.1	0.797773	1.80621	0.441682	120.414
JrDRB3-5.3	CcDRB6	0.768195	3.29119	0.233409	219.413
JrDRB3-5.3	CiDRB6	0.743554	4.98098	0.149279	332.065
JrDRB3-5.3	JmaDRB6.1	0.801486	0	0	0
JrDRB3-5.3	JcDRB6	0	0	0	0
JrDRB3-5.3	JhDRB6	0	0	0	0
JrDRB3-5.3	JmDRB6	0.766458	0	0	0
JrDRB3-5.3	JnDRB6	0.569058	0	0	0
JrDRB3-5.3	JsDRB6	0.720891	0	0	0
JrDRB3-5.3	PsDRB6.2	0.897715	0	0	0
JrDRB3-5.3	PsDRB6.1	0.770921	3.42793	0.224894	228.529
JrDRB3-5.3	jmrDRB6.1	0.768187	0	0	0
JrDRB3-5.4	CcDRB6	0.785679	3.82499	0.205407	255
JrDRB3-5.4	CiDRB6	0.74774	0	0	0
JrDRB3-5.4	JmaDRB6.1	0.801486	0	0	0
JrDRB3-5.4	JcDRB6	0	0	0	0
JrDRB3-5.4	JhDRB6	0	0	0	0
JrDRB3-5.4	JmDRB6	0.785836	0	0	0
JrDRB3-5.4	JnDRB6	0.774413	0	0	0
JrDRB3-5.4	JsDRB6	0.739729	0	0	0
JrDRB3-5.4	PsDRB6.2	0.968096	2.51486	0.38495	167.657
JrDRB3-5.4	PsDRB6.1	0.774622	3.84326	0.201554	256.217
JrDRB3-5.4	jmrDRB6.1	0.787536	0	0	0
JrDRB7.4	CcDRB7	0.929359	3.39945	0.273385	226.63
JrDRB7.4	JcDRB7	0	0	0	0
JrDRB7.4	PsDRB7	0.954332	0	0	0
JrDRB7.2	CcDRB7	0.937357	2.01077	0.466169	134.051
JrDRB7.2	JcDRB7	0	0	0	0
JrDRB7.2	PsDRB7	0.99496	0	0	0
JrDRB7.3	CcDRB7	0.756371	1.90796	0.39643	127.197
JrDRB7.3	JcDRB7	0	0	0	0
JrDRB7.3	PsDRB7	1.00346	0	0	0
JrDRB7.1	CcDRB7	0.389954	0.626835	0.6221	41.789
JrDRB7.1	JcDRB7	0	0	0	0
JrDRB7.1	PsDRB7	0.812099	2.07428	0.391508	138.286
JrDRB6.2	CcDRB6	0.153917	0.272563	0.564705	18.1708
JrDRB6.2	CiDRB6	0.14723	0.271059	0.543166	18.0706
JrDRB6.2	JmaDRB6.1	0.136281	0.27401	0.497357	18.2674
JrDRB6.2	JcDRB6	0	0	0	0
JrDRB6.2	JhDRB6	0	0	0	0
JrDRB6.2	JmDRB6	0.154017	0.246999	0.623552	16.4666
JrDRB6.2	JnDRB6	0	0	0	0
JrDRB6.2	JsDRB6	0.142882	0.249362	0.57299	16.6242
JrDRB6.2	PsDRB6.2	0.147076	0.326837	0.449999	21.7891
JrDRB6.2	PsDRB6.1	0.152381	0.25182	0.605121	16.788
JrDRB6.2	jmrDRB6.1	0.154017	0.246999	0.623552	16.4666
JrDRB6.1	CcDRB6	0.188866	0.33386	0.565702	22.2574
JrDRB6.1	CiDRB6	0.197736	0.326686	0.605278	21.7791
JrDRB6.1	JmaDRB6.1	0.15803	0.297035	0.532024	19.8024
JrDRB6.1	JcDRB6	0	0	0	0
JrDRB6.1	JhDRB6	0	0	0	0
JrDRB6.1	JmDRB6	0.159263	0.252883	0.629789	16.8589
JrDRB6.1	JnDRB6	0	0	0	0
JrDRB6.1	JsDRB6	0.195661	0.297242	0.658256	19.8161
JrDRB6.1	PsDRB6.2	0.164014	0.356207	0.460446	23.7471
JrDRB6.1	PsDRB6.1	0.174393	0.274367	0.63562	18.2911
JrDRB6.1	jmrDRB6.1	0.159263	0.252883	0.629789	16.8589

## Sheet: RDR
Supplementary table 4C
Gene A	Gene B	Ka	Ks	Ka_Ks	Myr
JrRDR2	CiRDR2	0.021278	0.0605834	0.351219	4.03889
JrRDR2	JcRDR2	0	0	0	0
JrRDR2	JhRDR2A	0.0064839	0.0217702	0.297833	1.45135
JrRDR2	JhRDR2B	0	0	0	0
JrRDR2	JmRDR2.1	0.0210913	0.0594225	0.354937	3.9615
JrRDR2	JmRDR2.2	0.00786721	0.0386321	0.203644	2.57548
JrRDR2	JnRDR2	1.04088	1.15419	0.901829	76.9462
JrRDR2	JsRDR2	0.00117944	0.00802773	0.146921	0.535182
JrRDR3	CiRDR3	0.0449612	0.0614901	0.731194	4.09934
JrRDR3	JmaRDR3	0.0401079	0.0621676	0.645158	4.14451
JrRDR3	JcRDR3	0	0	0	0
JrRDR3	JhRDR3A	0	0	0	0
JrRDR3	JhRDR3B	0	0	0	0
JrRDR3	JmRDR3	0.0288807	0.0538502	0.536317	3.59001
JrRDR3	JnRDR3	0.0215684	0.0399284	0.540175	2.6619
JrRDR3	JsRDR3	0.00220167	0.00761815	0.289004	0.507876
JrRDR3	PsRDR3A	0.039648	0.0686696	0.577373	4.57798
JrRDR3	PsRDR3B	0.0730492	0.136537	0.535013	9.10247
JrRDR6a	CcRDR6	0.03498	0.0641688	0.545125	4.27792
JrRDR6a	CiRDR6A	0.0815444	0.129606	0.629171	8.64041
JrRDR6a	CiRDR6B	0.0344315	0.0783481	0.439469	5.2232
JrRDR6a	JmaRDR6	0.0215674	0.0490104	0.440057	3.26736
JrRDR6a	JcRDR6A	0	0	0	0
JrRDR6a	JcRDR6B	0	0	0	0
JrRDR6a	JcRDR6C	0.0918655	0.138629	0.662674	9.24191
JrRDR6a	JhRDR6B	0	0	0	0
JrRDR6a	JhRDR6A	0	0	0	0
JrRDR6a	JmRDR6.3	0.0402627	0.0507016	0.794111	3.3801
JrRDR6a	JmRDR6.2	0.0156954	0.0481053	0.326273	3.20702
JrRDR6a	JmRDR6.3	0.0402627	0.0507016	0.794111	3.3801
JrRDR6a	JnRDR6.1	0.932805	0	0	0
JrRDR6a	JnRDR6.2	0.0500947	0.0673842	0.743419	4.49228
JrRDR6a	JsRDR6A	0	0.00124896	0	0.083264
JrRDR6a	JsRDR6C	0.0495911	0.0748472	0.662565	4.98981
JrRDR6a	JsRDR6B	0.0080571	0.0135444	0.594866	0.902959
JrRDR6a	PsRDR6B	0.0305922	0.0419905	0.728552	2.79937
JrRDR6a	PsRDR6D	0.036447	0.0525908	0.693029	3.50605
JrRDR6a	PsRDR6A	0.0247896	0.0605219	0.409598	4.03479
JrRDR6a	PsRDR6C	0.0236631	0.0619742	0.381821	4.13161
JrRDR6b	CcRDR6	0.0470393	0.0793001	0.593181	5.28668
JrRDR6b	CiRDR6A	0.0834112	0.142543	0.585164	9.50289
JrRDR6b	CiRDR6B	0.0458358	0.0942868	0.486131	6.28579
JrRDR6b	JmaRDR6	0.0196548	0.0559163	0.351505	3.72775
JrRDR6b	JcRDR6A	0	0	0	0
JrRDR6b	JcRDR6B	0	0	0	0
JrRDR6b	JcRDR6C	0.0874941	0.141317	0.619134	9.42112
JrRDR6b	JhRDR6B	0	0	0	0
JrRDR6b	JhRDR6A	0	0	0	0
JrRDR6b	JmRDR6.3	0.206321	0.247452	0.833782	16.4968
JrRDR6b	JmRDR6.2	0.0268042	0.0529957	0.50578	3.53305
JrRDR6b	JmRDR6.3	0.206321	0.247452	0.833782	16.4968
JrRDR6b	JnRDR6.1	0.926938	0	0	0
JrRDR6b	JnRDR6.2	0.101404	0.148442	0.683125	9.8961
JrRDR6b	JsRDR6A	0.0174219	0.0234118	0.744153	1.56078
JrRDR6b	JsRDR6C	0.0507907	0.0613929	0.827305	4.09286
JrRDR6b	JsRDR6B	0.0143175	0.0165686	0.864131	1.10457
JrRDR6b	PsRDR6B	0.068188	0.0739433	0.922166	4.92955
JrRDR6b	PsRDR6D	0.035579	0.0555942	0.639976	3.70628
JrRDR6b	PsRDR6A	0.0394797	0.0799829	0.493601	5.33219
JrRDR6b	PsRDR6C	0.0389021	0.0812082	0.479042	5.41388
JrRDR1a	CcRDR1C	0.250894	1.23432	0.203264	82.2881
JrRDR1a	CcRDR1B	0.251928	1.13151	0.222647	75.4341
JrRDR1a	CcRDR1A	0.265572	1.13732	0.233508	75.821
JrRDR1a	CiRDR1A	0.254009	1.17498	0.216182	78.3318
JrRDR1a	CiRDR1B	0.334436	1.06734	0.313334	71.1563
JrRDR1a	CiRDR1C	0.0927822	0.0890949	1.04139	5.93966
JrRDR1a	CiRDR1D	0.0521752	0.0684018	0.762776	4.56012
JrRDR1a	CiRDR1E	0.286964	1.1863	0.241899	79.0864
JrRDR1a	CiRDR1F	0.313764	1.28066	0.245002	85.3771
JrRDR1a	CiRDR1G	0.261694	1.06081	0.246693	70.7207
JrRDR1a	CiRDR1H	0	0	0	0
JrRDR1a	CiRDR1I	0.267577	1.34651	0.198719	89.7675
JrRDR1a	CiRDR1J	0	0	0	0
JrRDR1a	CiRDR1K	0.264653	1.13347	0.233489	75.5647
JrRDR1a	JcRDR1C	0	0	0	0
JrRDR1a	JcRDR1G	0	0	0	0
JrRDR1a	JcRDR1D	0	0	0	0
JrRDR1a	JcRDR1A	0	0	0	0
JrRDR1a	JcRDR1B	0.258743	1.13659	0.227647	75.773
JrRDR1a	JcRDR1H	0	0	0	0
JrRDR1a	JcRDR1F	0	0	0	0
JrRDR1a	JcRDR1J	0	0	0	0
JrRDR1a	JcRDR1I	0	0	0	0
JrRDR1a	JcRDR1K	0.488475	0	0	0
JrRDR1a	JcRDR1E	0	0	0	0
JrRDR1a	JhRDR1.8	0	0	0	0
JrRDR1a	JhRDR1.9	0	0	0	0
JrRDR1a	JhRDR1.1	0	0	0	0
JrRDR1a	JhRDR1.10	0	0	0	0
JrRDR1a	JhRDR1.6	0	0	0	0
JrRDR1a	JhRDR1.11	0	0	0	0
JrRDR1a	JhRDR1.7	0	0	0	0
JrRDR1a	JhRDR1.12	0	0	0	0
JrRDR1a	JhRDR1.13	0	0	0	0
JrRDR1a	JhRDR1.14	0	0	0	0
JrRDR1a	JhRDR1.5	0	0	0	0
JrRDR1a	JhRDR1.15	0	0	0	0
JrRDR1a	JhRDR1.3	0	0	0	0
JrRDR1a	JhRDR1.16	0	0	0	0
JrRDR1a	JhRDR1.2	0	0	0	0
JrRDR1a	JhRDR1.17	0.844961	1.12173	0.753266	74.7819
JrRDR1a	JhRDR1.18	0	0	0	0
JrRDR1a	JhRDR1.19	0	0	0	0
JrRDR1a	JhRDR1.4	0	0	0	0
JrRDR1a	JhRDR1.20	0	0	0	0
JrRDR1a	JmRDR1.1	0.303944	1.14734	0.264911	76.4896
JrRDR1a	JmRDR1.2	0.25414	1.11737	0.227445	74.4912
JrRDR1a	JmRDR1.3	0.265874	1.11927	0.237543	74.6178
JrRDR1a	JmRDR1.4	0.295503	1.27215	0.232286	84.8101
JrRDR1a	JmRDR1.5	0.127271	0.234191	0.54345	15.6127
JrRDR1a	JmRDR1.6	0.204455	1.27072	0.160897	84.7147
JrRDR1a	JmRDR1.7	0.288637	1.0994	0.262539	73.2936
JrRDR1a	JmRDR1.8	0.238362	1.12549	0.211786	75.0324
JrRDR1a	JmRDR1.9	0.251132	1.17837	0.213118	78.5581
JrRDR1a	JmRDR1.10	0.243364	1.12343	0.216625	74.8954
JrRDR1a	JmRDR1.11	0.282445	1.39823	0.202002	93.2152
JrRDR1a	JmRDR1.12	0.31658	1.22446	0.258548	81.6303
JrRDR1a	JmRDR1.13	0.393085	1.25236	0.313876	83.4906
JrRDR1a	JmRDR1.14	0.295027	1.2164	0.242542	81.093
JrRDR1a	JmRDR1.15	0.292236	1.11494	0.26211	74.329
JrRDR1a	JmRDR1.16	0.233809	1.21113	0.19305	80.7419
JrRDR1a	JmRDR1.17	0	0	0	0
JrRDR1a	JmRDR1.18	0.281478	1.44498	0.194797	96.3317
JrRDR1a	JmRDR1.19	0.293984	1.23548	0.237952	82.3651
JrRDR1a	JmRDR1.20	0	0	0	0
JrRDR1a	JmRDR1.21	0.266806	1.11155	0.24003	74.1035
JrRDR1a	JmRDR1.22	0.218287	1.11112	0.196456	74.075
JrRDR1a	JmRDR1.23	0.267903	1.09384	0.24492	72.9226
JrRDR1a	JmRDR1.24	0.316226	1.1024	0.286852	73.4934
JrRDR1a	JmRDR1.25	0.29311	1.17099	0.25031	78.066
JrRDR1a	JmRDR1.26	0.298154	1.27215	0.23437	84.8101
JrRDR1a	JmRDR1.27	0.0126701	0.0333469	0.379949	2.22313
JrRDR1a	JmRDR1.28	0.272179	1.08873	0.249997	72.5817
JrRDR1a	JmRDR1.29	0.283757	1.19113	0.238225	79.4087
JrRDR1a	JmRDR1.30	0.282518	1.13904	0.248031	75.9363
JrRDR1a	JmRDR1.31	0.250043	1.18802	0.21047	79.2014
JrRDR1a	JnRDR1.1	0.950731	2.73874	0.347141	182.583
JrRDR1a	JnRDR1.2	1.1611	0	0	0
JrRDR1a	JnRDR1.3	0.88134	0	0	0
JrRDR1a	JnRDR1.4	0	0	0	0
JrRDR1a	JnRDR1.5	0	0	0	0
JrRDR1a	JnRDR1.6	0	0	0	0
JrRDR1a	JnRDR1.7	0	0	0	0
JrRDR1a	JnRDR1.8	0.705909	0	0	0
JrRDR1a	JnRDR1.9	0	0	0	0
JrRDR1a	JnRDR1.10	0	0	0	0
JrRDR1a	JnRDR1.11	0	0	0	0
JrRDR1a	JnRDR1.12	0	0	0	0
JrRDR1a	JnRDR1.13	1.39489	1.5486	0.900744	103.24
JrRDR1a	JnRDR1.14	0.633873	2.10252	0.301482	140.168
JrRDR1a	JnRDR1.15	0	0	0	0
JrRDR1a	JnRDR1.16	0	0	0	0
JrRDR1a	JnRDR1.17	0	0	0	0
JrRDR1a	JnRDR1.18	0	0	0	0
JrRDR1a	JnRDR1.19	0.558566	0	0	0
JrRDR1a	JnRDR1.20	0.265065	1.14131	0.232247	76.0871
JrRDR1a	JnRDR1.21	0	0	0	0
JrRDR1a	JnRDR1.22	0	0	0	0
JrRDR1a	JnRDR1.23	0	0	0	0
JrRDR1a	JnRDR1.24	0	0	0	0
JrRDR1a	JsRDR1.1	0.26379	1.09088	0.241813	72.7256
JrRDR1a	JsRDR1.2	0.216246	0.94028	0.22998	62.6854
JrRDR1a	JsRDR1.3	0.32314	1.22422	0.263955	81.6148
JrRDR1a	JsRDR1.4	0.00190852	0	#NAME?	0
JrRDR1a	JsRDR1.5	0.259697	1.10101	0.235873	73.4004
JrRDR1a	JsRDR1.6	0.258282	1.13285	0.227993	75.5235
JrRDR1a	JsRDR1.7	0.238175	1.07455	0.221651	71.6367
JrRDR1a	JsRDR1.8	0.243982	1.13418	0.215118	75.6118
JrRDR1a	JsRDR1.9	0.259128	1.05587	0.245416	70.3916
JrRDR1a	JsRDR1.10	0	0	0	0
JrRDR1a	JsRDR1.11	0	0	0	0
JrRDR1a	JsRDR1.12	0.244903	1.1362	0.215546	75.7465
JrRDR1a	PsRDR1.5	0.207081	1.30052	0.15923	86.7011
JrRDR1a	PsRDR1.6	0	0	0	0
JrRDR1a	PsRDR1.7	0.212442	1.12411	0.188987	74.9405
JrRDR1a	PsRDR1.22	0.253562	1.09343	0.231897	72.8951
JrRDR1a	PsRDR1.23	0.300084	1.10079	0.272608	73.386
JrRDR1a	PsRDR1.24	0.234545	1.07732	0.217712	71.8213
JrRDR1a	PsRDR1.13	0.263614	1.13195	0.232885	75.4632
JrRDR1a	PsRDR1.28	0.0441275	0.0675981	0.652792	4.50654
JrRDR1a	PsRDR1.1	0.256307	1.09813	0.233403	73.2086
JrRDR1a	PsRDR1.2	0.254684	1.11888	0.227625	74.5917
JrRDR1a	PsRDR1.25	0.267546	1.01423	0.263791	67.6155
JrRDR1a	PsRDR1.29	0.0359819	0.059091	0.608924	3.9394
JrRDR1a	PsRDR1.30	0.0565214	0.100927	0.560021	6.72848
JrRDR1a	PsRDR1.8	0.239854	1.06757	0.224673	71.1714
JrRDR1a	PsRDR1.9	0.246183	1.1511	0.213868	76.7399
JrRDR1a	PsRDR1.26	0.261432	1.07727	0.242679	71.8181
JrRDR1a	PsRDR1.27	0.264002	1.11056	0.237719	74.0375
JrRDR1a	PsRDR1.12	0.255405	1.08371	0.235677	72.2474
JrRDR1a	PsRDR1.14	0.267354	1.05938	0.25237	70.6251
JrRDR1a	PsRDR1.15	0.276978	1.15021	0.240806	76.6808
JrRDR1a	PsRDR1.16	0.316567	1.13767	0.27826	75.8445
JrRDR1a	PsRDR1.3	0.256375	1.07925	0.23755	71.9497
JrRDR1a	PsRDR1.4	0.378209	1.2024	0.314544	80.1602
JrRDR1a	PsRDR1.17	0.275129	1.12596	0.244351	75.0641
JrRDR1a	PsRDR1.18	0.25648	1.04297	0.245913	69.5314
JrRDR1a	PsRDR1.19	0.279215	1.03637	0.269416	69.0914
JrRDR1a	PsRDR1.20	0.248863	1.41266	0.176166	94.1775
JrRDR1a	PsRDR1.21	0.286872	1.08455	0.264506	72.3036
JrRDR1a	PsRDR1.10	0.217794	1.18295	0.184111	78.8633
JrRDR1a	PsRDR1.11	0.261766	1.12588	0.232499	75.0587
JrRDR1b	CcRDR1C	0.0902728	0.184726	0.488684	12.3151
JrRDR1b	CcRDR1B	0.0564561	0.138927	0.406374	9.26177
JrRDR1b	CcRDR1A	0.0622399	0.158184	0.393465	10.5456
JrRDR1b	CiRDR1A	0.0568601	0.138165	0.411537	9.21101
JrRDR1b	CiRDR1B	0.142998	0.220851	0.647486	14.7234
JrRDR1b	CiRDR1C	0.294852	1.17197	0.251587	78.1313
JrRDR1b	CiRDR1D	0.24268	1.07342	0.226081	71.5611
JrRDR1b	CiRDR1E	0.154037	0.382656	0.402548	25.5104
JrRDR1b	CiRDR1F	0.134788	0.30049	0.44856	20.0327
JrRDR1b	CiRDR1G	0.0973453	0.15751	0.618024	10.5007
JrRDR1b	CiRDR1H	0.12231	0.217863	0.561408	14.5242
JrRDR1b	CiRDR1I	0.150879	0.302134	0.499378	20.1423
JrRDR1b	CiRDR1J	0.148232	0.303208	0.488879	20.2139
JrRDR1b	CiRDR1K	0.124161	0.310749	0.399553	20.7166
JrRDR1b	JcRDR1C	0	0	0	0
JrRDR1b	JcRDR1G	0	0	0	0
JrRDR1b	JcRDR1D	0	0	0	0
JrRDR1b	JcRDR1A	0	0	0	0
JrRDR1b	JcRDR1B	0.0261438	0.0431044	0.606522	2.87363
JrRDR1b	JcRDR1H	0	0	0	0
JrRDR1b	JcRDR1F	0	0	0	0
JrRDR1b	JcRDR1J	0	0	0	0
JrRDR1b	JcRDR1I	0	0	0	0
JrRDR1b	JcRDR1K	0.804572	0	0	0
JrRDR1b	JcRDR1E	0	0	0	0
JrRDR1b	JhRDR1.8	0	0	0	0
JrRDR1b	JhRDR1.9	0	0	0	0
JrRDR1b	JhRDR1.1	0	0	0	0
JrRDR1b	JhRDR1.10	0	0	0	0
JrRDR1b	JhRDR1.6	0	0	0	0
JrRDR1b	JhRDR1.11	0	0	0	0
JrRDR1b	JhRDR1.7	0	0	0	0
JrRDR1b	JhRDR1.12	0	0	0	0
JrRDR1b	JhRDR1.13	0	0	0	0
JrRDR1b	JhRDR1.14	0	0	0	0
JrRDR1b	JhRDR1.5	0	0	0	0
JrRDR1b	JhRDR1.15	0	0	0	0
JrRDR1b	JhRDR1.3	0	0	0	0
JrRDR1b	JhRDR1.16	0	0	0	0
JrRDR1b	JhRDR1.2	0	0	0	0
JrRDR1b	JhRDR1.17	1.14613	1.30893	0.875625	87.262
JrRDR1b	JhRDR1.18	0	0	0	0
JrRDR1b	JhRDR1.19	0	0	0	0
JrRDR1b	JhRDR1.4	0	0	0	0
JrRDR1b	JhRDR1.20	0	0	0	0
JrRDR1b	JmRDR1.1	0.134441	0.281274	0.477973	18.7516
JrRDR1b	JmRDR1.2	0.190262	0.38344	0.496198	25.5627
JrRDR1b	JmRDR1.3	0.119958	0.342991	0.349741	22.8661
JrRDR1b	JmRDR1.4	0.194959	0.420671	0.463448	28.0447
JrRDR1b	JmRDR1.5	0.352778	1.27669	0.276321	85.113
JrRDR1b	JmRDR1.6	0.0719987	0.189916	0.379107	12.6611
JrRDR1b	JmRDR1.7	0.0885783	0.122443	0.723424	8.16288
JrRDR1b	JmRDR1.8	0.0883143	0.157091	0.562186	10.4727
JrRDR1b	JmRDR1.9	0.0262924	0.0728455	0.360934	4.85637
JrRDR1b	JmRDR1.10	0.086486	0.157565	0.548889	10.5044
JrRDR1b	JmRDR1.11	0.14477	0.348195	0.415771	23.213
JrRDR1b	JmRDR1.12	0.237761	0.461241	0.515481	30.7494
JrRDR1b	JmRDR1.13	0.346324	0.612228	0.565678	40.8152
JrRDR1b	JmRDR1.14	0.197801	0.268312	0.737206	17.8875
JrRDR1b	JmRDR1.15	0.155957	0.367599	0.424258	24.5066
JrRDR1b	JmRDR1.16	0.0749129	0.152365	0.491669	10.1576
JrRDR1b	JmRDR1.17	0.136776	0.30654	0.446193	20.436
JrRDR1b	JmRDR1.18	0.147007	0.356374	0.412507	23.7583
JrRDR1b	JmRDR1.19	0.195064	0.423155	0.460975	28.2104
JrRDR1b	JmRDR1.20	0	0	0	0
JrRDR1b	JmRDR1.21	0.144991	0.313428	0.462597	20.8952
JrRDR1b	JmRDR1.22	0.0921241	0.203337	0.453062	13.5558
JrRDR1b	JmRDR1.23	0.137518	0.308582	0.445645	20.5721
JrRDR1b	JmRDR1.24	0.193841	0.41962	0.461944	27.9747
JrRDR1b	JmRDR1.25	0.133476	0.367553	0.363148	24.5035
JrRDR1b	JmRDR1.26	0.197363	0.420671	0.469164	28.0447
JrRDR1b	JmRDR1.27	0.238496	1.16082	0.205454	77.388
JrRDR1b	JmRDR1.28	0.136912	0.315831	0.433497	21.0554
JrRDR1b	JmRDR1.29	0.148145	0.333087	0.444764	22.2058
JrRDR1b	JmRDR1.30	0.127423	0.309039	0.412321	20.6026
JrRDR1b	JmRDR1.31	0.0272683	0.0712077	0.382941	4.74718
JrRDR1b	JnRDR1.1	0	0	0	0
JrRDR1b	JnRDR1.2	0	0	0	0
JrRDR1b	JnRDR1.3	0.952809	0	0	0
JrRDR1b	JnRDR1.4	0	0	0	0
JrRDR1b	JnRDR1.5	0	0	0	0
JrRDR1b	JnRDR1.6	0.0277568	0.07676	0.361606	5.11733
JrRDR1b	JnRDR1.7	1.14613	1.30893	0.875625	87.262
JrRDR1b	JnRDR1.8	0.846493	1.93163	0.438228	128.775
JrRDR1b	JnRDR1.9	0.169968	0.365123	0.465508	24.3415
JrRDR1b	JnRDR1.10	1.12102	1.08259	1.03549	72.1726
JrRDR1b	JnRDR1.11	0.778491	0	0	0
JrRDR1b	JnRDR1.12	1.06027	0	0	0
JrRDR1b	JnRDR1.13	0	0	0	0
JrRDR1b	JnRDR1.14	0	0	0	0
JrRDR1b	JnRDR1.15	0.768787	0	0	0
JrRDR1b	JnRDR1.16	0	0	0	0
JrRDR1b	JnRDR1.17	0	0	0	0
JrRDR1b	JnRDR1.18	0	0	0	0
JrRDR1b	JnRDR1.19	0.869553	1.42063	0.61209	94.7087
JrRDR1b	JnRDR1.20	0.125815	0.328859	0.38258	21.924
JrRDR1b	JnRDR1.21	0	0	0	0
JrRDR1b	JnRDR1.22	0.773459	1.30893	0.59091	87.262
JrRDR1b	JnRDR1.23	0	0	0	0
JrRDR1b	JnRDR1.24	0	0	0	0
JrRDR1b	JsRDR1.1	0.144647	0.307892	0.469797	20.5261
JrRDR1b	JsRDR1.2	0.0824214	0.118529	0.695369	7.90194
JrRDR1b	JsRDR1.3	0.165606	0.332593	0.497925	22.1729
JrRDR1b	JsRDR1.4	0.244375	1.13872	0.214604	75.9149
JrRDR1b	JsRDR1.5	0.133241	0.356102	0.374166	23.7402
JrRDR1b	JsRDR1.6	0.135129	0.318523	0.424235	21.2349
JrRDR1b	JsRDR1.7	0.0702408	0.1632	0.430397	10.88
JrRDR1b	JsRDR1.8	0.0924695	0.137172	0.674116	9.14477
JrRDR1b	JsRDR1.9	0.137107	0.300536	0.456208	20.0357
JrRDR1b	JsRDR1.10	0.143166	0.30686	0.466553	20.4573
JrRDR1b	JsRDR1.11	0.131574	0.301434	0.436494	20.0956
JrRDR1b	JsRDR1.12	0.00191985	0.00827138	0.232107	0.551425
JrRDR1b	PsRDR1.5	0.0984666	0.178298	0.552258	11.8865
JrRDR1b	PsRDR1.6	0.0902314	0.136398	0.66153	9.0932
JrRDR1b	PsRDR1.7	0.0697456	0.139208	0.501016	9.28057
JrRDR1b	PsRDR1.22	0.130611	0.314338	0.415512	20.9558
JrRDR1b	PsRDR1.23	0.12953	0.24328	0.53243	16.2187
JrRDR1b	PsRDR1.24	0.14122	0.389966	0.362134	25.9977
JrRDR1b	PsRDR1.13	0.148794	0.34548	0.430688	23.032
JrRDR1b	PsRDR1.28	0.253109	1.19632	0.211572	79.7549
JrRDR1b	PsRDR1.1	0.0399831	0.0667487	0.59901	4.44991
JrRDR1b	PsRDR1.2	0.0356785	0.0605528	0.589214	4.03686
JrRDR1b	PsRDR1.25	0.142948	0.308276	0.463701	20.5517
JrRDR1b	PsRDR1.29	0.253047	1.2183	0.207705	81.2199
JrRDR1b	PsRDR1.30	0.249072	1.19762	0.207972	79.8417
JrRDR1b	PsRDR1.8	0.0973468	0.143095	0.680294	9.53967
JrRDR1b	PsRDR1.9	0.09983	0.169494	0.58899	11.2996
JrRDR1b	PsRDR1.26	0.137356	0.321731	0.426929	21.4487
JrRDR1b	PsRDR1.27	0.138339	0.31447	0.439911	20.9647
JrRDR1b	PsRDR1.12	0.0892879	0.147723	0.60443	9.84817
JrRDR1b	PsRDR1.14	0.128208	0.277247	0.462435	18.4831
JrRDR1b	PsRDR1.15	0.140762	0.313699	0.448717	20.9133
JrRDR1b	PsRDR1.16	0.14106	0.292903	0.481591	19.5269
JrRDR1b	PsRDR1.3	0.0361857	0.0605356	0.597759	4.03571
JrRDR1b	PsRDR1.4	0.0582048	0.091634	0.635188	6.10893
JrRDR1b	PsRDR1.17	0.162538	0.341047	0.476584	22.7365
JrRDR1b	PsRDR1.18	0.139227	0.304487	0.45725	20.2991
JrRDR1b	PsRDR1.19	0.141382	0.332523	0.425178	22.1682
JrRDR1b	PsRDR1.20	0.177665	0.325322	0.54612	21.6881
JrRDR1b	PsRDR1.21	0.120224	0.289914	0.414691	19.3276
JrRDR1b	PsRDR1.10	0.0989691	0.183263	0.54004	12.2175
JrRDR1b	PsRDR1.11	0.0863516	0.134664	0.641237	8.97762
JrRDR1c	CcRDR1C	0.0932007	0.142183	0.655501	9.47884
JrRDR1c	CcRDR1B	0.0916262	0.19176	0.477817	12.784
JrRDR1c	CcRDR1A	0.0918191	0.189221	0.485247	12.6148
JrRDR1c	CiRDR1A	0.0969051	0.187234	0.517561	12.4823
JrRDR1c	CiRDR1B	0.160291	0.226687	0.707104	15.1125
JrRDR1c	CiRDR1C	0.277607	1.25012	0.222065	83.341
JrRDR1c	CiRDR1D	0.245541	0.939724	0.261291	62.6483
JrRDR1c	CiRDR1E	0.167139	0.362231	0.461416	24.1487
JrRDR1c	CiRDR1F	0.155383	0.300526	0.517037	20.0351
JrRDR1c	CiRDR1G	0.103015	0.128323	0.802778	8.55487
JrRDR1c	CiRDR1H	0.116167	0.165609	0.701449	11.0406
JrRDR1c	CiRDR1I	0.14178	0.303381	0.467333	20.2254
JrRDR1c	CiRDR1J	0.13672	0.275849	0.495631	18.39
JrRDR1c	CiRDR1K	0.127065	0.305028	0.41657	20.3352
JrRDR1c	JcRDR1C	0	0	0	0
JrRDR1c	JcRDR1G	0	0	0	0
JrRDR1c	JcRDR1D	0	0	0	0
JrRDR1c	JcRDR1A	0	0	0	0
JrRDR1c	JcRDR1B	0.0900561	0.138608	0.649717	9.24055
JrRDR1c	JcRDR1H	0	0	0	0
JrRDR1c	JcRDR1F	0	0	0	0
JrRDR1c	JcRDR1J	0	0	0	0
JrRDR1c	JcRDR1I	0	0	0	0
JrRDR1c	JcRDR1K	0	0	0	0
JrRDR1c	JcRDR1E	0	0	0	0
JrRDR1c	JhRDR1.8	0	0	0	0
JrRDR1c	JhRDR1.9	0	0	0	0
JrRDR1c	JhRDR1.1	0	0	0	0
JrRDR1c	JhRDR1.10	0	0	0	0
JrRDR1c	JhRDR1.6	0	0	0	0
JrRDR1c	JhRDR1.11	0	0	0	0
JrRDR1c	JhRDR1.7	0	0	0	0
JrRDR1c	JhRDR1.12	0	0	0	0
JrRDR1c	JhRDR1.13	0	0	0	0
JrRDR1c	JhRDR1.14	0	0	0	0
JrRDR1c	JhRDR1.5	0	0	0	0
JrRDR1c	JhRDR1.15	0	0	0	0
JrRDR1c	JhRDR1.3	0	0	0	0
JrRDR1c	JhRDR1.16	0	0	0	0
JrRDR1c	JhRDR1.2	0	0	0	0
JrRDR1c	JhRDR1.17	1.00385	1.94892	0.515078	129.928
JrRDR1c	JhRDR1.18	0	0	0	0
JrRDR1c	JhRDR1.19	0	0	0	0
JrRDR1c	JhRDR1.4	0	0	0	0
JrRDR1c	JhRDR1.20	0	0	0	0
JrRDR1c	JmRDR1.1	0.15203	0.258533	0.588047	17.2356
JrRDR1c	JmRDR1.2	0.164534	0.383015	0.429577	25.5343
JrRDR1c	JmRDR1.3	0.150343	0.307417	0.489051	20.4945
JrRDR1c	JmRDR1.4	0.167772	0.297296	0.564328	19.8197
JrRDR1c	JmRDR1.5	0.396076	2.24787	0.176201	149.858
JrRDR1c	JmRDR1.6	0.021146	0.0346336	0.610563	2.30891
JrRDR1c	JmRDR1.7	0.0297187	0.0757846	0.392147	5.05231
JrRDR1c	JmRDR1.8	0.0602237	0.0779196	0.772895	5.19464
JrRDR1c	JmRDR1.9	0.0816812	0.166414	0.490832	11.0942
JrRDR1c	JmRDR1.10	0.0582744	0.0761894	0.764863	5.07929
JrRDR1c	JmRDR1.11	0.140305	0.339516	0.41325	22.6344
JrRDR1c	JmRDR1.12	0.217301	0.392292	0.553928	26.1528
JrRDR1c	JmRDR1.13	0.338876	0.547233	0.619253	36.4822
JrRDR1c	JmRDR1.14	0.195394	0.246142	0.793825	16.4095
JrRDR1c	JmRDR1.15	0.168048	0.370971	0.452994	24.7314
JrRDR1c	JmRDR1.16	0.0590893	0.0566512	1.04304	3.77675
JrRDR1c	JmRDR1.17	0.153881	0.292143	0.526733	19.4762
JrRDR1c	JmRDR1.18	0.140449	0.37884	0.370733	25.256
JrRDR1c	JmRDR1.19	0.174453	0.337543	0.516832	22.5029
JrRDR1c	JmRDR1.20	0	0	0	0
JrRDR1c	JmRDR1.21	0.148673	0.307965	0.482759	20.531
JrRDR1c	JmRDR1.22	0.0624196	0.0711594	0.87718	4.74396
JrRDR1c	JmRDR1.23	0.135369	0.278958	0.485268	18.5972
JrRDR1c	JmRDR1.24	0.182423	0.322544	0.565575	21.5029
JrRDR1c	JmRDR1.25	0.166708	0.345445	0.48259	23.0296
JrRDR1c	JmRDR1.26	0.170039	0.297296	0.571951	19.8197
JrRDR1c	JmRDR1.27	0.251767	1.17926	0.213496	78.6174
JrRDR1c	JmRDR1.28	0.127011	0.2891	0.439332	19.2733
JrRDR1c	JmRDR1.29	0.144044	0.299673	0.480671	19.9782
JrRDR1c	JmRDR1.30	0.137347	0.307243	0.447031	20.4828
JrRDR1c	JmRDR1.31	0.082611	0.166743	0.49544	11.1162
JrRDR1c	JnRDR1.1	0	0	0	0
JrRDR1c	JnRDR1.2	0	0	0	0
JrRDR1c	JnRDR1.3	0	0	0	0
JrRDR1c	JnRDR1.4	0	0	0	0
JrRDR1c	JnRDR1.5	0	0	0	0
JrRDR1c	JnRDR1.6	0.0821019	0.163131	0.503287	10.8754
JrRDR1c	JnRDR1.7	0	0	0	0
JrRDR1c	JnRDR1.8	0	0	0	0
JrRDR1c	JnRDR1.9	0.170929	0.344477	0.496199	22.9651
JrRDR1c	JnRDR1.10	0.96108	0	0	0
JrRDR1c	JnRDR1.11	0.944216	0	0	0
JrRDR1c	JnRDR1.12	0	0	0	0
JrRDR1c	JnRDR1.13	1.13444	2.20833	0.51371	147.222
JrRDR1c	JnRDR1.14	0.829714	0	0	0
JrRDR1c	JnRDR1.15	0	0	0	0
JrRDR1c	JnRDR1.16	0	0	0	0
JrRDR1c	JnRDR1.17	0	0	0	0
JrRDR1c	JnRDR1.18	0	0	0	0
JrRDR1c	JnRDR1.19	0	0	0	0
JrRDR1c	JnRDR1.20	0.125917	0.287478	0.438005	19.1652
JrRDR1c	JnRDR1.21	0	0	0	0
JrRDR1c	JnRDR1.22	1.12395	0	0	0
JrRDR1c	JnRDR1.23	0	0	0	0
JrRDR1c	JnRDR1.24	0.716634	3.03229	0.236334	202.153
JrRDR1c	JsRDR1.1	0.137576	0.295511	0.465551	19.7007
JrRDR1c	JsRDR1.2	0.0542622	0.0706185	0.768385	4.7079
JrRDR1c	JsRDR1.3	0.120218	0.1766	0.680736	11.7734
JrRDR1c	JsRDR1.4	0.251434	1.14515	0.219564	76.3432
JrRDR1c	JsRDR1.5	0.131146	0.296066	0.442962	19.7377
JrRDR1c	JsRDR1.6	0.136325	0.288067	0.473239	19.2045
JrRDR1c	JsRDR1.7	0.0514914	0.070438	0.731017	4.69587
JrRDR1c	JsRDR1.8	0.063716	0.0639858	0.995784	4.26572
JrRDR1c	JsRDR1.9	0.13953	0.310096	0.449955	20.6731
JrRDR1c	JsRDR1.10	0.134784	0.286521	0.470415	19.1014
JrRDR1c	JsRDR1.11	0.132193	0.300534	0.439859	20.0356
JrRDR1c	JsRDR1.12	0.0833544	0.133197	0.625796	8.87982
JrRDR1c	PsRDR1.5	0.0733206	0.0908007	0.80749	6.05338
JrRDR1c	PsRDR1.6	0.065818	0.0725273	0.907493	4.83515
JrRDR1c	PsRDR1.7	0.0606391	0.061313	0.989009	4.08753
JrRDR1c	PsRDR1.22	0.1334	0.293115	0.455112	19.541
JrRDR1c	PsRDR1.23	0.140897	0.226857	0.621083	15.1238
JrRDR1c	PsRDR1.24	0.134223	0.34657	0.387288	23.1047
JrRDR1c	PsRDR1.13	0	0	0	0
JrRDR1c	PsRDR1.28	0.266661	1.24779	0.213707	83.1862
JrRDR1c	PsRDR1.1	0.0923	0.154723	0.596552	10.3148
JrRDR1c	PsRDR1.2	0.117736	0.193612	0.608102	12.9074
JrRDR1c	PsRDR1.25	0.145992	0.274973	0.530931	18.3316
JrRDR1c	PsRDR1.29	0.25715	1.22168	0.210489	81.4455
JrRDR1c	PsRDR1.30	0.292395	1.26413	0.231302	84.2751
JrRDR1c	PsRDR1.8	0.0623479	0.0672962	0.92647	4.48641
JrRDR1c	PsRDR1.9	0.0635485	0.0793962	0.800398	5.29308
JrRDR1c	PsRDR1.26	0.13438	0.278992	0.481661	18.5995
JrRDR1c	PsRDR1.27	0.139594	0.285214	0.489436	19.0143
JrRDR1c	PsRDR1.12	0.0559763	0.0646323	0.866073	4.30882
JrRDR1c	PsRDR1.14	0.127691	0.262793	0.485901	17.5195
JrRDR1c	PsRDR1.15	0.135103	0.293996	0.459542	19.5997
JrRDR1c	PsRDR1.16	0.146659	0.276608	0.530204	18.4406
JrRDR1c	PsRDR1.3	0.0878866	0.14931	0.588618	9.95401
JrRDR1c	PsRDR1.4	0.130491	0.143772	0.907623	9.5848
JrRDR1c	PsRDR1.17	0.149711	0.324137	0.461875	21.6092
JrRDR1c	PsRDR1.18	0.145832	0.313776	0.464763	20.9184
JrRDR1c	PsRDR1.19	0.142739	0.32943	0.433292	21.962
JrRDR1c	PsRDR1.20	0.149206	0.348681	0.427915	23.2454
JrRDR1c	PsRDR1.21	0.128685	0.269005	0.478373	17.9337
JrRDR1c	PsRDR1.10	0.0677663	0.074949	0.904165	4.9966
JrRDR1c	PsRDR1.11	0.0535068	0.0699264	0.765188	4.66176
JrRDR1d	CcRDR1C	0.0985587	0.155696	0.633021	10.3797
JrRDR1d	CcRDR1B	0.0955222	0.174956	0.545978	11.6637
JrRDR1d	CcRDR1A	0.112413	0.18513	0.607211	12.342
JrRDR1d	CiRDR1A	0.106681	0.171619	0.621611	11.4413
JrRDR1d	CiRDR1B	0.17129	0.229834	0.745276	15.3223
JrRDR1d	CiRDR1C	0.270581	1.1889	0.227589	79.2601
JrRDR1d	CiRDR1D	0.262032	0.908665	0.28837	60.5776
JrRDR1d	CiRDR1E	0.196033	0.337494	0.580849	22.4996
JrRDR1d	CiRDR1F	0.167404	0.247885	0.675332	16.5256
JrRDR1d	CiRDR1G	0.113093	0.140582	0.804462	9.37214
JrRDR1d	CiRDR1H	0.121963	0.179877	0.678037	11.9918
JrRDR1d	CiRDR1I	0.141884	0.307265	0.461766	20.4843
JrRDR1d	CiRDR1J	0.139056	0.271159	0.512819	18.0773
JrRDR1d	CiRDR1K	0.133874	0.292663	0.457433	19.5109
JrRDR1d	JcRDR1C	0	0	0	0
JrRDR1d	JcRDR1G	0	0	0	0
JrRDR1d	JcRDR1D	0	0	0	0
JrRDR1d	JcRDR1A	0	0	0	0
JrRDR1d	JcRDR1B	0.0994239	0.141536	0.702461	9.43576
JrRDR1d	JcRDR1H	0	0	0	0
JrRDR1d	JcRDR1F	0	0	0	0
JrRDR1d	JcRDR1J	0	0	0	0
JrRDR1d	JcRDR1I	0	0	0	0
JrRDR1d	JcRDR1K	0.450788	1.30612	0.345134	87.0749
JrRDR1d	JcRDR1E	0	0	0	0
JrRDR1d	JhRDR1.8	0	0	0	0
JrRDR1d	JhRDR1.9	0	0	0	0
JrRDR1d	JhRDR1.1	0	0	0	0
JrRDR1d	JhRDR1.10	0	0	0	0
JrRDR1d	JhRDR1.6	0	0	0	0
JrRDR1d	JhRDR1.11	0	0	0	0
JrRDR1d	JhRDR1.7	0	0	0	0
JrRDR1d	JhRDR1.12	0	0	0	0
JrRDR1d	JhRDR1.13	0	0	0	0
JrRDR1d	JhRDR1.14	0	0	0	0
JrRDR1d	JhRDR1.5	0	0	0	0
JrRDR1d	JhRDR1.15	0	0	0	0
JrRDR1d	JhRDR1.3	0	0	0	0
JrRDR1d	JhRDR1.16	0	0	0	0
JrRDR1d	JhRDR1.2	0	0	0	0
JrRDR1d	JhRDR1.17	0	0	0	0
JrRDR1d	JhRDR1.18	0	0	0	0
JrRDR1d	JhRDR1.19	0	0	0	0
JrRDR1d	JhRDR1.4	0	0	0	0
JrRDR1d	JhRDR1.20	0	0	0	0
JrRDR1d	JmRDR1.1	0.158204	0.221845	0.713132	14.7896
JrRDR1d	JmRDR1.2	0.154474	0.361111	0.427773	24.0741
JrRDR1d	JmRDR1.3	0.155553	0.305037	0.509949	20.3358
JrRDR1d	JmRDR1.4	0.142644	0.269531	0.529232	17.9687
JrRDR1d	JmRDR1.5	0.282461	1.33355	0.211812	88.903
JrRDR1d	JmRDR1.6	0.0686497	0.0879968	0.780139	5.86645
JrRDR1d	JmRDR1.7	0.0704257	0.109376	0.643887	7.29173
JrRDR1d	JmRDR1.8	0.0574245	0.0800582	0.717284	5.33721
JrRDR1d	JmRDR1.9	0.0918196	0.153718	0.597326	10.2479
JrRDR1d	JmRDR1.10	0.0550609	0.078449	0.701869	5.22993
JrRDR1d	JmRDR1.11	0.1675	0.305455	0.548361	20.3637
JrRDR1d	JmRDR1.12	0.199585	0.403772	0.494302	26.9181
JrRDR1d	JmRDR1.13	0.285147	0.517067	0.551469	34.4711
JrRDR1d	JmRDR1.14	0.201369	0.219866	0.915874	14.6577
JrRDR1d	JmRDR1.15	0.193688	0.380178	0.509466	25.3452
JrRDR1d	JmRDR1.16	0.0857957	0.0725059	1.18329	4.83373
JrRDR1d	JmRDR1.17	0.154228	0.282402	0.54613	18.8268
JrRDR1d	JmRDR1.18	0.176416	0.348965	0.505541	23.2644
JrRDR1d	JmRDR1.19	0.126068	0.289744	0.435101	19.3163
JrRDR1d	JmRDR1.20	0	0	0	0
JrRDR1d	JmRDR1.21	0.151574	0.300865	0.503794	20.0577
JrRDR1d	JmRDR1.22	0.0792837	0.0860347	0.921532	5.73564
JrRDR1d	JmRDR1.23	0.13641	0.255733	0.53341	17.0489
JrRDR1d	JmRDR1.24	0.177907	0.300107	0.592812	20.0071
JrRDR1d	JmRDR1.25	0.159419	0.309775	0.514628	20.6517
JrRDR1d	JmRDR1.26	0.145029	0.269531	0.538078	17.9687
JrRDR1d	JmRDR1.27	0.239104	1.15472	0.207066	76.9815
JrRDR1d	JmRDR1.28	0.137559	0.286688	0.479821	19.1125
JrRDR1d	JmRDR1.29	0.153932	0.285816	0.538571	19.0544
JrRDR1d	JmRDR1.30	0.140817	0.299203	0.470642	19.9468
JrRDR1d	JmRDR1.31	0.092778	0.154002	0.602448	10.2668
JrRDR1d	JnRDR1.1	0	0	0	0
JrRDR1d	JnRDR1.2	0	0	0	0
JrRDR1d	JnRDR1.3	0	0	0	0
JrRDR1d	JnRDR1.4	0	0	0	0
JrRDR1d	JnRDR1.5	0	0	0	0
JrRDR1d	JnRDR1.6	0.0927487	0.154177	0.601574	10.2785
JrRDR1d	JnRDR1.7	0	0	0	0
JrRDR1d	JnRDR1.8	0	0	0	0
JrRDR1d	JnRDR1.9	0.172203	0.323318	0.532612	21.5545
JrRDR1d	JnRDR1.10	0	0	0	0
JrRDR1d	JnRDR1.11	0.736101	0	0	0
JrRDR1d	JnRDR1.12	0	0	0	0
JrRDR1d	JnRDR1.13	0	0	0	0
JrRDR1d	JnRDR1.14	0.837763	0	0	0
JrRDR1d	JnRDR1.15	0	0	0	0
JrRDR1d	JnRDR1.16	0	0	0	0
JrRDR1d	JnRDR1.17	0.565656	3.21784	0.175787	214.523
JrRDR1d	JnRDR1.18	0	0	0	0
JrRDR1d	JnRDR1.19	0	0	0	0
JrRDR1d	JnRDR1.20	0.132244	0.268023	0.493405	17.8682
JrRDR1d	JnRDR1.21	0	0	0	0
JrRDR1d	JnRDR1.22	0	0	0	0
JrRDR1d	JnRDR1.23	0	0	0	0
JrRDR1d	JnRDR1.24	0	0	0	0
JrRDR1d	JsRDR1.1	0.146897	0.293471	0.500551	19.5647
JrRDR1d	JsRDR1.2	0.0484795	0.0477956	1.01431	3.18638
JrRDR1d	JsRDR1.3	0.122753	0.224402	0.547023	14.9601
JrRDR1d	JsRDR1.4	0.242892	1.14279	0.212542	76.1863
JrRDR1d	JsRDR1.5	0.136049	0.287366	0.473436	19.1577
JrRDR1d	JsRDR1.6	0.134121	0.251943	0.532348	16.7962
JrRDR1d	JsRDR1.7	0.0622889	0.0744151	0.837047	4.961
JrRDR1d	JsRDR1.8	0.0312393	0.0320403	0.975	2.13602
JrRDR1d	JsRDR1.9	0.149186	0.301866	0.494214	20.1244
JrRDR1d	JsRDR1.10	0.148158	0.276243	0.536331	18.4162
JrRDR1d	JsRDR1.11	0.13718	0.283631	0.483658	18.9087
JrRDR1d	JsRDR1.12	0.0977207	0.137942	0.708416	9.19616
JrRDR1d	PsRDR1.5	0.0743429	0.095197	0.780938	6.34647
JrRDR1d	PsRDR1.6	0.0842127	0.070503	1.19446	4.7002
JrRDR1d	PsRDR1.7	0.0805104	0.0874665	0.92047	5.8311
JrRDR1d	PsRDR1.22	0.13486	0.257668	0.523388	17.1779
JrRDR1d	PsRDR1.23	0.149685	0.195467	0.76578	13.0311
JrRDR1d	PsRDR1.24	0.129517	0.320172	0.404525	21.3448
JrRDR1d	PsRDR1.13	0.148106	0.28953	0.51154	19.302
JrRDR1d	PsRDR1.28	0.250992	1.20996	0.207438	80.664
JrRDR1d	PsRDR1.1	0.0998738	0.139752	0.71465	9.31681
JrRDR1d	PsRDR1.2	0.129004	0.185908	0.693914	12.3939
JrRDR1d	PsRDR1.25	0.145873	0.242729	0.600971	16.1819
JrRDR1d	PsRDR1.29	0.249005	1.22541	0.203201	81.6943
JrRDR1d	PsRDR1.30	0.249684	1.24579	0.200422	83.0529
JrRDR1d	PsRDR1.8	0.0817462	0.0667588	1.2245	4.45059
JrRDR1d	PsRDR1.9	0.0726327	0.0802368	0.90523	5.34912
JrRDR1d	PsRDR1.26	0.132449	0.250684	0.528349	16.7123
JrRDR1d	PsRDR1.27	0.141384	0.25091	0.563486	16.7273
JrRDR1d	PsRDR1.12	0.0646125	0.0639862	1.00979	4.26574
JrRDR1d	PsRDR1.14	0.140566	0.259568	0.541537	17.3045
JrRDR1d	PsRDR1.15	0.150573	0.27339	0.550762	18.226
JrRDR1d	PsRDR1.16	0.14996	0.267105	0.561427	17.807
JrRDR1d	PsRDR1.3	0.0981056	0.138861	0.706501	9.25741
JrRDR1d	PsRDR1.4	0.146112	0.145195	1.00631	9.67967
JrRDR1d	PsRDR1.17	0.161118	0.316226	0.509502	21.0817
JrRDR1d	PsRDR1.18	0.15362	0.301565	0.509411	20.1043
JrRDR1d	PsRDR1.19	0.16498	0.341106	0.483663	22.7404
JrRDR1d	PsRDR1.20	0.149444	0.308604	0.484257	20.5736
JrRDR1d	PsRDR1.21	0.153234	0.260834	0.587474	17.389
JrRDR1d	PsRDR1.10	0.0640723	0.0787436	0.813683	5.24957
JrRDR1d	PsRDR1.11	0.0859025	0.083546	1.02821	5.56973
JrRDR1e	CcRDR1C	0.0788971	0.174202	0.452905	11.6135
JrRDR1e	CcRDR1B	0.0994512	0.257022	0.386936	17.1348
JrRDR1e	CcRDR1A	0.117571	0.268357	0.438114	17.8904
JrRDR1e	CiRDR1A	0.102226	0.252691	0.404549	16.846
JrRDR1e	CiRDR1B	0.904502	0	0	0
JrRDR1e	CiRDR1C	0.972314	2.43378	0.399507	162.252
JrRDR1e	CiRDR1D	0.990924	0	0	0
JrRDR1e	CiRDR1E	0.38764	0.658385	0.588775	43.8923
JrRDR1e	CiRDR1F	0.886112	0	0	0
JrRDR1e	CiRDR1G	0.13032	0.190988	0.682346	12.7326
JrRDR1e	CiRDR1H	0.205455	0.417467	0.492147	27.8311
JrRDR1e	CiRDR1I	0.138606	0.308874	0.448746	20.5916
JrRDR1e	CiRDR1J	0.136085	0.28785	0.472763	19.19
JrRDR1e	CiRDR1K	0.131445	0.304348	0.431892	20.2899
JrRDR1e	JcRDR1C	0	0	0	0
JrRDR1e	JcRDR1G	0	0	0	0
JrRDR1e	JcRDR1D	0	0	0	0
JrRDR1e	JcRDR1A	0.354478	1.58042	0.224294	105.361
JrRDR1e	JcRDR1B	0.0869432	0.171725	0.506293	11.4483
JrRDR1e	JcRDR1H	0	0	0	0
JrRDR1e	JcRDR1F	0	0	0	0
JrRDR1e	JcRDR1J	0	0	0	0
JrRDR1e	JcRDR1I	0	0	0	0
JrRDR1e	JcRDR1K	0	0	0	0
JrRDR1e	JcRDR1E	0.149816	0.213404	0.702031	14.2269
JrRDR1e	JhRDR1.8	0	0	0	0
JrRDR1e	JhRDR1.9	0	0	0	0
JrRDR1e	JhRDR1.1	0.309873	1.49457	0.207332	99.6381
JrRDR1e	JhRDR1.10	0	0	0	0
JrRDR1e	JhRDR1.6	0	0	0	0
JrRDR1e	JhRDR1.11	0	0	0	0
JrRDR1e	JhRDR1.7	0	0	0	0
JrRDR1e	JhRDR1.12	0	0	0	0
JrRDR1e	JhRDR1.13	0	0	0	0
JrRDR1e	JhRDR1.14	0	0	0	0
JrRDR1e	JhRDR1.5	0	0	0	0
JrRDR1e	JhRDR1.15	0	0	0	0
JrRDR1e	JhRDR1.3	0	0	0	0
JrRDR1e	JhRDR1.16	0	0	0	0
JrRDR1e	JhRDR1.2	0	0	0	0
JrRDR1e	JhRDR1.17	0	0	0	0
JrRDR1e	JhRDR1.18	0	0	0	0
JrRDR1e	JhRDR1.19	0	0	0	0
JrRDR1e	JhRDR1.4	0	0	0	0
JrRDR1e	JhRDR1.20	0	0	0	0
JrRDR1e	JmRDR1.1	0.895654	0	0	0
JrRDR1e	JmRDR1.2	0.175558	0.396002	0.443326	26.4001
JrRDR1e	JmRDR1.3	0.255106	0.53833	0.473884	35.8886
JrRDR1e	JmRDR1.4	0.15206	0.269239	0.564777	17.9493
JrRDR1e	JmRDR1.5	0.334788	1.39957	0.239208	93.3045
JrRDR1e	JmRDR1.6	0.0477196	0.0829175	0.575507	5.52783
JrRDR1e	JmRDR1.7	0.815957	2.55521	0.319331	170.347
JrRDR1e	JmRDR1.8	0.0556584	0.0953094	0.583977	6.35396
JrRDR1e	JmRDR1.9	0.0823331	0.180718	0.455588	12.0479
JrRDR1e	JmRDR1.10	0.0532606	0.0909662	0.585498	6.06442
JrRDR1e	JmRDR1.11	0.109953	0.462982	0.237488	30.8655
JrRDR1e	JmRDR1.12	0.216141	0.42377	0.510043	28.2513
JrRDR1e	JmRDR1.13	0.564151	1.08338	0.520733	72.2253
JrRDR1e	JmRDR1.14	0.197921	0.267707	0.739317	17.8472
JrRDR1e	JmRDR1.15	0.224207	0.500939	0.447573	33.3959
JrRDR1e	JmRDR1.16	0.0838492	0.0761247	1.10147	5.07498
JrRDR1e	JmRDR1.17	0.166512	0.379331	0.438962	25.2888
JrRDR1e	JmRDR1.18	0.11668	0.461049	0.253075	30.7366
JrRDR1e	JmRDR1.19	0.157531	0.317111	0.496768	21.1408
JrRDR1e	JmRDR1.20	0.284186	0.503726	0.564167	33.5817
JrRDR1e	JmRDR1.21	0.144103	0.329245	0.437678	21.9497
JrRDR1e	JmRDR1.22	0.0622082	0.067838	0.917012	4.52253
JrRDR1e	JmRDR1.23	0.142764	0.376297	0.379391	25.0865
JrRDR1e	JmRDR1.24	0.293208	0.571314	0.513217	38.0876
JrRDR1e	JmRDR1.25	0.27716	0.962242	0.288036	64.1495
JrRDR1e	JmRDR1.26	0.154389	0.269239	0.573427	17.9493
JrRDR1e	JmRDR1.27	0.208721	1.36341	0.153087	90.8943
JrRDR1e	JmRDR1.28	0.13919	0.324969	0.428317	21.6646
JrRDR1e	JmRDR1.29	0.161393	0.329734	0.489464	21.9822
JrRDR1e	JmRDR1.30	0.132357	0.296199	0.446849	19.7466
JrRDR1e	JmRDR1.31	0.0835469	0.175785	0.47528	11.719
JrRDR1e	JnRDR1.1	0	0	0	0
JrRDR1e	JnRDR1.2	0.587648	0	0	0
JrRDR1e	JnRDR1.3	0.865065	0	0	0
JrRDR1e	JnRDR1.4	0.756367	0	0	0
JrRDR1e	JnRDR1.5	1.92371	0	0	0
JrRDR1e	JnRDR1.6	0.082309	0.180925	0.454934	12.0617
JrRDR1e	JnRDR1.7	0	0	0	0
JrRDR1e	JnRDR1.8	1.092	1.2215	0.893983	81.4335
JrRDR1e	JnRDR1.9	0.951053	0	0	0
JrRDR1e	JnRDR1.10	1.18809	1.45943	0.814077	97.2955
JrRDR1e	JnRDR1.11	0	0	0	0
JrRDR1e	JnRDR1.12	0	0	0	0
JrRDR1e	JnRDR1.13	0	0	0	0
JrRDR1e	JnRDR1.14	1.42943	0.841005	1.69967	56.067
JrRDR1e	JnRDR1.15	0	0	0	0
JrRDR1e	JnRDR1.16	0	0	0	0
JrRDR1e	JnRDR1.17	0.481652	0	0	0
JrRDR1e	JnRDR1.18	0	0	0	0
JrRDR1e	JnRDR1.19	0.904393	1.71682	0.526784	114.455
JrRDR1e	JnRDR1.20	0.140785	0.454468	0.30978	30.2979
JrRDR1e	JnRDR1.21	0	0	0	0
JrRDR1e	JnRDR1.22	0.735946	0	0	0
JrRDR1e	JnRDR1.23	0.726419	0	0	0
JrRDR1e	JnRDR1.24	0.801401	1.88423	0.42532	125.615
JrRDR1e	JsRDR1.1	0.150667	0.317392	0.474704	21.1594
JrRDR1e	JsRDR1.2	0.95082	3.21937	0.295344	214.624
JrRDR1e	JsRDR1.3	0.0717847	0.140597	0.51057	9.37315
JrRDR1e	JsRDR1.4	0.228916	1.39564	0.164022	93.0424
JrRDR1e	JsRDR1.5	0.141313	0.348651	0.405314	23.2434
JrRDR1e	JsRDR1.6	0.155885	0.321916	0.48424	21.4611
JrRDR1e	JsRDR1.7	0.0598736	0.0926553	0.646197	6.17702
JrRDR1e	JsRDR1.8	0.0461507	0.0598608	0.770966	3.99072
JrRDR1e	JsRDR1.9	0.144186	0.344242	0.418851	22.9494
JrRDR1e	JsRDR1.10	0.145698	0.325865	0.447111	21.7244
JrRDR1e	JsRDR1.11	0.13606	0.326019	0.417337	21.7346
JrRDR1e	JsRDR1.12	0.0897586	0.180994	0.495919	12.0663
JrRDR1e	PsRDR1.5	0.057795	0.0685408	0.843219	4.56939
JrRDR1e	PsRDR1.6	0.0697175	0.0872932	0.798659	5.81954
JrRDR1e	PsRDR1.7	0.0741137	0.101693	0.7288	6.77952
JrRDR1e	PsRDR1.22	0.146763	0.34298	0.427907	22.8653
JrRDR1e	PsRDR1.23	0.992949	5.05981	0.196242	337.321
JrRDR1e	PsRDR1.24	0.134935	0.355645	0.379411	23.7097
JrRDR1e	PsRDR1.13	0.193186	0.464005	0.416345	30.9337
JrRDR1e	PsRDR1.28	0.244489	1.5103	0.161881	100.687
JrRDR1e	PsRDR1.1	0.0965543	0.182993	0.527639	12.1995
JrRDR1e	PsRDR1.2	0.0978391	0.187985	0.520462	12.5323
JrRDR1e	PsRDR1.25	0.242845	0.487716	0.497922	32.5144
JrRDR1e	PsRDR1.29	0.237001	1.57271	0.150696	104.848
JrRDR1e	PsRDR1.30	0.23143	1.50581	0.153692	100.387
JrRDR1e	PsRDR1.8	0.0663384	0.08475	0.782754	5.65
JrRDR1e	PsRDR1.9	0.0626461	0.0903512	0.693362	6.02341
JrRDR1e	PsRDR1.26	0.138204	0.339037	0.407638	22.6025
JrRDR1e	PsRDR1.27	0.14896	0.346848	0.429468	23.1232
JrRDR1e	PsRDR1.12	0.0611943	0.0742393	0.824284	4.94929
JrRDR1e	PsRDR1.14	0.127272	0.248285	0.512603	16.5523
JrRDR1e	PsRDR1.15	0.136469	0.346445	0.393911	23.0963
JrRDR1e	PsRDR1.16	0.127532	0.268026	0.475821	17.8684
JrRDR1e	PsRDR1.3	0.0991069	0.187985	0.527206	12.5323
JrRDR1e	PsRDR1.4	0.825903	1.93557	0.426698	129.038
JrRDR1e	PsRDR1.17	0.141418	0.314523	0.449627	20.9682
JrRDR1e	PsRDR1.18	0.155686	0.346359	0.449492	23.0906
JrRDR1e	PsRDR1.19	0.182191	0.445185	0.409247	29.679
JrRDR1e	PsRDR1.20	0.146093	0.340541	0.429001	22.7027
JrRDR1e	PsRDR1.21	0.138569	0.34211	0.405044	22.8073
JrRDR1e	PsRDR1.10	0.0658748	0.0818014	0.805302	5.45343
JrRDR1e	PsRDR1.11	0.0742558	0.09492	0.782298	6.328
JrRDR1f	CcRDR1C	0.0854567	0.168642	0.506733	11.2428
JrRDR1f	CcRDR1B	0.0922513	0.219073	0.421099	14.6048
JrRDR1f	CcRDR1A	0.103348	0.212852	0.485539	14.1902
JrRDR1f	CiRDR1A	0.0920383	0.204895	0.449197	13.6597
JrRDR1f	CiRDR1B	0.229108	0.389506	0.588202	25.9671
JrRDR1f	CiRDR1C	0.91181	2.27464	0.400859	151.643
JrRDR1f	CiRDR1D	0.277424	0.984952	0.281662	65.6635
JrRDR1f	CiRDR1E	0.230907	0.40722	0.567031	27.148
JrRDR1f	CiRDR1F	0.975105	1.67007	0.583869	111.338
JrRDR1f	CiRDR1G	0.111334	0.140247	0.793845	9.34978
JrRDR1f	CiRDR1H	0.14908	0.229456	0.649711	15.2971
JrRDR1f	CiRDR1I	0.14752	0.301524	0.489248	20.1016
JrRDR1f	CiRDR1J	0.140599	0.269652	0.521408	17.9768
JrRDR1f	CiRDR1K	0.131507	0.273699	0.48048	18.2466
JrRDR1f	JcRDR1C	0	0	0	0
JrRDR1f	JcRDR1G	0	0	0	0
JrRDR1f	JcRDR1D	0	0	0	0
JrRDR1f	JcRDR1A	0	0	0	0
JrRDR1f	JcRDR1B	0.0865982	0.149262	0.580175	9.9508
JrRDR1f	JcRDR1H	0	0	0	0
JrRDR1f	JcRDR1F	0	0	0	0
JrRDR1f	JcRDR1J	0	0	0	0
JrRDR1f	JcRDR1I	0	0	0	0
JrRDR1f	JcRDR1K	0	0	0	0
JrRDR1f	JcRDR1E	0	0	0	0
JrRDR1f	JhRDR1.8	0	0	0	0
JrRDR1f	JhRDR1.9	0	0	0	0
JrRDR1f	JhRDR1.1	0	0	0	0
JrRDR1f	JhRDR1.10	0	0	0	0
JrRDR1f	JhRDR1.6	0	0	0	0
JrRDR1f	JhRDR1.11	0	0	0	0
JrRDR1f	JhRDR1.7	0	0	0	0
JrRDR1f	JhRDR1.12	0	0	0	0
JrRDR1f	JhRDR1.13	0	0	0	0
JrRDR1f	JhRDR1.14	0	0	0	0
JrRDR1f	JhRDR1.5	0	0	0	0
JrRDR1f	JhRDR1.15	0	0	0	0
JrRDR1f	JhRDR1.3	0	0	0	0
JrRDR1f	JhRDR1.16	0	0	0	0
JrRDR1f	JhRDR1.2	0	0	0	0
JrRDR1f	JhRDR1.17	0	0	0	0
JrRDR1f	JhRDR1.18	0	0	0	0
JrRDR1f	JhRDR1.19	0	0	0	0
JrRDR1f	JhRDR1.4	0	0	0	0
JrRDR1f	JhRDR1.20	0	0	0	0
JrRDR1f	JmRDR1.1	0.0901778	0.146808	0.614255	9.78723
JrRDR1f	JmRDR1.2	0.175659	0.37141	0.472951	24.7607
JrRDR1f	JmRDR1.3	0.123933	0.311519	0.397835	20.7679
JrRDR1f	JmRDR1.4	0.15206	0.269239	0.564777	17.9493
JrRDR1f	JmRDR1.5	0.334788	1.39957	0.239208	93.3045
JrRDR1f	JmRDR1.6	0.0543727	0.0753886	0.721232	5.0259
JrRDR1f	JmRDR1.7	0.0834555	0.123627	0.675058	8.24181
JrRDR1f	JmRDR1.8	0.0583479	0.0819362	0.712114	5.46241
JrRDR1f	JmRDR1.9	0.0803479	0.173978	0.461827	11.5986
JrRDR1f	JmRDR1.10	0.0575786	0.0821282	0.701082	5.47521
JrRDR1f	JmRDR1.11	0.158201	0.29941	0.528375	19.9606
JrRDR1f	JmRDR1.12	0.216141	0.42377	0.510043	28.2513
JrRDR1f	JmRDR1.13	0.266253	0.487097	0.546611	32.4732
JrRDR1f	JmRDR1.14	0.197921	0.267707	0.739317	17.8472
JrRDR1f	JmRDR1.15	0.184214	0.336623	0.547242	22.4415
JrRDR1f	JmRDR1.16	0.0732216	0.0701396	1.04394	4.67597
JrRDR1f	JmRDR1.17	0.154864	0.319931	0.484055	21.3287
JrRDR1f	JmRDR1.18	0.160507	0.325602	0.492954	21.7068
JrRDR1f	JmRDR1.19	0.157531	0.317111	0.496768	21.1408
JrRDR1f	JmRDR1.20	0	0	0	0
JrRDR1f	JmRDR1.21	0.14712	0.283305	0.5193	18.887
JrRDR1f	JmRDR1.22	0.0663466	0.0679607	0.97625	4.53071
JrRDR1f	JmRDR1.23	0.134042	0.303504	0.441649	20.2336
JrRDR1f	JmRDR1.24	0.41715	0.652717	0.639098	43.5144
JrRDR1f	JmRDR1.25	0.144178	0.334059	0.431595	22.2706
JrRDR1f	JmRDR1.26	0.154389	0.269239	0.573427	17.9493
JrRDR1f	JmRDR1.27	0.236375	1.24416	0.189987	82.9441
JrRDR1f	JmRDR1.28	0.138539	0.290342	0.477156	19.3562
JrRDR1f	JmRDR1.29	0.154046	0.284766	0.540957	18.9844
JrRDR1f	JmRDR1.30	0.137047	0.259062	0.529013	17.2708
JrRDR1f	JmRDR1.31	0.0818171	0.174374	0.469204	11.6249
JrRDR1f	JnRDR1.1	0	0	0	0
JrRDR1f	JnRDR1.2	0.587648	0	0	0
JrRDR1f	JnRDR1.3	0.90176	1.59102	0.566781	106.068
JrRDR1f	JnRDR1.4	0.756367	0	0	0
JrRDR1f	JnRDR1.5	0.697935	0	0	0
JrRDR1f	JnRDR1.6	0.0810338	0.171516	0.472457	11.4344
JrRDR1f	JnRDR1.7	0	0	0	0
JrRDR1f	JnRDR1.8	0	0	0	0
JrRDR1f	JnRDR1.9	0.228177	0.303204	0.752552	20.2136
JrRDR1f	JnRDR1.10	1.18809	1.45943	0.814077	97.2955
JrRDR1f	JnRDR1.11	2.01164	3.88211	0.518182	258.807
JrRDR1f	JnRDR1.12	0	0	0	0
JrRDR1f	JnRDR1.13	0	0	0	0
JrRDR1f	JnRDR1.14	0	0	0	0
JrRDR1f	JnRDR1.15	0	0	0	0
JrRDR1f	JnRDR1.16	0	0	0	0
JrRDR1f	JnRDR1.17	0.481652	0	0	0
JrRDR1f	JnRDR1.18	0	0	0	0
JrRDR1f	JnRDR1.19	0	0	0	0
JrRDR1f	JnRDR1.20	0.129263	0.332875	0.388323	22.1916
JrRDR1f	JnRDR1.21	0	0	0	0
JrRDR1f	JnRDR1.22	0	0	0	0
JrRDR1f	JnRDR1.23	0	0	0	0
JrRDR1f	JnRDR1.24	0.801401	1.88423	0.42532	125.615
JrRDR1f	JsRDR1.1	0.151452	0.265038	0.571436	17.6692
JrRDR1f	JsRDR1.2	0.0223397	0.0336619	0.663648	2.24413
JrRDR1f	JsRDR1.3	0.0218164	0.0297895	0.732352	1.98596
JrRDR1f	JsRDR1.4	0.223094	1.20022	0.185878	80.0145
JrRDR1f	JsRDR1.5	0.126012	0.296485	0.42502	19.7656
JrRDR1f	JsRDR1.6	0.13897	0.287335	0.483651	19.1556
JrRDR1f	JsRDR1.7	0.0551084	0.0823225	0.669421	5.48817
JrRDR1f	JsRDR1.8	0.0579638	0.0520183	1.1143	3.46789
JrRDR1f	JsRDR1.9	0.146961	0.269281	0.545754	17.952
JrRDR1f	JsRDR1.10	0.148207	0.273859	0.54118	18.2573
JrRDR1f	JsRDR1.11	0.137099	0.274631	0.499212	18.3087
JrRDR1f	JsRDR1.12	0.0799497	0.157521	0.50755	10.5014
JrRDR1f	PsRDR1.5	0.18829	0.255458	0.737069	17.0305
JrRDR1f	PsRDR1.6	0.0609174	0.0677233	0.899505	4.51488
JrRDR1f	PsRDR1.7	0.0672894	0.081105	0.829659	5.407
JrRDR1f	PsRDR1.22	0.135488	0.286945	0.472176	19.1296
JrRDR1f	PsRDR1.23	0.10292	0.171085	0.601575	11.4057
JrRDR1f	PsRDR1.24	0.14057	0.342105	0.410897	22.807
JrRDR1f	PsRDR1.13	0.136005	0.327324	0.415505	21.8216
JrRDR1f	PsRDR1.28	0.237698	1.26637	0.1877	84.4248
JrRDR1f	PsRDR1.1	0.0905147	0.163602	0.553262	10.9068
JrRDR1f	PsRDR1.2	0.0882147	0.166568	0.529603	11.1045
JrRDR1f	PsRDR1.25	0.145875	0.279942	0.521089	18.6628
JrRDR1f	PsRDR1.29	0.234098	1.29075	0.181366	86.0498
JrRDR1f	PsRDR1.30	0.225822	1.26401	0.178655	84.2676
JrRDR1f	PsRDR1.8	0.0647312	0.0717627	0.902017	4.78418
JrRDR1f	PsRDR1.9	0.0639579	0.0832537	0.768229	5.55025
JrRDR1f	PsRDR1.26	0.132004	0.28063	0.470384	18.7087
JrRDR1f	PsRDR1.27	0.141069	0.28775	0.490247	19.1833
JrRDR1f	PsRDR1.12	0.0595418	0.0643116	0.925833	4.28744
JrRDR1f	PsRDR1.14	0.134712	0.224629	0.59971	14.9753
JrRDR1f	PsRDR1.15	0.139759	0.285424	0.489653	19.0283
JrRDR1f	PsRDR1.16	0.146066	0.233133	0.626536	15.5422
JrRDR1f	PsRDR1.3	0.0897617	0.166493	0.539133	11.0995
JrRDR1f	PsRDR1.4	0.852249	0	0	0
JrRDR1f	PsRDR1.17	0.161356	0.29744	0.542483	19.8293
JrRDR1f	PsRDR1.18	0.148505	0.278783	0.532692	18.5855
JrRDR1f	PsRDR1.19	0.175415	0.365583	0.479821	24.3722
JrRDR1f	PsRDR1.20	0.146093	0.340541	0.429001	22.7027
JrRDR1f	PsRDR1.21	0.135071	0.226711	0.595785	15.114
JrRDR1f	PsRDR1.10	0.0635974	0.0713589	0.891233	4.75726
JrRDR1f	PsRDR1.11	0.101328	0.115957	0.873836	7.7305
JrRDR1g	CcRDR1C	0.141161	0.337845	0.417828	22.523
JrRDR1g	CcRDR1B	0.145998	0.363662	0.401467	24.2442
JrRDR1g	CcRDR1A	0.15999	0.378147	0.423091	25.2098
JrRDR1g	CiRDR1A	0.146422	0.371601	0.394031	24.7734
JrRDR1g	CiRDR1B	0.205978	0.41669	0.494319	27.7794
JrRDR1g	CiRDR1C	0.305517	1.75424	0.174159	116.95
JrRDR1g	CiRDR1D	0.266066	0.874603	0.304214	58.3069
JrRDR1g	CiRDR1E	0.0735938	0.192111	0.383079	12.8074
JrRDR1g	CiRDR1F	0.0460368	0.154631	0.29772	10.3087
JrRDR1g	CiRDR1G	0.134943	0.319935	0.421784	21.329
JrRDR1g	CiRDR1H	0.146827	0.379715	0.386677	25.3144
JrRDR1g	CiRDR1I	0.153844	0.34091	0.451275	22.7273
JrRDR1g	CiRDR1J	0.125655	0.318383	0.394667	21.2255
JrRDR1g	CiRDR1K	0.122365	0.313072	0.390853	20.8715
JrRDR1g	JcRDR1C	0	0	0	0
JrRDR1g	JcRDR1G	0	0	0	0
JrRDR1g	JcRDR1D	0	0	0	0
JrRDR1g	JcRDR1A	0	0	0	0
JrRDR1g	JcRDR1B	0.141898	0.354671	0.400083	23.6448
JrRDR1g	JcRDR1H	0	0	0	0
JrRDR1g	JcRDR1F	0	0	0	0
JrRDR1g	JcRDR1J	0	0	0	0
JrRDR1g	JcRDR1I	0	0	0	0
JrRDR1g	JcRDR1K	0	0	0	0
JrRDR1g	JcRDR1E	0	0	0	0
JrRDR1g	JhRDR1.8	0	0	0	0
JrRDR1g	JhRDR1.9	0	0	0	0
JrRDR1g	JhRDR1.1	0	0	0	0
JrRDR1g	JhRDR1.10	0	0	0	0
JrRDR1g	JhRDR1.6	0	0	0	0
JrRDR1g	JhRDR1.11	0	0	0	0
JrRDR1g	JhRDR1.7	0	0	0	0
JrRDR1g	JhRDR1.12	0.0951224	0.246225	0.386323	16.415
JrRDR1g	JhRDR1.13	0	0	0	0
JrRDR1g	JhRDR1.14	0	0	0	0
JrRDR1g	JhRDR1.5	0	0	0	0
JrRDR1g	JhRDR1.15	0	0	0	0
JrRDR1g	JhRDR1.3	0	0	0	0
JrRDR1g	JhRDR1.16	0	0	0	0
JrRDR1g	JhRDR1.2	0	0	0	0
JrRDR1g	JhRDR1.17	0.729649	1.15045	0.634231	76.6965
JrRDR1g	JhRDR1.18	0	0	0	0
JrRDR1g	JhRDR1.19	0	0	0	0
JrRDR1g	JhRDR1.4	0	0	0	0
JrRDR1g	JhRDR1.20	0	0	0	0
JrRDR1g	JmRDR1.1	0.0628478	0.144068	0.436237	9.60453
JrRDR1g	JmRDR1.2	0.091827	0.191693	0.479032	12.7795
JrRDR1g	JmRDR1.3	0.0169013	0.0379698	0.445124	2.53132
JrRDR1g	JmRDR1.4	0.0235633	0.040121	0.587307	2.67473
JrRDR1g	JmRDR1.5	0.344428	1.23938	0.277904	82.6252
JrRDR1g	JmRDR1.6	0.121994	0.325079	0.375275	21.6719
JrRDR1g	JmRDR1.7	0.135191	0.302827	0.446429	20.1884
JrRDR1g	JmRDR1.8	0.128981	0.301958	0.427148	20.1305
JrRDR1g	JmRDR1.9	0.134956	0.368737	0.365996	24.5825
JrRDR1g	JmRDR1.10	0.127934	0.304425	0.420248	20.295
JrRDR1g	JmRDR1.11	0.108769	0.273797	0.39726	18.2531
JrRDR1g	JmRDR1.12	0.120908	0.23019	0.525253	15.346
JrRDR1g	JmRDR1.13	0.229055	0.570708	0.401352	38.0472
JrRDR1g	JmRDR1.14	0.186504	0.279193	0.66801	18.6129
JrRDR1g	JmRDR1.15	0.172556	0.399333	0.432111	26.6222
JrRDR1g	JmRDR1.16	0.149977	0.390105	0.384453	26.007
JrRDR1g	JmRDR1.17	0.0730949	0.158122	0.462268	10.5415
JrRDR1g	JmRDR1.18	0.110867	0.299071	0.370704	19.9381
JrRDR1g	JmRDR1.19	0.0742622	0.153011	0.48534	10.2007
JrRDR1g	JmRDR1.20	0	0	0	0
JrRDR1g	JmRDR1.21	0.137271	0.332865	0.412393	22.191
JrRDR1g	JmRDR1.22	0.137343	0.338427	0.405827	22.5618
JrRDR1g	JmRDR1.23	0.0688149	0.159627	0.431099	10.6418
JrRDR1g	JmRDR1.24	0.0790046	0.136047	0.580717	9.06977
JrRDR1g	JmRDR1.25	0.0382517	0.0867392	0.440997	5.78261
JrRDR1g	JmRDR1.26	0.0254069	0.040121	0.633258	2.67473
JrRDR1g	JmRDR1.27	0.254906	1.12645	0.226291	75.0969
JrRDR1g	JmRDR1.28	0.126842	0.303962	0.417295	20.2641
JrRDR1g	JmRDR1.29	0.137887	0.334355	0.412399	22.2903
JrRDR1g	JmRDR1.30	0.126956	0.315884	0.401908	21.0589
JrRDR1g	JmRDR1.31	0.136947	0.359997	0.380413	23.9998
JrRDR1g	JnRDR1.1	0	0	0	0
JrRDR1g	JnRDR1.2	0	0	0	0
JrRDR1g	JnRDR1.3	0	0	0	0
JrRDR1g	JnRDR1.4	0.628143	2.00326	0.313561	133.55
JrRDR1g	JnRDR1.5	0.679734	0	0	0
JrRDR1g	JnRDR1.6	0.135863	0.360459	0.376915	24.0306
JrRDR1g	JnRDR1.7	0	0	0	0
JrRDR1g	JnRDR1.8	0	0	0	0
JrRDR1g	JnRDR1.9	0.134562	0.315784	0.426121	21.0523
JrRDR1g	JnRDR1.10	0.683121	0	0	0
JrRDR1g	JnRDR1.11	0.919888	0	0	0
JrRDR1g	JnRDR1.12	0.789862	0.974462	0.810562	64.9641
JrRDR1g	JnRDR1.13	0	0	0	0
JrRDR1g	JnRDR1.14	0.703417	0	0	0
JrRDR1g	JnRDR1.15	0.729649	1.15045	0.634231	76.6965
JrRDR1g	JnRDR1.16	0.739871	0	0	0
JrRDR1g	JnRDR1.17	0	0	0	0
JrRDR1g	JnRDR1.18	0	0	0	0
JrRDR1g	JnRDR1.19	0	0	0	0
JrRDR1g	JnRDR1.20	0.0647895	0.162918	0.397683	10.8612
JrRDR1g	JnRDR1.21	0	0	0	0
JrRDR1g	JnRDR1.22	0	0	0	0
JrRDR1g	JnRDR1.23	0	0	0	0
JrRDR1g	JnRDR1.24	0	0	0	0
JrRDR1g	JsRDR1.1	0.133577	0.321915	0.414946	21.461
JrRDR1g	JsRDR1.2	0.13343	0.26835	0.497225	17.89
JrRDR1g	JsRDR1.3	0.228756	0.409186	0.55905	27.2791
JrRDR1g	JsRDR1.4	0.261598	1.10729	0.236251	73.8193
JrRDR1g	JsRDR1.5	0.00467838	0.00438331	1.06732	0.29222
JrRDR1g	JsRDR1.6	0.0587821	0.147961	0.397283	9.86403
JrRDR1g	JsRDR1.7	0.114854	0.31636	0.363047	21.0907
JrRDR1g	JsRDR1.8	0.132132	0.295155	0.447672	19.677
JrRDR1g	JsRDR1.9	0.121752	0.320997	0.379292	21.3998
JrRDR1g	JsRDR1.10	0.128705	0.320143	0.402025	21.3428
JrRDR1g	JsRDR1.11	0.123324	0.302732	0.407371	20.1821
JrRDR1g	JsRDR1.12	0.131653	0.339948	0.387272	22.6632
JrRDR1g	PsRDR1.5	0.147122	0.407959	0.36063	27.1973
JrRDR1g	PsRDR1.6	0.139982	0.284627	0.49181	18.9751
JrRDR1g	PsRDR1.7	0.136917	0.29196	0.46896	19.464
JrRDR1g	PsRDR1.22	0.0616968	0.158439	0.389404	10.5626
JrRDR1g	PsRDR1.23	0.0602664	0.119952	0.502423	7.99677
JrRDR1g	PsRDR1.24	0.0669874	0.213235	0.314149	14.2156
JrRDR1g	PsRDR1.13	0.0421781	0.0852018	0.495037	5.68012
JrRDR1g	PsRDR1.28	0.276062	1.15759	0.23848	77.1726
JrRDR1g	PsRDR1.1	0.141875	0.356331	0.398156	23.7554
JrRDR1g	PsRDR1.2	0.152608	0.38116	0.400379	25.4107
JrRDR1g	PsRDR1.25	0.0692603	0.14935	0.463745	9.95666
JrRDR1g	PsRDR1.29	0.271186	1.15176	0.235453	76.7843
JrRDR1g	PsRDR1.30	0.294506	1.19818	0.245794	79.8787
JrRDR1g	PsRDR1.8	0.146421	0.287921	0.508545	19.1947
JrRDR1g	PsRDR1.9	0.144178	0.296408	0.486417	19.7606
JrRDR1g	PsRDR1.26	0.0609036	0.150005	0.406011	10.0003
JrRDR1g	PsRDR1.27	0.06502	0.16564	0.392539	11.0426
JrRDR1g	PsRDR1.12	0.143182	0.299182	0.478577	19.9455
JrRDR1g	PsRDR1.14	0.129227	0.278604	0.463838	18.5736
JrRDR1g	PsRDR1.15	0.127669	0.339184	0.376401	22.6123
JrRDR1g	PsRDR1.16	0.14587	0.29935	0.487289	19.9567
JrRDR1g	PsRDR1.3	0.137398	0.345147	0.398086	23.0098
JrRDR1g	PsRDR1.4	0.178576	0.375619	0.475419	25.0412
JrRDR1g	PsRDR1.17	0.137628	0.312208	0.440823	20.8139
JrRDR1g	PsRDR1.18	0.129541	0.354181	0.365749	23.6121
JrRDR1g	PsRDR1.19	0.128725	0.35395	0.363682	23.5967
JrRDR1g	PsRDR1.20	0.170166	0.363772	0.467782	24.2515
JrRDR1g	PsRDR1.21	0.110516	0.315432	0.350364	21.0288
JrRDR1g	PsRDR1.10	0.135512	0.280384	0.483308	18.6923
JrRDR1g	PsRDR1.11	0.149661	0.321029	0.466193	21.4019
JrRDR1h	CcRDR1C	0.138906	0.31115	0.446429	20.7433
JrRDR1h	CcRDR1B	0.147208	0.324248	0.453998	21.6166
JrRDR1h	CcRDR1A	0.154198	0.331091	0.465727	22.0727
JrRDR1h	CiRDR1A	0.148503	0.335959	0.442028	22.3973
JrRDR1h	CiRDR1B	0.191014	0.356173	0.536296	23.7449
JrRDR1h	CiRDR1C	0.274186	1.26032	0.217553	84.0211
JrRDR1h	CiRDR1D	0.309219	0.863943	0.357916	57.5962
JrRDR1h	CiRDR1E	0.151681	0.3759	0.403513	25.06
JrRDR1h	CiRDR1F	0.105648	0.259526	0.407082	17.3017
JrRDR1h	CiRDR1G	0.140341	0.301711	0.465152	20.1141
JrRDR1h	CiRDR1H	0.165882	0.371059	0.447051	24.7373
JrRDR1h	CiRDR1I	0.0594319	0.136518	0.43534	9.10122
JrRDR1h	CiRDR1J	0.0680403	0.142666	0.476921	9.51106
JrRDR1h	CiRDR1K	0.0520128	0.108872	0.477741	7.25816
JrRDR1h	JcRDR1C	0	0	0	0
JrRDR1h	JcRDR1G	0	0	0	0
JrRDR1h	JcRDR1D	0	0	0	0
JrRDR1h	JcRDR1A	0	0	0	0
JrRDR1h	JcRDR1B	0.131862	0.302206	0.436332	20.1471
JrRDR1h	JcRDR1H	0	0	0	0
JrRDR1h	JcRDR1F	0	0	0	0
JrRDR1h	JcRDR1J	0	0	0	0
JrRDR1h	JcRDR1I	0	0	0	0
JrRDR1h	JcRDR1K	0	0	0	0
JrRDR1h	JcRDR1E	0	0	0	0
JrRDR1h	JhRDR1.8	0	0	0	0
JrRDR1h	JhRDR1.9	0	0	0	0
JrRDR1h	JhRDR1.1	0	0	0	0
JrRDR1h	JhRDR1.10	0	0	0	0
JrRDR1h	JhRDR1.6	0	0	0	0
JrRDR1h	JhRDR1.11	0	0	0	0
JrRDR1h	JhRDR1.7	0	0	0	0
JrRDR1h	JhRDR1.12	0	0	0	0
JrRDR1h	JhRDR1.13	0	0	0	0
JrRDR1h	JhRDR1.14	0	0	0	0
JrRDR1h	JhRDR1.5	0	0	0	0
JrRDR1h	JhRDR1.15	0	0	0	0
JrRDR1h	JhRDR1.3	0	0	0	0
JrRDR1h	JhRDR1.16	0	0	0	0
JrRDR1h	JhRDR1.2	0	0	0	0
JrRDR1h	JhRDR1.17	0.819905	0	0	0
JrRDR1h	JhRDR1.18	0	0	0	0
JrRDR1h	JhRDR1.19	0	0	0	0
JrRDR1h	JhRDR1.4	0	0	0	0
JrRDR1h	JhRDR1.20	0	0	0	0
JrRDR1h	JmRDR1.1	0.112139	0.282452	0.39702	18.8301
JrRDR1h	JmRDR1.2	0.178411	0.328405	0.543264	21.8937
JrRDR1h	JmRDR1.3	0.117726	0.310075	0.37967	20.6717
JrRDR1h	JmRDR1.4	0.181974	0.296685	0.613357	19.779
JrRDR1h	JmRDR1.5	0.359061	1.54481	0.232431	102.987
JrRDR1h	JmRDR1.6	0.131371	0.324948	0.404284	21.6632
JrRDR1h	JmRDR1.7	0.13001	0.285115	0.455991	19.0077
JrRDR1h	JmRDR1.8	0.130859	0.285306	0.458662	19.0204
JrRDR1h	JmRDR1.9	0.129514	0.325942	0.397353	21.7295
JrRDR1h	JmRDR1.10	0.128175	0.28348	0.452147	18.8986
JrRDR1h	JmRDR1.11	0.139587	0.321332	0.434402	21.4222
JrRDR1h	JmRDR1.12	0.230882	0.404933	0.570173	26.9955
JrRDR1h	JmRDR1.13	0.189744	0.297983	0.636763	19.8655
JrRDR1h	JmRDR1.14	0.0767122	0.147563	0.51986	9.83754
JrRDR1h	JmRDR1.15	0.105942	0.167036	0.634245	11.1357
JrRDR1h	JmRDR1.16	0.169705	0.341898	0.49636	22.7932
JrRDR1h	JmRDR1.17	0.12801	0.252455	0.507059	16.8304
JrRDR1h	JmRDR1.18	0.146023	0.347527	0.420177	23.1684
JrRDR1h	JmRDR1.19	0.177282	0.335645	0.528182	22.3763
JrRDR1h	JmRDR1.20	0	0	0	0
JrRDR1h	JmRDR1.21	0.0640278	0.109289	0.58586	7.28591
JrRDR1h	JmRDR1.22	0.148453	0.341779	0.434354	22.7853
JrRDR1h	JmRDR1.23	0.123046	0.254649	0.483198	16.9766
JrRDR1h	JmRDR1.24	0.15949	0.285863	0.557925	19.0576
JrRDR1h	JmRDR1.25	0.132099	0.337945	0.390887	22.5297
JrRDR1h	JmRDR1.26	0.184266	0.296685	0.621082	19.779
JrRDR1h	JmRDR1.27	0.250002	1.11923	0.223369	74.6156
JrRDR1h	JmRDR1.28	0.0202861	0.0637068	0.318429	4.24712
JrRDR1h	JmRDR1.29	0.0784576	0.140465	0.558556	9.36434
JrRDR1h	JmRDR1.30	0.060334	0.142301	0.423989	9.48673
JrRDR1h	JmRDR1.31	0.131497	0.31764	0.413982	21.176
JrRDR1h	JnRDR1.1	0	0	0	0
JrRDR1h	JnRDR1.2	0.910718	1.29431	0.70363	86.2876
JrRDR1h	JnRDR1.3	0.823959	0	#NAME?	0
JrRDR1h	JnRDR1.4	0.56839	1.55101	0.366464	103.401
JrRDR1h	JnRDR1.5	0.665477	0	0	0
JrRDR1h	JnRDR1.6	0.129472	0.317653	0.407589	21.1769
JrRDR1h	JnRDR1.7	0.819905	0	0	0
JrRDR1h	JnRDR1.8	0.691473	0	0	0
JrRDR1h	JnRDR1.9	0.0855505	0.179914	0.475509	11.9942
JrRDR1h	JnRDR1.10	0.897789	0	0	0
JrRDR1h	JnRDR1.11	0.814417	0	0	0
JrRDR1h	JnRDR1.12	0.674531	0	0	0
JrRDR1h	JnRDR1.13	0	0	0	0
JrRDR1h	JnRDR1.14	0	0	0	0
JrRDR1h	JnRDR1.15	0	0	0	0
JrRDR1h	JnRDR1.16	0	0	0	0
JrRDR1h	JnRDR1.17	0	0	0	0
JrRDR1h	JnRDR1.18	0	0	0	0
JrRDR1h	JnRDR1.19	0	0	0	0
JrRDR1h	JnRDR1.20	0.117194	0.257403	0.455294	17.1602
JrRDR1h	JnRDR1.21	0	0	0	0
JrRDR1h	JnRDR1.22	1.104	0	0	0
JrRDR1h	JnRDR1.23	0	0	0	0
JrRDR1h	JnRDR1.24	0	0	0	0
JrRDR1h	JsRDR1.1	0.0611275	0.0953622	0.641003	6.35748
JrRDR1h	JsRDR1.2	0.144019	0.291544	0.493987	19.4363
JrRDR1h	JsRDR1.3	0.197067	0.409805	0.48088	27.3203
JrRDR1h	JsRDR1.4	0.258322	1.09329	0.236279	72.8862
JrRDR1h	JsRDR1.5	0.128831	0.295692	0.435694	19.7128
JrRDR1h	JsRDR1.6	0.121816	0.247566	0.492054	16.5044
JrRDR1h	JsRDR1.7	0.125245	0.301201	0.41582	20.08
JrRDR1h	JsRDR1.8	0.13673	0.280693	0.487116	18.7129
JrRDR1h	JsRDR1.9	0.0611728	0.132399	0.462035	8.82657
JrRDR1h	JsRDR1.10	0.0669091	0.124026	0.539477	8.26839
JrRDR1h	JsRDR1.11	0.0165663	0.0487002	0.34017	3.24668
JrRDR1h	JsRDR1.12	0.127994	0.28996	0.441421	19.3306
JrRDR1h	PsRDR1.5	0.15782	0.385298	0.409606	25.6865
JrRDR1h	PsRDR1.6	0.141808	0.281779	0.503258	18.7853
JrRDR1h	PsRDR1.7	0.14105	0.283707	0.497168	18.9138
JrRDR1h	PsRDR1.22	0.124985	0.252318	0.495349	16.8212
JrRDR1h	PsRDR1.23	0.112561	0.236951	0.475041	15.7967
JrRDR1h	PsRDR1.24	0.138085	0.272665	0.506428	18.1777
JrRDR1h	PsRDR1.13	0.139251	0.291784	0.477239	19.4523
JrRDR1h	PsRDR1.28	0.279101	1.12647	0.247765	75.0982
JrRDR1h	PsRDR1.1	0.138501	0.282485	0.490297	18.8323
JrRDR1h	PsRDR1.2	0.151418	0.313343	0.483234	20.8896
JrRDR1h	PsRDR1.25	0.130836	0.259381	0.504417	17.2921
JrRDR1h	PsRDR1.29	0.272733	1.13465	0.240367	75.6433
JrRDR1h	PsRDR1.30	0.291622	1.19889	0.243244	79.9257
JrRDR1h	PsRDR1.8	0.147507	0.305948	0.482129	20.3966
JrRDR1h	PsRDR1.9	0.141114	0.316676	0.44561	21.1117
JrRDR1h	PsRDR1.26	0.123248	0.256061	0.481322	17.0707
JrRDR1h	PsRDR1.27	0.128133	0.250251	0.512016	16.6834
JrRDR1h	PsRDR1.12	0.142745	0.307947	0.463537	20.5298
JrRDR1h	PsRDR1.14	0.0624508	0.128495	0.486018	8.56632
JrRDR1h	PsRDR1.15	0.0769267	0.116818	0.658518	7.78787
JrRDR1h	PsRDR1.16	0.0740242	0.134685	0.549611	8.97898
JrRDR1h	PsRDR1.3	0.13641	0.276108	0.494047	18.4072
JrRDR1h	PsRDR1.4	0.166931	0.343608	0.485817	22.9072
JrRDR1h	PsRDR1.17	0.0815362	0.121681	0.670084	8.11204
JrRDR1h	PsRDR1.18	0.0666456	0.136412	0.488561	9.09413
JrRDR1h	PsRDR1.19	0.0511225	0.102794	0.497331	6.85293
JrRDR1h	PsRDR1.20	0.0626228	0.0932086	0.671856	6.21391
JrRDR1h	PsRDR1.21	0.0841214	0.132561	0.634587	8.83739
JrRDR1h	PsRDR1.10	0.144762	0.315507	0.458823	21.0338
JrRDR1h	PsRDR1.11	0.151599	0.300757	0.504059	20.0505
JrRDR1i	CcRDR1C	0.140008	0.316966	0.441713	21.1311
JrRDR1i	CcRDR1B	0.142522	0.322319	0.442176	21.4879
JrRDR1i	CcRDR1A	0.160322	0.344669	0.465146	22.978
JrRDR1i	CiRDR1A	0.149763	0.336504	0.445055	22.4336
JrRDR1i	CiRDR1B	0.205005	0.406467	0.504359	27.0978
JrRDR1i	CiRDR1C	0.275679	1.35189	0.20392	90.1262
JrRDR1i	CiRDR1D	0.242204	0.901289	0.268731	60.0859
JrRDR1i	CiRDR1E	0.102662	0.251938	0.40749	16.7959
JrRDR1i	CiRDR1F	0.0449325	0.078876	0.56966	5.2584
JrRDR1i	CiRDR1G	0.126379	0.292247	0.43244	19.4831
JrRDR1i	CiRDR1H	0.142164	0.347785	0.40877	23.1857
JrRDR1i	CiRDR1I	0.151379	0.323548	0.467872	21.5699
JrRDR1i	CiRDR1J	0.12624	0.271644	0.464726	18.1096
JrRDR1i	CiRDR1K	0.117244	0.271409	0.431981	18.094
JrRDR1i	JcRDR1C	0	0	0	0
JrRDR1i	JcRDR1G	0	0	0	0
JrRDR1i	JcRDR1D	0	0	0	0
JrRDR1i	JcRDR1A	0	0	0	0
JrRDR1i	JcRDR1B	0.141866	0.313739	0.452178	20.9159
JrRDR1i	JcRDR1H	0	0	0	0
JrRDR1i	JcRDR1F	0	0	0	0
JrRDR1i	JcRDR1J	0	0	0	0
JrRDR1i	JcRDR1I	0	0	0	0
JrRDR1i	JcRDR1K	0	0	0	0
JrRDR1i	JcRDR1E	0	0	0	0
JrRDR1i	JhRDR1.8	0	0	0	0
JrRDR1i	JhRDR1.9	0	0	0	0
JrRDR1i	JhRDR1.1	0	0	0	0
JrRDR1i	JhRDR1.10	0	0	0	0
JrRDR1i	JhRDR1.6	0	0	0	0
JrRDR1i	JhRDR1.11	0	0	0	0
JrRDR1i	JhRDR1.7	0	0	0	0
JrRDR1i	JhRDR1.12	0.0556181	0.10884	0.511007	7.25602
JrRDR1i	JhRDR1.13	0	0	0	0
JrRDR1i	JhRDR1.14	0	0	0	0
JrRDR1i	JhRDR1.5	0	0	0	0
JrRDR1i	JhRDR1.15	0	0	0	0
JrRDR1i	JhRDR1.3	0	0	0	0
JrRDR1i	JhRDR1.16	0	0	0	0
JrRDR1i	JhRDR1.2	0	0	0	0
JrRDR1i	JhRDR1.17	0.766789	1.17392	0.653184	78.2616
JrRDR1i	JhRDR1.18	0	0	0	0
JrRDR1i	JhRDR1.19	0	0	0	0
JrRDR1i	JhRDR1.4	0	0	0	0
JrRDR1i	JhRDR1.20	0	0	0	0
JrRDR1i	JmRDR1.1	0.0508582	0.0979651	0.519146	6.53101
JrRDR1i	JmRDR1.2	0.057471	0.0881944	0.65164	5.87963
JrRDR1i	JmRDR1.3	0.0661119	0.171226	0.38611	11.415
JrRDR1i	JmRDR1.4	0.0662848	0.146109	0.453668	9.74058
JrRDR1i	JmRDR1.5	0.356367	1.23177	0.289314	82.1178
JrRDR1i	JmRDR1.6	0.136636	0.309659	0.441245	20.644
JrRDR1i	JmRDR1.7	0.142802	0.272594	0.523862	18.173
JrRDR1i	JmRDR1.8	0.131976	0.267168	0.49398	17.8112
JrRDR1i	JmRDR1.9	0.138013	0.348841	0.395634	23.2561
JrRDR1i	JmRDR1.10	0.131322	0.264713	0.496094	17.6475
JrRDR1i	JmRDR1.11	0.0805196	0.128351	0.627338	8.55675
JrRDR1i	JmRDR1.12	0.0798766	0.132316	0.603679	8.82109
JrRDR1i	JmRDR1.13	0.239692	0.497424	0.481866	33.1616
JrRDR1i	JmRDR1.14	0.18894	0.269083	0.702163	17.9389
JrRDR1i	JmRDR1.15	0.16723	0.335512	0.498433	22.3675
JrRDR1i	JmRDR1.16	0.157528	0.346231	0.454981	23.0821
JrRDR1i	JmRDR1.17	0.0330165	0.034044	0.969818	2.2696
JrRDR1i	JmRDR1.18	0.0825182	0.149429	0.552226	9.9619
JrRDR1i	JmRDR1.19	0.0376802	0.0565051	0.666846	3.76701
JrRDR1i	JmRDR1.20	0	0	0	0
JrRDR1i	JmRDR1.21	0.135994	0.283641	0.479457	18.9094
JrRDR1i	JmRDR1.22	0.142312	0.358596	0.39686	23.9064
JrRDR1i	JmRDR1.23	0.0334033	0.0344653	0.969185	2.29769
JrRDR1i	JmRDR1.24	0.0514903	0.0728427	0.70687	4.85618
JrRDR1i	JmRDR1.25	0.0858334	0.224533	0.382275	14.9689
JrRDR1i	JmRDR1.26	0.0662848	0.146109	0.453668	9.74058
JrRDR1i	JmRDR1.27	0.255978	1.10225	0.232232	73.4833
JrRDR1i	JmRDR1.28	0.124109	0.272304	0.455775	18.1536
JrRDR1i	JmRDR1.29	0.134277	0.277696	0.483539	18.513
JrRDR1i	JmRDR1.30	0.128714	0.285697	0.450525	19.0465
JrRDR1i	JmRDR1.31	0.140002	0.347423	0.402974	23.1615
JrRDR1i	JnRDR1.1	0.458182	1.20708	0.379579	80.4719
JrRDR1i	JnRDR1.2	0	0	0	0
JrRDR1i	JnRDR1.3	0	0	0	0
JrRDR1i	JnRDR1.4	0.628143	2.00326	0.313561	133.55
JrRDR1i	JnRDR1.5	0	0	0	0
JrRDR1i	JnRDR1.6	0.139437	0.347858	0.400845	23.1905
JrRDR1i	JnRDR1.7	0.766789	1.17392	0.653184	78.2616
JrRDR1i	JnRDR1.8	0	0	0	0
JrRDR1i	JnRDR1.9	0.134176	0.283667	0.473004	18.9111
JrRDR1i	JnRDR1.10	0	0	0	0
JrRDR1i	JnRDR1.11	0.854502	0	0	0
JrRDR1i	JnRDR1.12	0.789862	0.974462	0.810562	64.9641
JrRDR1i	JnRDR1.13	0.931679	0	0	0
JrRDR1i	JnRDR1.14	1.11841	1.67082	0.66938	111.388
JrRDR1i	JnRDR1.15	0	0	0	0
JrRDR1i	JnRDR1.16	0.739871	0	0	0
JrRDR1i	JnRDR1.17	0	0	0	0
JrRDR1i	JnRDR1.18	0	0	0	0
JrRDR1i	JnRDR1.19	0	0	0	0
JrRDR1i	JnRDR1.20	0.0325246	0.0348495	0.933289	2.3233
JrRDR1i	JnRDR1.21	0	0	0	0
JrRDR1i	JnRDR1.22	0	0	0	0
JrRDR1i	JnRDR1.23	0	0	0	0
JrRDR1i	JnRDR1.24	0.974462	0.22387	4.35281	14.9246
JrRDR1i	JsRDR1.1	0.130897	0.254257	0.51482	16.9505
JrRDR1i	JsRDR1.2	0.123248	0.248124	0.496722	16.5416
JrRDR1i	JsRDR1.3	0.239368	0.420872	0.568743	28.0581
JrRDR1i	JsRDR1.4	0.258627	1.12187	0.230533	74.791
JrRDR1i	JsRDR1.5	0.0588016	0.142533	0.412548	9.50218
JrRDR1i	JsRDR1.6	0.000425622	0.00285919	0.148861	0.190613
JrRDR1i	JsRDR1.7	0.11967	0.282313	0.423893	18.8208
JrRDR1i	JsRDR1.8	0.135991	0.252756	0.538032	16.8504
JrRDR1i	JsRDR1.9	0.130246	0.273998	0.475355	18.2665
JrRDR1i	JsRDR1.10	0.128335	0.278741	0.46041	18.5827
JrRDR1i	JsRDR1.11	0.117894	0.257681	0.457519	17.1787
JrRDR1i	JsRDR1.12	0.134758	0.309423	0.435515	20.6282
JrRDR1i	PsRDR1.5	0.155939	0.325405	0.479214	21.6937
JrRDR1i	PsRDR1.6	0.141304	0.263824	0.535599	17.5882
JrRDR1i	PsRDR1.7	0.147204	0.287469	0.512069	19.1646
JrRDR1i	PsRDR1.22	0.0299725	0.0489364	0.612478	3.26243
JrRDR1i	PsRDR1.23	0.0427097	0.0602616	0.708739	4.01744
JrRDR1i	PsRDR1.24	0.0339249	0.0733019	0.46281	4.8868
JrRDR1i	PsRDR1.13	0.0852053	0.169078	0.50394	11.2719
JrRDR1i	PsRDR1.28	0.275616	1.14759	0.240169	76.506
JrRDR1i	PsRDR1.1	0.143325	0.31128	0.460438	20.752
JrRDR1i	PsRDR1.2	0.156045	0.349192	0.446873	23.2795
JrRDR1i	PsRDR1.25	0.0423178	0.068696	0.616016	4.57973
JrRDR1i	PsRDR1.29	0.273647	1.12989	0.242189	75.326
JrRDR1i	PsRDR1.30	0.299401	1.20999	0.247441	80.6658
JrRDR1i	PsRDR1.8	0.148117	0.273768	0.54103	18.2512
JrRDR1i	PsRDR1.9	0.153587	0.272994	0.562603	18.1996
JrRDR1i	PsRDR1.26	0.0292881	0.0412707	0.709659	2.75138
JrRDR1i	PsRDR1.27	0.0360185	0.062025	0.58071	4.135
JrRDR1i	PsRDR1.12	0.144245	0.277009	0.520723	18.4673
JrRDR1i	PsRDR1.14	0.129903	0.244694	0.530878	16.3129
JrRDR1i	PsRDR1.15	0.129963	0.280089	0.464006	18.6726
JrRDR1i	PsRDR1.16	0.15031	0.278604	0.539511	18.5736
JrRDR1i	PsRDR1.3	0.138322	0.29843	0.463499	19.8953
JrRDR1i	PsRDR1.4	0.185705	0.313254	0.592825	20.8836
JrRDR1i	PsRDR1.17	0.14542	0.269885	0.538821	17.9923
JrRDR1i	PsRDR1.18	0.127542	0.280688	0.454393	18.7125
JrRDR1i	PsRDR1.19	0.116319	0.289635	0.401604	19.309
JrRDR1i	PsRDR1.20	0.177734	0.311164	0.57119	20.7443
JrRDR1i	PsRDR1.21	0.109437	0.257588	0.424851	17.1725
JrRDR1i	PsRDR1.10	0.144797	0.292527	0.494988	19.5018
JrRDR1i	PsRDR1.11	0.155208	0.289703	0.53575	19.3135

## Sheet: AGO
Supplementary table 4D
Gene A	Gene B	Ka	Ks	Ka_Ks	Myr
JrAGO1a	CcAGO10A	0.21908	2.63185	0.083242	175.456
JrAGO1a	CcAGO10B	0.254331	0	0	0
JrAGO1a	CcAGO10C	0.202498	0	0	0
JrAGO1a	CiAGO1B	0.0750822	0.409559	0.183324	27.304
JrAGO1a	CiAGO1A	0.0117571	0.0769126	0.152863	5.12751
JrAGO1a	CiAGO10A	0.172708	3.80091	0.0454384	253.394
JrAGO1a	CiAGO10B	0.245761	0	0	0
JrAGO1a	JcAGO1	0	0	0	0
JrAGO1a	JcAGO10C	0	0	0	0
JrAGO1a	JcAGO10A	0	0	0	0
JrAGO1a	JcAGO10B	0	0	0	0
JrAGO1a	JhAGO10C	0	0	0	0
JrAGO1a	JhAGO10B	0	0	0	0
JrAGO1a	JhAGO10A	0	0	0	0
JrAGO1a	JhAGO1B	0	0	0	0
JrAGO1a	JhAGO1C	0	0	0	0
JrAGO1a	JhAGO1A	0	0	0	0
JrAGO1a	JmAGO10C	0.209881	0	0	0
JrAGO1a	JmAGO10B	0.241316	0	0	0
JrAGO1a	JmAGO1A	0.0116647	0.0661946	0.176219	4.41297
JrAGO1a	JmAGO1C	0.0245636	0.0784161	0.313247	5.22774
JrAGO1a	JmAGO10A	0.204501	0	0	0
JrAGO1a	JmAGO1B	0.0503048	0.388362	0.129531	25.8908
JrAGO1a	JnAGO1B	0.0503175	0.392325	0.128255	26.155
JrAGO1a	JnAGO10A	0.192268	3.66521	0.0524576	244.347
JrAGO1a	JnAGO1A	0.00333693	0.0558583	0.0597392	3.72389
JrAGO1a	JnAGO10B	0.239445	0	0	0
JrAGO1a	JnAGO1C	0.0825275	0.36764	0.224479	24.5094
JrAGO1a	JnAGO10C	0.20726	0	0	0
JrAGO1a	JsAGO1B	0.0526285	0.392891	0.133952	26.1928
JrAGO1a	JsAGO10C	0.210507	0	0	0
JrAGO1a	JsAGO10A	0.188355	0	0	0
JrAGO1a	JsAGO1A	0	0.00643229	0	0.428819
JrAGO1a	JsAGO10B	0.250716	0	0	0
JrAGO1a	PsAGO10	0.136593	0	0	0
JrAGO1a	PsAGO1A	0.0552366	0.377976	0.146138	25.1984
JrAGO1a	PsAGO1B	0.0868525	0.360148	0.241158	24.0099
JrAGO1b	CcAGO10A	0.225907	3.78033	0.0597585	252.022
JrAGO1b	CcAGO10B	0.259029	2.51363	0.10305	167.575
JrAGO1b	CcAGO10C	0.225776	0	0	0
JrAGO1b	CiAGO1B	0.0545459	0.225801	0.241566	15.0534
JrAGO1b	CiAGO1A	0.0612717	0.408042	0.15016	27.2028
JrAGO1b	CiAGO10A	0.182655	3.72909	0.048981	248.606
JrAGO1b	CiAGO10B	0.268929	2.5508	0.105429	170.054
JrAGO1b	JcAGO1	0	0	0	0
JrAGO1b	JcAGO10C	0	0	0	0
JrAGO1b	JcAGO10A	1.17392	0.94925	1.23669	63.2833
JrAGO1b	JcAGO10B	0	0	0	0
JrAGO1b	JhAGO10C	0	0	0	0
JrAGO1b	JhAGO10B	0	0	0	0
JrAGO1b	JhAGO10A	0	0	0	0
JrAGO1b	JhAGO1B	0	0	0	0
JrAGO1b	JhAGO1C	0	0	0	0
JrAGO1b	JhAGO1A	0	0	0	0
JrAGO1b	JmAGO10C	0.225628	0	0	0
JrAGO1b	JmAGO10B	0.250145	2.90642	0.0860665	193.761
JrAGO1b	JmAGO1A	0.0631371	0.384465	0.164221	25.631
JrAGO1b	JmAGO1C	0.0446168	0.330996	0.134795	22.0664
JrAGO1b	JmAGO10A	0.216609	0	0	0
JrAGO1b	JmAGO1B	0.00721655	0.0346618	0.208199	2.31079
JrAGO1b	JnAGO1B	0.00742555	0.040679	0.18254	2.71194
JrAGO1b	JnAGO10A	0.216889	3.69891	0.0586359	246.594
JrAGO1b	JnAGO1A	0.0538039	0.385838	0.139447	25.7225
JrAGO1b	JnAGO10B	0.247976	2.90233	0.0854401	193.489
JrAGO1b	JnAGO1C	0.0732078	0.228322	0.320635	15.2215
JrAGO1b	JnAGO10C	0.223526	0	0	0
JrAGO1b	JsAGO1B	0.00225958	0.00836649	0.270075	0.557766
JrAGO1b	JsAGO10C	0.227707	0	0	0
JrAGO1b	JsAGO10A	0.210726	3.95658	0.0532596	263.772
JrAGO1b	JsAGO1A	0.0501571	0.390006	0.128606	26.0004
JrAGO1b	JsAGO10B	0.251321	3.11241	0.080748	207.494
JrAGO1b	PsAGO10	0.157569	4.39559	0.0358471	293.039
JrAGO1b	PsAGO1A	0.0107558	0.0421163	0.255384	2.80776
JrAGO1b	PsAGO1B	0.0812656	0.243394	0.333884	16.2263
JrAGO1c	CcAGO10A	0.24982	0	0	0
JrAGO1c	CcAGO10B	0.273333	2.80354	0.0974957	186.903
JrAGO1c	CcAGO10C	0.237067	0	0	0
JrAGO1c	CiAGO1B	0.046671	0.116534	0.400493	7.76892
JrAGO1c	CiAGO1A	0.0807028	0.374976	0.215221	24.9984
JrAGO1c	CiAGO10A	0.205492	0	0	0
JrAGO1c	CiAGO10B	0.278524	2.90244	0.095962	193.496
JrAGO1c	JcAGO1	0	0	0	0
JrAGO1c	JcAGO10C	0	0	0	0
JrAGO1c	JcAGO10A	0	0	0	0
JrAGO1c	JcAGO10B	0	0	0	0
JrAGO1c	JhAGO10C	0	0	0	0
JrAGO1c	JhAGO10B	0	0	0	0
JrAGO1c	JhAGO10A	0	0	0	0
JrAGO1c	JhAGO1B	0	0	0	0
JrAGO1c	JhAGO1C	0	0	0	0
JrAGO1c	JhAGO1A	0	0	0	0
JrAGO1c	JmAGO10C	0.241236	0	0	0
JrAGO1c	JmAGO10B	0.279214	3.58717	0.0778369	239.144
JrAGO1c	JmAGO1A	0.0858894	0.340569	0.252194	22.7046
JrAGO1c	JmAGO1C	0.0817364	0.326637	0.250237	21.7758
JrAGO1c	JmAGO10A	0.239769	0	0	0
JrAGO1c	JmAGO1B	0.0674222	0.227401	0.29649	15.1601
JrAGO1c	JnAGO1B	0.0665322	0.239483	0.277816	15.9655
JrAGO1c	JnAGO10A	0.241064	0	0	0
JrAGO1c	JnAGO1A	0.076685	0.348111	0.220289	23.2074
JrAGO1c	JnAGO10B	0.277044	3.57859	0.0774171	238.573
JrAGO1c	JnAGO1C	0.0108441	0.0313635	0.345757	2.0909
JrAGO1c	JnAGO10C	0.238907	0	0	0
JrAGO1c	JsAGO1B	0.00415442	0.00386474	1.07495	0.25765
JrAGO1c	JsAGO10C	0.237983	0	0	0
JrAGO1c	JsAGO10A	0.237235	0	0	0
JrAGO1c	JsAGO1A	0.0762665	0.352708	0.216231	23.5139
JrAGO1c	JsAGO10B	0.279585	3.71812	0.0751954	247.875
JrAGO1c	PsAGO10	0.179429	0	0	0
JrAGO1c	PsAGO1A	0.0697546	0.220796	0.315923	14.7197
JrAGO1c	PsAGO1B	0.0266456	0.0623784	0.42716	4.15856
JrAGO2a	CcAGO2	0.147277	0.49154	0.299625	32.7693
JrAGO2a	CiAGO2B	0.146687	0.501352	0.292583	33.4235
JrAGO2a	CiAGO2A	0.0304422	0.0936335	0.325121	6.24223
JrAGO2a	JmaAGO2	0.657652	0	0	0
JrAGO2a	JcAGO2A	0	0	0	0
JrAGO2a	JcAGO2B	0	0	0	0
JrAGO2a	JhAGO2B	0	0	0	0
JrAGO2a	JhAGO2A	0.364131	0.974462	0.373674	64.9641
JrAGO2a	JmAGO2A	0.0105184	0.040662	0.258678	2.7108
JrAGO2a	JmAGO2B	0.146995	0.491417	0.299126	32.7611
JrAGO2a	JnAGO2A	0	0	0	0
JrAGO2a	JnAGO2B	0.635473	2.28339	0.278302	152.226
JrAGO2a	JsAGO2A	0.000354505	0.00920433	0.038515	0.613622
JrAGO2a	JsAGO2B	0.14314	0.49227	0.290776	32.818
JrAGO2a	PsAGO2B	0.120685	0.423184	0.285184	28.2123
JrAGO2a	PsAGO2C	0.153361	0.477322	0.321295	31.8215
JrAGO2a	PsAGO2A	0.0104285	0.0594623	0.17538	3.96415
JrAGO2b	CcAGO2	0.0369772	0.0765463	0.483069	5.10309
JrAGO2b	CiAGO2B	0.033776	0.0781842	0.432005	5.21228
JrAGO2b	CiAGO2A	0.151963	0.51532	0.294891	34.3547
JrAGO2b	JmaAGO2	0.65223	0	0	0
JrAGO2b	JcAGO2A	0	0	0	0
JrAGO2b	JcAGO2B	0	0	0	0
JrAGO2b	JhAGO2B	0	0	0	0
JrAGO2b	JhAGO2A	0.43543	0	0	0
JrAGO2b	JmAGO2A	0.150376	0.48605	0.309384	32.4033
JrAGO2b	JmAGO2B	0.00984805	0.0235313	0.418508	1.56876
JrAGO2b	JnAGO2A	0	0	0	0
JrAGO2b	JnAGO2B	1.12622	1.7134	0.657301	114.226
JrAGO2b	JsAGO2A	0.145125	0.484253	0.299688	32.2836
JrAGO2b	JsAGO2B	0.0017397	0.0169479	0.10265	1.12986
JrAGO2b	PsAGO2B	0.0227462	0.0388491	0.585503	2.58994
JrAGO2b	PsAGO2C	0.0260934	0.0417374	0.625181	2.78249
JrAGO2b	PsAGO2A	0.115307	0.469704	0.245489	31.3136
JrAGO4a	CcAGO4B	0.0384839	0.443396	0.0867937	29.5597
JrAGO4a	CcAGO4A	0.0109309	0.0764682	0.142947	5.09788
JrAGO4a	CiAGO4B	0.0379813	0.440917	0.0861415	29.3945
JrAGO4a	CiAGO4A	0.0130312	0.0772863	0.16861	5.15242
JrAGO4a	JcAGO4B	0	0	0	0
JrAGO4a	JcAGO4A	0.83906	0	0	0
JrAGO4a	JhAGO4B	0	0	0	0
JrAGO4a	JhAGO4A	0	0	0	0
JrAGO4a	JmAGO4A	0.00848665	0.0313689	0.270543	2.09126
JrAGO4a	JmAGO4B	0.032534	0.435106	0.0747725	29.0071
JrAGO4a	JnAGO4A	0.83906	0	0	0
JrAGO4a	JnAGO4B	0.032534	0.435106	0.0747725	29.0071
JrAGO4a	JsAGO4	0.00761186	0.00780038	0.975832	0.520025
JrAGO4a	PsAGO4C	0.0544373	0.482826	0.112747	32.1884
JrAGO4a	PsAGO4A	0.007586	0.0479269	0.158283	3.19512
JrAGO4a	PsAGO4B	0.00806396	0.0479014	0.168345	3.19342
JrAGO4c	CcAGO4B	0.00742483	0.106938	0.0694308	7.12923
JrAGO4c	CcAGO4A	0.0407758	0.418172	0.0975098	27.8781
JrAGO4c	CiAGO4B	0.0069476	0.0981123	0.0708127	6.54082
JrAGO4c	CiAGO4A	0.040016	0.437091	0.0915509	29.1394
JrAGO4c	JcAGO4B	0	0	0	0
JrAGO4c	JcAGO4A	0.926637	0	0	0
JrAGO4c	JhAGO4B	0	0	0	0
JrAGO4c	JhAGO4A	0	0	0	0
JrAGO4c	JmAGO4A	0.0382295	0.420316	0.090954	28.0211
JrAGO4c	JmAGO4B	0.00308272	0.0528698	0.0583078	3.52465
JrAGO4c	JnAGO4A	0.926637	0	0	0
JrAGO4c	JnAGO4B	0.00308272	0.0528698	0.0583078	3.52465
JrAGO4c	JsAGO4	0.0426359	0.439981	0.096904	29.3321
JrAGO4c	PsAGO4C	0.0264874	0.0954071	0.277625	6.36047
JrAGO4c	PsAGO4A	0.0357311	0.426792	0.0837202	28.4528
JrAGO4c	PsAGO4B	0.0362316	0.426495	0.0849521	28.433
JrAGO4b	CcAGO4B	0.00742483	0.106938	0.0694308	7.12923
JrAGO4b	CcAGO4A	0.0407758	0.418172	0.0975098	27.8781
JrAGO4b	CiAGO4B	0.0069476	0.0981123	0.0708127	6.54082
JrAGO4b	CiAGO4A	0.040016	0.437091	0.0915509	29.1394
JrAGO4b	JcAGO4B	0	0	0	0
JrAGO4b	JcAGO4A	0.926637	0	0	0
JrAGO4b	JhAGO4B	0	0	0	0
JrAGO4b	JhAGO4A	0	0	0	0
JrAGO4b	JmAGO4A	0.0382295	0.420316	0.090954	28.0211
JrAGO4b	JmAGO4B	0.00308272	0.0528698	0.0583078	3.52465
JrAGO4b	JnAGO4A	0.926637	0	0	0
JrAGO4b	JnAGO4B	0.00308272	0.0528698	0.0583078	3.52465
JrAGO4b	JsAGO4	0.0426359	0.439981	0.096904	29.3321
JrAGO4b	PsAGO4C	0.0264874	0.0954071	0.277625	6.36047
JrAGO4b	PsAGO4A	0.0357311	0.426792	0.0837202	28.4528
JrAGO4b	PsAGO4B	0.0362316	0.426495	0.0849521	28.433
JrAGO5a	CcAGO5B	0.127202	0.511637	0.248617	34.1091
JrAGO5a	CcAGO5A	0.0314431	0.112014	0.280708	7.46758
JrAGO5a	CiAGO5B	0.132121	0.523604	0.25233	34.9069
JrAGO5a	CiAGO5A	0.0414228	0.153091	0.270576	10.2061
JrAGO5a	JmaAGO5	0.659988	0	0	0
JrAGO5a	JcAGO5	0	0	0	0
JrAGO5a	JhAGO5B	0	0	0	0
JrAGO5a	JhAGO5A	0	0	0	0
JrAGO5a	JmAGO5	0.0175335	0.0342631	0.51173	2.28421
JrAGO5a	JnAGO5A	0.0179408	0.0341129	0.525922	2.2742
JrAGO5a	JnAGO5B	0.137551	0.523176	0.262916	34.8784
JrAGO5a	JsAGO5A	0	0.00138632	0	0.0924215
JrAGO5a	JsAGO5B	0.120408	0.531804	0.226415	35.4536
JrAGO5a	PsAGO5A	0.0250117	0.0690728	0.362107	4.60485
JrAGO5a	PsAGO5B	0.116181	0.498596	0.233016	33.2397
JrAGO5a	PsAGO5D	0.123707	0.502438	0.246213	33.4959
JrAGO5a	PsAGO5E	0.124508	0.517383	0.240651	34.4922
JrAGO5a	PsAGO5C	0.117528	0.503501	0.233421	33.5668
JrAGO5b	CcAGO5B	0.0403118	0.113794	0.354251	7.58629
JrAGO5b	CcAGO5A	0.126783	0.538393	0.235484	35.8929
JrAGO5b	CiAGO5B	0.0425271	0.124155	0.342531	8.27703
JrAGO5b	CiAGO5A	0.137659	0.564753	0.243751	37.6502
JrAGO5b	JmaAGO5	0.647359	0	0	0
JrAGO5b	JcAGO5	0	0	0	0
JrAGO5b	JhAGO5B	0	0	0	0
JrAGO5b	JhAGO5A	0	0	0	0
JrAGO5b	JmAGO5	0.121994	0.555687	0.219538	37.0458
JrAGO5b	JnAGO5A	0.121407	0.555966	0.218371	37.0644
JrAGO5b	JnAGO5B	0.0152451	0.0631092	0.241567	4.20728
JrAGO5b	JsAGO5A	0.119891	0.543204	0.220711	36.2136
JrAGO5b	JsAGO5B	0.00221828	0.0242417	0.091507	1.61611
JrAGO5b	PsAGO5A	0.120705	0.520448	0.231926	34.6965
JrAGO5b	PsAGO5B	0.0150266	0.0783982	0.19167	5.22655
JrAGO5b	PsAGO5D	0.0230805	0.0779825	0.29597	5.19883
JrAGO5b	PsAGO5E	0.0263127	0.0897151	0.293292	5.98101
JrAGO5b	PsAGO5C	0.0151092	0.0781291	0.193388	5.20861
JrAGO6	CcAGO6	0.0181384	0.107262	0.169103	7.15083
JrAGO6	CiAGO6	0.0116635	0.0999397	0.116705	6.66265
JrAGO6	JcAGO6	0	0	0	0
JrAGO6	JmAGO6B	0.0175232	0.0570489	0.307162	3.80326
JrAGO6	JmAGO6A	0.00936804	0.0449161	0.208567	2.99441
JrAGO6	JnAGO6	0.00822324	0.0434671	0.189183	2.89781
JrAGO6	JsAGO6	0.00048158	0.0125888	0.0382546	0.839254
JrAGO6	PsAGO6A	0.0624424	0.126625	0.493127	8.4417
JrAGO6	PsAGO6B	0.0603176	0.145013	0.415945	9.66756
JrAGO7	CcAGO7	0.00864096	0.0438027	0.19727	2.92018
JrAGO7	CiAGO7	0.00907792	0.0543556	0.16701	3.62371
JrAGO7	JcAGO7	0	0	0	0
JrAGO7	JhAGO7	0	0	0	0
JrAGO7	JmAGO7	0.00647137	0.0289158	0.223801	1.92772
JrAGO7	JnAGO7	0.00560529	0.0245067	0.228725	1.63378
JrAGO7	JsAGO7	0.000427838	0.00425533	0.100542	0.283689
JrAGO7	PsAGO7	0.00820772	0.0422801	0.194127	2.81867
JrAGO10a	CcAGO10A	0.0603576	0.154162	0.391521	10.2774
JrAGO10a	CcAGO10B	0.172211	3.13942	0.0548545	209.295
JrAGO10a	CcAGO10C	0.0282211	0.28171	0.100178	18.7807
JrAGO10a	CiAGO10A	0.00454801	0.0609266	0.0746473	4.06177
JrAGO10a	CiAGO10B	0.17473	3.09425	0.0564693	206.283
JrAGO10a	JcAGO10C	0	0	0	0
JrAGO10a	JcAGO10A	0.31489	0	#NAME?	0
JrAGO10a	JcAGO10B	0	0	0	0
JrAGO10a	JhAGO10C	0	0	0	0
JrAGO10a	JhAGO10B	0	0	0	0
JrAGO10a	JhAGO10A	0	0	0	0
JrAGO10a	JmAGO10C	0.0271169	0.277777	0.0976212	18.5185
JrAGO10a	JmAGO10B	0.181123	3.84833	0.0470654	256.555
JrAGO10a	JmAGO10A	0.00689737	0.039874	0.172979	2.65827
JrAGO10a	JnAGO10A	0.00802028	0.03442	0.233012	2.29467
JrAGO10a	JnAGO10B	0.181038	3.72649	0.0485815	248.432
JrAGO10a	JnAGO10C	0.0274127	0.275347	0.0995571	18.3564
JrAGO10a	JsAGO10C	0.0259376	0.283256	0.0915693	18.8837
JrAGO10a	JsAGO10A	0.000443262	0.00440314	0.10067	0.293543
JrAGO10a	JsAGO10B	0.181242	3.58177	0.0506012	238.784
JrAGO10a	PsAGO10	0.0196958	0.267867	0.0735281	17.8578
JrAGO10c	CcAGO10A	0.058753	0.334895	0.175437	22.3263
JrAGO10c	CcAGO10B	0.181973	2.39167	0.0760864	159.444
JrAGO10c	CcAGO10C	0.00503284	0.0606315	0.083007	4.0421
JrAGO10c	CiAGO10A	0.024274	0.286415	0.0847511	19.0943
JrAGO10c	CiAGO10B	0.183055	2.4485	0.074762	163.234
JrAGO10c	JcAGO10C	0	0	0	0
JrAGO10c	JcAGO10A	0.37611	0.177292	2.12142	11.8194
JrAGO10c	JcAGO10B	0	0	0	0
JrAGO10c	JhAGO10C	0	0	0	0
JrAGO10c	JhAGO10B	0	0	0	0
JrAGO10c	JhAGO10A	0	0	0	0
JrAGO10c	JmAGO10C	0.00330879	0.0531838	0.0622142	3.54558
JrAGO10c	JmAGO10B	0.178276	2.69591	0.0661283	179.727
JrAGO10c	JmAGO10A	0.0310855	0.27095	0.114728	18.0633
JrAGO10c	JnAGO10A	0.0314099	0.262745	0.119545	17.5163
JrAGO10c	JnAGO10B	0.178184	2.66748	0.0667987	177.832
JrAGO10c	JnAGO10C	0.00307153	0.045963	0.0668261	3.0642
JrAGO10c	JsAGO10C	0.000436522	0.0159619	0.0273478	1.06413
JrAGO10c	JsAGO10A	0.0259376	0.270577	0.09586	18.0385
JrAGO10c	JsAGO10B	0.178022	2.60564	0.0683219	173.71
JrAGO10c	PsAGO10	0.00384048	0.0506983	0.0757516	3.37989
JrAGO10b	CcAGO10A	0.203026	2.60118	0.0780512	173.412
JrAGO10b	CcAGO10B	0.0103139	0.0473156	0.21798	3.15438
JrAGO10b	CcAGO10C	0.179752	3.13889	0.057266	209.259
JrAGO10b	CiAGO10A	0.170867	2.73421	0.0624922	182.28
JrAGO10b	CiAGO10B	0.0150499	0.0522087	0.288264	3.48058
JrAGO10b	JcAGO10C	0	0	0	0
JrAGO10b	JcAGO10A	1.26929	0	0	0
JrAGO10b	JcAGO10B	0	0	0	0
JrAGO10b	JhAGO10C	0	0	0	0
JrAGO10b	JhAGO10B	0	0	0	0
JrAGO10b	JhAGO10A	0	0	0	0
JrAGO10b	JmAGO10C	0.168634	2.55257	0.0660645	170.171
JrAGO10b	JmAGO10B	0.00794926	0.0329163	0.241499	2.19442
JrAGO10b	JmAGO10A	0.194418	2.82708	0.0687701	188.472
JrAGO10b	JnAGO10A	0.192781	2.80927	0.0686232	187.284
JrAGO10b	JnAGO10B	0.00797038	0.0329336	0.242014	2.19557
JrAGO10b	JnAGO10C	0.180631	2.54391	0.0710055	169.594
JrAGO10b	JsAGO10C	0.17784	2.52176	0.0705222	168.118
JrAGO10b	JsAGO10A	0.181856	3.55934	0.0510926	237.29
JrAGO10b	JsAGO10B	0.000465622	0.00153139	0.304051	0.102093
JrAGO10b	PsAGO10	0.1286	2.31848	0.0554673	154.566
