# Supplementary material for: RNA Interference Pathways in <em>Juglandaceae</em>: Based on Gene Diversity, Evolution, and Functional Differentiation
Source: Preprints.org preprint supplement (doi:10.20944/preprints202210.0323.v1), 2022-10-21
Supplement: Supplementary file 5 [file Supplementary table 5.xlsx]

## Sheet: Sheet1
Supplementary table 5
Gene name	element name	motif sequence	motif start	motif_longer	function
JrAGO2B	TGA-element	AACGAC	922	6	auxin-responsive element
JrDRB3X5X2	TGA-element	AACGAC	862	6	auxin-responsive element
JrRDR1A	TGA-element	AACGAC	819	6	auxin-responsive element
JrAGO4A	TC-rich repeats	ATTCTCTAAC	49	9	defense and stress responsiveness
JrAGO4B	TC-rich repeats	ATTCTCTAAC	648	9	defense and stress responsiveness
JrAGO6	TC-rich repeats	GTTTTCTTAC	332	9	defense and stress responsiveness
JrDCL3	TC-rich repeats	GTTTTCTTAC	824	9	defense and stress responsiveness
JrDRB7X2	TC-rich repeats	GTTTTCTTAC	574	9	defense and stress responsiveness
JrDRB7X4	TC-rich repeats	GTTTTCTTAC	574	9	defense and stress responsiveness
JrRDR1H	TC-rich repeats	GTTTTCTTAC	566	9	defense and stress responsiveness
JrAGO4A	TATC-box	TATCCCA	577	7	gibberellin-responsive element
JrDCL4	TATC-box	TATCCCA	17	7	gibberellin-responsive element
JrDCL4	TATC-box	TATCCCA	665	7	gibberellin-responsive element
JrDRB6X1	TATC-box	TATCCCA	64	7	gibberellin-responsive element
JrDRB6X2	TATC-box	TATCCCA	69	7	gibberellin-responsive element
JrAGO1C	ACE	CTAACGTATT	964	9	light responsiveness
JrAGO4A	ACE	CTAACGTATT	54	9	light responsiveness
JrAGO2A	LTR	CCGAAA	369	6	low-temperature responsiveness
JrAGO7	LTR	CCGAAA	871	6	low-temperature responsiveness
JrRDR1B	LTR	CCGAAA	368	6	low-temperature responsiveness
JrAGO10A	TCA-element	CCATCTTTTT	502	10	salicylic acid responsiveness
JrAGO10A	TCA-element	CCATCTTTTT	841	9	salicylic acid responsiveness
JrAGO10B	TCA-element	CCATCTTTTT	586	9	salicylic acid responsiveness
JrAGO10C	TCA-element	CCATCTTTTT	502	10	salicylic acid responsiveness
JrAGO1B	TCA-element	CCATCTTTTT	365	9	salicylic acid responsiveness
JrAGO4A	TCA-element	CCATCTTTTT	327	9	salicylic acid responsiveness
JrDCL3	TCA-element	TCAGAAGAGG	344	9	salicylic acid responsiveness
JrDCL3	TCA-element	TCAGAAGAGG	499	9	salicylic acid responsiveness
JrDRB3X5X1	TCA-element	CCATCTTTTT	187	9	salicylic acid responsiveness
JrDRB3X5X1	TCA-element	TCAGAAGAGG	482	9	salicylic acid responsiveness
JrDRB3X5X3	TCA-element	CCATCTTTTT	482	9	salicylic acid responsiveness
JrDRB3X5X4	TCA-element	CCATCTTTTT	462	9	salicylic acid responsiveness
JrDRB4A	TCA-element	CCATCTTTTT	501	9	salicylic acid responsiveness
JrDRB7X1	TCA-element	CCATCTTTTT	648	9	salicylic acid responsiveness
JrDRB7X2	TCA-element	CCATCTTTTT	800	9	salicylic acid responsiveness
JrDRB7X3	TCA-element	CCATCTTTTT	433	9	salicylic acid responsiveness
JrDRB7X4	TCA-element	CCATCTTTTT	800	9	salicylic acid responsiveness
JrRDR1G	TCA-element	CCATCTTTTT	526	9	salicylic acid responsiveness
JrRDR1I	TCA-element	CCATCTTTTT	357	9	salicylic acid responsiveness
JrRDR2	TCA-element	CCATCTTTTT	33	9	salicylic acid responsiveness
JrAGO1B	ABRE	GCAACGTGTC	766	9	abscisic acid responsiveness
JrAGO2A	ABRE	ACGTG	456	5	abscisic acid responsiveness
JrDCL1	ABRE	GCAACGTGTC	112	9	abscisic acid responsiveness
JrDCL1	ABRE	ACGTG	115	5	abscisic acid responsiveness
JrDCL1	ABRE	TACGGTC	732	7	abscisic acid responsiveness
JrDCL2B	ABRE	ACGTG	283	5	abscisic acid responsiveness
JrDRB7X2	ABRE	ACGTG	390	5	abscisic acid responsiveness
JrDRB7X2	ABRE	ACGTG	542	5	abscisic acid responsiveness
JrDRB7X2	ABRE	ACGTG	746	5	abscisic acid responsiveness
JrDRB7X2	ABRE	ACGTG	906	5	abscisic acid responsiveness
JrDRB7X3	ABRE	ACGTG	631	5	abscisic acid responsiveness
JrDRB7X4	ABRE	ACGTG	390	5	abscisic acid responsiveness
JrDRB7X4	ABRE	ACGTG	542	5	abscisic acid responsiveness
JrDRB7X4	ABRE	ACGTG	746	5	abscisic acid responsiveness
JrDRB7X4	ABRE	ACGTG	906	5	abscisic acid responsiveness
JrRDR1A	ABRE	GACACGTGGC	761	9	abscisic acid responsiveness
JrRDR1A	ABRE	ACGTG	764	5	abscisic acid responsiveness
JrRDR1A	ABRE	GCAACGTGTC	853	9	abscisic acid responsiveness
JrRDR1A	ABRE	ACGTG	856	5	abscisic acid responsiveness
JrRDR1B	ABRE	GCAACGTGTC	539	9	abscisic acid responsiveness
JrRDR1C	ABRE	ACGTG	55	5	abscisic acid responsiveness
JrRDR1F	ABRE	ACGTG	134	5	abscisic acid responsiveness
JrRDR1G	ABRE	CACGTG	366	6	abscisic acid responsiveness
JrRDR1G	ABRE	ACGTG	367	5	abscisic acid responsiveness
JrRDR2	ABRE	ACGTG	213	5	abscisic acid responsiveness
JrRDR3	ABRE	ACGTG	417	5	abscisic acid responsiveness
JrRDR3	ABRE	TACGTGTC	748	8	abscisic acid responsiveness
JrRDR3	ABRE	ACGTG	749	5	abscisic acid responsiveness
JrAGO10A	ARE	AAACCA	499	6	anoxic specific inducibility
JrAGO10A	ARE	AAACCA	746	6	anoxic specific inducibility
JrAGO10A	ARE	AAACCA	993	6	anoxic specific inducibility
JrAGO10C	ARE	AAACCA	756	6	anoxic specific inducibility
JrAGO1A	ARE	AAACCA	247	6	anoxic specific inducibility
JrAGO4B	ARE	AAACCA	447	6	anoxic specific inducibility
JrAGO5A	ARE	AAACCA	153	6	anoxic specific inducibility
JrDRB1X1	ARE	AAACCA	475	6	anoxic specific inducibility
JrDRB1X1	ARE	AAACCA	537	6	anoxic specific inducibility
JrDRB1X2	ARE	AAACCA	463	6	anoxic specific inducibility
JrDRB1X2	ARE	AAACCA	525	6	anoxic specific inducibility
JrDRB2X1	ARE	AAACCA	34	6	anoxic specific inducibility
JrDRB3X5X2	ARE	AAACCA	931	6	anoxic specific inducibility
JrDRB3X5X3	ARE	AAACCA	424	6	anoxic specific inducibility
JrDRB3X5X4	ARE	AAACCA	404	6	anoxic specific inducibility
JrDRB7X2	ARE	AAACCA	79	6	anoxic specific inducibility
JrDRB7X4	ARE	AAACCA	79	6	anoxic specific inducibility
JrRDR1F	ARE	AAACCA	299	6	anoxic specific inducibility
JrRDR1G	ARE	AAACCA	309	6	anoxic specific inducibility
JrAGO1A	AuxRR-core	GGTCCAT	811	7	auxin-responsive element
JrDRB3X5X3	circadian	CAAAGATATC	257	9	circadian control
JrDRB3X5X4	circadian	CAAAGATATC	237	9	circadian control
JrRDR1D	circadian	CAAAGATATC	398	9	circadian control
JrAGO10B	G-box	CACGTC	572	6	light responsiveness
JrAGO2A	G-box	TACGTG	455	6	light responsiveness
JrAGO4B	G-box	CACGTC	234	6	light responsiveness
JrAGO4B	G-box	CACGAC	716	6	light responsiveness
JrAGO5A	G-box	CACGTC	982	6	light responsiveness
JrAGO5B	G-box	CACGTC	829	6	light responsiveness
JrAGO5B	G-Box	CACGTT	978	6	light responsiveness
JrDCL1	G-Box	CACGTT	205	6	light responsiveness
JrDCL1	G-Box	CACGTT	227	6	light responsiveness
JrDRB3X5X2	G-box	TAACACGTAG	576	9	light responsiveness
JrDRB4A	G-box	CACGTC	454	6	light responsiveness
JrDRB7X2	G-box	CACGAC	473	6	light responsiveness
JrDRB7X2	G-box	ACACGTGGC	904	9	light responsiveness
JrDRB7X3	G-Box	CACGTT	778	6	light responsiveness
JrDRB7X4	G-box	CACGAC	473	6	light responsiveness
JrDRB7X4	G-box	ACACGTGGC	904	9	light responsiveness
JrRDR1A	G-box	TAACACGTAG	760	9	light responsiveness
JrRDR1A	G-box	ACACGTGGC	762	9	light responsiveness
JrRDR1A	G-box	CACGTC	914	6	light responsiveness
JrRDR1B	G-Box	CACGTT	305	6	light responsiveness
JrRDR1E	G-box	CACGTC	589	6	light responsiveness
JrRDR1F	G-Box	CACGTT	814	6	light responsiveness
JrRDR1F	G-box	TACGTG	133	6	light responsiveness
JrRDR1G	G-box	CACGTG	366	6	light responsiveness
JrRDR1G	G-Box	CACGTG	366	6	light responsiveness
JrRDR3	G-box	TAAACGTG	414	8	light responsiveness
JrRDR3	G-box	TACGTG	748	6	light responsiveness
JrRDR1C	RY-element	CATGCATG	44	8	seed-specific regulation
JrRDR1D	RY-element	CATGCATG	488	8	seed-specific regulation
JrAGO10A	TGACG-motif	TGACG	450	5	MeJA-responsiveness
JrAGO1B	TGACG-motif	TGACG	700	5	MeJA-responsiveness
JrAGO1B	CGTCA-motif	CGTCA	743	5	MeJA-responsiveness
JrAGO1C	TGACG-motif	TGACG	680	5	MeJA-responsiveness
JrAGO2A	CGTCA-motif	CGTCA	775	5	MeJA-responsiveness
JrAGO2A	CGTCA-motif	CGTCA	897	5	MeJA-responsiveness
JrAGO2B	CGTCA-motif	CGTCA	984	5	MeJA-responsiveness
JrAGO2B	TGACG-motif	TGACG	893	5	MeJA-responsiveness
JrAGO4A	CGTCA-motif	CGTCA	637	5	MeJA-responsiveness
JrAGO4A	CGTCA-motif	CGTCA	743	5	MeJA-responsiveness
JrAGO4A	CGTCA-motif	CGTCA	823	5	MeJA-responsiveness
JrAGO4B	CGTCA-motif	CGTCA	236	5	MeJA-responsiveness
JrAGO4B	CGTCA-motif	CGTCA	722	5	MeJA-responsiveness
JrAGO4B	CGTCA-motif	CGTCA	805	5	MeJA-responsiveness
JrAGO4C	CGTCA-motif	CGTCA	101	5	MeJA-responsiveness
JrDCL1	CGTCA-motif	CGTCA	64	5	MeJA-responsiveness
JrDCL1	CGTCA-motif	CGTCA	94	5	MeJA-responsiveness
JrDCL1	TGACG-motif	TGACG	108	5	MeJA-responsiveness
JrDCL2A	CGTCA-motif	CGTCA	656	5	MeJA-responsiveness
JrDCL2B	CGTCA-motif	CGTCA	551	5	MeJA-responsiveness
JrDCL2B	TGACG-motif	TGACG	281	5	MeJA-responsiveness
JrDCL4	CGTCA-motif	CGTCA	962	5	MeJA-responsiveness
JrDCL4	TGACG-motif	TGACG	868	5	MeJA-responsiveness
JrDRB4A	CGTCA-motif	CGTCA	456	5	MeJA-responsiveness
JrDRB6X1	CGTCA-motif	CGTCA	231	5	MeJA-responsiveness
JrDRB7X1	TGACG-motif	TGACG	151	5	MeJA-responsiveness
JrDRB7X2	TGACG-motif	TGACG	388	5	MeJA-responsiveness
JrDRB7X2	CGTCA-motif	CGTCA	850	5	MeJA-responsiveness
JrDRB7X3	TGACG-motif	TGACG	629	5	MeJA-responsiveness
JrDRB7X4	TGACG-motif	TGACG	388	5	MeJA-responsiveness
JrDRB7X4	CGTCA-motif	CGTCA	850	5	MeJA-responsiveness
JrRDR1A	CGTCA-motif	CGTCA	770	5	MeJA-responsiveness
JrRDR1A	CGTCA-motif	CGTCA	903	5	MeJA-responsiveness
JrRDR1A	CGTCA-motif	CGTCA	916	5	MeJA-responsiveness
JrRDR1B	CGTCA-motif	CGTCA	488	5	MeJA-responsiveness
JrRDR1B	CGTCA-motif	CGTCA	585	5	MeJA-responsiveness
JrRDR1C	CGTCA-motif	CGTCA	367	5	MeJA-responsiveness
JrRDR1D	CGTCA-motif	CGTCA	413	5	MeJA-responsiveness
JrRDR1E	CGTCA-motif	CGTCA	385	5	MeJA-responsiveness
JrRDR1E	CGTCA-motif	CGTCA	479	5	MeJA-responsiveness
JrRDR1F	CGTCA-motif	CGTCA	159	5	MeJA-responsiveness
JrRDR1G	TGACG-motif	TGACG	864	5	MeJA-responsiveness
JrRDR1G	CGTCA-motif	CGTCA	337	5	MeJA-responsiveness
JrAGO1B	O2-site	GATGATGTGG	899	9	zein metabolism regulation
JrAGO1C	O2-site	GATGATGTGG	896	9	zein metabolism regulation
JrAGO2A	O2-site	GTTGACGTGA	502	9	zein metabolism regulation
JrAGO2A	O2-site	GTTGACGTGA	522	9	zein metabolism regulation
JrAGO4A	O2-site	GATGACATGG	865	9	zein metabolism regulation
JrDCL2A	O2-site	GATGA(C/T)(A/G)TG(A/G)	43	8	zein metabolism regulation
JrDCL2A	O2-site	GATGA(C/T)(A/G)TG(A/G)	172	8	zein metabolism regulation
JrDCL2A	O2-site	GATGA(C/T)(A/G)TG(A/G)	177	8	zein metabolism regulation
JrDCL2B	O2-site	GATGATGTGG	972	9	zein metabolism regulation
JrDCL3	O2-site	GTTGACGTGA	113	9	zein metabolism regulation
JrDRB2X1	O2-site	GTTGACGTGA	362	9	zein metabolism regulation
JrDRB2X1	O2-site	GTTGACGTGA	603	9	zein metabolism regulation
JrDRB3X5X1	O2-site	GATGACATGG	340	9	zein metabolism regulation
JrDRB7X2	O2-site	GATGATGTGG	862	9	zein metabolism regulation
JrDRB7X4	O2-site	GATGATGTGG	862	9	zein metabolism regulation
JrRDR1B	O2-site	GATGA(C/T)(A/G)TG(A/G)	54	8	zein metabolism regulation
JrRDR1E	O2-site	GTTGACGTGA	922	9	zein metabolism regulation
JrRDR6A	O2-site	GTTGACGTGA	253	9	zein metabolism regulation
JrRDR6B	O2-site	GTTGACGTGA	270	9	zein metabolism regulation
JrAGO2A	CAT-box	GCCACT	54	6	meristem expression
JrRDR1D	CAT-box	GCCACT	450	6	meristem expression
JrRDR1G	CAT-box	GCCACT	374	6	meristem expression
JrRDR1G	CAT-box	GCCACT	474	6	meristem expression
JrRDR1I	CAT-box	GCCACT	204	6	meristem expression
JrRDR1I	CAT-box	GCCACT	304	6	meristem expression
JrAGO10A	GCN4_motif	TGAGTCA	468	7	endosperm expression
JrDRB3X5X2	GCN4_motif	TGAGTCA	782	7	endosperm expression
JrAGO5A	AT-rich sequence	TAAAATACT	870	9	maximal elicitor-mediated activation
JrDRB3X5X3	HD-Zip 1	CAAT(A/T)ATTG	10	8.5	palisade mesophyll cells differentiation
JrAGO2A	GC-motif	CCCCCG	893	6	anoxic specific inducibility
JrAGO5B	GC-motif	CCCCCG	477	6	anoxic specific inducibility
JrRDR1C	GC-motif	CCCCCG	128	6	anoxic specific inducibility
JrRDR1D	GC-motif	CCCCCG	173	6	anoxic specific inducibility
JrRDR1E	GC-motif	CCCCCG	237	6	anoxic specific inducibility
JrRDR3	GC-motif	CCCCCG	757	6	anoxic specific inducibility
JrAGO1B	P-box	CCTTTTG	421	7	gibberellin-responsive element
JrAGO4A	P-box	CCTTTTG	896	7	gibberellin-responsive element
JrAGO4C	GARE-motif	TCTGTTG	859	7	gibberellin-responsive element
JrDRB3X5X2	P-box	CCTTTTG	885	7	gibberellin-responsive element
JrRDR1H	P-box	CCTTTTG	478	7	gibberellin-responsive element
JrRDR6A	GARE-motif	TCTGTTG	763	7	gibberellin-responsive element
JrRDR6B	GARE-motif	TCTGTTG	763	7	gibberellin-responsive element
JrAGO1A	Sp1	GGGCGG	66	6	light responsiveness
JrAGO1A	Sp1	GGGCGG	70	6	light responsiveness
JrAGO5A	GT1-motif	GGTTAA	867	6	light responsiveness
JrAGO5A	GT1-motif	GGTTAA	883	6	light responsiveness
JrAGO6	GT1-motif	GGTTAAT	412	7	light responsiveness
JrDCL2B	GT1-motif	GGTTAAT	273	7	light responsiveness
JrDCL3	Sp1	GGGCGG	983	6	light responsiveness
JrDRB3X5X1	GT1-motif	GGTTAA	313	6	light responsiveness
JrDRB3X5X2	GT1-motif	GGTTAA	423	6	light responsiveness
JrDRB3X5X2	Sp1	GGGCGG	760	6	light responsiveness
JrDRB3X5X3	GT1-motif	GGTTAA	863	6	light responsiveness
JrDRB3X5X3	AAAC-motif	CAATCAAAACCT	68	11	light responsiveness
JrDRB3X5X4	GT1-motif	GGTTAA	843	6	light responsiveness
JrDRB3X5X4	AAAC-motif	CAATCAAAACCT	48	11	light responsiveness
JrDRB4A	Sp1	GGGCGG	46	6	light responsiveness
JrDRB6X1	GT1-motif	GGTTAA	423	6	light responsiveness
JrDRB6X2	GT1-motif	GGTTAA	427	6	light responsiveness
JrDRB7X1	GT1-motif	GGTTAAT	791	7	light responsiveness
JrDRB7X3	GT1-motif	GGTTAA	555	6	light responsiveness
JrDRB7X3	GT1-motif	GGTTAA	825	6	light responsiveness
JrRDR3	Sp1	GGGCGG	764	6	light responsiveness
JrRDR3	Sp1	GGGCGG	768	6	light responsiveness
JrAGO1A	MBS	CAACTG	914	6	drought-inducibility
JrAGO4A	MBS	CAACTG	627	6	drought-inducibility
JrAGO6	MBS	CAACTG	765	6	drought-inducibility
JrDRB3X5X3	MBS	CAACTG	179	6	drought-inducibility
JrDRB3X5X4	MBS	CAACTG	159	6	drought-inducibility
JrDRB7X2	MBS	CAACTG	281	6	drought-inducibility
JrDRB7X4	MBS	CAACTG	281	6	drought-inducibility
JrRDR1A	MBS	CAACTG	712	6	drought-inducibility
JrRDR1F	MBS	CAACTG	613	6	drought-inducibility
JrRDR6A	MBS	CAACTG	718	6	drought-inducibility
JrRDR6B	MBS	CAACTG	718	6	drought-inducibility
JrAGO10A	MRE	AACCTAA	212	7	light responsiveness
JrDRB7X2	MRE	AACCTAA	258	7	light responsiveness
JrDRB7X2	MRE	AACCTAA	301	7	light responsiveness
JrDRB7X4	MRE	AACCTAA	258	7	light responsiveness
JrDRB7X4	MRE	AACCTAA	301	7	light responsiveness
JrAGO10A	Box 4	ATTAAT	14	6	light responsiveness
JrAGO2B	Box 4	ATTAAT	69	6	light responsiveness
JrAGO2B	Box 4	ATTAAT	199	6	light responsiveness
JrAGO4A	Box 4	ATTAAT	1	6	light responsiveness
JrAGO4A	Box 4	ATTAAT	16	6	light responsiveness
JrAGO4B	Box 4	ATTAAT	481	6	light responsiveness
JrDCL2B	Box 4	ATTAAT	170	6	light responsiveness
JrDCL2B	Box 4	ATTAAT	185	6	light responsiveness
JrDCL2B	Box 4	ATTAAT	262	6	light responsiveness
JrDCL2B	Box 4	ATTAAT	430	6	light responsiveness
JrDCL3	Box 4	ATTAAT	174	6	light responsiveness
JrDCL3	Box 4	ATTAAT	196	6	light responsiveness
JrDCL3	Box 4	ATTAAT	211	6	light responsiveness
JrDRB1X1	Box 4	ATTAAT	84	6	light responsiveness
JrDRB1X1	Box 4	ATTAAT	225	6	light responsiveness
JrDRB1X1	Box 4	ATTAAT	367	6	light responsiveness
JrDRB1X2	Box 4	ATTAAT	72	6	light responsiveness
JrDRB1X2	Box 4	ATTAAT	213	6	light responsiveness
JrDRB1X2	Box 4	ATTAAT	355	6	light responsiveness
JrDRB2X2	Box 4	ATTAAT	254	6	light responsiveness
JrDRB3X5X2	ATCT-motif	AATCTAATCC	387	9	light responsiveness
JrDRB3X5X2	Box 4	ATTAAT	152	6	light responsiveness
JrDRB6X1	Box 4	ATTAAT	193	6	light responsiveness
JrDRB6X1	Box 4	ATTAAT	435	6	light responsiveness
JrDRB6X1	ATC-motif	AGTAATCT	840	8	light responsiveness
JrDRB6X2	ATC-motif	AGTAATCT	845	8	light responsiveness
JrDRB6X2	Box 4	ATTAAT	198	6	light responsiveness
JrDRB6X2	Box 4	ATTAAT	439	6	light responsiveness
JrDRB7X1	Box 4	ATTAAT	267	6	light responsiveness
JrDRB7X1	Box 4	ATTAAT	424	6	light responsiveness
JrDRB7X2	Box 4	ATTAAT	10	6	light responsiveness
JrDRB7X2	Box 4	ATTAAT	351	6	light responsiveness
JrDRB7X4	Box 4	ATTAAT	10	6	light responsiveness
JrDRB7X4	Box 4	ATTAAT	351	6	light responsiveness
JrRDR1A	Box 4	ATTAAT	83	6	light responsiveness
JrRDR1F	Box 4	ATTAAT	54	6	light responsiveness
JrRDR1G	Box 4	ATTAAT	64	6	light responsiveness
JrRDR2	Box 4	ATTAAT	314	6	light responsiveness
JrRDR3	Box 4	ATTAAT	139	6	light responsiveness
JrRDR3	Box 4	ATTAAT	193	6	light responsiveness
JrRDR3	Box 4	ATTAAT	210	6	light responsiveness
JrRDR3	Box 4	ATTAAT	263	6	light responsiveness
JrRDR6A	ATC-motif	AGTAATCT	33	8	light responsiveness
JrRDR6B	ATC-motif	AGTAATCT	50	8	light responsiveness
JrAGO1B	chs-CMA1a	TTACTTAA	605	8	light responsiveness
JrAGO1B	TCT-motif	TCTTAC	61	6	light responsiveness
JrAGO1C	TCT-motif	TCTTAC	464	6	light responsiveness
JrAGO2A	chs-CMA1a	TTACTTAA	218	8	light responsiveness
JrAGO2B	chs-CMA1a	TTACTTAA	327	8	light responsiveness
JrAGO2B	chs-CMA1a	TTACTTAA	422	8	light responsiveness
JrAGO4C	chs-CMA1a	TTACTTAA	972	8	light responsiveness
JrAGO5A	GA-motif	ATAGATAA	802	8	light responsiveness
JrAGO5A	LAMP-element	CTTTATCA	24	8	light responsiveness
JrAGO5B	TCCC-motif	TCTCCCT	900	7	light responsiveness
JrAGO6	TCT-motif	TCTTAC	336	6	light responsiveness
JrDCL1	GA-motif	ATAGATAA	498	8	light responsiveness
JrDCL2A	GATA-motif	AAGGATAAGG	289	9	light responsiveness
JrDCL3	GATA-motif	AAGATAAGATT	144	10	light responsiveness
JrDCL4	GA-motif	ATAGATAA	421	8	light responsiveness
JrDRB2X1	TCCC-motif	TCTCCCT	976	7	light responsiveness
JrDRB2X2	LAMP-element	CTTTATCA	70	8	light responsiveness
JrDRB3X5X1	chs-CMA2a	TCACTTGA	659	8	light responsiveness
JrDRB3X5X1	TCCC-motif	TCTCCCT	933	7	light responsiveness
JrDRB3X5X1	TCCC-motif	TCTCCCT	974	7	light responsiveness
JrDRB3X5X2	Box II	ACACGTAGA	578	9	light responsiveness
JrDRB3X5X3	TCT-motif	TCTTAC	771	6	light responsiveness
JrDRB3X5X4	TCT-motif	TCTTAC	751	6	light responsiveness
JrDRB7X2	TCT-motif	TCTTAC	578	6	light responsiveness
JrDRB7X3	chs-CMA1a	TTACTTAA	917	8	light responsiveness
JrDRB7X4	TCT-motif	TCTTAC	578	6	light responsiveness
JrRDR1B	GA-motif	ATAGATAA	36	8	light responsiveness
JrRDR1C	TCT-motif	TCTTAC	96	6	light responsiveness
JrRDR1D	TCT-motif	TCTTAC	145	6	light responsiveness
JrRDR1E	TCCC-motif	TCTCCCT	523	7	light responsiveness
JrRDR1E	TCT-motif	TCTTAC	210	6	light responsiveness
JrRDR1F	GATA-motif	GATAGGA	858	7	light responsiveness
JrRDR1F	TCT-motif	TCTTAC	16	6	light responsiveness
JrRDR6A	I-box	gGATAAGGTG	242	9	light responsiveness
JrRDR6A	TCT-motif	TCTTAC	314	6	light responsiveness
JrRDR6B	I-box	gGATAAGGTG	259	9	light responsiveness
JrRDR6B	TCT-motif	TCTTAC	331	6	light responsiveness
JrAGO5B	AT1-motif	AATTATTTTTTATT	274	13	light responsiveness
JrAGO6	AT1-motif	AATTATTTTTTATT	668	14	light responsiveness
JrRDR3	AT1-motif	AATTATTTTTTATT	571	13	light responsiveness
JrAGO4B	AE-box	AGAAACAA	771	8	light responsiveness
JrAGO5A	AE-box	AGAAACAA	918	8	light responsiveness
JrDRB2X1	AE-box	AGAAACTT	812	8	light responsiveness
