# Supplementary material for: RNA Interference Pathways in <em>Juglandaceae</em>: Based on Gene Diversity, Evolution, and Functional Differentiation
Source: Preprints.org preprint supplement (doi:10.20944/preprints202210.0323.v1), 2022-10-21
Supplement: Supplementary file 6 [file Supplementary table 6.xlsx]

## Sheet: Sheet1
Supplementary table 6
Gene Name	Gene ID	Chr.	Location	Number of amino acids	Isoelectric point (PI)	Molecular weight (Da)	No. of introns	Subcellular localization
JrAGO1a	Jr06_16920	Jr06	33902210-33910096	1061	9.71	117735	21	Cytoplasmic: 7.9
JrAGO1b	Jr15_11560	Jr15	18157459-18165957	1073	9.8	118854	21	Cytoplasmic: 7.9
JrAGO1c	Jr15_11570	Jr15	18170643-18180448	1064	9.75	117450	21	Cytoplasmic: 7.9
JrAGO2a	Jr03_09750	Jr03	7646848-7654507	1232	9.6	136429	3	Extracellular (Secreted): 2.5
JrAGO2b	Jr04_15030	Jr04	28409916-28414772	1006	9.76	112262	3	Cytoplasmic: 8.6
JrAGO4a	Jr05_10980	Jr05	13046665-13056464	928	8.84	103830	24	Nuclear: 5.2
JrAGO4b	Jr14_14640	Jr14	15678641-15687805	922	8.87	102832	24	Nuclear: 5.2
JrAGO4c	Jr14_14650	Jr14	15678953-15686447	926	8.88	103355	22	Nuclear: 5.2
JrAGO5a	Jr05_13150	Jr05	18295588-18303224	995	9.95	111116	22	Cytoplasmic: 7.6
JrAGO5b	Jr14_17740	Jr14	22892343-22899415	991	9.87	110147	22	Cytoplasmic: 7.7
JrAGO6	Jr10_13510	Jr10	11792742-11798998	906	9.67	101001	22	Nuclear: 8.5
JrAGO7	Jr13_14910	Jr13	11292221-11295909	1015	9.68	115758	3	Cytoplasmic: 7.7
JrAGO10a	Jr07_24420	Jr07	40805757-40814305	980	9.24	109925	21	Cytoplasmic: 7.9
JrAGO10b	Jr01_29210	Jr01	39972224-39985361	934	9.52	106034	22	Cytoplasmic: 7.8
JrAGO10c	Jr12_15330	Jr12	24615802-24623835	996	9.35	111830	21	Cytoplasmic: 7.9
JrDCL1	Jr07_10040	Jr07	13796572-13818495	1995	6.2	223876	20	Nuclear: 7.5
JrDCL2a	Jr08_14810	Jr08	18141516-18157219	1404	6.9	158931	22	Nuclear: 7.5
JrDCL2b	Jr11_11410	Jr11	18675532-18689147	1403	7.73	159156	22	Nuclear: 7.5
JrDCL3	Jr05_05420	Jr05	4746760-4764220	1661	7.24	186000	25	Nuclear: 8.9
JrDCL4	Jr06_20150	Jr06	37872650-37902311	1658	6.47	185840	25	Nuclear: 8.8
JrRDR1a	Jr16_06890	Jr16	9244412-9260924	1131	7.47	129030	5	Extracellular (Secreted): 2.5
JrRDR1b	Jr01_27530	Jr01	37670908-37674546	898	7.66	102580	4	Extracellular (Secreted): 2.4
JrRDR1c	Jr02_23630	Jr02	35693679-35697271	1029	7.95	118294	4	Extracellular (Secreted): 2.3
JrRDR1d	Jr16_06830	Jr16	9027910-9031397	992	8.52	113640	4	Extracellular (Secreted): 2.4
JrRDR1e	Jr16_07070	Jr16	9764109-9769482	386	5.09	44040.4	5	Extracellular (Secreted): 2.4
JrRDR1f	Jr16_07080	Jr16	9764109-9800009	630	6.71	71522.2	3	Extracellular (Secreted): 2.4
JrRDR1g	Jr16_06870	Jr16	9197408-9202051	1015	6.39	116216	4	Extracellular (Secreted): 3.1
JrRDR1h	Jr16_06770	Jr16	8784857-8789107	1013	7.36	116411	4	Extracellular (Secreted): 2.8
JrRDR1i	Jr16_06850	Jr16	9146454-9150914	1017	7.59	116336	4	Extracellular (Secreted): 2.5
JrRDR2	Jr02_03810	Jr02	3551757-3559025	1110	6.63	126402	4	Extracellular (Secreted): 2.3
JrRDR3	Jr01_27830	Jr01	38113244-38137524	992	7.61	112226	19	Extracellular (Secreted): 2.4
JrRDR6a	Jr11_29310	Jr11	35769632-35773730	1199	7.29	137133	2	Extracellular (Secreted): 2.4
JrRDR6b	Jr03_21840	Jr03	27491959-27494754	931	7.34	106286	1	Extracellular (Secreted): 2.4
JrDRB1.1	Jr08_07480	Jr08	5902689-5907794	446	8.5	48459	2	chloroplast: 9.5
JrDRB1.2	Jr08_07490	Jr08	5902701-5907422	441	8.49	47904.3	2	chloroplast: 7.5
JrDRB2.1	Jr05_09960	Jr05	10509312-10514514	399	9.56	43687	2	chloroplast: 7
JrDRB2.2	Jr14_13750	Jr14	12659200-12663504	397	9.53	43161.3	2	chloroplast: 6
JrDRB3-5.1	Jr10_00540	Jr10	351325-353034	495	9.23	54280.5	2	Nuclear: 14
JrDRB3-5.2	Jr11_01480	Jr11	1065672-1071358	544	9.31	60304	3	Nuclear: 9
JrDRB3-5.3	Jr01_01240	Jr01	976794-978941	487	9.74	53322.5	3	Nuclear: 8
JrDRB3-5.4	Jr01_01260	Jr01	976976-978921	508	9.6	55743.3	3	Nuclear: 13
JrDRB4A	Jr03_20100	Jr03	21549624-21565491	409	6.01	44796.3	4	Nuclear: 12
JrDRB7.4	Jr06_10860	Jr06	18957824-18963906	445	9.06	48014.9	4	vacuolar : 7
JrDRB6.1	Jr04_05370	Jr04	9502104-9503717	208	8.75	23195.3	4	Nuclear: 9
JrDRB6.2	Jr_Scaffold_739_00020	Jr_Scaffold_739	72072-73683	208	8.75	23179.3	4	Nuclear: 9
JrDRB7.2	Jr06_10870	Jr06	18957824-18963910	217	5.69	23875.3	2	chloroplast: 4
JrDRB7.3	Jr09_15630	Jr09	23425702-23428514	160	9.44	17836.6	1	Nuclear: 6.5
JrDRB7.1	Jr03_17090	Jr03	14774240-14784807	959	5.6	106482	8	Nuclear: 9
