# Supplementary material for: RNA Interference Pathways in <em>Juglandaceae</em>: Based on Gene Diversity, Evolution, and Functional Differentiation
Source: Preprints.org preprint supplement (doi:10.20944/preprints202210.0323.v1), 2022-10-21
Supplement: Supplementary file 7 [file Supplementary table 7.xlsx]

## Sheet: tissue
Supplementary table 7A
SRA number	SRR1067931	SRR1067933	SRR1067935	SRR1067938	SRR1067941	SRR1068161	SRR1068163	SRR1068165	SRR1068166	SRR1068167	SRR1068168	SRR1068169	SRR1068170	SRR1068171	SRR1068172	SRR1068173	SRR1068174	SRR1068175	SRR1068421
gene\tissue	vegetative bud	young leaf	root	callus interior	callus exterior	catkins	somatic embryo	mature leaf-jun08	mature leaf-apr08	immature fruit	immature hull	immature packing tissue	hull peel	hull cortex	mature packing tissue	pellicle	mature embryo	dehiscing hull	pistillate flower
JrAGO1a	107.913	83.2926	24.9436	41.9823	43.5546	74.2123	95.5668	25.7698	83.9116	75.2981	63.792	68.9095	29.9645	29.0403	54.3536	38.5778	21.7013	27.4706	110.675
JrAGO1b	167.44	125.414	84.9852	43.2787	44.8758	90.624	113.103	54.3384	129.909	313.292	312.454	219.06	333.208	512.052	481.159	301.447	28.1865	510.323	271.519
JrAGO1c	37.4527	19.264	47.1047	70.5788	43.8609	31.601	41.4506	3.79569	17.4489	87.7577	100.271	66.5289	27.1316	37.3052	77.9358	149.753	13.725	28.9617	43.6953
JrAGO2a	1.39547	0.27939	1.4193	0.856767	0.370511	0.624287	15.9655	0.0376841	0.664915	1.81542	0.881041	3.18302	0.576545	0.44027	0.661334	0.135255	1.24611	0.0630115	1.03907
JrAGO2b	22.8225	22.648	10.0032	25.6811	25.6873	12.4666	38.7994	54.4631	25.3379	14.9014	17.9687	13.3765	11.5755	9.80282	25.0969	41.2594	0.898049	5.4103	28.5293
JrAGO4a	22.2834	13.229	22.5392	13.7155	16.0226	21.6931	160.004	4.83495	11.864	42.7387	25.6908	53.3336	24.5537	20.3318	32.6962	47.6704	19.4447	57.53	40.125
JrAGO4b	29.3624	24.8299	5.06478	17.8769	8.91202	15.2373	68.9862	17.0365	19.9465	20.2514	16.1551	18.3504	20.2071	19.1704	30.7857	10.0344	3.2013	7.99819	41.8074
JrAGO4c	0	0	0	0	0	0	0	0	0	0	0	0.0282249	0	0	0	0.0599673	0	0	0
JrAGO5a	53.0441	53.3998	11.9386	53.3348	43.9244	51.0538	99.4649	9.82649	35.3799	77.3766	59.4	106.874	17.5444	11.2837	34.402	147.381	1.34563	17.7559	52.3357
JrAGO5b	5.62397	5.71059	6.19166	1.33797	3.3388	62.5936	18.0618	0.0468392	3.08041	49.8712	29.3682	54.2807	0.252922	0.444625	12.7626	20.8461	0.0837214	1.25312	9.0822
JrAGO6	12.3595	13.5465	5.22081	2.47874	3.52577	6.50649	22.2887	2.40775	8.16252	6.33078	2.93984	9.28881	1.29092	0.673329	3.12296	10.2966	0.457837	0.899426	17.315
JrAGO7	15.8575	23.6967	2.16149	2.63938	1.57376	3.40931	5.91705	5.80806	11.9572	2.39474	1.52282	4.04313	3.66306	1.76988	10.0957	14.7181	3.59672	0	44.501
JrAGO10a	46.9845	32.5018	10.1786	1.29775	1.28064	4.27201	7.69023	2.55768	28.0852	16.8652	16.7447	21.2036	9.12204	3.87357	5.2498	3.17331	3.13242	6.29624	46.847
JrAGO10b	15.4468	14.2871	4.07359	2.28863	2.19869	2.65272	7.69036	0.347862	8.84806	4.44109	3.59115	2.77035	0.491958	0.580592	0.550808	2.43762	0.621777	0.872491	10.2989
JrAGO10c	118.923	144.659	20.3403	22.8215	16.1521	28.7379	31.5678	1.67775	115.048	43.7967	30.9048	67.2612	47.3528	34.643	34.0926	40.4795	14.2862	1.12994	132.772
JrDCL1	25.208	26.4445	14.2687	21.4145	28.3808	22.4745	27.5204	25.5834	22.6032	34.2936	27.0806	30.0839	33.8345	30.5627	48.2065	38.2109	8.73789	31.957	40.6863
JrDCL2a	8.42404	6.0207	2.19802	3.87508	3.90183	4.59595	7.25719	1.91811	5.18092	11.2446	6.79465	11.6949	3.12507	1.78697	10.5995	10.5244	3.51713	0.967709	13.9722
JrDCL2b	10.8811	9.21468	3.15274	38.4504	46.4486	21.1077	38.8725	0.992831	6.03396	97.1144	29.613	170.982	2.88903	11.0436	40.8385	47.7105	0.591535	0.691713	46.7738
JrDCL3	10.6037	6.28728	13.3373	26.7285	36.833	6.48402	35.7815	5.42365	5.93437	66.0527	34.3054	95.5899	27.0977	22.7005	28.6889	36.9929	9.59441	59.7892	11.4635
JrDCL4	14.52	7.91368	3.26796	16.2457	18.381	6.57308	8.27767	2.15658	7.14311	9.0537	5.45672	10.614	3.42799	4.06976	8.09708	9.81782	0.80098	2.084	17.6373
JrRDR1a	41.5595	24.3707	14.2639	103.846	83.6527	14.9787	55.1607	9.75013	26.3435	86.3736	52.4514	69.6837	40.7043	48.8351	53.6235	25.9468	6.19574	11.778	47.9121
JrRDR1b	2.47085	2.59124	0.497779	1.51939	0.883636	0.579005	0.684005	0.53924	2.45073	1.25496	0.955094	1.11338	0.0808829	0	0.0830118	0	0.0401603	0.0375693	2.43812
JrRDR1c	0.151864	0.297292	0.0666283	0.289279	0.33265	0.249109	0.801105	0	0.26532	0.283463	0.255681	0.304828	0	0	0.0833342	0.0539705	0	0	0.200622
JrRDR1d	2.73039	4.81828	2.31522	1.28206	0.46006	2.41165	2.07739	0	4.37829	4.47572	4.84004	2.97742	0.126334	0.68335	0.345757	0.167945	0	0.0391205	6.95046
JrRDR1e	0.232768	0.170877	0.0510619	0.0806161	0	0.0636364	0.087706	0	0.295758	0.241375	0.0489865	0.116806	0.0622269	0.100977	0.0638647	0	0	0.173422	0.246001
JrRDR1f	0	0	0.054351	0.0858089	0	0	0	0	0.157404	0.154154	0.0521419	0	0.0662351	0	0	0	0	0	0.261847
JrRDR1g	1.69352	0.828819	0.472825	1.30636	0.786879	1.3048	1.27623	0.228664	1.46714	8.68494	6.93371	11.7431	0.288106	0.133576	0.0844825	0.164143	0.0408718	0.114705	3.9457
JrRDR1h	3.75367	4.30326	1.86119	2.43088	1.91476	4.13298	5.05685	4.85723	3.7731	13.9489	6.13577	26.9901	2.8455	3.04485	3.63991	4.33095	0.982859	2.06875	7.25484
JrRDR1i	1.43411	0.563994	0.606723	3.08653	1.90724	1.38625	16.5004	1.00414	1.0982	2.54938	1.42282	2.69869	0.780464	0.766553	5.56489	0.982921	1.22375	0.534236	2.31405
JrRDR2	11.5919	7.82065	3.67535	14.3359	13.3639	6.04311	16.5516	12.5885	8.02778	19.3886	13.2742	24.4453	23.7876	25.4081	28.5856	24.5675	7.28851	5.45461	14.1728
JrRDR3	2.41535	1.38766	0.518332	0.327335	0.115015	3.40215	3.97671	0.140376	1.25094	2.12352	1.52494	1.58093	0.33689	0.170837	1.42625	3.52684	2.96911	0.0782409	6.90884
JrRDR6a	62.3507	41.8169	38.3168	46.4994	55.7725	33.1775	38.5064	25.0134	39.108	76.7495	47.8696	90.9868	58.0203	57.1692	87.837	68.0047	14.4994	36.4187	68.8803
JrRDR6b	34.07	24.0665	27.6865	28.6274	33.2091	18.9041	24.1572	17.9975	20.632	46.3639	31.1176	49.3812	36.3426	36.513	63.5928	47.8954	9.35667	28.3847	37.8694
JrDRB1.1	4.38305	5.29568	1.38216	8.15931	2.20019	6.0663	4.7481	8.21876	3.65476	5.34052	3.97794	7.28572	5.05313	7.01146	11.2742	7.39897	1.89084	5.37458	4.41509
JrDRB1.2	0	0	0	0	0	0	0	0	0	0	0	0	0	0	0	0	0	0	0
JrDRB2.1	26.9859	19.6665	29.1256	38.1325	32.6723	16.2577	52.2459	10.319	13.7466	24.178	23.0474	25.2617	47.4567	49.2322	38.4477	72.5037	16.4905	22.6646	32.5129
JrDRB2.2	60.2208	33.6438	66.297	32.6646	23.2673	29.6489	81.8231	8.16818	34.2042	50.1003	54.0296	48.7467	20.954	34.2256	18.8262	34.7968	11.1888	14.743	60.77
JrDRB3-5.1	14.8221	23.6141	3.04395	0.819163	1.15131	6.72493	11.2886	0.281035	13.4737	0.654048	0.265475	0.844014	0.590152	0.205212	0.173053	0	0.669771	0.0783198	10.6653
JrDRB3-5.2	13.7069	12.3223	20.3566	22.3525	42.3872	11.242	16.0741	5.74818	9.04569	16.9197	16.3823	17.8026	22.1035	35.4864	29.6237	28.9931	12.7847	17.0932	14.3506
JrDRB3-5.3	0	0	0	0	0	0	0	0	0	0	0	0	0	0	0	0	0	0	0
JrDRB3-5.4	0	0	0	0	0	0	0	0	0	0	0	0	0	0	0	0	0	0	0
JrDRB4A	44.3493	27.2825	48.4267	72.723	77.2455	46.8052	65.7223	58.2891	28.5689	79.6975	67.5759	77.4158	99.8164	135.05	157.846	157.788	40.4515	75.9293	49.4236
JrDRB7.4	31.9568	24.9414	18.5404	34.8199	40.8945	17.3124	76.8101	40.2442	29.4918	44.3183	35.4675	45.1548	44.1771	31.5205	54.6155	34.0711	24.1117	45.6134	39.1284
JrDRB6.1	0	0	0.985079	0.90722	0	0.204611	8.17806	0.222318	0	1.70741	0.315014	5.00755	0	0	0.82138	1.06392	0	0	2.57065
JrDRB6.2	0	0	0.32836	0.259206	0	0.409222	5.64004	0	0	1.55219	0.315014	4.63198	0	0.162336	0.41069	0.531958	0	0	7.31647
JrDRB7.2	0	0	0	0	0	0	0	0	0	0	0	0	0	0	0	0	0	0	0
JrDRB7.3	0.21605	0.317208	0.42655	0.392836	0	0.354395	0.24422	0	0.205887	0.268846	0.136404	0.162624	0.259909	0.281174	0.622416	0.230344	0.43017	0.402417	0.513748
JrDRB7.1	5.6485	4.94403	2.03737	3.16015	3.45009	2.36091	7.85846	2.61363	4.73582	5.8461	3.46334	8.39442	2.35218	1.97915	5.58816	5.44315	0.735353	0.809305	7.61988

## Sheet: stress
Supplementary table 7B
SRA number	SRR12958235	SRR12958236	SRR12958237	SRR12958238	SRR12958239	SRR12958240	SRR12958241	SRR12958242	SRR12958243	SRR12958244	SRR12958245	SRR12958246	SRR12958247	SRR12958248	SRR12958249	SRR17994869	SRR17994870	SRR17994871	SRR17994872	SRR17994873	SRR17994874	SRR17994875	SRR17994876	SRR17994877
gene\stress	0.25 mol/L Nitrogen	0.15 mol/L Nitrogen	0.15 mol/L Nitrogen	0.15 mol/L Nitrogen	0.05 mol/L Nitrogen	0.05 mol/L Nitrogen	0.05 mol/L Nitrogen	0 mol/L Nitrogen	0.35 mol/L Nitrogen	0.35 mol/L Nitrogen	0.35 mol/L Nitrogen	0.25 mol/L Nitrogen	0.25 mol/L Nitrogen	0 mol/L Nitrogen	0 mol/L Nitrogen	transcriptome of walnut under heat stress	transcriptome of walnut under heat stress	transcriptome of walnut under heat stress	transcriptome of walnut under heat stress	transcriptome of walnut under heat stress	transcriptome of walnut under heat stress	transcriptome of walnut under heat stress	transcriptome of walnut under heat stress	transcriptome of walnut under heat stress
JrAGO1a	14.7124	14.0989	19.1401	20.8132	26.087	24.6492	19.3189	22.1472	23.8075	28.6442	22.5143	21.2846	14.6998	24.7436	26.5192	6.17576	7.26507	7.53923	14.4128	16.4984	15.7647	118.722	113.872	119.093
JrAGO1b	12.4249	35.1802	37.7115	34.4856	45.2907	47.7003	37.5012	41.5632	39.3643	52.8861	38.1526	34.2488	21.9853	49.2925	47.9974	30.4611	33.5081	40.9393	49.9192	59.487	58.594	245.577	267.677	250.138
JrAGO1c	10.1354	17.9365	20.7103	23.1033	12.5823	19.491	16.1645	13.0983	11.002	15.4302	13.4972	12.9157	8.28359	17.0859	16.5953	5.74292	5.54744	5.31993	8.59791	7.9204	7.33278	47.8346	42.5072	47.5989
JrAGO2a	0.142259	0.43641	0.880601	0.492105	0.474395	0.756758	0.845572	0.177082	0.482488	0.526095	0.608619	0.291657	0.433311	0.6242	0.534131	83.3775	81.085	72.9434	87.0736	96.7484	94.4627	1.76784	2.6299	2.29175
JrAGO2b	6.26781	6.16254	12.265	9.05157	3.92146	8.65768	8.11705	7.14587	6.26502	7.62212	6.12224	5.52174	3.92284	6.53888	6.34967	62.9272	61.2123	46.1941	37.6837	30.6065	39.5384	6.94977	6.76519	7.53935
JrAGO4a	9.51469	11.1181	17.114	14.8066	17.6373	19.7133	15.1525	15.1805	16.7137	19.5743	17.9591	11.67	11.2231	17.8253	15.1634	10.18	12.0057	16.107	12.9121	11.2717	13.8154	59.3083	64.0937	62.8496
JrAGO4b	1.54758	2.61741	3.10985	2.43313	2.62461	2.88405	2.39212	2.55451	2.22504	3.31605	2.59093	2.78923	2.33995	4.85826	2.51043	7.04696	5.32613	5.10333	3.69308	3.25535	3.2184	12.3542	11.6563	12.0027
JrAGO4c	0	0	0	0	0	0	0	0	0	0	0	0	0	0	0	0	0	0	0	0	0	0	0	0
JrAGO5a	15.372	14.2846	33.3758	29.8733	13.3316	28.3834	20.3958	16.7884	13.9511	16.6525	11.5078	16.8007	11.6346	15.2593	18.0124	10.3425	10.1682	12.8165	8.61708	5.12849	6.02095	28.4927	30.092	28.0449
JrAGO5b	2.20345	1.55655	2.40544	1.29822	1.92975	1.59775	1.70162	1.34508	1.47319	0.912745	1.85207	1.32058	1.48438	1.8842	1.88305	5.24726	4.07923	3.38581	1.42009	0.708604	1.07841	6.52921	7.5952	7.03548
JrAGO6	1.05621	1.74111	3.15982	2.34826	2.34511	3.25538	2.2853	1.04317	1.49718	3.62064	2.39653	1.6001	1.59476	1.6668	1.53144	1.52084	1.24922	1.98248	1.3441	1.77966	1.32691	18.0244	14.1604	17.6793
JrAGO7	5.88314	4.23696	3.70311	7.21528	7.52359	4.0384	3.37171	6.16058	9.50865	7.22258	7.90822	6.96522	13.5441	5.89782	8.66248	1.17836	1.27452	1.13534	1.27989	2.12685	1.6847	16.4278	17.2409	16.7209
JrAGO10a	2.47573	4.01847	9.03466	9.74481	9.59434	7.84377	4.44092	5.29225	9.26784	17.1784	10.9601	8.73241	7.0535	6.10824	6.45706	7.26936	6.79245	9.30299	8.72657	10.5625	8.20603	65.548	63.0309	65.4522
JrAGO10b	2.52538	4.79168	10.843	9.56204	15.8104	7.88791	8.28338	7.25214	9.57164	12.6324	15.1248	10.6867	6.21588	7.64347	11.6157	3.89701	3.40462	4.89848	6.14257	5.98658	5.54914	43.7282	42.3312	47.4079
JrAGO10c	9.54099	8.8114	20.7172	18.4068	16.414	17.4871	9.43645	11.7895	28.2394	31.8265	28.5112	12.8691	18.2069	11.0555	20.6817	26.1047	25.435	32.5314	39.373	44.5226	40.4521	132.178	131.277	136.794
JrDCL1	18.0759	9.49412	24.1438	20.6962	17.0635	27.6131	12.132	14.792	27.9908	32.6816	20.2373	22.1026	20.8784	19.1556	17.7814	36.2753	29.9778	18.901	18.296	20.9216	19.3081	41.9351	46.221	39.5371
JrDCL2a	3.52443	6.43581	6.90127	9.73011	11.0514	10.3347	7.56192	7.6666	12.8131	12.7061	11.8794	8.16305	5.62978	10.7601	8.42033	4.9089	2.91854	3.93596	8.17552	8.1532	7.76639	24.5568	23.2379	25.0551
JrDCL2b	1.77789	2.01627	5.55732	4.18058	3.12462	5.38954	2.79354	3.62868	5.32418	6.17951	4.23908	5.21417	2.9422	3.11285	4.19611	17.4622	14.68	19.7905	51.172	54.4243	63.6612	50.7677	46.1013	52.3767
JrDCL3	24.209	15.4632	32.0724	32.0303	20.4367	36.6385	14.5402	16.2027	49.0388	47.8522	40.2943	33.5147	27.889	25.2213	25.2742	4.69791	3.32752	3.4294	6.81351	7.56603	6.82292	32.3384	31.7144	33.287
JrDCL4	4.93676	7.86897	11.7959	13.928	12.757	12.3351	9.37431	11.6768	13.6032	14.8337	12.4861	11.8446	7.00645	15.127	12.9198	4.23577	3.57746	3.86505	4.80094	4.12725	4.17531	23.9504	20.964	23.3738
JrRDR1a	19.9053	11.3493	28.8805	22.0028	23.6638	28.4739	15.5081	14.0432	32.2047	28.8216	38.8978	19.9413	20.108	21.032	16.6047	6.14667	4.843	7.47105	5.79287	4.46605	5.1213	38.3858	31.4527	37.1868
JrRDR1b	0.704649	0.373331	0.866925	1.20956	0.167137	0.29668	0.324099	0.164238	1.92616	1.45074	1.33889	4.91872	1.15944	0.186083	0.127386	0.0251706	0.156541	0.262488	0.288203	0.302143	0.232786	2.04784	2.0907	2.56818
JrRDR1c	0.209596	0.0908559	0.245153	0.300558	0.180693	0.136506	0.204855	0.0471073	0.28879	0.183686	0.113054	0.835439	0.16447	0.0800595	0.197633	0.555904	0.550023	0.428199	0.39453	0.303316	0.181759	1.1186	0.833353	1.02465
JrRDR1d	1.20932	2.95682	3.82702	4.72623	1.27182	1.57039	2.26237	2.29654	2.78713	2.35442	4.07827	10.0367	1.81096	1.49477	2.11027	2.67341	1.54855	0.614982	2.31897	2.70047	2.01998	6.86758	6.94725	6.89126
JrRDR1e	0.0401569	0.19148	0.150302	0.31326	0.07913	0.24727	0.11082	0.21661	0.307923	0.201102	0.134775	0.516026	0.155132	0.0409034	0.231645	0.0387298	0.0802896	0	0	0.038742	0.0795969	0	0	0.101324
JrRDR1f	0.0427436	0.0741142	0.119988	0.058842	0.0842271	0.121476	0.0982982	0.0768541	0.122909	0.0856224	0.0409876	0.345834	0.103203	0	0.170699	0	0.0854613	0	0.0429108	0.0412376	0	0.0493231	0.10071	0.107851
JrRDR1g	1.43427	1.17437	2.60957	3.75389	1.20377	1.23291	1.13612	1.51627	5.30804	3.67115	4.67362	4.79096	1.39802	1.9479	1.44964	0	0.0265525	0.0333922	0	0	0.0789701	0.674276	0.563224	0.603157
JrRDR1h	8.51611	7.37162	9.47525	13.5431	10.2523	12.3786	11.5305	9.70172	15.93	11.5283	13.6147	19.8729	11.823	10.1382	10.321	0.462008	0.372468	0.802995	2.27095	1.51484	2.4529	4.63711	3.54277	5.00265
JrRDR1i	2.65083	1.8845	3.01372	12.1519	1.21447	1.3686	1.82885	1.01283	4.84027	2.81433	4.23231	14.8998	3.14896	0.99904	1.10568	0.20453	0.212002	0.0666533	0.186284	0.0767229	0.078815	1.22355	1.18669	1.20394
JrRDR2	12.9948	4.44323	8.15933	8.74945	9.02211	12.3333	6.51312	6.27798	19.4283	15.5454	19.3552	9.6296	13.8755	8.63456	9.35522	3.88874	3.61802	4.42785	3.51135	4.42894	3.70717	24.5246	23.6071	23.4729
JrRDR3	0.557101	1.4843	1.18244	1.90795	1.01745	0.849556	0.849951	1.41702	1.48473	1.90531	1.12055	0.957105	0.223089	1.52245	1.4591	2.46373	1.11387	2.32327	1.88246	1.33713	1.45439	9.28221	9.22032	8.53693
JrRDR6a	47.1346	16.1818	36.3926	31.4424	25.4356	43.6504	25.9924	24.6444	49.7373	50.3061	44.8963	32.5685	36.4544	29.6173	27.92	25.2673	21.7617	13.09	21.5148	25.7309	24.4713	55.9988	58.0449	55.8336
JrRDR6b	45.7044	12.7645	27.6485	25.8156	21.7808	33.2166	20.9083	22.0217	43.4747	44.0367	38.3293	29.2144	31.4031	25.5406	25.3875	30.4107	20.2909	13.5415	20.4636	24.191	22.2967	52.89	61.7057	55.9987
JrDRB1.1	1.22876	0.471186	0.773884	0.585535	0.628606	1.07449	0.630371	0.63731	1.47221	0.852026	1.01966	0.562317	0.890037	0.625801	0.901739	1.59532	1.74809	1.66365	0.711674	0.911897	0.889924	1.63604	1.94865	1.60983
JrDRB1.2	0	0	0	0	0	0	0	0	0	0	0	0	0	0	0	0	0	0	0	0	0	0	0	0
JrDRB2.1	46.8521	36.3039	40.0859	43.5812	51.866	47.6316	44.4535	43.3078	47.4878	49.0881	52.5491	58.5926	47.1865	43.8172	46.6049	16.0175	15.4349	13.2173	14.6332	14.4056	11.0737	33.464	32.4291	30.6276
JrDRB2.2	61.8035	106.721	97.366	128.027	169.005	100.821	109.178	134.481	116.693	153.51	136.342	159.775	116.573	127.169	139.658	17.3177	16.0445	15.6069	13.2191	12.9175	11.2925	58.0664	58.6547	53.7521
JrDRB3-5.1	0.462452	0.518849	0.916357	0.599176	1.01848	1.57198	1.12607	0.440207	0.521483	0.899122	0.573881	0.906282	0.630535	0.66501	1.30365	10.1797	6.14604	3.83041	6.55428	8.50325	8.19591	58.8884	46.5967	51.8223
JrDRB3-5.2	30.9751	31.2121	21.5471	31.8917	42.498	20.6464	18.5479	31.0359	38.6165	36.9896	35.7595	53.9672	32.828	31.0292	30.7212	7.57376	6.10592	3.81554	4.37976	3.84298	3.68458	17.2477	16.4466	15.6983
JrDRB3-5.3	0	0	0	0	0	0	0	0	0	0	0	0	0	0	0	0	0	0	0	0	0	0.104203	0.0531917	0.056963
JrDRB3-5.4	0	0	0	0	0	0	0	0	0	0	0	0	0	0	0	0	0	0	0	0	0	0	0	0
JrDRB4A	95.767	54.5851	54.2144	75.3374	91.5759	68.8363	54.5162	78.4873	98.1021	103.154	100.911	105.662	94.9051	81.2857	84.3635	60.0229	51.3195	48.6865	35.0152	41.5675	32.7458	62.7389	73.5689	66.6517
JrDRB7.4	34.0365	26.1689	22.8682	27.7419	27.4668	26.6566	26.8655	26.6472	31.1013	29.1642	34.9963	33.5169	29.5721	34.1372	30.1867	32.0713	33.8086	28.8923	29.4506	31.6615	29.2465	61.475	66.9147	62.983
JrDRB6.1	2.45322	1.79103	1.32899	2.13295	1.65378	2.0182	2.25669	2.0894	1.73262	1.61652	1.23813	1.78209	2.30693	1.31517	1.77609	0.124528	0.774468	0.324656	0.129622	0.373703	0	2.38387	1.6732	0.488682
JrDRB6.2	2.6469	1.56716	1.57062	2.25145	1.78099	2.14052	2.31608	2.0894	1.73262	1.61652	1.36194	1.90499	2.11988	0.394552	1.89067	0	0	0	0.129622	0	0	2.68185	2.12953	0.977365
JrDRB7.2	0	0	0	0	0	0	0	0	0	0	0	0	0	0	0	0	0	0	0	0	0	0	0	0
JrDRB7.3	0.0559091	0.0242356	0.052315	0	0.0275425	0.0529639	0.0514301	0.050263	0.0267944	0.0279988	0.0536122	0.0266091	0.026998	0.113897	0.0992341	0	0	0	0	0	0	0	0	0
JrDRB7.1	2.23473	5.16648	3.49828	8.83577	2.99112	4.03431	3.67182	4.28346	4.78244	4.561	3.86804	5.17746	2.95913	4.83887	4.06626	5.17818	3.84989	4.38218	6.03904	4.77302	4.51314	14.5965	13.0144	15.3911

## Sheet: Colletotrichum gloeosporioides 
Supplementary table 7C
SRA number	SRR16675562	SRR16675563	SRR16675564	SRR16675565	SRR16675566	SRR16675567	SRR16675568	SRR16675569	SRR16675570	SRR16675571	SRR16675572	SRR16675573	SRR16675574	SRR16675575	SRR16675576	SRR16675577	SRR16675578	SRR16675579	SRR16675580	SRR16675581	SRR16675582	SRR16675583	SRR16675584	SRR16675585	SRR16675586	SRR16675587	SRR16675588	SRR16675589	SRR16675590	SRR16675591
gene\tissue	RNAseq of Walnut B37: leaves infected 72 hpi	RNAseq of Walnut B37: leaves infected 48 hpi	RNAseq of Walnut B37: leaves infected 48 hpi	RNAseq of Walnut B37: leaves infected 48 hpi	RNAseq of Walnut B37: leaves infected 24 hpi	RNAseq of Walnut B37: leaves infected 24 hpi	RNAseq of Walnut B37: leaves infected 24 hpi	RNAseq of Walnut 4-23: leaves infected 120 hpi	RNAseq of Walnut 4-23: leaves infected 120 hpi	RNAseq of Walnut 4-23: leaves infected 120 hpi	RNAseq of Walnut 4-23: leaves infected 72 hpi	RNAseq of Walnut 4-23: leaves infected 72 hpi	RNAseq of Walnut 4-23: leaves infected 72 hpi	RNAseq of Walnut 4-23: leaves infected 48 hpi	RNAseq of Walnut 4-23: leaves infected 48 hpi	RNAseq of Walnut 4-23: leaves infected 48 hpi	RNAseq of Walnut 4-23: leaves infected 24 hpi	RNAseq of Walnut B37: leaves infected 0 hpi	RNAseq of Walnut 4-23: leaves infected 24 hpi	RNAseq of Walnut 4-23: leaves infected 24 hpi	RNAseq of Walnut 4-23: leaves infected 0 hpi	RNAseq of Walnut 4-23: leaves infected 0 hpi	RNAseq of Walnut 4-23: leaves infected 0 hpi	RNAseq of Walnut B37: leaves infected 120 hpi	RNAseq of Walnut B37: leaves infected 120 hpi	RNAseq of Walnut B37: leaves infected 120 hpi	RNAseq of Walnut B37: leaves infected 72 hpi	RNAseq of Walnut B37: leaves infected 72 hpi	RNAseq of Walnut B37: leaves infected 0 hpi	RNAseq of Walnut B37: leaves infected 0 hpi
JrAGO1a	51.2019	26.7461	24.4212	29.4155	29.8482	31.9547	27.3912	50.8308	47.7371	53.7793	44.8798	50.3124	38.9987	66.4763	90.5982	38.5768	38.7558	33.4247	37.1935	40.7622	54.8533	56.7319	53.6798	50.9609	47.5017	50.2959	36.218	25.602	33.9152	32.1948
JrAGO1b	19.2943	12.8937	15.761	10.4033	25.9773	25.1244	24.9055	36.2408	36.0223	36.8726	32.2825	36.2203	28.1896	38.1527	39.3014	38.6704	22.9996	17.6037	20.1949	24.6083	19.5586	16.7243	22.9198	24.6079	30.6307	18.7559	10.311	3.31198	17.3034	15.6678
JrAGO1c	12.8287	3.90912	3.1718	4.25834	4.14392	4.36558	4.33146	12.6645	13.3482	11.3443	7.02066	7.22033	7.06263	8.42254	9.34123	6.52401	11.0719	10.4503	10.8004	11.3813	7.50337	6.09572	8.979	12.4631	13.3185	12.4804	7.62367	4.40458	9.61613	12.5486
JrAGO2a	0.296145	0.0957871	0.0608807	0.143837	0.404616	0.176204	0.614241	0.764962	2.00055	0.173208	0.561922	0.848353	0.306293	0.362539	0.322738	0.3046	4.7687	3.27978	7.87888	2.31597	0.147775	0.208109	0.276985	4.16784	3.46901	5.2672	0.354252	0.540916	0.238551	8.78178
JrAGO2b	14.7143	12.209	10.1625	11.9009	4.24928	4.13469	4.40741	17.8685	19.9343	15.07	9.7894	11.0295	8.05846	6.90881	9.85989	4.4943	13.1858	20.8699	10.9715	14.5849	26.57	15.3826	35.9521	16.2323	10.148	20.2821	13.0691	12.1928	18.4354	24.6826
JrAGO4a	2.2334	2.74324	2.58046	2.63638	4.99165	4.80405	4.9895	4.2939	6.21183	2.86291	2.52121	2.31139	3.21636	1.46742	1.63731	2.09362	4.42369	3.62872	6.07981	3.55624	1.57193	1.0728	2.05026	5.5657	6.74985	4.65324	1.55165	0.846854	3.4035	4.93938
JrAGO4b	6.17923	4.55248	4.19908	4.88299	5.77268	6.61785	4.59581	7.44863	7.04865	7.94525	6.97518	7.12307	6.77561	5.04305	3.28689	7.09125	3.96564	4.38682	5.07399	3.96987	3.49944	3.73921	4.66801	7.45409	8.01296	6.07986	4.54129	3.49046	4.17305	2.98058
JrAGO4c	0	0	0	0	0	0	0	0	0	0	0	0	0	0	0	0	0	0	0	0	0	0	0	0	0	0	0	0	0	0
JrAGO5a	101.9	117.887	116.952	116.993	56.5827	55.8031	57.4507	58.7421	63.4089	54.0375	62.0867	60.7525	64.786	39.8218	33.0132	48.0674	85.9746	37.698	65.1234	104.84	108.521	69.0584	145.551	137.328	40.0419	223.593	96.45	89.2362	36.8028	34.3557
JrAGO5b	0.306743	0.119058	0.113507	0.153242	0.232115	0.131407	0.416436	0.760643	1.70134	0.0615109	0.232813	0.370484	0.126901	0.360492	0.544412	0.2524	4.79976	1.6376	6.86871	2.0824	0.288635	0.0517336	0.397242	3.25625	2.28271	4.10564	0.466216	0.627506	0.458235	4.37594
JrAGO6	1.34196	1.53003	2.06907	1.36876	4.35806	2.97024	4.3269	3.91699	5.04558	2.0519	1.78241	1.7455	1.11035	0.854265	0.501416	1.24224	3.91076	2.97241	5.24381	2.34454	0.688766	0.480945	0.839976	4.37082	5.06261	3.51951	1.16146	0.735336	2.12264	5.37756
JrAGO7	2.24623	2.64459	2.21651	3.21687	4.53263	5.08933	3.99823	8.20038	10.0947	7.62735	5.99538	6.9564	3.77907	1.4959	0.475599	3.2345	4.81219	2.89166	7.50326	2.90032	1.79338	1.06074	2.6633	5.8095	7.98648	4.60454	0.960985	0.196934	0.500047	6.86491
JrAGO10a	3.5671	5.77886	6.73374	6.37918	8.37159	8.90297	7.26408	7.72377	8.07273	6.09566	7.20983	9.1066	4.61968	3.1593	1.10103	5.67888	9.21855	3.76996	10.006	7.43206	10.1094	10.3319	9.2658	10.028	13.3689	6.84466	2.01673	0.770516	2.86201	6.06574
JrAGO10b	1.17159	1.83158	2.00711	1.46325	2.38056	2.13774	2.50367	1.1769	1.77035	0.91365	1.23503	1.20945	0.841486	0.956172	0.6384	1.17157	3.75947	1.84833	4.25702	3.24904	1.25276	1.09775	1.46106	4.05149	5.55011	3.09036	0.824397	0.66576	1.51571	3.07775
JrAGO10c	30.6425	43.6232	43.1799	44.4205	25.52	24.8421	24.999	16.4926	16.5374	16.2186	15.4913	16.6732	14.8993	6.33676	2.16673	11.1441	19.3592	11.3017	16.4767	20.9329	14.4116	4.94151	23.7677	26.155	25.5517	27.7673	20.1529	11.4169	10.4329	15.0677
JrDCL1	20.3215	14.6448	14.5356	14.7116	16.458	17.6332	15.3845	39.0164	38.0337	38.3966	26.193	29.588	22.5315	31.7566	31.3291	32.4266	26.8163	21.1955	23.22	27.3042	26.0426	26.6754	25.4418	35.2356	38.0055	33.2957	19.0128	17.8321	19.4919	21.7481
JrDCL2a	4.30986	5.19076	5.28934	4.50818	6.66464	6.30902	6.95859	6.98168	7.06878	6.16702	4.52037	4.48711	4.36794	2.4392	1.49707	3.31911	5.75426	4.3297	7.32249	4.51895	3.48296	2.24638	4.31928	7.90045	9.58069	6.03262	2.7431	1.93043	5.0624	2.95077
JrDCL2b	1.62547	3.40689	2.72675	4.2407	3.52603	2.94011	4.1438	3.69486	4.32289	2.6511	2.44685	2.25522	2.84679	2.01643	1.17421	2.58584	4.93899	2.3141	5.81411	3.91632	1.09384	1.04175	1.4595	5.43804	5.86899	5.1157	3.16596	4.43366	1.40934	3.64767
JrDCL3	31.3992	20.7502	19.6021	21.0828	24.2911	22.1704	26.223	40.0282	44.7593	39.1005	32.968	34.2754	30.8467	33.0282	32.2549	33.1431	25.9758	11.6045	23.543	27.6551	24.2285	19.7467	29.5746	36.8216	40.004	31.559	22.5245	14.6606	11.1173	13.2061
JrDCL4	9.59271	14.0246	10.9952	16.295	13.0697	14.4054	14.3802	15.9379	19.1334	13.4616	12.8422	13.9224	11.7615	9.66412	4.62597	14.847	11.7498	8.25032	11.4878	11.5728	7.45272	7.45512	7.14177	18.1963	16.531	19.7725	7.92958	6.90132	8.76807	7.17359
JrRDR1a	9.97841	26.2439	26.293	26.5017	30.895	29.7807	32.3837	30.5034	35.2963	25.2433	19.4634	20.6843	18.0041	8.25067	1.83698	16.3813	13.0287	11.2792	13.4029	14.6399	6.29279	4.81122	8.00705	18.7908	20.6771	17.3018	8.09762	6.49211	14.7422	5.60388
JrRDR1b	0.088285	1.59911	1.23416	2.00923	0.705174	0.714391	0.565988	0.304061	0.439447	0.265556	0.111678	0.191388	0.243494	0.0864624	0.0549788	0.121074	0.834427	0.467982	1.23965	0.411315	0.176216	0.0744483	0.254071	0.567997	0.669162	0.558895	0.894558	1.16103	0.232741	0.70756
JrRDR1c	0.67948	0.487328	0.182199	0.590352	0.372585	0.295303	0.36765	0.488387	0.94533	0.207345	0.224223	0.164684	0.274994	0.231462	0.275961	0.121544	1.48919	0.738256	1.86669	1.79912	0.1769	0.0249125	0.280564	1.19743	1.40459	1.60304	0.74836	0.99287	0.44133	1.37326
JrRDR1d	0.0306434	0.118938	0.226785	0.127573	0.154587	0.0875162	0.17334	1.29812	1.89574	0.768112	0.377939	0.227761	0.475401	0.210075	0.200371	0.157591	2.28483	1.32268	3.0912	1.56023	0.183492	0.155044	0.238105	2.42494	3.29392	1.74591	0.103499	0.0895534	0.350062	1.71914
JrRDR1e	0.181124	0.0878761	0.111705	0.226214	0.114215	0.0646604	0.256141	0.374285	1.01426	0.0454009	0.343676	0.462766	0.140498	0.0886925	0.126893	0	0.237764	1.33729	0.401565	0.180825	0.077469	0.0763686	0.0390937	1.52945	2.05927	1.31042	0.305877	0.297745	0.0397907	3.26615
JrRDR1f	0	0.0935365	0.178351	0.160523	0.243144	0.0688254	0.218112	0.298796	1.07959	0.144976	0.228633	0.492575	0.0996987	0.236014	0.225111	0.297443	1.87279	0.218989	3.84688	1.25107	0.206148	0.284507	0.166447	1.20935	0.498162	1.5256	0.081395	0.105641	0.0847077	0.695307
JrRDR1g	1.16804	0.20343	0.295535	0.149622	0.491035	0.34214	0.711549	0.433227	0.73474	0.0900868	0.0852424	0.222605	0.123904	0.175988	0.251788	0.0616095	1.60406	0.408234	2.55642	1.01661	0.102479	0.0505115	0.155143	1.9365	1.20726	2.4377	1.34032	1.55359	0.263183	1.05614
JrRDR1h	4.68137	5.7655	6.47758	4.54748	10.4835	8.82749	11.6788	3.93774	3.93701	4.27252	2.07832	2.36984	2.17259	1.46946	0.840947	2.22232	2.99386	3.57909	3.22678	3.05583	1.69423	1.29058	1.94312	5.068	4.06315	4.96643	4.13025	3.06946	2.66339	4.90631
JrRDR1i	0.747271	1.85627	1.88034	1.4435	0.716257	0.597569	0.980685	0.494144	0.765179	0.479519	0.482091	0.666502	0.401896	0.204916	0.279214	0.368931	1.72647	1.73159	2.78334	0.895243	0.79265	0.806596	0.619355	2.94231	1.35936	4.05485	3.23064	4.32403	1.68106	1.38945
JrRDR2	10.0791	13.3413	13.243	14.1617	21.5197	25.0307	18.4367	32.5153	33.2451	30.7016	30.5058	29.9502	30.4518	22.9071	14.2504	33.3541	15.7045	5.75545	15.6665	17.2537	15.0414	12.4488	16.6942	18.7135	25.2511	11.5178	6.29045	3.0616	6.71493	5.13647
JrRDR3	1.31767	0.505487	0.415773	0.510291	0.772937	0.787646	0.797366	3.48277	4.31444	2.33506	1.8897	2.13526	1.71144	2.25081	2.80519	1.63895	6.1787	2.01883	7.47323	4.40535	0.969884	0.826903	1.508	7.1861	7.60136	6.54025	2.32873	2.97765	1.80417	3.29093
JrRDR6a	38.4418	31.7901	28.2748	33.359	39.2398	38.2376	40.4499	52.6619	53.5259	55.8068	39.2856	39.7205	37.5298	36.183	34.701	37.0094	26.2834	30.3586	22.6563	29.3153	35.0966	34.7691	36.4947	44.195	55.6152	35.7058	28.0275	20.1011	35.2291	26.0944
JrRDR6b	30.9513	24.2357	21.062	25.8796	26.6411	27.1341	23.4181	44.6299	40.3963	48.4157	33.484	35.7935	30.5261	33.6377	32.9377	33.5811	22.8009	20.2117	14.1875	30.3786	32.6766	31.4691	35.0373	44.6468	54.1612	35.1663	24.0672	20.2756	20.2267	18.9969
JrDRB1.1	2.02504	2.84405	3.61526	1.9967	2.68836	3.65269	2.23072	2.31257	1.87576	2.19069	2.93238	2.77262	3.58258	2.24419	2.04095	1.86361	2.1826	0.847449	2.18575	1.91529	1.9602	1.93235	2.02438	1.90284	1.9278	2.07235	2.11489	2.49181	0.749265	1.02503
JrDRB1.2	0	0	0	0	0	0	0	0	0	0	0	0	0	0	0	0	0	0	0	0	0	0	0	0	0	0	0	0	0	0
JrDRB2.1	25.2556	19.4496	16.0351	21.7915	14.5897	22.5709	9.71859	21.6569	19.6693	24.8056	28.1987	29.7961	24.9364	33.5959	25.7849	45.8273	32.7173	22.898	27.3618	37.735	25.8173	24.6296	27.7378	36.0896	32.7923	37.3422	20.8419	15.2302	22.445	25.703
JrDRB2.2	12.3982	7.42202	9.06464	6.49355	7.94427	12.0647	6.27802	14.2048	10.4514	16.9422	12.4265	12.6801	9.56556	11.8485	7.09822	15.7345	17.6403	12.3794	17.4569	18.7163	7.48387	6.32362	9.9703	18.9122	17.3099	21.7017	8.31598	4.34649	11.2464	14.9048
JrDRB3-5.1	0.306743	0.59529	0.302685	0.766208	2.94012	2.71574	3.33149	1.07758	1.50503	0.246043	0.698438	1.25395	0.380704	0.720985	0.687678	0.4417	3.28575	4.18111	5.44056	1.65367	0.629748	0.776003	0.264828	2.19057	1.71203	2.60764	1.81306	3.31682	0.48519	9.34189
JrDRB3-5.2	20.0198	27.7277	24.5354	28.9214	21.6878	19.5472	20.9553	22.7623	20.4411	23.9329	28.2059	26.9063	25.3955	14.9143	7.9518	24.0232	19.4069	9.32932	14.2734	24.8979	14.8566	11.1465	19.1308	24.6455	23.4774	23.7148	13.0034	9.56357	7.66846	11.7936
JrDRB3-5.3	0	0	0	0	0	0	0	0.157813	0.271525	0	0	0	0	0	0	0	0.106934	0	0.169316	0	0	0	0	0.0982669	0.105245	0	0	0	0	0
JrDRB3-5.4	0	0	0	0	0	0	0	0	0	0	0	0	0	0	0	0	0	0	0	0	0	0	0	0	0	0	0	0	0	0
JrDRB4A	63.8621	35.0294	25.6231	39.3282	34.4657	46.939	26.5552	58.4145	48.0162	69.5402	53.5459	54.3175	51.5941	72.9755	77.033	71.9812	39.4804	45.7688	33.5534	43.8356	47.95	43.2045	51.6403	69.584	77.4642	60.4573	45.2963	30.5304	51.8411	30.9025
JrDRB7.4	32.8828	33.3362	38.9253	30.8526	45.804	46.4654	44.0312	28.9552	26.0174	34.0524	39.1125	38.2112	40.0501	31.6753	20.447	43.0595	33.1409	36.6823	33.5682	32.3385	37.9948	29.6744	45.1267	34.7175	46.1107	24.0125	21.0523	14.1637	41.2735	31.3101
JrDRB6.1	0.145593	0	0	0	0.367237	0	0.494145	0.902582	1.86352	0	0	0	0.150582	0.142587	0.136	0.299499	3.05794	0.330754	4.68044	1.01746	0.249087	0	0.502794	3.79362	7.07263	1.97504	0.245873	0.106372	0.383819	0.466742
JrDRB6.2	0	0.141274	0.179584	0	0.550856	0.207903	0.494145	1.05301	1.86352	0	0	0	0	0.142587	0.136	0.299499	3.66953	0.496131	6.93997	1.88958	0.498174	0.122774	0.75419	3.65312	2.25722	4.47676	0.245873	0.319115	0.12794	1.16685
JrDRB7.2	0	0.245598	0.104066	0.140495	0.425615	0.240953	0.381798	0.174343	0.269969	0.169183	0.160086	0.313539	0.436297	0.661014	0.157619	0.694217	0.443006	0.287499	0.374101	0.589602	0.288683	0.0711456	0.3642	0.24426	0.261604	0.457801	0	0	0.370694	0
JrDRB7.3	0	0	0	0	0	0	0	0	0	0	0	0	0	0	0	0	0	0	0	0	0	0	0	0	0	0	0	0	0	0
JrDRB7.1	7.48043	8.64261	7.4675	9.23706	7.87514	7.37775	8.53463	9.23548	10.1764	8.99391	7.24726	7.50943	6.78606	5.02887	3.13849	7.56359	6.69068	4.14046	7.23821	6.51873	4.39249	3.42131	4.95317	8.74845	8.71444	7.76836	5.83461	4.09896	3.42598	5.79197
